# Supplementary material
Source: publisher figshare collection journal article supplement (https://acs.figshare.com/ndownloader/files/9883402)
Supplement: Supplementary file 1 [file 9883402]

ATOM      1  N   PHE A   1     -17.938  50.974   9.403  1.00 50.60      clus N  
ATOM      2  CA  PHE A   1     -18.335  49.663   8.892  1.00 42.83      clus C  
ATOM      3  C   PHE A   1     -17.830  49.381   7.483  1.00 40.34      clus C  
ATOM      4  O   PHE A   1     -17.947  48.261   6.995  1.00 27.86      clus O  
ATOM      5  CB  PHE A   1     -19.857  49.526   8.914  1.00 41.02      clus C  
ATOM      6  CG  PHE A   1     -20.576  50.594   8.136  1.00 26.02      clus C  
ATOM      7  CD1 PHE A   1     -21.198  51.654   8.798  1.00 23.18      clus C  
ATOM      8  CD2 PHE A   1     -20.660  50.524   6.753  1.00 17.83      clus C  
ATOM      9  CE1 PHE A   1     -21.898  52.623   8.097  1.00 22.63      clus C  
ATOM     10  CE2 PHE A   1     -21.354  51.484   6.043  1.00 21.86      clus C  
ATOM     11  CZ  PHE A   1     -21.978  52.535   6.719  1.00 24.91      clus C  
ATOM     12  N   ASN A   2     -17.337  50.410   6.797  1.00 40.52      clus N  
ATOM     13  CA  ASN A   2     -16.832  50.192   5.456  1.00 37.37      clus C  
ATOM     14  C   ASN A   2     -15.712  51.075   4.953  1.00 29.13      clus C  
ATOM     15  O   ASN A   2     -15.796  52.303   4.942  1.00 24.70      clus O  
ATOM     16  CB  ASN A   2     -17.961  50.130   4.431  1.00 50.47      clus C  
ATOM     17  CG  ASN A   2     -17.665  49.139   3.312  1.00 60.17      clus C  
ATOM     18  ND2 ASN A   2     -17.149  47.966   3.685  1.00 60.71      clus N  
ATOM     19  OD1 ASN A   2     -17.892  49.424   2.128  1.00 60.67      clus O  
ATOM     20  N   LEU A   3     -14.676  50.373   4.520  1.00 19.12      clus N  
ATOM     21  CA  LEU A   3     -13.454  50.912   3.971  1.00 19.57      clus C  
ATOM     22  C   LEU A   3     -13.135  49.917   2.875  1.00 18.06      clus C  
ATOM     23  O   LEU A   3     -13.239  48.710   3.086  1.00 16.26      clus O  
ATOM     24  CB  LEU A   3     -12.308  50.830   4.991  1.00 17.13      clus C  
ATOM     25  CG  LEU A   3     -12.391  51.423   6.397  1.00 16.13      clus C  
ATOM     26  CD1 LEU A   3     -12.121  50.321   7.389  1.00 19.17      clus C  
ATOM     27  CD2 LEU A   3     -11.370  52.544   6.564  1.00  9.30      clus C  
ATOM     28  N   ASP A   4     -12.715  50.415   1.721  1.00 24.04      clus N  
ATOM     29  CA  ASP A   4     -12.363  49.550   0.606  1.00 22.30      clus C  
ATOM     30  C   ASP A   4     -11.356  48.526   1.074  1.00 23.84      clus C  
ATOM     31  O   ASP A   4     -10.455  48.847   1.850  1.00 25.93      clus O  
ATOM     32  CB  ASP A   4     -11.757  50.375  -0.531  1.00 21.62      clus C  
ATOM     33  CG  ASP A   4     -10.914  49.533  -1.490  1.00 28.15      clus C  
ATOM     34  OD1 ASP A   4      -9.732  49.241  -1.172  1.00 34.93      clus O  
ATOM     35  OD2 ASP A   4     -11.428  49.166  -2.566  1.00 29.56      clus O1-
ATOM     36  N   VAL A   5     -11.508  47.300   0.589  1.00 30.92      clus N  
ATOM     37  CA  VAL A   5     -10.595  46.216   0.931  1.00 36.38      clus C  
ATOM     38  C   VAL A   5     -10.176  45.533  -0.361  1.00 36.14      clus C  
ATOM     39  O   VAL A   5      -9.521  44.491  -0.357  1.00 31.10      clus O  
ATOM     40  CB  VAL A   5     -11.257  45.198   1.885  1.00 34.71      clus C  
ATOM     41  CG1 VAL A   5     -10.227  44.186   2.384  1.00 39.98      clus C  
ATOM     42  CG2 VAL A   5     -11.893  45.926   3.071  1.00 33.58      clus C  
ATOM     43  N   ASP A   6     -10.535  46.165  -1.472  1.00 38.63      clus N  
ATOM     44  CA  ASP A   6     -10.222  45.655  -2.799  1.00 44.55      clus C  
ATOM     45  C   ASP A   6      -8.919  46.252  -3.325  1.00 44.01      clus C  
ATOM     46  O   ASP A   6      -8.107  45.549  -3.933  1.00 41.53      clus O  
ATOM     47  CB  ASP A   6     -11.367  45.978  -3.757  1.00 53.82      clus C  
ATOM     48  CG  ASP A   6     -12.720  45.695  -3.146  1.00 63.87      clus C  
ATOM     49  OD1 ASP A   6     -13.403  46.662  -2.735  1.00 68.30      clus O  
ATOM     50  OD2 ASP A   6     -13.082  44.503  -3.045  1.00 67.85      clus O1-
ATOM     51  N   SER A   7      -8.713  47.540  -3.071  1.00 45.90      clus N  
ATOM     52  CA  SER A   7      -7.511  48.219  -3.534  1.00 48.80      clus C  
ATOM     53  C   SER A   7      -6.922  49.182  -2.507  1.00 46.66      clus C  
ATOM     54  O   SER A   7      -7.013  50.403  -2.652  1.00 50.63      clus O  
ATOM     55  CB  SER A   7      -7.793  48.964  -4.842  1.00 52.16      clus C  
ATOM     56  OG  SER A   7      -8.256  48.079  -5.847  1.00 57.42      clus O  
ATOM     57  N   PRO A   8      -6.351  48.641  -1.425  1.00 41.98      clus N  
ATOM     58  CA  PRO A   8      -5.761  49.508  -0.409  1.00 39.38      clus C  
ATOM     59  C   PRO A   8      -4.329  49.828  -0.863  1.00 41.18      clus C  
ATOM     60  O   PRO A   8      -3.727  49.056  -1.626  1.00 39.48      clus O  
ATOM     61  CB  PRO A   8      -5.780  48.616   0.818  1.00 38.55      clus C  
ATOM     62  CG  PRO A   8      -5.416  47.292   0.238  1.00 37.89      clus C  
ATOM     63  CD  PRO A   8      -6.258  47.226  -1.025  1.00 41.71      clus C  
ATOM     64  N   ALA A   9      -3.803  50.974  -0.432  1.00 36.40      clus N  
ATOM     65  CA  ALA A   9      -2.452  51.371  -0.806  1.00 29.06      clus C  
ATOM     66  C   ALA A   9      -1.472  50.457  -0.104  1.00 25.43      clus C  
ATOM     67  O   ALA A   9      -1.370  50.460   1.123  1.00 20.86      clus O  
ATOM     68  CB  ALA A   9      -2.204  52.815  -0.436  1.00 34.69      clus C  
ATOM     69  N   GLU A  10      -0.784  49.648  -0.900  1.00 18.60      clus N  
ATOM     70  CA  GLU A  10       0.173  48.691  -0.377  1.00 28.01      clus C  
ATOM     71  C   GLU A  10       1.578  49.265  -0.478  1.00 22.51      clus C  
ATOM     72  O   GLU A  10       2.036  49.555  -1.573  1.00 24.14      clus O  
ATOM     73  CB  GLU A  10       0.050  47.371  -1.165  1.00 40.95      clus C  
ATOM     74  CG  GLU A  10       0.798  46.159  -0.593  1.00 51.01      clus C  
ATOM     75  CD  GLU A  10       2.072  45.806  -1.370  1.00 68.02      clus C  
ATOM     76  OE1 GLU A  10       3.182  46.131  -0.885  1.00 72.57      clus O  
ATOM     77  OE2 GLU A  10       1.970  45.192  -2.458  1.00 70.24      clus O1-
ATOM     78  N   TYR A  11       2.246  49.444   0.664  1.00 17.61      clus N  
ATOM     79  CA  TYR A  11       3.616  49.982   0.714  1.00 18.52      clus C  
ATOM     80  C   TYR A  11       4.546  48.930   1.308  1.00 18.06      clus C  
ATOM     81  O   TYR A  11       4.174  48.272   2.274  1.00 23.44      clus O  
ATOM     82  CB  TYR A  11       3.664  51.252   1.578  1.00 23.39      clus C  
ATOM     83  CG  TYR A  11       2.749  52.376   1.109  1.00 35.00      clus C  
ATOM     84  CD1 TYR A  11       1.475  52.548   1.662  1.00 38.80      clus C  
ATOM     85  CD2 TYR A  11       3.145  53.258   0.097  1.00 35.29      clus C  
ATOM     86  CE1 TYR A  11       0.613  53.571   1.214  1.00 40.80      clus C  
ATOM     87  CE2 TYR A  11       2.288  54.281  -0.358  1.00 40.25      clus C  
ATOM     88  CZ  TYR A  11       1.029  54.426   0.204  1.00 43.15      clus C  
ATOM     89  OH  TYR A  11       0.181  55.403  -0.264  1.00 47.03      clus O  
ATOM     90  N   SER A  12       5.748  48.783   0.751  1.00 18.79      clus N  
ATOM     91  CA  SER A  12       6.716  47.790   1.255  1.00 20.82      clus C  
ATOM     92  C   SER A  12       8.086  48.337   1.722  1.00 22.82      clus C  
ATOM     93  O   SER A  12       8.323  49.543   1.729  1.00 25.35      clus O  
ATOM     94  CB  SER A  12       6.939  46.701   0.205  1.00 18.02      clus C  
ATOM     95  OG  SER A  12       7.651  47.209  -0.910  1.00 23.02      clus O  
ATOM     96  N   GLY A  13       8.993  47.440   2.097  1.00 20.31      clus N  
ATOM     97  CA  GLY A  13      10.303  47.867   2.563  1.00 22.83      clus C  
ATOM     98  C   GLY A  13      11.316  46.738   2.554  1.00 29.69      clus C  
ATOM     99  O   GLY A  13      10.929  45.590   2.344  1.00 36.85      clus O  
ATOM    100  N   PRO A  14      12.611  47.016   2.821  1.00 24.77      clus N  
ATOM    101  CA  PRO A  14      13.705  46.025   2.838  1.00 25.75      clus C  
ATOM    102  C   PRO A  14      13.499  44.816   3.750  1.00 21.71      clus C  
ATOM    103  O   PRO A  14      12.956  44.946   4.839  1.00 27.79      clus O  
ATOM    104  CB  PRO A  14      14.918  46.858   3.267  1.00 21.65      clus C  
ATOM    105  CG  PRO A  14      14.306  47.958   4.074  1.00 24.03      clus C  
ATOM    106  CD  PRO A  14      13.108  48.336   3.242  1.00 18.22      clus C  
ATOM    107  N   GLU A  15      13.974  43.650   3.318  1.00 26.01      clus N  
ATOM    108  CA  GLU A  15      13.825  42.414   4.100  1.00 32.28      clus C  
ATOM    109  C   GLU A  15      14.649  42.340   5.391  1.00 24.35      clus C  
ATOM    110  O   GLU A  15      15.878  42.476   5.389  1.00 13.66      clus O  
ATOM    111  CB  GLU A  15      14.058  41.157   3.231  1.00 49.17      clus C  
ATOM    112  CG  GLU A  15      15.496  40.955   2.708  1.00 72.63      clus C  
ATOM    113  CD  GLU A  15      15.620  39.826   1.682  1.00 80.81      clus C  
ATOM    114  OE1 GLU A  15      15.214  38.684   1.994  1.00 82.36      clus O  
ATOM    115  OE2 GLU A  15      16.132  40.081   0.564  1.00 83.00      clus O1-
ATOM    116  N   GLY A  16      13.937  42.114   6.490  1.00 20.96      clus N  
ATOM    117  CA  GLY A  16      14.555  42.009   7.797  1.00 16.13      clus C  
ATOM    118  C   GLY A  16      14.636  43.335   8.514  1.00 11.42      clus C  
ATOM    119  O   GLY A  16      15.280  43.423   9.560  1.00 11.58      clus O  
ATOM    120  N   SER A  17      13.923  44.335   7.995  1.00  5.66      clus N  
ATOM    121  CA  SER A  17      13.941  45.685   8.550  1.00  2.00      clus C  
ATOM    122  C   SER A  17      12.715  46.096   9.359  1.00  5.54      clus C  
ATOM    123  O   SER A  17      12.586  47.235   9.783  1.00  2.12      clus O  
ATOM    124  CB  SER A  17      14.138  46.678   7.414  1.00  2.22      clus C  
ATOM    125  OG  SER A  17      12.957  46.805   6.655  1.00  2.00      clus O  
ATOM    126  N   TYR A  18      11.780  45.181   9.525  1.00 14.62      clus N  
ATOM    127  CA  TYR A  18      10.575  45.476  10.281  1.00 13.66      clus C  
ATOM    128  C   TYR A  18       9.828  46.702   9.753  1.00 18.15      clus C  
ATOM    129  O   TYR A  18       9.237  47.451  10.527  1.00 25.83      clus O  
ATOM    130  CB  TYR A  18      10.918  45.646  11.764  1.00  9.23      clus C  
ATOM    131  CG  TYR A  18      11.366  44.372  12.451  1.00  9.53      clus C  
ATOM    132  CD1 TYR A  18      11.320  44.256  13.831  1.00  9.48      clus C  
ATOM    133  CD2 TYR A  18      11.864  43.293  11.728  1.00  4.64      clus C  
ATOM    134  CE1 TYR A  18      11.757  43.118  14.466  1.00  2.00      clus C  
ATOM    135  CE2 TYR A  18      12.305  42.147  12.363  1.00  2.08      clus C  
ATOM    136  CZ  TYR A  18      12.249  42.068  13.732  1.00  2.00      clus C  
ATOM    137  OH  TYR A  18      12.684  40.940  14.383  1.00  9.41      clus O  
ATOM    138  N   PHE A  19       9.873  46.915   8.440  1.00 14.73      clus N  
ATOM    139  CA  PHE A  19       9.177  48.045   7.819  1.00 13.69      clus C  
ATOM    140  C   PHE A  19       7.704  47.957   8.205  1.00 13.32      clus C  
ATOM    141  O   PHE A  19       6.991  47.062   7.756  1.00 23.79      clus O  
ATOM    142  CB  PHE A  19       9.329  48.002   6.289  1.00 14.70      clus C  
ATOM    143  CG  PHE A  19       8.528  49.054   5.558  1.00 14.62      clus C  
ATOM    144  CD1 PHE A  19       7.271  48.760   5.047  1.00 18.65      clus C  
ATOM    145  CD2 PHE A  19       9.032  50.331   5.377  1.00 13.67      clus C  
ATOM    146  CE1 PHE A  19       6.529  49.725   4.370  1.00 21.32      clus C  
ATOM    147  CE2 PHE A  19       8.299  51.296   4.705  1.00 17.14      clus C  
ATOM    148  CZ  PHE A  19       7.042  50.993   4.200  1.00 19.24      clus C  
ATOM    149  N   GLY A  20       7.271  48.856   9.080  1.00  8.89      clus N  
ATOM    150  CA  GLY A  20       5.891  48.839   9.512  1.00  4.27      clus C  
ATOM    151  C   GLY A  20       5.737  48.524  10.990  1.00  3.34      clus C  
ATOM    152  O   GLY A  20       4.638  48.228  11.448  1.00 11.24      clus O  
ATOM    153  N   PHE A  21       6.822  48.574  11.750  1.00  2.34      clus N  
ATOM    154  CA  PHE A  21       6.730  48.300  13.179  1.00  2.29      clus C  
ATOM    155  C   PHE A  21       6.041  49.458  13.904  1.00  2.00      clus C  
ATOM    156  O   PHE A  21       5.641  49.329  15.061  1.00  2.00      clus O  
ATOM    157  CB  PHE A  21       8.116  48.052  13.772  1.00  3.51      clus C  
ATOM    158  CG  PHE A  21       8.089  47.646  15.205  1.00  2.00      clus C  
ATOM    159  CD1 PHE A  21       7.819  46.339  15.552  1.00  2.00      clus C  
ATOM    160  CD2 PHE A  21       8.304  48.567  16.202  1.00  2.00      clus C  
ATOM    161  CE1 PHE A  21       7.773  45.949  16.872  1.00  2.00      clus C  
ATOM    162  CE2 PHE A  21       8.259  48.184  17.519  1.00  2.00      clus C  
ATOM    163  CZ  PHE A  21       7.989  46.871  17.858  1.00  2.00      clus C  
ATOM    164  N   ALA A  22       5.964  50.606  13.237  1.00  2.00      clus N  
ATOM    165  CA  ALA A  22       5.310  51.791  13.783  1.00  2.00      clus C  
ATOM    166  C   ALA A  22       4.946  52.671  12.616  1.00  4.38      clus C  
ATOM    167  O   ALA A  22       5.786  52.980  11.774  1.00  5.35      clus O  
ATOM    168  CB  ALA A  22       6.205  52.522  14.726  1.00  8.05      clus C  
ATOM    169  N   VAL A  23       3.674  53.048  12.555  1.00  6.07      clus N  
ATOM    170  CA  VAL A  23       3.174  53.861  11.459  1.00  9.48      clus C  
ATOM    171  C   VAL A  23       2.576  55.188  11.914  1.00  8.78      clus C  
ATOM    172  O   VAL A  23       2.287  55.370  13.114  1.00  2.00      clus O  
ATOM    173  CB  VAL A  23       2.106  53.072  10.563  1.00  5.80      clus C  
ATOM    174  CG1 VAL A  23       2.713  51.792   9.999  1.00  5.06      clus C  
ATOM    175  CG2 VAL A  23       0.807  52.781  11.332  1.00  2.00      clus C  
ATOM    176  N   ASP A  24       2.467  56.119  10.949  1.00  5.75      clus N  
ATOM    177  CA  ASP A  24       1.866  57.432  11.157  1.00  8.18      clus C  
ATOM    178  C   ASP A  24       1.553  58.268   9.924  1.00 11.40      clus C  
ATOM    179  O   ASP A  24       1.934  57.928   8.801  1.00  7.80      clus O  
ATOM    180  CB  ASP A  24       2.663  58.266  12.147  1.00 14.74      clus C  
ATOM    181  CG  ASP A  24       1.789  58.802  13.267  1.00 25.26      clus C  
ATOM    182  OD1 ASP A  24       0.920  59.667  12.996  1.00 18.39      clus O  
ATOM    183  OD2 ASP A  24       1.950  58.326  14.413  1.00 33.95      clus O1-
ATOM    184  N   PHE A  25       0.795  59.339  10.170  1.00 20.83      clus N  
ATOM    185  CA  PHE A  25       0.378  60.311   9.158  1.00 24.15      clus C  
ATOM    186  C   PHE A  25       1.171  61.608   9.314  1.00 25.54      clus C  
ATOM    187  O   PHE A  25       1.259  62.170  10.405  1.00 25.24      clus O  
ATOM    188  CB  PHE A  25      -1.101  60.669   9.318  1.00 24.07      clus C  
ATOM    189  CG  PHE A  25      -2.046  59.564   8.963  1.00 28.74      clus C  
ATOM    190  CD1 PHE A  25      -2.933  59.066   9.913  1.00 27.79      clus C  
ATOM    191  CD2 PHE A  25      -2.098  59.061   7.664  1.00 25.88      clus C  
ATOM    192  CE1 PHE A  25      -3.858  58.090   9.569  1.00 27.38      clus C  
ATOM    193  CE2 PHE A  25      -3.020  58.082   7.311  1.00  6.96      clus C  
ATOM    194  CZ  PHE A  25      -3.900  57.600   8.262  1.00 22.49      clus C  
ATOM    195  N   PHE A  26       1.734  62.089   8.218  1.00 28.25      clus N  
ATOM    196  CA  PHE A  26       2.480  63.331   8.250  1.00 29.39      clus C  
ATOM    197  C   PHE A  26       1.736  64.372   7.433  1.00 31.22      clus C  
ATOM    198  O   PHE A  26       1.821  64.373   6.205  1.00 33.51      clus O  
ATOM    199  CB  PHE A  26       3.874  63.139   7.669  1.00 29.72      clus C  
ATOM    200  CG  PHE A  26       4.688  64.402   7.644  1.00 34.21      clus C  
ATOM    201  CD1 PHE A  26       5.480  64.715   6.541  1.00 32.40      clus C  
ATOM    202  CD2 PHE A  26       4.656  65.282   8.727  1.00 28.18      clus C  
ATOM    203  CE1 PHE A  26       6.225  65.879   6.522  1.00 30.67      clus C  
ATOM    204  CE2 PHE A  26       5.393  66.443   8.717  1.00 17.29      clus C  
ATOM    205  CZ  PHE A  26       6.180  66.745   7.618  1.00 26.21      clus C  
ATOM    206  N   VAL A  27       1.029  65.269   8.116  1.00 31.87      clus N  
ATOM    207  CA  VAL A  27       0.272  66.312   7.443  1.00 31.05      clus C  
ATOM    208  C   VAL A  27       0.829  67.726   7.715  1.00 30.68      clus C  
ATOM    209  O   VAL A  27       0.434  68.399   8.674  1.00 29.25      clus O  
ATOM    210  CB  VAL A  27      -1.226  66.193   7.786  1.00 27.96      clus C  
ATOM    211  CG1 VAL A  27      -1.420  66.104   9.293  1.00 37.20      clus C  
ATOM    212  CG2 VAL A  27      -2.002  67.352   7.188  1.00 35.34      clus C  
ATOM    213  N   PRO A  28       1.780  68.179   6.864  1.00 26.93      clus N  
ATOM    214  CA  PRO A  28       2.449  69.489   6.931  1.00 21.91      clus C  
ATOM    215  C   PRO A  28       1.488  70.666   6.808  1.00 25.57      clus C  
ATOM    216  O   PRO A  28       0.534  70.609   6.033  1.00 32.96      clus O  
ATOM    217  CB  PRO A  28       3.383  69.451   5.718  1.00 16.17      clus C  
ATOM    218  CG  PRO A  28       3.667  67.992   5.543  1.00 14.76      clus C  
ATOM    219  CD  PRO A  28       2.321  67.385   5.744  1.00 17.57      clus C  
ATOM    220  N   SER A  29       1.762  71.742   7.548  1.00 31.47      clus N  
ATOM    221  CA  SER A  29       0.932  72.952   7.513  1.00 35.08      clus C  
ATOM    222  C   SER A  29       1.185  73.709   6.216  1.00 30.97      clus C  
ATOM    223  O   SER A  29       0.266  74.246   5.594  1.00 26.90      clus O  
ATOM    224  CB  SER A  29       1.251  73.872   8.707  1.00 39.03      clus C  
ATOM    225  OG  SER A  29       0.182  73.913   9.646  1.00 39.27      clus O  
ATOM    226  N   ALA A  30       2.444  73.712   5.804  1.00 32.50      clus N  
ATOM    227  CA  ALA A  30       2.845  74.404   4.601  1.00 33.46      clus C  
ATOM    228  C   ALA A  30       2.597  73.657   3.297  1.00 33.38      clus C  
ATOM    229  O   ALA A  30       3.080  74.079   2.249  1.00 34.34      clus O  
ATOM    230  CB  ALA A  30       4.287  74.783   4.711  1.00 40.01      clus C  
ATOM    231  N   SER A  31       1.858  72.551   3.346  1.00 37.67      clus N  
ATOM    232  CA  SER A  31       1.579  71.793   2.125  1.00 32.90      clus C  
ATOM    233  C   SER A  31       0.162  71.267   1.997  1.00 34.20      clus C  
ATOM    234  O   SER A  31      -0.479  70.877   2.977  1.00 30.92      clus O  
ATOM    235  CB  SER A  31       2.552  70.639   1.949  1.00 21.20      clus C  
ATOM    236  OG  SER A  31       2.406  70.093   0.654  1.00 12.32      clus O  
ATOM    237  N   SER A  32      -0.304  71.240   0.756  1.00 33.73      clus N  
ATOM    238  CA  SER A  32      -1.639  70.776   0.435  1.00 38.21      clus C  
ATOM    239  C   SER A  32      -1.762  69.280   0.679  1.00 42.06      clus C  
ATOM    240  O   SER A  32      -2.762  68.815   1.225  1.00 46.03      clus O  
ATOM    241  CB  SER A  32      -1.968  71.097  -1.023  1.00 40.81      clus C  
ATOM    242  OG  SER A  32      -1.072  70.434  -1.897  1.00 54.12      clus O  
ATOM    243  N   ARG A  33      -0.729  68.532   0.308  1.00 37.23      clus N  
ATOM    244  CA  ARG A  33      -0.765  67.096   0.495  1.00 38.20      clus C  
ATOM    245  C   ARG A  33      -0.104  66.544   1.766  1.00 37.37      clus C  
ATOM    246  O   ARG A  33       0.719  67.207   2.399  1.00 31.67      clus O  
ATOM    247  CB  ARG A  33      -0.220  66.400  -0.737  1.00 39.68      clus C  
ATOM    248  CG  ARG A  33       1.255  66.545  -0.964  1.00 44.90      clus C  
ATOM    249  CD  ARG A  33       1.623  65.654  -2.135  1.00 63.93      clus C  
ATOM    250  NE  ARG A  33       3.049  65.653  -2.439  1.00 71.31      clus N  
ATOM    251  CZ  ARG A  33       3.720  64.593  -2.885  1.00 77.53      clus C  
ATOM    252  NH1 ARG A  33       3.100  63.430  -3.084  1.00 76.22      clus N1+
ATOM    253  NH2 ARG A  33       5.023  64.695  -3.129  1.00 78.62      clus N  
ATOM    254  N   MET A  34      -0.507  65.325   2.134  1.00 34.70      clus N  
ATOM    255  CA  MET A  34       0.001  64.616   3.321  1.00 30.61      clus C  
ATOM    256  C   MET A  34       0.730  63.284   2.988  1.00 24.51      clus C  
ATOM    257  O   MET A  34       0.784  62.887   1.821  1.00 21.02      clus O  
ATOM    258  CB  MET A  34      -1.130  64.421   4.360  1.00 30.66      clus C  
ATOM    259  CG  MET A  34      -2.526  64.109   3.797  1.00 34.58      clus C  
ATOM    260  SD  MET A  34      -3.773  65.424   4.022  1.00 41.07      clus S  
ATOM    261  CE  MET A  34      -4.264  65.216   5.719  1.00 27.75      clus C  
ATOM    262  N   PHE A  35       1.340  62.632   3.987  1.00 18.20      clus N  
ATOM    263  CA  PHE A  35       2.072  61.377   3.748  1.00 19.13      clus C  
ATOM    264  C   PHE A  35       1.961  60.331   4.848  1.00 20.02      clus C  
ATOM    265  O   PHE A  35       1.430  60.583   5.920  1.00 14.03      clus O  
ATOM    266  CB  PHE A  35       3.565  61.641   3.564  1.00 26.23      clus C  
ATOM    267  CG  PHE A  35       3.882  62.686   2.553  1.00 31.90      clus C  
ATOM    268  CD1 PHE A  35       3.875  64.033   2.907  1.00 31.20      clus C  
ATOM    269  CD2 PHE A  35       4.199  62.331   1.252  1.00 32.86      clus C  
ATOM    270  CE1 PHE A  35       4.177  65.007   1.979  1.00 29.46      clus C  
ATOM    271  CE2 PHE A  35       4.505  63.292   0.316  1.00 28.08      clus C  
ATOM    272  CZ  PHE A  35       4.495  64.634   0.676  1.00 32.91      clus C  
ATOM    273  N   LEU A  36       2.531  59.164   4.577  1.00 23.89      clus N  
ATOM    274  CA  LEU A  36       2.551  58.062   5.534  1.00 23.58      clus C  
ATOM    275  C   LEU A  36       3.959  57.964   6.084  1.00 17.87      clus C  
ATOM    276  O   LEU A  36       4.929  58.075   5.342  1.00 17.64      clus O  
ATOM    277  CB  LEU A  36       2.202  56.724   4.862  1.00 27.11      clus C  
ATOM    278  CG  LEU A  36       0.743  56.343   4.582  1.00 31.62      clus C  
ATOM    279  CD1 LEU A  36       0.222  57.024   3.336  1.00 30.48      clus C  
ATOM    280  CD2 LEU A  36       0.665  54.850   4.404  1.00 39.21      clus C  
ATOM    281  N   LEU A  37       4.077  57.768   7.384  1.00  2.68      clus N  
ATOM    282  CA  LEU A  37       5.390  57.647   7.985  1.00  9.22      clus C  
ATOM    283  C   LEU A  37       5.490  56.238   8.479  1.00  5.91      clus C  
ATOM    284  O   LEU A  37       4.670  55.803   9.276  1.00  2.74      clus O  
ATOM    285  CB  LEU A  37       5.551  58.603   9.163  1.00  9.43      clus C  
ATOM    286  CG  LEU A  37       5.311  60.061   8.827  1.00  2.00      clus C  
ATOM    287  CD1 LEU A  37       5.400  60.857  10.097  1.00  2.00      clus C  
ATOM    288  CD2 LEU A  37       6.305  60.524   7.784  1.00  2.00      clus C  
ATOM    289  N   VAL A  38       6.494  55.520   8.008  1.00  6.70      clus N  
ATOM    290  CA  VAL A  38       6.656  54.145   8.437  1.00  6.64      clus C  
ATOM    291  C   VAL A  38       7.998  53.896   9.118  1.00  3.20      clus C  
ATOM    292  O   VAL A  38       9.067  53.986   8.507  1.00  2.00      clus O  
ATOM    293  CB  VAL A  38       6.471  53.144   7.264  1.00  6.23      clus C  
ATOM    294  CG1 VAL A  38       6.472  51.739   7.794  1.00 13.47      clus C  
ATOM    295  CG2 VAL A  38       5.182  53.422   6.498  1.00  6.92      clus C  
ATOM    296  N   GLY A  39       7.927  53.631  10.412  1.00  2.87      clus N  
ATOM    297  CA  GLY A  39       9.127  53.339  11.155  1.00  8.40      clus C  
ATOM    298  C   GLY A  39       9.607  51.958  10.757  1.00  4.28      clus C  
ATOM    299  O   GLY A  39       8.815  51.034  10.612  1.00  2.00      clus O  
ATOM    300  N   ALA A  40      10.908  51.832  10.537  1.00  2.01      clus N  
ATOM    301  CA  ALA A  40      11.495  50.568  10.165  1.00  2.00      clus C  
ATOM    302  C   ALA A  40      12.815  50.369  10.877  1.00  7.61      clus C  
ATOM    303  O   ALA A  40      13.863  50.661  10.315  1.00 12.20      clus O  
ATOM    304  CB  ALA A  40      11.697  50.510   8.692  1.00  2.00      clus C  
ATOM    305  N   PRO A  41      12.782  49.934  12.156  1.00 11.01      clus N  
ATOM    306  CA  PRO A  41      14.000  49.685  12.955  1.00  2.00      clus C  
ATOM    307  C   PRO A  41      14.737  48.505  12.308  1.00  2.21      clus C  
ATOM    308  O   PRO A  41      14.176  47.877  11.410  1.00  8.90      clus O  
ATOM    309  CB  PRO A  41      13.432  49.318  14.322  1.00  2.00      clus C  
ATOM    310  CG  PRO A  41      12.078  48.724  13.992  1.00  2.00      clus C  
ATOM    311  CD  PRO A  41      11.564  49.667  12.951  1.00  4.25      clus C  
ATOM    312  N   LYS A  42      15.960  48.176  12.731  1.00  5.65      clus N  
ATOM    313  CA  LYS A  42      16.695  47.049  12.098  1.00 12.59      clus C  
ATOM    314  C   LYS A  42      17.225  47.410  10.672  1.00 17.06      clus C  
ATOM    315  O   LYS A  42      18.170  46.781  10.160  1.00 14.87      clus O  
ATOM    316  CB  LYS A  42      15.811  45.779  11.987  1.00  6.79      clus C  
ATOM    317  CG  LYS A  42      15.510  44.994  13.270  1.00 10.35      clus C  
ATOM    318  CD  LYS A  42      16.701  44.145  13.713  1.00 11.83      clus C  
ATOM    319  CE  LYS A  42      16.282  42.846  14.402  1.00 10.34      clus C  
ATOM    320  NZ  LYS A  42      15.408  43.020  15.605  1.00 14.84      clus N1+
ATOM    321  N   ALA A  43      16.591  48.401  10.031  1.00 13.75      clus N  
ATOM    322  CA  ALA A  43      16.979  48.855   8.695  1.00 16.58      clus C  
ATOM    323  C   ALA A  43      18.348  49.509   8.690  1.00 23.08      clus C  
ATOM    324  O   ALA A  43      18.571  50.496   9.391  1.00 26.61      clus O  
ATOM    325  CB  ALA A  43      15.970  49.830   8.166  1.00  8.21      clus C  
ATOM    326  N   ASN A  44      19.254  48.972   7.876  1.00 26.66      clus N  
ATOM    327  CA  ASN A  44      20.601  49.512   7.751  1.00 23.25      clus C  
ATOM    328  C   ASN A  44      20.618  50.908   7.156  1.00 27.62      clus C  
ATOM    329  O   ASN A  44      19.779  51.255   6.322  1.00 27.25      clus O  
ATOM    330  CB  ASN A  44      21.452  48.592   6.904  1.00 13.49      clus C  
ATOM    331  CG  ASN A  44      21.845  47.362   7.643  1.00 16.91      clus C  
ATOM    332  ND2 ASN A  44      22.055  46.262   6.929  1.00 18.87      clus N  
ATOM    333  OD1 ASN A  44      21.944  47.394   8.866  1.00 21.30      clus O  
ATOM    334  N   THR A  45      21.582  51.712   7.597  1.00 30.72      clus N  
ATOM    335  CA  THR A  45      21.711  53.081   7.122  1.00 29.38      clus C  
ATOM    336  C   THR A  45      23.128  53.387   6.688  1.00 33.58      clus C  
ATOM    337  O   THR A  45      24.071  52.647   6.999  1.00 37.81      clus O  
ATOM    338  CB  THR A  45      21.311  54.081   8.205  1.00 22.94      clus C  
ATOM    339  CG2 THR A  45      19.809  54.083   8.397  1.00 23.21      clus C  
ATOM    340  OG1 THR A  45      21.944  53.722   9.437  1.00 14.44      clus O  
ATOM    341  N   THR A  46      23.264  54.493   5.965  1.00 31.99      clus N  
ATOM    342  CA  THR A  46      24.560  54.943   5.478  1.00 30.12      clus C  
ATOM    343  C   THR A  46      25.459  55.504   6.588  1.00 30.43      clus C  
ATOM    344  O   THR A  46      26.598  55.875   6.322  1.00 32.10      clus O  
ATOM    345  CB  THR A  46      24.397  55.999   4.373  1.00 27.96      clus C  
ATOM    346  CG2 THR A  46      24.026  55.337   3.065  1.00 31.62      clus C  
ATOM    347  OG1 THR A  46      23.382  56.939   4.750  1.00 27.30      clus O  
ATOM    348  N   GLN A  47      24.951  55.552   7.822  1.00 25.25      clus N  
ATOM    349  CA  GLN A  47      25.705  56.054   8.975  1.00 20.33      clus C  
ATOM    350  C   GLN A  47      26.984  55.256   9.152  1.00 24.02      clus C  
ATOM    351  O   GLN A  47      26.947  54.027   9.220  1.00 27.74      clus O  
ATOM    352  CB  GLN A  47      24.884  55.948  10.256  1.00 15.70      clus C  
ATOM    353  CG  GLN A  47      23.513  56.582  10.163  1.00 20.88      clus C  
ATOM    354  CD  GLN A  47      22.827  56.622  11.499  1.00 24.62      clus C  
ATOM    355  NE2 GLN A  47      21.596  56.107  11.552  1.00 28.94      clus N  
ATOM    356  OE1 GLN A  47      23.399  57.101  12.489  1.00 26.55      clus O  
ATOM    357  N   PRO A  48      28.129  55.950   9.269  1.00 25.01      clus N  
ATOM    358  CA  PRO A  48      29.476  55.405   9.437  1.00 17.88      clus C  
ATOM    359  C   PRO A  48      29.651  54.410  10.586  1.00 17.88      clus C  
ATOM    360  O   PRO A  48      29.672  54.797  11.771  1.00 12.07      clus O  
ATOM    361  CB  PRO A  48      30.308  56.660   9.657  1.00 21.57      clus C  
ATOM    362  CG  PRO A  48      29.573  57.701   8.879  1.00 14.20      clus C  
ATOM    363  CD  PRO A  48      28.170  57.425   9.269  1.00 22.13      clus C  
ATOM    364  N   GLY A  49      29.773  53.132  10.226  1.00 17.97      clus N  
ATOM    365  CA  GLY A  49      29.975  52.072  11.215  1.00 24.82      clus C  
ATOM    366  C   GLY A  49      28.819  51.665  12.129  1.00 25.19      clus C  
ATOM    367  O   GLY A  49      29.033  51.009  13.160  1.00 23.05      clus O  
ATOM    368  N   ILE A  50      27.601  52.027  11.739  1.00 21.88      clus N  
ATOM    369  CA  ILE A  50      26.411  51.710  12.510  1.00 21.71      clus C  
ATOM    370  C   ILE A  50      25.605  50.648  11.777  1.00 29.08      clus C  
ATOM    371  O   ILE A  50      25.212  50.858  10.622  1.00 32.23      clus O  
ATOM    372  CB  ILE A  50      25.531  52.958  12.675  1.00 13.43      clus C  
ATOM    373  CG1 ILE A  50      26.337  54.085  13.323  1.00 12.54      clus C  
ATOM    374  CG2 ILE A  50      24.266  52.628  13.447  1.00  5.55      clus C  
ATOM    375  CD1 ILE A  50      27.050  53.702  14.586  1.00  5.79      clus C  
ATOM    376  N   VAL A  51      25.346  49.520  12.449  1.00 29.91      clus N  
ATOM    377  CA  VAL A  51      24.567  48.423  11.851  1.00 20.06      clus C  
ATOM    378  C   VAL A  51      23.149  48.370  12.400  1.00 13.49      clus C  
ATOM    379  O   VAL A  51      22.953  48.280  13.607  1.00  6.80      clus O  
ATOM    380  CB  VAL A  51      25.189  47.062  12.119  1.00 20.86      clus C  
ATOM    381  CG1 VAL A  51      24.949  46.154  10.935  1.00 13.48      clus C  
ATOM    382  CG2 VAL A  51      26.664  47.200  12.447  1.00 31.24      clus C  
ATOM    383  N   GLU A  52      22.171  48.392  11.500  1.00 15.88      clus N  
ATOM    384  CA  GLU A  52      20.744  48.364  11.855  1.00 21.42      clus C  
ATOM    385  C   GLU A  52      20.346  49.505  12.781  1.00 20.00      clus C  
ATOM    386  O   GLU A  52      19.768  49.291  13.861  1.00 19.32      clus O  
ATOM    387  CB  GLU A  52      20.344  47.015  12.460  1.00 28.75      clus C  
ATOM    388  CG  GLU A  52      20.539  45.860  11.506  1.00 35.66      clus C  
ATOM    389  CD  GLU A  52      19.930  44.578  11.996  1.00 37.29      clus C  
ATOM    390  OE1 GLU A  52      19.793  44.395  13.222  1.00 40.90      clus O  
ATOM    391  OE2 GLU A  52      19.587  43.746  11.138  1.00 44.46      clus O1-
ATOM    392  N   GLY A  53      20.665  50.717  12.329  1.00 16.40      clus N  
ATOM    393  CA  GLY A  53      20.363  51.916  13.082  1.00 12.14      clus C  
ATOM    394  C   GLY A  53      18.896  52.267  12.993  1.00 11.58      clus C  
ATOM    395  O   GLY A  53      18.356  52.958  13.866  1.00  8.51      clus O  
ATOM    396  N   GLY A  54      18.248  51.761  11.947  1.00  6.59      clus N  
ATOM    397  CA  GLY A  54      16.837  52.030  11.737  1.00  9.81      clus C  
ATOM    398  C   GLY A  54      16.603  53.310  10.961  1.00 10.89      clus C  
ATOM    399  O   GLY A  54      17.548  54.037  10.659  1.00 18.10      clus O  
ATOM    400  N   GLN A  55      15.352  53.591  10.624  1.00  5.29      clus N  
ATOM    401  CA  GLN A  55      15.041  54.804   9.887  1.00  9.54      clus C  
ATOM    402  C   GLN A  55      13.577  54.946   9.577  1.00  8.48      clus C  
ATOM    403  O   GLN A  55      12.953  54.016   9.079  1.00 19.88      clus O  
ATOM    404  CB  GLN A  55      15.813  54.842   8.572  1.00 10.31      clus C  
ATOM    405  CG  GLN A  55      15.591  53.641   7.695  1.00 19.18      clus C  
ATOM    406  CD  GLN A  55      16.204  53.825   6.337  1.00 32.39      clus C  
ATOM    407  NE2 GLN A  55      15.367  54.076   5.336  1.00 32.59      clus N  
ATOM    408  OE1 GLN A  55      17.421  53.754   6.184  1.00 36.23      clus O  
ATOM    409  N   VAL A  56      13.020  56.103   9.890  1.00 11.70      clus N  
ATOM    410  CA  VAL A  56      11.628  56.346   9.577  1.00 15.57      clus C  
ATOM    411  C   VAL A  56      11.622  56.705   8.093  1.00 18.10      clus C  
ATOM    412  O   VAL A  56      12.561  57.335   7.604  1.00 17.18      clus O  
ATOM    413  CB  VAL A  56      11.074  57.520  10.388  1.00 11.16      clus C  
ATOM    414  CG1 VAL A  56       9.634  57.808   9.984  1.00 15.03      clus C  
ATOM    415  CG2 VAL A  56      11.165  57.211  11.866  1.00  7.40      clus C  
ATOM    416  N   LEU A  57      10.631  56.217   7.357  1.00 20.15      clus N  
ATOM    417  CA  LEU A  57      10.544  56.526   5.937  1.00 14.06      clus C  
ATOM    418  C   LEU A  57       9.283  57.327   5.685  1.00 15.45      clus C  
ATOM    419  O   LEU A  57       8.276  57.151   6.388  1.00  6.10      clus O  
ATOM    420  CB  LEU A  57      10.557  55.254   5.074  1.00  6.17      clus C  
ATOM    421  CG  LEU A  57      11.880  54.474   4.974  1.00  4.32      clus C  
ATOM    422  CD1 LEU A  57      11.929  53.399   6.028  1.00 10.62      clus C  
ATOM    423  CD2 LEU A  57      12.045  53.832   3.613  1.00  2.34      clus C  
ATOM    424  N   LYS A  58       9.397  58.306   4.788  1.00 20.77      clus N  
ATOM    425  CA  LYS A  58       8.263  59.127   4.408  1.00 28.59      clus C  
ATOM    426  C   LYS A  58       7.776  58.508   3.119  1.00 33.28      clus C  
ATOM    427  O   LYS A  58       8.549  58.351   2.159  1.00 30.33      clus O  
ATOM    428  CB  LYS A  58       8.654  60.582   4.162  1.00 36.06      clus C  
ATOM    429  CG  LYS A  58       7.469  61.454   3.718  1.00 45.80      clus C  
ATOM    430  CD  LYS A  58       7.879  62.873   3.351  1.00 50.66      clus C  
ATOM    431  CE  LYS A  58       8.479  63.590   4.541  1.00 52.86      clus C  
ATOM    432  NZ  LYS A  58       8.807  65.005   4.244  1.00 60.49      clus N1+
ATOM    433  N   CYS A  59       6.506  58.112   3.129  1.00 40.62      clus N  
ATOM    434  CA  CYS A  59       5.865  57.481   1.984  1.00 40.09      clus C  
ATOM    435  C   CYS A  59       4.925  58.436   1.284  1.00 44.06      clus C  
ATOM    436  O   CYS A  59       4.201  59.202   1.926  1.00 41.89      clus O  
ATOM    437  CB  CYS A  59       5.117  56.235   2.437  1.00 45.79      clus C  
ATOM    438  SG  CYS A  59       6.211  54.975   3.152  1.00 36.31      clus S  
ATOM    439  N   ASP A  60       4.923  58.360  -0.040  1.00 48.07      clus N  
ATOM    440  CA  ASP A  60       4.102  59.241  -0.858  1.00 54.32      clus C  
ATOM    441  C   ASP A  60       2.797  58.604  -1.268  1.00 53.42      clus C  
ATOM    442  O   ASP A  60       2.771  57.682  -2.078  1.00 56.21      clus O  
ATOM    443  CB  ASP A  60       4.885  59.669  -2.104  1.00 60.33      clus C  
ATOM    444  CG  ASP A  60       6.284  60.196  -1.770  1.00 68.53      clus C  
ATOM    445  OD1 ASP A  60       6.496  61.426  -1.836  1.00 75.64      clus O  
ATOM    446  OD2 ASP A  60       7.172  59.380  -1.435  1.00 68.89      clus O1-
ATOM    447  N   TRP A  61       1.700  59.097  -0.710  1.00 58.74      clus N  
ATOM    448  CA  TRP A  61       0.405  58.558  -1.077  1.00 62.87      clus C  
ATOM    449  C   TRP A  61       0.034  59.101  -2.451  1.00 63.53      clus C  
ATOM    450  O   TRP A  61      -1.113  59.040  -2.875  1.00 62.38      clus O  
ATOM    451  CB  TRP A  61      -0.673  58.915  -0.055  1.00 66.66      clus C  
ATOM    452  CG  TRP A  61      -1.963  58.291  -0.424  1.00 74.76      clus C  
ATOM    453  CD1 TRP A  61      -2.251  56.955  -0.441  1.00 73.88      clus C  
ATOM    454  CD2 TRP A  61      -3.094  58.951  -0.998  1.00 80.00      clus C  
ATOM    455  CE2 TRP A  61      -4.020  57.950  -1.358  1.00 82.10      clus C  
ATOM    456  CE3 TRP A  61      -3.405  60.294  -1.253  1.00 84.37      clus C  
ATOM    457  NE1 TRP A  61      -3.480  56.741  -1.009  1.00 76.56      clus N  
ATOM    458  CZ2 TRP A  61      -5.242  58.249  -1.969  1.00 82.58      clus C  
ATOM    459  CZ3 TRP A  61      -4.619  60.590  -1.862  1.00 87.24      clus C  
ATOM    460  CH2 TRP A  61      -5.524  59.570  -2.210  1.00 83.59      clus C  
ATOM    461  N   SER A  62       1.029  59.614  -3.159  1.00 70.20      clus N  
ATOM    462  CA  SER A  62       0.833  60.158  -4.493  1.00 74.00      clus C  
ATOM    463  C   SER A  62       0.561  58.995  -5.450  1.00 74.40      clus C  
ATOM    464  O   SER A  62       0.789  59.111  -6.654  1.00 79.56      clus O  
ATOM    465  CB  SER A  62       2.103  60.920  -4.914  1.00 76.00      clus C  
ATOM    466  OG  SER A  62       1.947  61.616  -6.140  1.00 71.65      clus O  
ATOM    467  N   SER A  63       0.058  57.883  -4.907  1.00 76.35      clus N  
ATOM    468  CA  SER A  63      -0.223  56.671  -5.678  1.00 80.53      clus C  
ATOM    469  C   SER A  63       1.015  56.277  -6.474  1.00 81.60      clus C  
ATOM    470  O   SER A  63       0.944  55.651  -7.540  1.00 79.36      clus O  
ATOM    471  CB  SER A  63      -1.452  56.834  -6.576  1.00 84.25      clus C  
ATOM    472  OG  SER A  63      -2.642  56.605  -5.838  1.00 84.00      clus O  
ATOM    473  N   THR A  64       2.145  56.745  -5.961  1.00 79.30      clus N  
ATOM    474  CA  THR A  64       3.451  56.461  -6.510  1.00 82.94      clus C  
ATOM    475  C   THR A  64       3.862  55.291  -5.627  1.00 79.37      clus C  
ATOM    476  O   THR A  64       4.290  54.251  -6.121  1.00 80.75      clus O  
ATOM    477  CB  THR A  64       4.426  57.650  -6.285  1.00 83.01      clus C  
ATOM    478  CG2 THR A  64       5.784  57.361  -6.913  1.00 81.21      clus C  
ATOM    479  OG1 THR A  64       3.879  58.843  -6.865  1.00 86.41      clus O  
ATOM    480  N   ARG A  65       3.627  55.461  -4.323  1.00 79.16      clus N  
ATOM    481  CA  ARG A  65       3.926  54.471  -3.287  1.00 81.56      clus C  
ATOM    482  C   ARG A  65       5.408  54.322  -2.930  1.00 80.47      clus C  
ATOM    483  O   ARG A  65       5.790  53.410  -2.185  1.00 82.42      clus O  
ATOM    484  CB  ARG A  65       3.317  53.109  -3.645  1.00 82.72      clus C  
ATOM    485  CG  ARG A  65       1.791  53.079  -3.629  1.00 84.25      clus C  
ATOM    486  CD  ARG A  65       1.247  51.898  -4.441  1.00 87.74      clus C  
ATOM    487  NE  ARG A  65       1.714  50.595  -3.961  1.00 89.83      clus N  
ATOM    488  CZ  ARG A  65       1.910  49.527  -4.735  1.00 89.65      clus C  
ATOM    489  NH1 ARG A  65       1.686  49.591  -6.043  1.00 86.66      clus N1+
ATOM    490  NH2 ARG A  65       2.323  48.385  -4.192  1.00 86.94      clus N  
ATOM    491  N   ARG A  66       6.241  55.213  -3.464  1.00 76.90      clus N  
ATOM    492  CA  ARG A  66       7.667  55.172  -3.176  1.00 71.99      clus C  
ATOM    493  C   ARG A  66       7.833  55.744  -1.785  1.00 63.20      clus C  
ATOM    494  O   ARG A  66       7.139  56.689  -1.396  1.00 60.83      clus O  
ATOM    495  CB  ARG A  66       8.468  56.027  -4.171  1.00 79.49      clus C  
ATOM    496  CG  ARG A  66      10.005  55.831  -4.102  1.00 85.31      clus C  
ATOM    497  CD  ARG A  66      10.797  57.088  -4.539  1.00 90.20      clus C  
ATOM    498  NE  ARG A  66      10.862  58.093  -3.473  1.00 96.17      clus N  
ATOM    499  CZ  ARG A  66      10.989  59.406  -3.659  1.00 96.45      clus C  
ATOM    500  NH1 ARG A  66      11.069  59.915  -4.884  1.00 99.66      clus N1+
ATOM    501  NH2 ARG A  66      11.031  60.216  -2.609  1.00 93.60      clus N  
ATOM    502  N   CYS A  67       8.726  55.140  -1.021  1.00 51.81      clus N  
ATOM    503  CA  CYS A  67       8.983  55.597   0.328  1.00 47.39      clus C  
ATOM    504  C   CYS A  67      10.467  55.835   0.437  1.00 42.89      clus C  
ATOM    505  O   CYS A  67      11.244  54.915   0.199  1.00 45.64      clus O  
ATOM    506  CB  CYS A  67       8.634  54.501   1.346  1.00 47.58      clus C  
ATOM    507  SG  CYS A  67       6.902  53.967   1.518  1.00 46.98      clus S  
ATOM    508  N   GLN A  68      10.892  57.059   0.702  1.00 41.96      clus N  
ATOM    509  CA  GLN A  68      12.325  57.246   0.892  1.00 38.52      clus C  
ATOM    510  C   GLN A  68      12.547  57.706   2.312  1.00 24.50      clus C  
ATOM    511  O   GLN A  68      11.731  58.456   2.850  1.00 17.09      clus O  
ATOM    512  CB  GLN A  68      12.952  58.195  -0.133  1.00 51.58      clus C  
ATOM    513  CG  GLN A  68      13.446  57.473  -1.390  1.00 70.35      clus C  
ATOM    514  CD  GLN A  68      14.195  56.168  -1.088  1.00 80.62      clus C  
ATOM    515  NE2 GLN A  68      15.468  56.284  -0.720  1.00 84.48      clus N  
ATOM    516  OE1 GLN A  68      13.631  55.072  -1.194  1.00 83.92      clus O  
ATOM    517  N   PRO A  69      13.605  57.203   2.968  1.00 14.45      clus N  
ATOM    518  CA  PRO A  69      13.910  57.578   4.348  1.00 13.32      clus C  
ATOM    519  C   PRO A  69      13.887  59.073   4.624  1.00 11.83      clus C  
ATOM    520  O   PRO A  69      13.879  59.891   3.717  1.00 18.91      clus O  
ATOM    521  CB  PRO A  69      15.307  56.994   4.566  1.00 11.07      clus C  
ATOM    522  CG  PRO A  69      15.856  56.859   3.187  1.00 10.34      clus C  
ATOM    523  CD  PRO A  69      14.671  56.348   2.435  1.00 14.29      clus C  
ATOM    524  N   ILE A  70      13.801  59.409   5.896  1.00 15.15      clus N  
ATOM    525  CA  ILE A  70      13.792  60.784   6.335  1.00 13.64      clus C  
ATOM    526  C   ILE A  70      15.118  60.937   7.067  1.00 19.40      clus C  
ATOM    527  O   ILE A  70      15.448  60.126   7.947  1.00 23.55      clus O  
ATOM    528  CB  ILE A  70      12.591  61.048   7.290  1.00 11.52      clus C  
ATOM    529  CG1 ILE A  70      11.275  60.925   6.521  1.00  8.50      clus C  
ATOM    530  CG2 ILE A  70      12.708  62.414   7.925  1.00 12.60      clus C  
ATOM    531  CD1 ILE A  70      10.059  61.275   7.339  1.00  2.50      clus C  
ATOM    532  N   GLU A  71      15.902  61.936   6.661  1.00 28.34      clus N  
ATOM    533  CA  GLU A  71      17.214  62.203   7.267  1.00 34.88      clus C  
ATOM    534  C   GLU A  71      17.159  62.767   8.678  1.00 30.81      clus C  
ATOM    535  O   GLU A  71      16.766  63.914   8.901  1.00 28.85      clus O  
ATOM    536  CB  GLU A  71      18.075  63.094   6.359  1.00 48.75      clus C  
ATOM    537  CG  GLU A  71      17.337  64.277   5.722  1.00 67.14      clus C  
ATOM    538  CD  GLU A  71      17.070  64.088   4.223  1.00 68.63      clus C  
ATOM    539  OE1 GLU A  71      17.910  64.521   3.405  1.00 69.11      clus O  
ATOM    540  OE2 GLU A  71      16.004  63.526   3.867  1.00 69.04      clus O1-
ATOM    541  N   PHE A  72      17.575  61.948   9.634  1.00 30.42      clus N  
ATOM    542  CA  PHE A  72      17.555  62.386  11.001  1.00 24.68      clus C  
ATOM    543  C   PHE A  72      18.944  62.590  11.543  1.00 26.16      clus C  
ATOM    544  O   PHE A  72      19.306  63.725  11.831  1.00 34.51      clus O  
ATOM    545  CB  PHE A  72      16.718  61.429  11.870  1.00 20.19      clus C  
ATOM    546  CG  PHE A  72      15.267  61.818  11.973  1.00 10.01      clus C  
ATOM    547  CD1 PHE A  72      14.332  61.329  11.063  1.00  8.00      clus C  
ATOM    548  CD2 PHE A  72      14.825  62.665  12.995  1.00  7.38      clus C  
ATOM    549  CE1 PHE A  72      12.980  61.685  11.166  1.00  2.69      clus C  
ATOM    550  CE2 PHE A  72      13.459  63.020  13.098  1.00  2.00      clus C  
ATOM    551  CZ  PHE A  72      12.550  62.526  12.182  1.00  2.00      clus C  
ATOM    552  N   ASP A  73      19.719  61.513  11.688  1.00 19.04      clus N  
ATOM    553  CA  ASP A  73      21.052  61.669  12.271  1.00 15.59      clus C  
ATOM    554  C   ASP A  73      22.000  61.837  11.153  1.00 13.23      clus C  
ATOM    555  O   ASP A  73      22.246  63.002  10.736  1.00 17.05      clus O  
ATOM    556  CB  ASP A  73      21.507  60.459  13.125  1.00 18.07      clus C  
ATOM    557  CG  ASP A  73      22.788  60.750  13.881  1.00 23.08      clus C  
ATOM    558  OD1 ASP A  73      23.806  61.212  13.305  1.00 34.03      clus O  
ATOM    559  OD2 ASP A  73      22.769  60.506  15.094  1.00 25.52      clus O1-
ATOM    560  N   ALA A  74      22.497  60.687  10.639  1.00  7.03      clus N  
ATOM    561  CA  ALA A  74      23.549  60.634   9.579  1.00  3.62      clus C  
ATOM    562  C   ALA A  74      24.803  61.112  10.396  1.00  2.00      clus C  
ATOM    563  O   ALA A  74      24.929  62.322  10.840  1.00  2.00      clus O  
ATOM    564  CB  ALA A  74      23.270  61.623   8.449  1.00  4.24      clus C  
ATOM    565  N   THR A  75      25.632  60.233  10.920  1.00  2.00      clus N  
ATOM    566  CA  THR A  75      26.872  60.679  11.607  1.00  5.76      clus C  
ATOM    567  C   THR A  75      27.597  59.474  12.144  1.00  7.48      clus C  
ATOM    568  O   THR A  75      28.799  59.262  11.817  1.00 15.30      clus O  
ATOM    569  CB  THR A  75      26.930  61.686  12.975  1.00  7.17      clus C  
ATOM    570  CG2 THR A  75      26.533  63.162  12.728  1.00  3.21      clus C  
ATOM    571  OG1 THR A  75      26.275  61.049  14.081  1.00  6.71      clus O  
ATOM    572  N   GLY A  76      26.937  58.669  12.976  1.00 11.22      clus N  
ATOM    573  CA  GLY A  76      27.688  57.543  13.520  1.00 10.94      clus C  
ATOM    574  C   GLY A  76      28.007  57.891  14.988  1.00  6.92      clus C  
ATOM    575  O   GLY A  76      27.560  58.933  15.493  1.00  2.00      clus O  
ATOM    576  N   ASN A  77      28.818  57.084  15.671  1.00  9.52      clus N  
ATOM    577  CA  ASN A  77      29.082  57.318  17.094  1.00 15.29      clus C  
ATOM    578  C   ASN A  77      30.076  58.397  17.507  1.00 13.81      clus C  
ATOM    579  O   ASN A  77      31.189  58.463  16.979  1.00 16.91      clus O  
ATOM    580  CB  ASN A  77      29.491  56.007  17.780  1.00 18.98      clus C  
ATOM    581  CG  ASN A  77      28.474  54.906  17.607  1.00 20.47      clus C  
ATOM    582  ND2 ASN A  77      27.225  55.276  17.365  1.00 20.56      clus N  
ATOM    583  OD1 ASN A  77      28.808  53.731  17.695  1.00 28.25      clus O  
ATOM    584  N   ARG A  78      29.698  59.202  18.497  1.00 14.68      clus N  
ATOM    585  CA  ARG A  78      30.596  60.233  19.010  1.00 11.66      clus C  
ATOM    586  C   ARG A  78      31.543  59.606  20.047  1.00  8.71      clus C  
ATOM    587  O   ARG A  78      31.223  58.587  20.668  1.00 10.04      clus O  
ATOM    588  CB  ARG A  78      29.820  61.347  19.682  1.00  8.92      clus C  
ATOM    589  CG  ARG A  78      28.684  61.887  18.889  1.00  2.19      clus C  
ATOM    590  CD  ARG A  78      28.051  62.941  19.711  1.00  2.00      clus C  
ATOM    591  NE  ARG A  78      26.638  63.091  19.448  1.00  5.52      clus N  
ATOM    592  CZ  ARG A  78      25.731  63.193  20.405  1.00 10.48      clus C  
ATOM    593  NH1 ARG A  78      26.115  63.140  21.660  1.00  2.00      clus N1+
ATOM    594  NH2 ARG A  78      24.458  63.406  20.112  1.00 30.07      clus N  
ATOM    595  N   ASP A  79      32.686  60.244  20.277  1.00  6.46      clus N  
ATOM    596  CA  ASP A  79      33.643  59.713  21.234  1.00  8.96      clus C  
ATOM    597  C   ASP A  79      33.743  60.474  22.542  1.00 12.44      clus C  
ATOM    598  O   ASP A  79      33.376  61.643  22.642  1.00 15.27      clus O  
ATOM    599  CB  ASP A  79      35.037  59.628  20.603  1.00 18.55      clus C  
ATOM    600  CG  ASP A  79      35.108  58.649  19.439  1.00 26.02      clus C  
ATOM    601  OD1 ASP A  79      35.821  57.635  19.583  1.00 34.65      clus O  
ATOM    602  OD2 ASP A  79      34.474  58.902  18.385  1.00 25.83      clus O1-
ATOM    603  N   TYR A  80      34.246  59.774  23.545  1.00 12.84      clus N  
ATOM    604  CA  TYR A  80      34.472  60.323  24.872  1.00 18.85      clus C  
ATOM    605  C   TYR A  80      35.995  60.442  25.010  1.00 21.74      clus C  
ATOM    606  O   TYR A  80      36.509  61.255  25.785  1.00 35.64      clus O  
ATOM    607  CB  TYR A  80      33.891  59.377  25.935  1.00 13.58      clus C  
ATOM    608  CG  TYR A  80      34.444  59.543  27.344  1.00  6.80      clus C  
ATOM    609  CD1 TYR A  80      33.928  60.502  28.208  1.00 10.47      clus C  
ATOM    610  CD2 TYR A  80      35.455  58.708  27.819  1.00  8.72      clus C  
ATOM    611  CE1 TYR A  80      34.396  60.624  29.516  1.00 14.19      clus C  
ATOM    612  CE2 TYR A  80      35.932  58.823  29.123  1.00 13.55      clus C  
ATOM    613  CZ  TYR A  80      35.397  59.782  29.977  1.00 11.10      clus C  
ATOM    614  OH  TYR A  80      35.833  59.880  31.296  1.00  4.96      clus O  
ATOM    615  N   ALA A  81      36.701  59.619  24.239  1.00 20.96      clus N  
ATOM    616  CA  ALA A  81      38.157  59.594  24.218  1.00 29.94      clus C  
ATOM    617  C   ALA A  81      38.562  58.991  22.877  1.00 37.68      clus C  
ATOM    618  O   ALA A  81      37.732  58.910  21.966  1.00 38.45      clus O  
ATOM    619  CB  ALA A  81      38.701  58.761  25.374  1.00 26.80      clus C  
ATOM    620  N   LYS A  82      39.814  58.540  22.772  1.00 47.11      clus N  
ATOM    621  CA  LYS A  82      40.347  57.960  21.536  1.00 60.55      clus C  
ATOM    622  C   LYS A  82      39.529  56.829  20.891  1.00 65.24      clus C  
ATOM    623  O   LYS A  82      38.805  57.058  19.918  1.00 70.03      clus O  
ATOM    624  CB  LYS A  82      41.797  57.526  21.749  1.00 62.76      clus C  
ATOM    625  CG  LYS A  82      42.807  58.644  21.532  1.00 65.15      clus C  
ATOM    626  CD  LYS A  82      42.678  59.215  20.127  1.00 66.99      clus C  
ATOM    627  CE  LYS A  82      43.958  59.900  19.682  1.00 73.44      clus C  
ATOM    628  NZ  LYS A  82      45.095  58.939  19.602  1.00 70.93      clus N1+
ATOM    629  N   ASP A  83      39.702  55.605  21.374  1.00 63.13      clus N  
ATOM    630  CA  ASP A  83      38.949  54.462  20.863  1.00 61.14      clus C  
ATOM    631  C   ASP A  83      38.143  54.040  22.071  1.00 56.27      clus C  
ATOM    632  O   ASP A  83      38.367  52.986  22.676  1.00 55.90      clus O  
ATOM    633  CB  ASP A  83      39.897  53.347  20.435  1.00 68.61      clus C  
ATOM    634  CG  ASP A  83      40.927  53.815  19.432  1.00 72.69      clus C  
ATOM    635  OD1 ASP A  83      40.766  53.511  18.231  1.00 73.40      clus O  
ATOM    636  OD2 ASP A  83      41.895  54.488  19.845  1.00 75.29      clus O1-
ATOM    637  N   ASP A  84      37.224  54.918  22.440  1.00 48.37      clus N  
ATOM    638  CA  ASP A  84      36.401  54.724  23.611  1.00 46.16      clus C  
ATOM    639  C   ASP A  84      35.162  55.545  23.323  1.00 41.60      clus C  
ATOM    640  O   ASP A  84      35.035  56.656  23.818  1.00 42.94      clus O  
ATOM    641  CB  ASP A  84      37.171  55.298  24.804  1.00 45.81      clus C  
ATOM    642  CG  ASP A  84      36.595  54.901  26.131  1.00 54.37      clus C  
ATOM    643  OD1 ASP A  84      36.334  55.813  26.938  1.00 55.38      clus O  
ATOM    644  OD2 ASP A  84      36.446  53.689  26.394  1.00 65.53      clus O1-
ATOM    645  N   PRO A  85      34.270  55.040  22.449  1.00 33.60      clus N  
ATOM    646  CA  PRO A  85      33.025  55.695  22.051  1.00 27.09      clus C  
ATOM    647  C   PRO A  85      32.160  56.205  23.191  1.00 21.38      clus C  
ATOM    648  O   PRO A  85      32.261  55.731  24.330  1.00 22.12      clus O  
ATOM    649  CB  PRO A  85      32.324  54.614  21.243  1.00 31.32      clus C  
ATOM    650  CG  PRO A  85      33.454  53.977  20.541  1.00 35.89      clus C  
ATOM    651  CD  PRO A  85      34.450  53.803  21.671  1.00 39.20      clus C  
ATOM    652  N   LEU A  86      31.343  57.206  22.870  1.00 13.07      clus N  
ATOM    653  CA  LEU A  86      30.441  57.836  23.826  1.00 13.07      clus C  
ATOM    654  C   LEU A  86      29.067  57.177  23.735  1.00 10.84      clus C  
ATOM    655  O   LEU A  86      28.384  56.978  24.747  1.00  6.96      clus O  
ATOM    656  CB  LEU A  86      30.332  59.343  23.516  1.00  6.97      clus C  
ATOM    657  CG  LEU A  86      29.621  60.358  24.428  1.00  2.00      clus C  
ATOM    658  CD1 LEU A  86      28.210  60.596  24.001  1.00  2.00      clus C  
ATOM    659  CD2 LEU A  86      29.689  59.943  25.870  1.00  2.00      clus C  
ATOM    660  N   GLU A  87      28.690  56.811  22.514  1.00  7.05      clus N  
ATOM    661  CA  GLU A  87      27.403  56.190  22.233  1.00  2.84      clus C  
ATOM    662  C   GLU A  87      27.610  55.079  21.192  1.00  8.15      clus C  
ATOM    663  O   GLU A  87      28.648  55.036  20.520  1.00  5.20      clus O  
ATOM    664  CB  GLU A  87      26.459  57.261  21.685  1.00  2.00      clus C  
ATOM    665  CG  GLU A  87      26.996  57.921  20.428  1.00  2.00      clus C  
ATOM    666  CD  GLU A  87      26.359  59.253  20.087  1.00 11.91      clus C  
ATOM    667  OE1 GLU A  87      25.652  59.840  20.931  1.00 13.13      clus O  
ATOM    668  OE2 GLU A  87      26.600  59.730  18.960  1.00 16.00      clus O1-
ATOM    669  N   PHE A  88      26.643  54.161  21.099  1.00  7.76      clus N  
ATOM    670  CA  PHE A  88      26.679  53.050  20.135  1.00  7.09      clus C  
ATOM    671  C   PHE A  88      25.303  52.993  19.493  1.00  8.77      clus C  
ATOM    672  O   PHE A  88      24.329  52.543  20.094  1.00 19.70      clus O  
ATOM    673  CB  PHE A  88      27.005  51.736  20.839  1.00  3.67      clus C  
ATOM    674  CG  PHE A  88      28.045  51.876  21.922  1.00  3.37      clus C  
ATOM    675  CD1 PHE A  88      27.689  52.366  23.180  1.00  2.00      clus C  
ATOM    676  CD2 PHE A  88      29.382  51.556  21.677  1.00  2.00      clus C  
ATOM    677  CE1 PHE A  88      28.642  52.541  24.179  1.00  2.00      clus C  
ATOM    678  CE2 PHE A  88      30.350  51.728  22.670  1.00  2.00      clus C  
ATOM    679  CZ  PHE A  88      29.975  52.223  23.929  1.00  4.60      clus C  
ATOM    680  N   LYS A  89      25.221  53.506  18.280  1.00  8.75      clus N  
ATOM    681  CA  LYS A  89      23.962  53.569  17.578  1.00  9.49      clus C  
ATOM    682  C   LYS A  89      23.559  52.298  16.858  1.00 13.47      clus C  
ATOM    683  O   LYS A  89      22.378  52.103  16.589  1.00 19.06      clus O  
ATOM    684  CB  LYS A  89      23.977  54.748  16.612  1.00 15.54      clus C  
ATOM    685  CG  LYS A  89      24.115  56.097  17.285  1.00  4.98      clus C  
ATOM    686  CD  LYS A  89      24.306  57.190  16.247  1.00 12.64      clus C  
ATOM    687  CE  LYS A  89      24.373  58.546  16.917  1.00 24.99      clus C  
ATOM    688  NZ  LYS A  89      25.092  59.544  16.080  1.00 13.70      clus N1+
ATOM    689  N   SER A  90      24.525  51.442  16.526  1.00 18.30      clus N  
ATOM    690  CA  SER A  90      24.226  50.186  15.832  1.00 16.17      clus C  
ATOM    691  C   SER A  90      23.227  49.351  16.645  1.00 16.80      clus C  
ATOM    692  O   SER A  90      23.412  49.141  17.854  1.00 18.40      clus O  
ATOM    693  CB  SER A  90      25.516  49.405  15.546  1.00 12.39      clus C  
ATOM    694  OG  SER A  90      26.517  49.690  16.516  1.00 32.91      clus O  
ATOM    695  N   HIS A  91      22.137  48.957  15.975  1.00 12.67      clus N  
ATOM    696  CA  HIS A  91      21.037  48.161  16.547  1.00 11.32      clus C  
ATOM    697  C   HIS A  91      20.277  48.944  17.611  1.00  9.22      clus C  
ATOM    698  O   HIS A  91      19.878  48.387  18.643  1.00  8.69      clus O  
ATOM    699  CB  HIS A  91      21.539  46.858  17.189  1.00  7.42      clus C  
ATOM    700  CG  HIS A  91      22.296  45.967  16.265  1.00  2.00      clus C  
ATOM    701  CD2 HIS A  91      23.522  45.406  16.377  1.00  8.01      clus C  
ATOM    702  ND1 HIS A  91      21.786  45.538  15.058  1.00  5.12      clus N  
ATOM    703  CE1 HIS A  91      22.667  44.750  14.468  1.00  8.70      clus C  
ATOM    704  NE2 HIS A  91      23.729  44.654  15.247  1.00  9.65      clus N  
ATOM    705  N   GLN A  92      20.067  50.231  17.365  1.00  4.38      clus N  
ATOM    706  CA  GLN A  92      19.378  51.064  18.337  1.00  8.89      clus C  
ATOM    707  C   GLN A  92      17.868  51.031  18.206  1.00  7.61      clus C  
ATOM    708  O   GLN A  92      17.168  51.520  19.087  1.00 10.92      clus O  
ATOM    709  CB  GLN A  92      19.864  52.497  18.222  1.00  9.84      clus C  
ATOM    710  CG  GLN A  92      19.457  53.144  16.933  1.00  2.06      clus C  
ATOM    711  CD  GLN A  92      20.242  54.395  16.648  1.00 10.49      clus C  
ATOM    712  NE2 GLN A  92      20.569  55.173  17.685  1.00 10.85      clus N  
ATOM    713  OE1 GLN A  92      20.564  54.656  15.501  1.00 21.79      clus O  
ATOM    714  N   TRP A  93      17.367  50.439  17.129  1.00  2.00      clus N  
ATOM    715  CA  TRP A  93      15.933  50.375  16.907  1.00  3.38      clus C  
ATOM    716  C   TRP A  93      15.319  51.756  16.677  1.00  7.67      clus C  
ATOM    717  O   TRP A  93      14.212  52.029  17.141  1.00  9.34      clus O  
ATOM    718  CB  TRP A  93      15.199  49.667  18.064  1.00  2.00      clus C  
ATOM    719  CG  TRP A  93      15.153  48.162  17.963  1.00  6.44      clus C  
ATOM    720  CD1 TRP A  93      16.198  47.291  18.119  1.00 13.11      clus C  
ATOM    721  CD2 TRP A  93      13.998  47.352  17.711  1.00  2.69      clus C  
ATOM    722  CE2 TRP A  93      14.421  46.001  17.737  1.00  3.53      clus C  
ATOM    723  CE3 TRP A  93      12.651  47.635  17.461  1.00  5.72      clus C  
ATOM    724  NE1 TRP A  93      15.766  45.991  17.989  1.00  4.14      clus N  
ATOM    725  CZ2 TRP A  93      13.540  44.938  17.526  1.00  4.99      clus C  
ATOM    726  CZ3 TRP A  93      11.772  46.566  17.247  1.00  6.28      clus C  
ATOM    727  CH2 TRP A  93      12.227  45.239  17.285  1.00  7.11      clus C  
ATOM    728  N   PHE A  94      16.040  52.642  15.996  1.00  7.10      clus N  
ATOM    729  CA  PHE A  94      15.477  53.957  15.699  1.00 13.84      clus C  
ATOM    730  C   PHE A  94      14.256  53.763  14.789  1.00 14.94      clus C  
ATOM    731  O   PHE A  94      14.324  53.073  13.777  1.00 19.29      clus O  
ATOM    732  CB  PHE A  94      16.506  54.875  15.012  1.00 16.24      clus C  
ATOM    733  CG  PHE A  94      15.958  56.241  14.648  1.00 14.17      clus C  
ATOM    734  CD1 PHE A  94      15.499  57.112  15.638  1.00 12.51      clus C  
ATOM    735  CD2 PHE A  94      15.851  56.633  13.317  1.00 10.97      clus C  
ATOM    736  CE1 PHE A  94      14.938  58.343  15.302  1.00 10.61      clus C  
ATOM    737  CE2 PHE A  94      15.289  57.866  12.975  1.00  8.37      clus C  
ATOM    738  CZ  PHE A  94      14.835  58.712  13.965  1.00 10.16      clus C  
ATOM    739  N   GLY A  95      13.141  54.376  15.143  1.00 13.36      clus N  
ATOM    740  CA  GLY A  95      11.961  54.219  14.323  1.00 17.07      clus C  
ATOM    741  C   GLY A  95      10.970  53.282  14.985  1.00 18.33      clus C  
ATOM    742  O   GLY A  95       9.887  53.035  14.460  1.00 20.25      clus O  
ATOM    743  N   ALA A  96      11.345  52.740  16.136  1.00 14.71      clus N  
ATOM    744  CA  ALA A  96      10.465  51.848  16.856  1.00  9.49      clus C  
ATOM    745  C   ALA A  96       9.200  52.610  17.246  1.00  8.99      clus C  
ATOM    746  O   ALA A  96       8.137  52.009  17.378  1.00 13.19      clus O  
ATOM    747  CB  ALA A  96      11.162  51.324  18.084  1.00  6.22      clus C  
ATOM    748  N   SER A  97       9.318  53.933  17.409  1.00  6.13      clus N  
ATOM    749  CA  SER A  97       8.199  54.810  17.798  1.00 13.70      clus C  
ATOM    750  C   SER A  97       8.164  55.977  16.845  1.00 10.18      clus C  
ATOM    751  O   SER A  97       9.211  56.539  16.559  1.00 12.74      clus O  
ATOM    752  CB  SER A  97       8.426  55.368  19.195  1.00  7.09      clus C  
ATOM    753  OG  SER A  97       8.687  54.333  20.118  1.00 11.15      clus O  
ATOM    754  N   VAL A  98       6.983  56.349  16.352  1.00  7.73      clus N  
ATOM    755  CA  VAL A  98       6.870  57.483  15.413  1.00 11.52      clus C  
ATOM    756  C   VAL A  98       5.653  58.345  15.688  1.00 17.78      clus C  
ATOM    757  O   VAL A  98       4.534  57.840  15.696  1.00 23.14      clus O  
ATOM    758  CB  VAL A  98       6.749  57.032  13.951  1.00  3.00      clus C  
ATOM    759  CG1 VAL A  98       6.565  58.245  13.050  1.00  7.20      clus C  
ATOM    760  CG2 VAL A  98       7.960  56.225  13.518  1.00  2.12      clus C  
ATOM    761  N   ARG A  99       5.869  59.651  15.836  1.00 13.78      clus N  
ATOM    762  CA  ARG A  99       4.796  60.603  16.111  1.00 16.78      clus C  
ATOM    763  C   ARG A  99       5.058  61.936  15.433  1.00 20.68      clus C  
ATOM    764  O   ARG A  99       6.103  62.551  15.615  1.00 26.02      clus O  
ATOM    765  CB  ARG A  99       4.619  60.818  17.617  1.00 12.73      clus C  
ATOM    766  CG  ARG A  99       3.714  59.809  18.270  1.00 28.32      clus C  
ATOM    767  CD  ARG A  99       2.312  59.898  17.697  1.00 45.62      clus C  
ATOM    768  NE  ARG A  99       1.447  58.846  18.228  1.00 57.62      clus N  
ATOM    769  CZ  ARG A  99       1.610  57.544  18.000  1.00 56.85      clus C  
ATOM    770  NH1 ARG A  99       2.604  57.103  17.244  1.00 50.01      clus N1+
ATOM    771  NH2 ARG A  99       0.781  56.671  18.548  1.00 58.26      clus N  
ATOM    772  N   SER A 100       4.045  62.403  14.717  1.00 20.63      clus N  
ATOM    773  CA  SER A 100       4.072  63.642  13.955  1.00 14.97      clus C  
ATOM    774  C   SER A 100       2.917  64.534  14.320  1.00 18.52      clus C  
ATOM    775  O   SER A 100       1.792  64.077  14.328  1.00 27.02      clus O  
ATOM    776  CB  SER A 100       3.959  63.304  12.455  1.00 10.27      clus C  
ATOM    777  OG  SER A 100       3.531  64.414  11.706  1.00 13.36      clus O  
ATOM    778  N   LYS A 101       3.193  65.791  14.654  1.00 22.37      clus N  
ATOM    779  CA  LYS A 101       2.131  66.742  14.980  1.00 26.08      clus C  
ATOM    780  C   LYS A 101       1.770  67.461  13.681  1.00 34.20      clus C  
ATOM    781  O   LYS A 101       1.027  66.914  12.857  1.00 45.13      clus O  
ATOM    782  CB  LYS A 101       2.569  67.751  16.041  1.00 21.70      clus C  
ATOM    783  CG  LYS A 101       1.448  68.127  16.994  1.00 20.35      clus C  
ATOM    784  CD  LYS A 101       0.384  68.998  16.360  1.00 22.64      clus C  
ATOM    785  CE  LYS A 101      -0.740  69.274  17.342  1.00 16.09      clus C  
ATOM    786  NZ  LYS A 101      -0.209  69.482  18.726  1.00 14.86      clus N1+
ATOM    787  N   GLN A 102       2.282  68.664  13.468  1.00 31.47      clus N  
ATOM    788  CA  GLN A 102       1.957  69.326  12.221  1.00 32.43      clus C  
ATOM    789  C   GLN A 102       3.227  69.062  11.410  1.00 38.09      clus C  
ATOM    790  O   GLN A 102       3.512  67.911  11.089  1.00 36.58      clus O  
ATOM    791  CB  GLN A 102       1.773  70.850  12.415  1.00 32.68      clus C  
ATOM    792  CG  GLN A 102       1.546  71.299  13.849  1.00 34.94      clus C  
ATOM    793  CD  GLN A 102       0.124  71.730  14.126  1.00 38.73      clus C  
ATOM    794  NE2 GLN A 102      -0.715  71.715  13.093  1.00 44.37      clus N  
ATOM    795  OE1 GLN A 102      -0.226  72.077  15.276  1.00 43.91      clus O  
ATOM    796  N   ASP A 103       4.071  70.081  11.239  1.00 38.14      clus N  
ATOM    797  CA  ASP A 103       5.294  69.919  10.459  1.00 31.56      clus C  
ATOM    798  C   ASP A 103       6.399  69.182  11.206  1.00 30.11      clus C  
ATOM    799  O   ASP A 103       7.376  68.777  10.586  1.00 32.93      clus O  
ATOM    800  CB  ASP A 103       5.842  71.294  10.054  1.00 27.33      clus C  
ATOM    801  CG  ASP A 103       5.019  71.976   8.956  1.00 32.88      clus C  
ATOM    802  OD1 ASP A 103       4.058  72.727   9.274  1.00 31.80      clus O  
ATOM    803  OD2 ASP A 103       5.392  71.824   7.770  1.00 28.97      clus O1-
ATOM    804  N   LYS A 104       6.273  69.100  12.535  1.00 25.31      clus N  
ATOM    805  CA  LYS A 104       7.296  68.477  13.386  1.00 26.66      clus C  
ATOM    806  C   LYS A 104       6.999  67.039  13.700  1.00 22.56      clus C  
ATOM    807  O   LYS A 104       5.864  66.687  13.975  1.00 20.89      clus O  
ATOM    808  CB  LYS A 104       7.494  69.274  14.688  1.00 23.12      clus C  
ATOM    809  CG  LYS A 104       6.292  69.305  15.621  1.00 20.66      clus C  
ATOM    810  CD  LYS A 104       6.312  70.589  16.450  1.00 25.80      clus C  
ATOM    811  CE  LYS A 104       5.905  71.848  15.633  1.00 29.71      clus C  
ATOM    812  NZ  LYS A 104       4.419  72.108  15.437  1.00 12.16      clus N1+
ATOM    813  N   ILE A 105       8.026  66.201  13.615  1.00 18.29      clus N  
ATOM    814  CA  ILE A 105       7.860  64.791  13.886  1.00 12.86      clus C  
ATOM    815  C   ILE A 105       8.961  64.223  14.759  1.00 12.51      clus C  
ATOM    816  O   ILE A 105      10.150  64.406  14.504  1.00  8.60      clus O  
ATOM    817  CB  ILE A 105       7.707  63.967  12.585  1.00 12.28      clus C  
ATOM    818  CG1 ILE A 105       9.027  63.807  11.858  1.00  6.16      clus C  
ATOM    819  CG2 ILE A 105       6.773  64.671  11.621  1.00 18.67      clus C  
ATOM    820  CD1 ILE A 105       8.831  63.200  10.476  1.00  2.72      clus C  
ATOM    821  N   LEU A 106       8.522  63.578  15.833  1.00 10.79      clus N  
ATOM    822  CA  LEU A 106       9.382  62.935  16.824  1.00  3.46      clus C  
ATOM    823  C   LEU A 106       9.591  61.469  16.449  1.00  3.72      clus C  
ATOM    824  O   LEU A 106       8.700  60.833  15.916  1.00  9.51      clus O  
ATOM    825  CB  LEU A 106       8.690  63.036  18.186  1.00  2.00      clus C  
ATOM    826  CG  LEU A 106       9.388  62.580  19.460  1.00  2.00      clus C  
ATOM    827  CD1 LEU A 106      10.864  63.004  19.448  1.00  3.98      clus C  
ATOM    828  CD2 LEU A 106       8.640  63.134  20.666  1.00  2.00      clus C  
ATOM    829  N   ALA A 107      10.796  60.957  16.656  1.00  5.49      clus N  
ATOM    830  CA  ALA A 107      11.102  59.551  16.361  1.00  5.87      clus C  
ATOM    831  C   ALA A 107      12.111  59.080  17.391  1.00  8.29      clus C  
ATOM    832  O   ALA A 107      12.859  59.883  17.933  1.00 12.92      clus O  
ATOM    833  CB  ALA A 107      11.638  59.378  14.975  1.00  2.00      clus C  
ATOM    834  N   CYS A 108      12.153  57.784  17.661  1.00  2.95      clus N  
ATOM    835  CA  CYS A 108      13.051  57.326  18.691  1.00  2.00      clus C  
ATOM    836  C   CYS A 108      13.721  56.012  18.451  1.00  2.00      clus C  
ATOM    837  O   CYS A 108      13.266  55.200  17.662  1.00  7.76      clus O  
ATOM    838  CB  CYS A 108      12.306  57.274  20.013  1.00  2.00      clus C  
ATOM    839  SG  CYS A 108      11.456  58.831  20.453  1.00 15.06      clus S  
ATOM    840  N   ALA A 109      14.816  55.822  19.169  1.00  3.02      clus N  
ATOM    841  CA  ALA A 109      15.625  54.623  19.101  1.00  3.99      clus C  
ATOM    842  C   ALA A 109      15.712  54.148  20.542  1.00  2.77      clus C  
ATOM    843  O   ALA A 109      16.728  54.352  21.217  1.00  2.00      clus O  
ATOM    844  CB  ALA A 109      16.991  54.969  18.572  1.00  2.00      clus C  
ATOM    845  N   PRO A 110      14.656  53.460  21.018  1.00  2.00      clus N  
ATOM    846  CA  PRO A 110      14.573  52.947  22.390  1.00  2.00      clus C  
ATOM    847  C   PRO A 110      15.671  52.009  22.836  1.00  2.00      clus C  
ATOM    848  O   PRO A 110      15.840  51.795  24.029  1.00  2.00      clus O  
ATOM    849  CB  PRO A 110      13.200  52.282  22.433  1.00  2.00      clus C  
ATOM    850  CG  PRO A 110      12.440  52.995  21.349  1.00  5.01      clus C  
ATOM    851  CD  PRO A 110      13.455  53.084  20.257  1.00  2.00      clus C  
ATOM    852  N   LEU A 111      16.410  51.443  21.886  1.00  2.13      clus N  
ATOM    853  CA  LEU A 111      17.504  50.529  22.228  1.00  5.87      clus C  
ATOM    854  C   LEU A 111      18.889  51.147  22.028  1.00  9.98      clus C  
ATOM    855  O   LEU A 111      19.895  50.453  21.870  1.00 16.79      clus O  
ATOM    856  CB  LEU A 111      17.359  49.181  21.500  1.00  5.22      clus C  
ATOM    857  CG  LEU A 111      16.219  48.305  22.054  1.00  2.55      clus C  
ATOM    858  CD1 LEU A 111      16.117  47.020  21.285  1.00  2.00      clus C  
ATOM    859  CD2 LEU A 111      16.449  48.027  23.534  1.00  2.00      clus C  
ATOM    860  N   TYR A 112      18.927  52.471  22.091  1.00 14.88      clus N  
ATOM    861  CA  TYR A 112      20.160  53.224  21.956  1.00 11.97      clus C  
ATOM    862  C   TYR A 112      20.943  53.116  23.265  1.00 10.35      clus C  
ATOM    863  O   TYR A 112      20.409  53.416  24.327  1.00  2.00      clus O  
ATOM    864  CB  TYR A 112      19.805  54.682  21.644  1.00 17.90      clus C  
ATOM    865  CG  TYR A 112      20.895  55.685  21.930  1.00 23.24      clus C  
ATOM    866  CD1 TYR A 112      21.960  55.871  21.044  1.00 20.07      clus C  
ATOM    867  CD2 TYR A 112      20.867  56.445  23.099  1.00 20.00      clus C  
ATOM    868  CE1 TYR A 112      22.959  56.782  21.324  1.00 17.68      clus C  
ATOM    869  CE2 TYR A 112      21.862  57.350  23.385  1.00 18.29      clus C  
ATOM    870  CZ  TYR A 112      22.900  57.517  22.499  1.00 15.73      clus C  
ATOM    871  OH  TYR A 112      23.870  58.438  22.797  1.00 22.70      clus O  
ATOM    872  N   HIS A 113      22.186  52.640  23.182  1.00 11.69      clus N  
ATOM    873  CA  HIS A 113      23.068  52.504  24.359  1.00 17.54      clus C  
ATOM    874  C   HIS A 113      24.066  53.657  24.531  1.00 16.44      clus C  
ATOM    875  O   HIS A 113      24.582  54.201  23.553  1.00 17.83      clus O  
ATOM    876  CB  HIS A 113      23.860  51.205  24.296  1.00 24.17      clus C  
ATOM    877  CG  HIS A 113      23.098  50.015  24.767  1.00 23.09      clus C  
ATOM    878  CD2 HIS A 113      22.966  49.478  25.999  1.00 16.10      clus C  
ATOM    879  ND1 HIS A 113      22.375  49.210  23.915  1.00 19.88      clus N  
ATOM    880  CE1 HIS A 113      21.829  48.228  24.606  1.00 17.49      clus C  
ATOM    881  NE2 HIS A 113      22.172  48.366  25.875  1.00 19.03      clus N  
ATOM    882  N   TRP A 114      24.458  53.910  25.777  1.00 21.01      clus N  
ATOM    883  CA  TRP A 114      25.364  55.018  26.084  1.00 21.68      clus C  
ATOM    884  C   TRP A 114      26.322  54.700  27.223  1.00 20.71      clus C  
ATOM    885  O   TRP A 114      25.907  54.227  28.276  1.00 24.68      clus O  
ATOM    886  CB  TRP A 114      24.501  56.247  26.425  1.00 32.03      clus C  
ATOM    887  CG  TRP A 114      25.174  57.448  27.040  1.00 28.87      clus C  
ATOM    888  CD1 TRP A 114      26.029  58.316  26.427  1.00 26.75      clus C  
ATOM    889  CD2 TRP A 114      24.951  57.966  28.350  1.00 25.38      clus C  
ATOM    890  CE2 TRP A 114      25.697  59.164  28.464  1.00 24.90      clus C  
ATOM    891  CE3 TRP A 114      24.180  57.542  29.443  1.00 27.61      clus C  
ATOM    892  NE1 TRP A 114      26.344  59.354  27.274  1.00 28.22      clus N  
ATOM    893  CZ2 TRP A 114      25.703  59.941  29.622  1.00 29.66      clus C  
ATOM    894  CZ3 TRP A 114      24.183  58.314  30.599  1.00 37.70      clus C  
ATOM    895  CH2 TRP A 114      24.944  59.506  30.678  1.00 40.69      clus C  
ATOM    896  N   ARG A 115      27.608  54.923  26.976  1.00 19.60      clus N  
ATOM    897  CA  ARG A 115      28.664  54.711  27.964  1.00 16.39      clus C  
ATOM    898  C   ARG A 115      28.595  55.903  28.895  1.00 19.78      clus C  
ATOM    899  O   ARG A 115      28.783  57.025  28.453  1.00 34.86      clus O  
ATOM    900  CB  ARG A 115      30.018  54.739  27.271  1.00 15.14      clus C  
ATOM    901  CG  ARG A 115      31.154  54.953  28.223  1.00 20.67      clus C  
ATOM    902  CD  ARG A 115      32.111  56.034  27.759  1.00 11.14      clus C  
ATOM    903  NE  ARG A 115      32.928  56.463  28.895  1.00 16.78      clus N  
ATOM    904  CZ  ARG A 115      34.028  55.844  29.312  1.00 18.48      clus C  
ATOM    905  NH1 ARG A 115      34.470  54.769  28.673  1.00 19.79      clus N1+
ATOM    906  NH2 ARG A 115      34.634  56.247  30.425  1.00 16.00      clus N  
ATOM    907  N   THR A 116      28.361  55.689  30.174  1.00 14.42      clus N  
ATOM    908  CA  THR A 116      28.272  56.824  31.076  1.00 20.61      clus C  
ATOM    909  C   THR A 116      29.493  57.747  31.005  1.00 29.00      clus C  
ATOM    910  O   THR A 116      30.580  57.340  30.582  1.00 36.10      clus O  
ATOM    911  CB  THR A 116      28.106  56.363  32.514  1.00 25.17      clus C  
ATOM    912  CG2 THR A 116      26.898  55.480  32.633  1.00 32.24      clus C  
ATOM    913  OG1 THR A 116      29.266  55.622  32.914  1.00 31.98      clus O  
ATOM    914  N   GLU A 117      29.297  58.997  31.409  1.00 30.41      clus N  
ATOM    915  CA  GLU A 117      30.366  59.985  31.430  1.00 32.80      clus C  
ATOM    916  C   GLU A 117      31.423  59.584  32.461  1.00 36.83      clus C  
ATOM    917  O   GLU A 117      32.488  60.191  32.535  1.00 38.56      clus O  
ATOM    918  CB  GLU A 117      29.800  61.359  31.816  1.00 32.56      clus C  
ATOM    919  CG  GLU A 117      29.018  62.103  30.732  1.00 31.62      clus C  
ATOM    920  CD  GLU A 117      29.912  62.847  29.750  1.00 29.98      clus C  
ATOM    921  OE1 GLU A 117      31.007  62.348  29.427  1.00 29.38      clus O  
ATOM    922  OE2 GLU A 117      29.510  63.931  29.288  1.00 34.27      clus O1-
ATOM    923  N   MET A 118      31.106  58.589  33.284  1.00 39.84      clus N  
ATOM    924  CA  MET A 118      32.027  58.125  34.314  1.00 45.51      clus C  
ATOM    925  C   MET A 118      32.851  56.917  33.884  1.00 46.59      clus C  
ATOM    926  O   MET A 118      33.896  57.071  33.248  1.00 50.07      clus O  
ATOM    927  CB  MET A 118      31.276  57.812  35.610  1.00 47.04      clus C  
ATOM    928  CG  MET A 118      30.572  59.008  36.213  1.00 50.17      clus C  
ATOM    929  SD  MET A 118      29.254  59.624  35.149  1.00 63.03      clus S  
ATOM    930  CE  MET A 118      27.941  59.968  36.376  1.00 54.36      clus C  
ATOM    931  N   LYS A 119      32.383  55.718  34.227  1.00 46.13      clus N  
ATOM    932  CA  LYS A 119      33.109  54.503  33.883  1.00 44.77      clus C  
ATOM    933  C   LYS A 119      32.720  53.950  32.516  1.00 40.18      clus C  
ATOM    934  O   LYS A 119      31.765  54.421  31.894  1.00 35.06      clus O  
ATOM    935  CB  LYS A 119      32.906  53.442  34.961  1.00 50.86      clus C  
ATOM    936  CG  LYS A 119      34.085  52.475  35.111  1.00 58.92      clus C  
ATOM    937  CD  LYS A 119      33.802  51.305  36.068  1.00 60.57      clus C  
ATOM    938  CE  LYS A 119      33.542  51.753  37.504  1.00 60.90      clus C  
ATOM    939  NZ  LYS A 119      32.238  52.464  37.650  1.00 56.36      clus N1+
ATOM    940  N   GLN A 120      33.496  52.973  32.045  1.00 36.89      clus N  
ATOM    941  CA  GLN A 120      33.260  52.333  30.753  1.00 35.11      clus C  
ATOM    942  C   GLN A 120      31.971  51.550  30.856  1.00 31.63      clus C  
ATOM    943  O   GLN A 120      31.962  50.454  31.405  1.00 33.55      clus O  
ATOM    944  CB  GLN A 120      34.397  51.362  30.408  1.00 38.35      clus C  
ATOM    945  CG  GLN A 120      34.867  51.389  28.937  1.00 46.85      clus C  
ATOM    946  CD  GLN A 120      33.746  51.189  27.913  1.00 57.29      clus C  
ATOM    947  NE2 GLN A 120      32.784  50.328  28.237  1.00 54.24      clus N  
ATOM    948  OE1 GLN A 120      33.758  51.797  26.838  1.00 63.69      clus O  
ATOM    949  N   GLU A 121      30.887  52.111  30.333  1.00 28.87      clus N  
ATOM    950  CA  GLU A 121      29.597  51.447  30.397  1.00 27.27      clus C  
ATOM    951  C   GLU A 121      29.034  51.073  29.041  1.00 24.79      clus C  
ATOM    952  O   GLU A 121      29.790  50.776  28.116  1.00 27.10      clus O  
ATOM    953  CB  GLU A 121      28.605  52.325  31.141  1.00 33.00      clus C  
ATOM    954  CG  GLU A 121      27.879  51.577  32.226  1.00 41.72      clus C  
ATOM    955  CD  GLU A 121      28.829  50.983  33.254  1.00 48.88      clus C  
ATOM    956  OE1 GLU A 121      28.524  49.902  33.801  1.00 56.12      clus O  
ATOM    957  OE2 GLU A 121      29.886  51.593  33.518  1.00 46.61      clus O1-
ATOM    958  N   ARG A 122      27.702  51.040  28.963  1.00 19.33      clus N  
ATOM    959  CA  ARG A 122      26.945  50.723  27.748  1.00  9.10      clus C  
ATOM    960  C   ARG A 122      25.462  50.590  28.145  1.00  9.27      clus C  
ATOM    961  O   ARG A 122      24.853  49.542  27.981  1.00  8.68      clus O  
ATOM    962  CB  ARG A 122      27.473  49.431  27.100  1.00  2.00      clus C  
ATOM    963  CG  ARG A 122      26.881  49.178  25.752  1.00  3.30      clus C  
ATOM    964  CD  ARG A 122      27.880  48.731  24.712  1.00  2.00      clus C  
ATOM    965  NE  ARG A 122      27.184  48.570  23.433  1.00  2.55      clus N  
ATOM    966  CZ  ARG A 122      27.742  48.124  22.314  1.00 15.32      clus C  
ATOM    967  NH1 ARG A 122      29.028  47.786  22.284  1.00 21.51      clus N1+
ATOM    968  NH2 ARG A 122      26.996  47.984  21.229  1.00 15.34      clus N  
ATOM    969  N   GLU A 123      24.888  51.678  28.652  1.00  2.45      clus N  
ATOM    970  CA  GLU A 123      23.511  51.681  29.127  1.00  9.07      clus C  
ATOM    971  C   GLU A 123      22.448  52.151  28.136  1.00 11.28      clus C  
ATOM    972  O   GLU A 123      22.514  53.255  27.623  1.00 11.63      clus O  
ATOM    973  CB  GLU A 123      23.440  52.490  30.410  1.00  8.87      clus C  
ATOM    974  CG  GLU A 123      24.483  52.048  31.431  1.00 14.86      clus C  
ATOM    975  CD  GLU A 123      24.506  52.898  32.698  1.00 21.71      clus C  
ATOM    976  OE1 GLU A 123      25.126  52.447  33.689  1.00 11.99      clus O  
ATOM    977  OE2 GLU A 123      23.916  54.009  32.706  1.00 20.78      clus O1-
ATOM    978  N   PRO A 124      21.418  51.308  27.898  1.00 14.92      clus N  
ATOM    979  CA  PRO A 124      20.295  51.549  26.988  1.00 11.07      clus C  
ATOM    980  C   PRO A 124      19.394  52.630  27.502  1.00 17.89      clus C  
ATOM    981  O   PRO A 124      18.264  52.369  27.910  1.00 17.39      clus O  
ATOM    982  CB  PRO A 124      19.576  50.208  26.984  1.00  3.41      clus C  
ATOM    983  CG  PRO A 124      19.776  49.739  28.333  1.00 10.70      clus C  
ATOM    984  CD  PRO A 124      21.228  50.027  28.596  1.00 17.00      clus C  
ATOM    985  N   VAL A 125      19.910  53.851  27.455  1.00 17.05      clus N  
ATOM    986  CA  VAL A 125      19.200  55.027  27.921  1.00  9.90      clus C  
ATOM    987  C   VAL A 125      18.156  55.539  26.916  1.00 10.06      clus C  
ATOM    988  O   VAL A 125      17.233  56.261  27.293  1.00  7.69      clus O  
ATOM    989  CB  VAL A 125      20.222  56.122  28.329  1.00  5.37      clus C  
ATOM    990  CG1 VAL A 125      20.572  57.027  27.172  1.00  6.71      clus C  
ATOM    991  CG2 VAL A 125      19.720  56.883  29.490  1.00 13.24      clus C  
ATOM    992  N   GLY A 126      18.307  55.140  25.651  1.00  8.87      clus N  
ATOM    993  CA  GLY A 126      17.384  55.536  24.596  1.00 12.68      clus C  
ATOM    994  C   GLY A 126      17.347  57.005  24.217  1.00 12.91      clus C  
ATOM    995  O   GLY A 126      17.360  57.879  25.067  1.00 16.76      clus O  
ATOM    996  N   THR A 127      17.216  57.280  22.933  1.00  9.68      clus N  
ATOM    997  CA  THR A 127      17.175  58.658  22.478  1.00  9.89      clus C  
ATOM    998  C   THR A 127      16.178  58.920  21.352  1.00 13.46      clus C  
ATOM    999  O   THR A 127      15.748  58.000  20.664  1.00 19.77      clus O  
ATOM   1000  CB  THR A 127      18.537  59.093  21.976  1.00  5.72      clus C  
ATOM   1001  CG2 THR A 127      18.918  58.282  20.757  1.00  4.07      clus C  
ATOM   1002  OG1 THR A 127      18.484  60.480  21.615  1.00 14.09      clus O  
ATOM   1003  N   CYS A 128      15.850  60.190  21.146  1.00 12.18      clus N  
ATOM   1004  CA  CYS A 128      14.929  60.584  20.098  1.00  8.92      clus C  
ATOM   1005  C   CYS A 128      15.503  61.715  19.269  1.00 10.19      clus C  
ATOM   1006  O   CYS A 128      16.561  62.266  19.570  1.00  8.33      clus O  
ATOM   1007  CB  CYS A 128      13.589  61.035  20.672  1.00  2.00      clus C  
ATOM   1008  SG  CYS A 128      12.750  59.803  21.706  1.00 20.49      clus S  
ATOM   1009  N   PHE A 129      14.763  62.046  18.218  1.00 11.34      clus N  
ATOM   1010  CA  PHE A 129      15.102  63.098  17.281  1.00  7.54      clus C  
ATOM   1011  C   PHE A 129      13.821  63.812  16.879  1.00 16.59      clus C  
ATOM   1012  O   PHE A 129      12.798  63.187  16.579  1.00 16.16      clus O  
ATOM   1013  CB  PHE A 129      15.812  62.527  16.057  1.00  2.11      clus C  
ATOM   1014  CG  PHE A 129      17.232  62.128  16.321  1.00  9.67      clus C  
ATOM   1015  CD1 PHE A 129      17.586  60.800  16.437  1.00  8.29      clus C  
ATOM   1016  CD2 PHE A 129      18.230  63.087  16.450  1.00 17.81      clus C  
ATOM   1017  CE1 PHE A 129      18.914  60.436  16.675  1.00  6.58      clus C  
ATOM   1018  CE2 PHE A 129      19.562  62.718  16.687  1.00  3.56      clus C  
ATOM   1019  CZ  PHE A 129      19.892  61.397  16.797  1.00  2.00      clus C  
ATOM   1020  N   LEU A 130      13.882  65.136  16.927  1.00 25.82      clus N  
ATOM   1021  CA  LEU A 130      12.748  65.961  16.587  1.00 25.22      clus C  
ATOM   1022  C   LEU A 130      13.064  66.856  15.399  1.00 22.55      clus C  
ATOM   1023  O   LEU A 130      13.865  67.788  15.504  1.00 29.03      clus O  
ATOM   1024  CB  LEU A 130      12.340  66.783  17.803  1.00 18.28      clus C  
ATOM   1025  CG  LEU A 130      10.999  67.506  17.678  1.00 15.34      clus C  
ATOM   1026  CD1 LEU A 130       9.958  66.662  16.937  1.00 16.96      clus C  
ATOM   1027  CD2 LEU A 130      10.518  67.865  19.064  1.00 13.29      clus C  
ATOM   1028  N   GLN A 131      12.426  66.554  14.269  1.00 19.23      clus N  
ATOM   1029  CA  GLN A 131      12.622  67.307  13.036  1.00 15.83      clus C  
ATOM   1030  C   GLN A 131      11.479  68.296  12.776  1.00 17.39      clus C  
ATOM   1031  O   GLN A 131      10.409  68.197  13.377  1.00 12.71      clus O  
ATOM   1032  CB  GLN A 131      12.812  66.338  11.854  1.00  9.44      clus C  
ATOM   1033  CG  GLN A 131      13.183  67.000  10.513  1.00 13.76      clus C  
ATOM   1034  CD  GLN A 131      13.928  66.064   9.546  1.00 20.91      clus C  
ATOM   1035  NE2 GLN A 131      13.638  66.197   8.256  1.00 27.59      clus N  
ATOM   1036  OE1 GLN A 131      14.771  65.260   9.954  1.00 17.98      clus O  
ATOM   1037  N   ASP A 132      11.766  69.288  11.933  1.00 24.70      clus N  
ATOM   1038  CA  ASP A 132      10.826  70.335  11.547  1.00 28.12      clus C  
ATOM   1039  C   ASP A 132      11.277  70.887  10.201  1.00 29.32      clus C  
ATOM   1040  O   ASP A 132      11.817  71.984  10.121  1.00 24.31      clus O  
ATOM   1041  CB  ASP A 132      10.810  71.465  12.584  1.00 33.67      clus C  
ATOM   1042  CG  ASP A 132       9.624  72.412  12.404  1.00 39.56      clus C  
ATOM   1043  OD1 ASP A 132       9.353  72.843  11.258  1.00 35.76      clus O  
ATOM   1044  OD2 ASP A 132       8.948  72.717  13.414  1.00 42.30      clus O1-
ATOM   1045  N   GLY A 133      11.097  70.089   9.155  1.00 40.18      clus N  
ATOM   1046  CA  GLY A 133      11.470  70.500   7.811  1.00 42.84      clus C  
ATOM   1047  C   GLY A 133      12.956  70.466   7.552  1.00 45.67      clus C  
ATOM   1048  O   GLY A 133      13.426  69.724   6.689  1.00 41.41      clus O  
ATOM   1049  N   THR A 134      13.685  71.295   8.294  1.00 51.60      clus N  
ATOM   1050  CA  THR A 134      15.138  71.402   8.183  1.00 57.50      clus C  
ATOM   1051  C   THR A 134      15.788  71.316   9.563  1.00 55.90      clus C  
ATOM   1052  O   THR A 134      16.709  70.526   9.780  1.00 58.42      clus O  
ATOM   1053  CB  THR A 134      15.563  72.731   7.491  1.00 64.65      clus C  
ATOM   1054  CG2 THR A 134      15.783  72.516   6.005  1.00 63.12      clus C  
ATOM   1055  OG1 THR A 134      14.560  73.741   7.702  1.00 69.59      clus O  
ATOM   1056  N   LYS A 135      15.287  72.124  10.494  1.00 46.22      clus N  
ATOM   1057  CA  LYS A 135      15.800  72.156  11.857  1.00 43.14      clus C  
ATOM   1058  C   LYS A 135      15.583  70.787  12.524  1.00 39.69      clus C  
ATOM   1059  O   LYS A 135      14.503  70.203  12.440  1.00 40.95      clus O  
ATOM   1060  CB  LYS A 135      15.106  73.291  12.636  1.00 42.36      clus C  
ATOM   1061  CG  LYS A 135      15.513  73.459  14.104  1.00 36.17      clus C  
ATOM   1062  CD  LYS A 135      17.003  73.748  14.300  1.00 45.19      clus C  
ATOM   1063  CE  LYS A 135      17.349  73.872  15.797  1.00 44.92      clus C  
ATOM   1064  NZ  LYS A 135      18.820  73.826  16.105  1.00 47.52      clus N1+
ATOM   1065  N   THR A 136      16.621  70.270  13.172  1.00 35.85      clus N  
ATOM   1066  CA  THR A 136      16.531  68.972  13.820  1.00 27.53      clus C  
ATOM   1067  C   THR A 136      17.354  68.915  15.108  1.00 23.45      clus C  
ATOM   1068  O   THR A 136      18.574  69.080  15.096  1.00 24.01      clus O  
ATOM   1069  CB  THR A 136      16.995  67.864  12.856  1.00 31.06      clus C  
ATOM   1070  CG2 THR A 136      16.606  66.489  13.384  1.00 29.26      clus C  
ATOM   1071  OG1 THR A 136      16.392  68.068  11.572  1.00 21.15      clus O  
ATOM   1072  N   VAL A 137      16.665  68.671  16.213  1.00 18.80      clus N  
ATOM   1073  CA  VAL A 137      17.293  68.578  17.517  1.00 13.26      clus C  
ATOM   1074  C   VAL A 137      17.164  67.145  18.041  1.00 11.58      clus C  
ATOM   1075  O   VAL A 137      16.307  66.412  17.575  1.00 17.93      clus O  
ATOM   1076  CB  VAL A 137      16.591  69.516  18.488  1.00  4.83      clus C  
ATOM   1077  CG1 VAL A 137      16.375  70.834  17.835  1.00  2.00      clus C  
ATOM   1078  CG2 VAL A 137      15.268  68.938  18.928  1.00  8.96      clus C  
ATOM   1079  N   GLU A 138      18.029  66.744  18.973  1.00  2.00      clus N  
ATOM   1080  CA  GLU A 138      17.971  65.415  19.576  1.00  2.00      clus C  
ATOM   1081  C   GLU A 138      17.400  65.500  20.991  1.00 12.97      clus C  
ATOM   1082  O   GLU A 138      17.896  66.253  21.815  1.00 13.88      clus O  
ATOM   1083  CB  GLU A 138      19.350  64.767  19.624  1.00  2.00      clus C  
ATOM   1084  CG  GLU A 138      19.386  63.444  20.404  1.00  4.31      clus C  
ATOM   1085  CD  GLU A 138      20.704  62.671  20.237  1.00 16.75      clus C  
ATOM   1086  OE1 GLU A 138      21.401  62.874  19.216  1.00 31.01      clus O  
ATOM   1087  OE2 GLU A 138      21.046  61.842  21.112  1.00 12.72      clus O1-
ATOM   1088  N   TYR A 139      16.349  64.734  21.264  1.00 12.45      clus N  
ATOM   1089  CA  TYR A 139      15.720  64.721  22.586  1.00  6.19      clus C  
ATOM   1090  C   TYR A 139      16.017  63.392  23.252  1.00  8.29      clus C  
ATOM   1091  O   TYR A 139      15.567  62.364  22.773  1.00 17.96      clus O  
ATOM   1092  CB  TYR A 139      14.216  64.878  22.436  1.00  2.00      clus C  
ATOM   1093  CG  TYR A 139      13.452  64.968  23.734  1.00  2.00      clus C  
ATOM   1094  CD1 TYR A 139      13.863  65.820  24.745  1.00  6.06      clus C  
ATOM   1095  CD2 TYR A 139      12.276  64.241  23.924  1.00  5.56      clus C  
ATOM   1096  CE1 TYR A 139      13.129  65.956  25.900  1.00  6.19      clus C  
ATOM   1097  CE2 TYR A 139      11.539  64.371  25.079  1.00  6.81      clus C  
ATOM   1098  CZ  TYR A 139      11.974  65.237  26.056  1.00  9.07      clus C  
ATOM   1099  OH  TYR A 139      11.232  65.414  27.180  1.00 14.72      clus O  
ATOM   1100  N   ALA A 140      16.786  63.410  24.339  1.00  3.05      clus N  
ATOM   1101  CA  ALA A 140      17.157  62.185  25.068  1.00  2.00      clus C  
ATOM   1102  C   ALA A 140      17.073  62.431  26.572  1.00  7.35      clus C  
ATOM   1103  O   ALA A 140      18.063  62.299  27.296  1.00  2.00      clus O  
ATOM   1104  CB  ALA A 140      18.571  61.740  24.682  1.00  2.00      clus C  
ATOM   1105  N   PRO A 141      15.862  62.716  27.071  1.00  8.62      clus N  
ATOM   1106  CA  PRO A 141      15.600  62.988  28.479  1.00  9.50      clus C  
ATOM   1107  C   PRO A 141      16.154  61.977  29.458  1.00 13.94      clus C  
ATOM   1108  O   PRO A 141      16.222  62.259  30.649  1.00 22.76      clus O  
ATOM   1109  CB  PRO A 141      14.079  63.054  28.531  1.00  3.47      clus C  
ATOM   1110  CG  PRO A 141      13.677  62.150  27.459  1.00  7.84      clus C  
ATOM   1111  CD  PRO A 141      14.587  62.566  26.355  1.00  6.81      clus C  
ATOM   1112  N   CYS A 142      16.549  60.803  28.985  1.00 22.21      clus N  
ATOM   1113  CA  CYS A 142      17.092  59.825  29.918  1.00 25.50      clus C  
ATOM   1114  C   CYS A 142      18.614  59.795  30.020  1.00 22.52      clus C  
ATOM   1115  O   CYS A 142      19.172  59.305  31.004  1.00 24.97      clus O  
ATOM   1116  CB  CYS A 142      16.481  58.444  29.687  1.00 26.12      clus C  
ATOM   1117  SG  CYS A 142      14.950  58.246  30.667  1.00 27.62      clus S  
ATOM   1118  N   ARG A 143      19.284  60.361  29.026  1.00 14.96      clus N  
ATOM   1119  CA  ARG A 143      20.730  60.422  29.030  1.00 11.18      clus C  
ATOM   1120  C   ARG A 143      21.110  61.529  30.016  1.00 19.25      clus C  
ATOM   1121  O   ARG A 143      21.063  62.709  29.664  1.00 23.17      clus O  
ATOM   1122  CB  ARG A 143      21.208  60.748  27.620  1.00  4.40      clus C  
ATOM   1123  CG  ARG A 143      22.694  60.621  27.426  1.00  9.50      clus C  
ATOM   1124  CD  ARG A 143      23.070  60.552  25.953  1.00  3.51      clus C  
ATOM   1125  NE  ARG A 143      22.645  61.741  25.225  1.00  9.16      clus N  
ATOM   1126  CZ  ARG A 143      22.908  61.963  23.945  1.00 12.88      clus C  
ATOM   1127  NH1 ARG A 143      23.592  61.070  23.240  1.00 14.84      clus N1+
ATOM   1128  NH2 ARG A 143      22.515  63.093  23.378  1.00 19.08      clus N  
ATOM   1129  N   SER A 144      21.423  61.159  31.262  1.00 22.71      clus N  
ATOM   1130  CA  SER A 144      21.779  62.159  32.295  1.00 30.14      clus C  
ATOM   1131  C   SER A 144      22.869  61.780  33.315  1.00 33.69      clus C  
ATOM   1132  O   SER A 144      23.376  60.658  33.330  1.00 33.25      clus O  
ATOM   1133  CB  SER A 144      20.521  62.627  33.063  1.00 30.82      clus C  
ATOM   1134  OG  SER A 144      20.061  61.661  34.007  1.00 18.58      clus O  
ATOM   1135  N   GLN A 145      23.210  62.736  34.176  1.00 34.84      clus N  
ATOM   1136  CA  GLN A 145      24.212  62.519  35.210  1.00 39.38      clus C  
ATOM   1137  C   GLN A 145      23.715  61.445  36.179  1.00 33.93      clus C  
ATOM   1138  O   GLN A 145      24.491  60.845  36.924  1.00 29.55      clus O  
ATOM   1139  CB  GLN A 145      24.485  63.832  35.952  1.00 47.90      clus C  
ATOM   1140  CG  GLN A 145      25.858  64.446  35.694  1.00 49.36      clus C  
ATOM   1141  CD  GLN A 145      26.013  64.985  34.292  1.00 50.33      clus C  
ATOM   1142  NE2 GLN A 145      25.302  66.071  33.999  1.00 51.14      clus N  
ATOM   1143  OE1 GLN A 145      26.779  64.445  33.481  1.00 47.89      clus O  
ATOM   1144  N   ASP A 146      22.401  61.254  36.183  1.00 34.17      clus N  
ATOM   1145  CA  ASP A 146      21.732  60.253  37.003  1.00 38.26      clus C  
ATOM   1146  C   ASP A 146      21.802  58.930  36.215  1.00 36.38      clus C  
ATOM   1147  O   ASP A 146      20.964  58.660  35.339  1.00 37.43      clus O  
ATOM   1148  CB  ASP A 146      20.278  60.684  37.210  1.00 43.78      clus C  
ATOM   1149  CG  ASP A 146      19.469  59.684  38.009  1.00 42.18      clus C  
ATOM   1150  OD1 ASP A 146      20.038  58.694  38.510  1.00 46.12      clus O  
ATOM   1151  OD2 ASP A 146      18.253  59.901  38.149  1.00 38.83      clus O1-
ATOM   1152  N   ILE A 147      22.765  58.085  36.563  1.00 27.45      clus N  
ATOM   1153  CA  ILE A 147      22.945  56.849  35.824  1.00 17.92      clus C  
ATOM   1154  C   ILE A 147      22.698  55.541  36.533  1.00 25.40      clus C  
ATOM   1155  O   ILE A 147      22.115  55.479  37.619  1.00 25.13      clus O  
ATOM   1156  CB  ILE A 147      24.353  56.761  35.270  1.00  8.52      clus C  
ATOM   1157  CG1 ILE A 147      25.351  56.772  36.434  1.00  3.09      clus C  
ATOM   1158  CG2 ILE A 147      24.582  57.868  34.260  1.00  3.79      clus C  
ATOM   1159  CD1 ILE A 147      26.718  56.334  36.042  1.00  2.00      clus C  
ATOM   1160  N   ASP A 148      23.189  54.489  35.884  1.00 21.65      clus N  
ATOM   1161  CA  ASP A 148      23.084  53.129  36.372  1.00 24.45      clus C  
ATOM   1162  C   ASP A 148      21.633  52.674  36.478  1.00 24.28      clus C  
ATOM   1163  O   ASP A 148      20.692  53.466  36.315  1.00 23.31      clus O  
ATOM   1164  CB  ASP A 148      23.822  52.973  37.715  1.00 29.80      clus C  
ATOM   1165  CG  ASP A 148      25.340  52.788  37.546  1.00 23.65      clus C  
ATOM   1166  OD1 ASP A 148      26.021  52.538  38.566  1.00 24.41      clus O  
ATOM   1167  OD2 ASP A 148      25.847  52.856  36.401  1.00 16.03      clus O1-
ATOM   1168  N   ALA A 149      21.465  51.382  36.735  1.00 23.84      clus N  
ATOM   1169  CA  ALA A 149      20.151  50.778  36.853  1.00 25.17      clus C  
ATOM   1170  C   ALA A 149      19.504  51.129  38.182  1.00 27.64      clus C  
ATOM   1171  O   ALA A 149      18.904  50.293  38.832  1.00 25.39      clus O  
ATOM   1172  CB  ALA A 149      20.281  49.273  36.718  1.00 26.83      clus C  
ATOM   1173  N   ASP A 150      19.628  52.372  38.589  1.00 29.44      clus N  
ATOM   1174  CA  ASP A 150      19.077  52.815  39.850  1.00 32.17      clus C  
ATOM   1175  C   ASP A 150      18.430  54.116  39.455  1.00 28.73      clus C  
ATOM   1176  O   ASP A 150      17.373  54.498  39.953  1.00 25.72      clus O  
ATOM   1177  CB  ASP A 150      20.236  53.029  40.820  1.00 44.52      clus C  
ATOM   1178  CG  ASP A 150      19.799  53.609  42.141  1.00 51.45      clus C  
ATOM   1179  OD1 ASP A 150      20.542  54.471  42.659  1.00 57.66      clus O  
ATOM   1180  OD2 ASP A 150      18.732  53.202  42.658  1.00 51.56      clus O1-
ATOM   1181  N   GLY A 151      19.080  54.762  38.499  1.00 26.93      clus N  
ATOM   1182  CA  GLY A 151      18.585  55.995  37.957  1.00 20.43      clus C  
ATOM   1183  C   GLY A 151      18.033  55.611  36.617  1.00 15.92      clus C  
ATOM   1184  O   GLY A 151      17.581  54.490  36.428  1.00 21.45      clus O  
ATOM   1185  N   GLN A 152      18.218  56.495  35.652  1.00 14.38      clus N  
ATOM   1186  CA  GLN A 152      17.695  56.293  34.315  1.00 13.21      clus C  
ATOM   1187  C   GLN A 152      18.681  55.624  33.378  1.00  7.90      clus C  
ATOM   1188  O   GLN A 152      18.682  55.884  32.182  1.00  2.00      clus O  
ATOM   1189  CB  GLN A 152      17.263  57.645  33.748  1.00 20.44      clus C  
ATOM   1190  CG  GLN A 152      16.597  58.559  34.779  1.00 23.32      clus C  
ATOM   1191  CD  GLN A 152      16.461  59.980  34.288  1.00 31.89      clus C  
ATOM   1192  NE2 GLN A 152      17.467  60.805  34.570  1.00 31.44      clus N  
ATOM   1193  OE1 GLN A 152      15.471  60.334  33.649  1.00 29.23      clus O  
ATOM   1194  N   GLY A 153      19.498  54.730  33.908  1.00  9.71      clus N  
ATOM   1195  CA  GLY A 153      20.466  54.065  33.055  1.00 14.66      clus C  
ATOM   1196  C   GLY A 153      19.877  53.178  31.968  1.00 15.89      clus C  
ATOM   1197  O   GLY A 153      20.355  53.171  30.823  1.00 13.79      clus O  
ATOM   1198  N   PHE A 154      18.842  52.421  32.330  1.00 15.30      clus N  
ATOM   1199  CA  PHE A 154      18.196  51.492  31.407  1.00 11.68      clus C  
ATOM   1200  C   PHE A 154      16.795  51.917  31.064  1.00 13.67      clus C  
ATOM   1201  O   PHE A 154      15.957  51.106  30.675  1.00 19.16      clus O  
ATOM   1202  CB  PHE A 154      18.194  50.089  32.005  1.00  6.77      clus C  
ATOM   1203  CG  PHE A 154      19.568  49.539  32.205  1.00  2.00      clus C  
ATOM   1204  CD1 PHE A 154      20.363  49.996  33.240  1.00  2.00      clus C  
ATOM   1205  CD2 PHE A 154      20.092  48.613  31.320  1.00  2.00      clus C  
ATOM   1206  CE1 PHE A 154      21.658  49.545  33.384  1.00  2.00      clus C  
ATOM   1207  CE2 PHE A 154      21.392  48.156  31.454  1.00  3.55      clus C  
ATOM   1208  CZ  PHE A 154      22.176  48.623  32.490  1.00  2.00      clus C  
ATOM   1209  N   CYS A 155      16.589  53.222  31.138  1.00 11.72      clus N  
ATOM   1210  CA  CYS A 155      15.312  53.840  30.879  1.00  7.06      clus C  
ATOM   1211  C   CYS A 155      14.670  53.531  29.530  1.00  5.88      clus C  
ATOM   1212  O   CYS A 155      13.458  53.302  29.459  1.00  5.01      clus O  
ATOM   1213  CB  CYS A 155      15.452  55.339  31.101  1.00 15.46      clus C  
ATOM   1214  SG  CYS A 155      14.291  56.395  30.193  1.00 31.50      clus S  
ATOM   1215  N   GLN A 156      15.471  53.471  28.471  1.00  2.00      clus N  
ATOM   1216  CA  GLN A 156      14.933  53.206  27.136  1.00  5.74      clus C  
ATOM   1217  C   GLN A 156      13.778  54.136  26.854  1.00  6.55      clus C  
ATOM   1218  O   GLN A 156      12.755  53.708  26.331  1.00  8.22      clus O  
ATOM   1219  CB  GLN A 156      14.446  51.765  26.994  1.00  2.00      clus C  
ATOM   1220  CG  GLN A 156      15.558  50.767  26.883  1.00  7.36      clus C  
ATOM   1221  CD  GLN A 156      15.063  49.362  26.668  1.00  5.80      clus C  
ATOM   1222  NE2 GLN A 156      15.363  48.487  27.613  1.00  5.33      clus N  
ATOM   1223  OE1 GLN A 156      14.430  49.058  25.658  1.00  2.00      clus O  
ATOM   1224  N   GLY A 157      13.916  55.393  27.271  1.00  2.26      clus N  
ATOM   1225  CA  GLY A 157      12.874  56.367  27.042  1.00  2.00      clus C  
ATOM   1226  C   GLY A 157      12.677  56.422  25.553  1.00  2.00      clus C  
ATOM   1227  O   GLY A 157      13.626  56.226  24.802  1.00  7.81      clus O  
ATOM   1228  N   GLY A 158      11.448  56.639  25.115  1.00  2.00      clus N  
ATOM   1229  CA  GLY A 158      11.198  56.695  23.690  1.00  2.00      clus C  
ATOM   1230  C   GLY A 158      10.522  55.431  23.240  1.00  7.73      clus C  
ATOM   1231  O   GLY A 158      10.076  55.344  22.099  1.00 11.71      clus O  
ATOM   1232  N   PHE A 159      10.455  54.458  24.153  1.00  8.23      clus N  
ATOM   1233  CA  PHE A 159       9.814  53.156  23.937  1.00  4.07      clus C  
ATOM   1234  C   PHE A 159       8.378  53.388  23.443  1.00  2.75      clus C  
ATOM   1235  O   PHE A 159       7.868  52.638  22.616  1.00  5.85      clus O  
ATOM   1236  CB  PHE A 159       9.802  52.379  25.256  1.00 10.92      clus C  
ATOM   1237  CG  PHE A 159       9.445  50.940  25.101  1.00  9.22      clus C  
ATOM   1238  CD1 PHE A 159      10.414  50.016  24.734  1.00  8.22      clus C  
ATOM   1239  CD2 PHE A 159       8.126  50.521  25.251  1.00  9.75      clus C  
ATOM   1240  CE1 PHE A 159      10.075  48.712  24.511  1.00 13.45      clus C  
ATOM   1241  CE2 PHE A 159       7.770  49.226  25.032  1.00  2.00      clus C  
ATOM   1242  CZ  PHE A 159       8.741  48.313  24.658  1.00 11.54      clus C  
ATOM   1243  N   SER A 160       7.758  54.453  23.955  1.00  2.32      clus N  
ATOM   1244  CA  SER A 160       6.413  54.882  23.581  1.00  7.66      clus C  
ATOM   1245  C   SER A 160       6.380  56.408  23.694  1.00 12.17      clus C  
ATOM   1246  O   SER A 160       6.923  56.973  24.640  1.00 15.18      clus O  
ATOM   1247  CB  SER A 160       5.371  54.284  24.525  1.00 12.91      clus C  
ATOM   1248  OG  SER A 160       5.443  54.865  25.814  1.00  2.18      clus O  
ATOM   1249  N   ILE A 161       5.748  57.078  22.741  1.00 15.18      clus N  
ATOM   1250  CA  ILE A 161       5.675  58.535  22.788  1.00 12.48      clus C  
ATOM   1251  C   ILE A 161       4.344  59.073  22.277  1.00 14.24      clus C  
ATOM   1252  O   ILE A 161       3.549  58.340  21.684  1.00 14.59      clus O  
ATOM   1253  CB  ILE A 161       6.791  59.175  21.945  1.00 14.17      clus C  
ATOM   1254  CG1 ILE A 161       6.860  58.502  20.575  1.00 14.83      clus C  
ATOM   1255  CG2 ILE A 161       8.125  59.129  22.672  1.00 18.78      clus C  
ATOM   1256  CD1 ILE A 161       8.035  58.937  19.719  1.00 12.75      clus C  
ATOM   1257  N   ASP A 162       4.117  60.366  22.501  1.00 23.05      clus N  
ATOM   1258  CA  ASP A 162       2.897  61.042  22.050  1.00 21.05      clus C  
ATOM   1259  C   ASP A 162       2.960  62.570  22.243  1.00 15.47      clus C  
ATOM   1260  O   ASP A 162       3.691  63.053  23.109  1.00 10.00      clus O  
ATOM   1261  CB  ASP A 162       1.681  60.472  22.787  1.00 23.32      clus C  
ATOM   1262  CG  ASP A 162       0.600  59.970  21.845  1.00 29.16      clus C  
ATOM   1263  OD1 ASP A 162      -0.266  59.198  22.310  1.00 39.11      clus O  
ATOM   1264  OD2 ASP A 162       0.613  60.342  20.648  1.00 32.05      clus O1-
ATOM   1265  N   PHE A 163       2.236  63.315  21.401  1.00  9.74      clus N  
ATOM   1266  CA  PHE A 163       2.163  64.789  21.478  1.00  9.58      clus C  
ATOM   1267  C   PHE A 163       0.833  65.210  22.103  1.00 13.66      clus C  
ATOM   1268  O   PHE A 163      -0.219  64.669  21.742  1.00 18.31      clus O  
ATOM   1269  CB  PHE A 163       2.173  65.441  20.083  1.00  5.07      clus C  
ATOM   1270  CG  PHE A 163       3.510  65.436  19.379  1.00  8.45      clus C  
ATOM   1271  CD1 PHE A 163       3.674  64.733  18.185  1.00  5.38      clus C  
ATOM   1272  CD2 PHE A 163       4.569  66.201  19.848  1.00  8.50      clus C  
ATOM   1273  CE1 PHE A 163       4.863  64.794  17.464  1.00  2.43      clus C  
ATOM   1274  CE2 PHE A 163       5.764  66.267  19.129  1.00 10.32      clus C  
ATOM   1275  CZ  PHE A 163       5.905  65.558  17.929  1.00 11.29      clus C  
ATOM   1276  N   THR A 164       0.861  66.179  23.016  1.00 15.13      clus N  
ATOM   1277  CA  THR A 164      -0.393  66.671  23.589  1.00 16.76      clus C  
ATOM   1278  C   THR A 164      -0.921  67.744  22.628  1.00 20.23      clus C  
ATOM   1279  O   THR A 164      -0.173  68.230  21.749  1.00 13.08      clus O  
ATOM   1280  CB  THR A 164      -0.245  67.277  25.015  1.00 12.96      clus C  
ATOM   1281  CG2 THR A 164       0.379  66.282  25.949  1.00 19.64      clus C  
ATOM   1282  OG1 THR A 164       0.566  68.454  24.978  1.00 15.54      clus O  
ATOM   1283  N   LYS A 165      -2.202  68.090  22.785  1.00 23.73      clus N  
ATOM   1284  CA  LYS A 165      -2.868  69.084  21.938  1.00 19.56      clus C  
ATOM   1285  C   LYS A 165      -2.083  70.375  21.833  1.00 16.83      clus C  
ATOM   1286  O   LYS A 165      -1.884  70.901  20.745  1.00 16.45      clus O  
ATOM   1287  CB  LYS A 165      -4.243  69.404  22.504  1.00 24.48      clus C  
ATOM   1288  CG  LYS A 165      -5.055  70.346  21.641  1.00 34.78      clus C  
ATOM   1289  CD  LYS A 165      -6.382  70.636  22.309  1.00 42.75      clus C  
ATOM   1290  CE  LYS A 165      -7.400  71.138  21.307  1.00 49.54      clus C  
ATOM   1291  NZ  LYS A 165      -8.772  71.131  21.888  1.00 54.94      clus N1+
ATOM   1292  N   ALA A 166      -1.676  70.890  22.988  1.00 14.90      clus N  
ATOM   1293  CA  ALA A 166      -0.916  72.121  23.078  1.00  3.84      clus C  
ATOM   1294  C   ALA A 166       0.571  71.811  23.085  1.00  7.29      clus C  
ATOM   1295  O   ALA A 166       1.250  72.066  24.078  1.00  8.40      clus O  
ATOM   1296  CB  ALA A 166      -1.299  72.859  24.349  1.00 12.36      clus C  
ATOM   1297  N   ASP A 167       1.057  71.245  21.980  1.00  9.68      clus N  
ATOM   1298  CA  ASP A 167       2.463  70.858  21.796  1.00 15.09      clus C  
ATOM   1299  C   ASP A 167       3.345  70.633  23.017  1.00 18.98      clus C  
ATOM   1300  O   ASP A 167       4.026  71.536  23.505  1.00 23.45      clus O  
ATOM   1301  CB  ASP A 167       3.167  71.777  20.805  1.00 32.41      clus C  
ATOM   1302  CG  ASP A 167       3.383  71.112  19.449  1.00 52.40      clus C  
ATOM   1303  OD1 ASP A 167       2.590  70.212  19.086  1.00 56.11      clus O  
ATOM   1304  OD2 ASP A 167       4.351  71.482  18.748  1.00 66.25      clus O1-
ATOM   1305  N   ARG A 168       3.332  69.394  23.482  1.00 17.38      clus N  
ATOM   1306  CA  ARG A 168       4.111  68.961  24.622  1.00 15.80      clus C  
ATOM   1307  C   ARG A 168       4.264  67.481  24.314  1.00 13.89      clus C  
ATOM   1308  O   ARG A 168       3.411  66.912  23.635  1.00 16.09      clus O  
ATOM   1309  CB  ARG A 168       3.312  69.180  25.898  1.00 11.94      clus C  
ATOM   1310  CG  ARG A 168       4.153  69.276  27.137  1.00  9.77      clus C  
ATOM   1311  CD  ARG A 168       3.279  69.398  28.393  1.00  9.95      clus C  
ATOM   1312  NE  ARG A 168       3.785  70.383  29.356  1.00 10.67      clus N  
ATOM   1313  CZ  ARG A 168       5.025  70.406  29.839  1.00 11.57      clus C  
ATOM   1314  NH1 ARG A 168       5.912  69.495  29.465  1.00  9.28      clus N1+
ATOM   1315  NH2 ARG A 168       5.393  71.372  30.671  1.00 17.55      clus N  
ATOM   1316  N   VAL A 169       5.367  66.866  24.719  1.00  7.66      clus N  
ATOM   1317  CA  VAL A 169       5.533  65.449  24.413  1.00  4.87      clus C  
ATOM   1318  C   VAL A 169       5.460  64.560  25.629  1.00  6.42      clus C  
ATOM   1319  O   VAL A 169       6.050  64.863  26.669  1.00  2.10      clus O  
ATOM   1320  CB  VAL A 169       6.859  65.119  23.636  1.00  2.00      clus C  
ATOM   1321  CG1 VAL A 169       7.259  66.263  22.745  1.00  2.00      clus C  
ATOM   1322  CG2 VAL A 169       7.986  64.734  24.579  1.00  2.00      clus C  
ATOM   1323  N   LEU A 170       4.667  63.499  25.510  1.00 10.81      clus N  
ATOM   1324  CA  LEU A 170       4.573  62.511  26.565  1.00  7.98      clus C  
ATOM   1325  C   LEU A 170       5.476  61.424  26.014  1.00 13.43      clus C  
ATOM   1326  O   LEU A 170       5.324  60.966  24.873  1.00 14.98      clus O  
ATOM   1327  CB  LEU A 170       3.167  61.959  26.730  1.00  2.00      clus C  
ATOM   1328  CG  LEU A 170       2.793  61.624  28.177  1.00  2.00      clus C  
ATOM   1329  CD1 LEU A 170       1.718  60.553  28.212  1.00  2.00      clus C  
ATOM   1330  CD2 LEU A 170       4.010  61.194  28.963  1.00  6.51      clus C  
ATOM   1331  N   LEU A 171       6.490  61.103  26.793  1.00 10.90      clus N  
ATOM   1332  CA  LEU A 171       7.445  60.098  26.400  1.00  5.82      clus C  
ATOM   1333  C   LEU A 171       7.466  59.122  27.539  1.00 10.37      clus C  
ATOM   1334  O   LEU A 171       7.197  59.499  28.680  1.00 17.54      clus O  
ATOM   1335  CB  LEU A 171       8.815  60.739  26.205  1.00  2.00      clus C  
ATOM   1336  CG  LEU A 171      10.009  59.827  25.960  1.00  2.00      clus C  
ATOM   1337  CD1 LEU A 171      10.964  60.483  24.980  1.00  6.69      clus C  
ATOM   1338  CD2 LEU A 171      10.691  59.509  27.267  1.00  2.00      clus C  
ATOM   1339  N   GLY A 172       7.744  57.862  27.226  1.00  5.81      clus N  
ATOM   1340  CA  GLY A 172       7.782  56.852  28.259  1.00  2.00      clus C  
ATOM   1341  C   GLY A 172       9.041  56.046  28.131  1.00  4.22      clus C  
ATOM   1342  O   GLY A 172       9.570  55.885  27.029  1.00  8.28      clus O  
ATOM   1343  N   GLY A 173       9.524  55.562  29.270  1.00  8.09      clus N  
ATOM   1344  CA  GLY A 173      10.726  54.749  29.313  1.00 14.16      clus C  
ATOM   1345  C   GLY A 173      10.535  53.724  30.413  1.00 20.63      clus C  
ATOM   1346  O   GLY A 173      10.457  54.089  31.592  1.00 22.53      clus O  
ATOM   1347  N   PRO A 174      10.411  52.434  30.057  1.00 20.18      clus N  
ATOM   1348  CA  PRO A 174      10.215  51.367  31.035  1.00 11.93      clus C  
ATOM   1349  C   PRO A 174      11.315  51.087  32.058  1.00 14.95      clus C  
ATOM   1350  O   PRO A 174      11.025  50.995  33.241  1.00 27.00      clus O  
ATOM   1351  CB  PRO A 174       9.938  50.156  30.150  1.00  8.78      clus C  
ATOM   1352  CG  PRO A 174       9.299  50.759  28.945  1.00 12.98      clus C  
ATOM   1353  CD  PRO A 174      10.199  51.922  28.694  1.00 13.27      clus C  
ATOM   1354  N   GLY A 175      12.574  51.023  31.636  1.00  9.20      clus N  
ATOM   1355  CA  GLY A 175      13.652  50.679  32.566  1.00  5.77      clus C  
ATOM   1356  C   GLY A 175      14.216  51.603  33.637  1.00  5.81      clus C  
ATOM   1357  O   GLY A 175      15.204  51.257  34.308  1.00  5.61      clus O  
ATOM   1358  N   SER A 176      13.609  52.770  33.805  1.00 11.98      clus N  
ATOM   1359  CA  SER A 176      14.074  53.730  34.793  1.00 11.97      clus C  
ATOM   1360  C   SER A 176      14.083  53.125  36.161  1.00 12.26      clus C  
ATOM   1361  O   SER A 176      13.179  52.366  36.531  1.00 14.12      clus O  
ATOM   1362  CB  SER A 176      13.212  54.985  34.805  1.00 13.17      clus C  
ATOM   1363  OG  SER A 176      13.530  55.813  33.702  1.00 23.72      clus O  
ATOM   1364  N   PHE A 177      15.127  53.475  36.906  1.00 12.37      clus N  
ATOM   1365  CA  PHE A 177      15.312  52.993  38.265  1.00 12.75      clus C  
ATOM   1366  C   PHE A 177      15.489  51.497  38.101  1.00 15.70      clus C  
ATOM   1367  O   PHE A 177      16.388  51.077  37.344  1.00 30.74      clus O  
ATOM   1368  CB  PHE A 177      14.104  53.422  39.095  1.00  9.24      clus C  
ATOM   1369  CG  PHE A 177      13.665  54.833  38.771  1.00 11.77      clus C  
ATOM   1370  CD1 PHE A 177      12.345  55.118  38.452  1.00 17.35      clus C  
ATOM   1371  CD2 PHE A 177      14.619  55.856  38.641  1.00 11.10      clus C  
ATOM   1372  CE1 PHE A 177      11.984  56.395  37.997  1.00 20.51      clus C  
ATOM   1373  CE2 PHE A 177      14.265  57.128  38.191  1.00  5.27      clus C  
ATOM   1374  CZ  PHE A 177      12.954  57.397  37.868  1.00  7.84      clus C  
ATOM   1375  N   TYR A 178      14.674  50.679  38.751  1.00  2.74      clus N  
ATOM   1376  CA  TYR A 178      14.865  49.262  38.533  1.00  5.55      clus C  
ATOM   1377  C   TYR A 178      13.678  48.683  37.777  1.00 11.82      clus C  
ATOM   1378  O   TYR A 178      12.984  47.790  38.245  1.00 20.72      clus O  
ATOM   1379  CB  TYR A 178      15.145  48.540  39.842  1.00  5.27      clus C  
ATOM   1380  CG  TYR A 178      16.613  48.445  40.207  1.00  2.00      clus C  
ATOM   1381  CD1 TYR A 178      17.476  47.611  39.493  1.00  3.93      clus C  
ATOM   1382  CD2 TYR A 178      17.128  49.144  41.300  1.00  3.10      clus C  
ATOM   1383  CE1 TYR A 178      18.818  47.471  39.862  1.00  2.00      clus C  
ATOM   1384  CE2 TYR A 178      18.453  49.021  41.688  1.00  2.00      clus C  
ATOM   1385  CZ  TYR A 178      19.298  48.180  40.966  1.00  6.02      clus C  
ATOM   1386  OH  TYR A 178      20.620  48.045  41.343  1.00 20.21      clus O  
ATOM   1387  N   TRP A 179      13.488  49.194  36.569  1.00  6.55      clus N  
ATOM   1388  CA  TRP A 179      12.404  48.800  35.690  1.00  2.00      clus C  
ATOM   1389  C   TRP A 179      11.051  49.178  36.238  1.00  3.20      clus C  
ATOM   1390  O   TRP A 179      10.030  48.564  35.929  1.00  2.00      clus O  
ATOM   1391  CB  TRP A 179      12.486  47.332  35.336  1.00  2.00      clus C  
ATOM   1392  CG  TRP A 179      13.615  47.103  34.474  1.00 12.10      clus C  
ATOM   1393  CD1 TRP A 179      13.637  47.187  33.117  1.00 11.70      clus C  
ATOM   1394  CD2 TRP A 179      14.953  46.860  34.893  1.00 17.16      clus C  
ATOM   1395  CE2 TRP A 179      15.749  46.812  33.733  1.00 19.52      clus C  
ATOM   1396  CE3 TRP A 179      15.562  46.666  36.136  1.00 18.76      clus C  
ATOM   1397  NE1 TRP A 179      14.920  47.021  32.660  1.00 20.90      clus N  
ATOM   1398  CZ2 TRP A 179      17.129  46.590  33.783  1.00 17.29      clus C  
ATOM   1399  CZ3 TRP A 179      16.931  46.443  36.181  1.00 18.72      clus C  
ATOM   1400  CH2 TRP A 179      17.696  46.401  35.011  1.00  8.19      clus C  
ATOM   1401  N   GLN A 180      11.062  50.225  37.049  1.00  2.00      clus N  
ATOM   1402  CA  GLN A 180       9.846  50.751  37.612  1.00  2.00      clus C  
ATOM   1403  C   GLN A 180       9.118  51.389  36.449  1.00  2.00      clus C  
ATOM   1404  O   GLN A 180       7.946  51.124  36.211  1.00  8.99      clus O  
ATOM   1405  CB  GLN A 180      10.171  51.848  38.598  1.00  2.26      clus C  
ATOM   1406  CG  GLN A 180      11.089  51.458  39.698  1.00  2.76      clus C  
ATOM   1407  CD  GLN A 180      10.643  52.078  40.991  1.00  5.08      clus C  
ATOM   1408  NE2 GLN A 180       9.896  53.174  40.894  1.00  2.00      clus N  
ATOM   1409  OE1 GLN A 180      10.928  51.565  42.065  1.00  4.32      clus O  
ATOM   1410  N   GLY A 181       9.844  52.238  35.726  1.00  5.62      clus N  
ATOM   1411  CA  GLY A 181       9.284  52.932  34.589  1.00  2.00      clus C  
ATOM   1412  C   GLY A 181       9.295  54.432  34.782  1.00  5.43      clus C  
ATOM   1413  O   GLY A 181       9.513  54.955  35.889  1.00  9.57      clus O  
ATOM   1414  N   GLN A 182       9.023  55.145  33.702  1.00  7.73      clus N  
ATOM   1415  CA  GLN A 182       9.010  56.578  33.788  1.00  8.37      clus C  
ATOM   1416  C   GLN A 182       8.307  57.271  32.639  1.00 10.19      clus C  
ATOM   1417  O   GLN A 182       8.361  56.810  31.496  1.00 10.09      clus O  
ATOM   1418  CB  GLN A 182      10.442  57.069  33.882  1.00  7.98      clus C  
ATOM   1419  CG  GLN A 182      10.570  58.559  34.019  1.00  6.34      clus C  
ATOM   1420  CD  GLN A 182      11.918  58.968  34.536  1.00  6.31      clus C  
ATOM   1421  NE2 GLN A 182      12.809  58.003  34.706  1.00  2.00      clus N  
ATOM   1422  OE1 GLN A 182      12.154  60.138  34.806  1.00 16.30      clus O  
ATOM   1423  N   LEU A 183       7.601  58.352  32.977  1.00 12.69      clus N  
ATOM   1424  CA  LEU A 183       6.912  59.211  32.006  1.00 12.72      clus C  
ATOM   1425  C   LEU A 183       7.534  60.600  32.121  1.00 12.70      clus C  
ATOM   1426  O   LEU A 183       7.639  61.136  33.226  1.00 17.32      clus O  
ATOM   1427  CB  LEU A 183       5.428  59.333  32.320  1.00  8.88      clus C  
ATOM   1428  CG  LEU A 183       4.576  58.105  32.109  1.00  2.33      clus C  
ATOM   1429  CD1 LEU A 183       3.113  58.534  32.116  1.00  2.00      clus C  
ATOM   1430  CD2 LEU A 183       4.959  57.472  30.792  1.00  3.19      clus C  
ATOM   1431  N   ILE A 184       7.958  61.176  30.997  1.00 11.68      clus N  
ATOM   1432  CA  ILE A 184       8.570  62.512  31.001  1.00 12.86      clus C  
ATOM   1433  C   ILE A 184       7.984  63.415  29.913  1.00 16.20      clus C  
ATOM   1434  O   ILE A 184       8.200  63.200  28.712  1.00 20.35      clus O  
ATOM   1435  CB  ILE A 184      10.100  62.454  30.792  1.00  4.18      clus C  
ATOM   1436  CG1 ILE A 184      10.738  61.449  31.748  1.00  2.00      clus C  
ATOM   1437  CG2 ILE A 184      10.699  63.808  31.037  1.00  3.58      clus C  
ATOM   1438  CD1 ILE A 184      12.200  61.211  31.460  1.00 10.75      clus C  
ATOM   1439  N   SER A 185       7.246  64.433  30.335  1.00 16.91      clus N  
ATOM   1440  CA  SER A 185       6.661  65.337  29.369  1.00 10.95      clus C  
ATOM   1441  C   SER A 185       7.380  66.673  29.347  1.00 11.59      clus C  
ATOM   1442  O   SER A 185       7.512  67.337  30.373  1.00  4.37      clus O  
ATOM   1443  CB  SER A 185       5.173  65.537  29.635  1.00  7.71      clus C  
ATOM   1444  OG  SER A 185       4.513  65.949  28.448  1.00  9.15      clus O  
ATOM   1445  N   ASP A 186       7.887  67.027  28.172  1.00 11.17      clus N  
ATOM   1446  CA  ASP A 186       8.577  68.283  27.960  1.00 12.73      clus C  
ATOM   1447  C   ASP A 186       7.837  69.036  26.870  1.00 14.86      clus C  
ATOM   1448  O   ASP A 186       7.281  68.425  25.960  1.00 18.48      clus O  
ATOM   1449  CB  ASP A 186      10.017  68.026  27.535  1.00  9.95      clus C  
ATOM   1450  CG  ASP A 186      10.987  68.078  28.706  1.00 22.30      clus C  
ATOM   1451  OD1 ASP A 186      11.147  69.171  29.289  1.00 20.40      clus O  
ATOM   1452  OD2 ASP A 186      11.601  67.045  29.046  1.00 18.23      clus O1-
ATOM   1453  N   GLN A 187       7.741  70.353  27.000  1.00 17.57      clus N  
ATOM   1454  CA  GLN A 187       7.071  71.129  25.961  1.00 17.84      clus C  
ATOM   1455  C   GLN A 187       8.014  71.195  24.775  1.00 14.91      clus C  
ATOM   1456  O   GLN A 187       9.231  71.182  24.944  1.00 18.46      clus O  
ATOM   1457  CB  GLN A 187       6.677  72.520  26.449  1.00 20.61      clus C  
ATOM   1458  CG  GLN A 187       7.656  73.143  27.398  1.00 29.63      clus C  
ATOM   1459  CD  GLN A 187       7.051  74.310  28.134  1.00 32.58      clus C  
ATOM   1460  NE2 GLN A 187       5.887  74.089  28.732  1.00 26.83      clus N  
ATOM   1461  OE1 GLN A 187       7.615  75.402  28.158  1.00 34.54      clus O  
ATOM   1462  N   VAL A 188       7.446  71.239  23.579  1.00 15.97      clus N  
ATOM   1463  CA  VAL A 188       8.220  71.231  22.350  1.00 15.81      clus C  
ATOM   1464  C   VAL A 188       9.289  72.278  22.136  1.00 25.38      clus C  
ATOM   1465  O   VAL A 188      10.461  71.940  22.002  1.00 37.71      clus O  
ATOM   1466  CB  VAL A 188       7.311  71.225  21.132  1.00  5.87      clus C  
ATOM   1467  CG1 VAL A 188       8.130  71.105  19.870  1.00 12.91      clus C  
ATOM   1468  CG2 VAL A 188       6.342  70.087  21.227  1.00  2.50      clus C  
ATOM   1469  N   ALA A 189       8.889  73.540  22.056  1.00 30.64      clus N  
ATOM   1470  CA  ALA A 189       9.841  74.617  21.802  1.00 34.07      clus C  
ATOM   1471  C   ALA A 189      10.990  74.671  22.810  1.00 33.30      clus C  
ATOM   1472  O   ALA A 189      12.057  75.217  22.529  1.00 36.74      clus O  
ATOM   1473  CB  ALA A 189       9.115  75.938  21.721  1.00 29.49      clus C  
ATOM   1474  N   GLU A 190      10.756  74.098  23.981  1.00 30.54      clus N  
ATOM   1475  CA  GLU A 190      11.761  74.023  25.025  1.00 32.21      clus C  
ATOM   1476  C   GLU A 190      12.816  73.041  24.529  1.00 31.69      clus C  
ATOM   1477  O   GLU A 190      14.009  73.293  24.612  1.00 36.59      clus O  
ATOM   1478  CB  GLU A 190      11.130  73.453  26.281  1.00 29.62      clus C  
ATOM   1479  CG  GLU A 190      12.080  73.295  27.424  1.00 41.11      clus C  
ATOM   1480  CD  GLU A 190      12.055  74.488  28.344  1.00 55.17      clus C  
ATOM   1481  OE1 GLU A 190      12.857  75.425  28.122  1.00 62.20      clus O  
ATOM   1482  OE2 GLU A 190      11.219  74.493  29.279  1.00 57.26      clus O1-
ATOM   1483  N   ILE A 191      12.341  71.912  24.015  1.00 35.67      clus N  
ATOM   1484  CA  ILE A 191      13.174  70.841  23.482  1.00 27.73      clus C  
ATOM   1485  C   ILE A 191      13.991  71.330  22.297  1.00 24.81      clus C  
ATOM   1486  O   ILE A 191      15.091  70.866  22.054  1.00 22.40      clus O  
ATOM   1487  CB  ILE A 191      12.275  69.654  23.076  1.00 22.23      clus C  
ATOM   1488  CG1 ILE A 191      11.541  69.150  24.323  1.00 18.64      clus C  
ATOM   1489  CG2 ILE A 191      13.083  68.552  22.411  1.00 12.16      clus C  
ATOM   1490  CD1 ILE A 191      10.391  68.239  24.056  1.00 18.64      clus C  
ATOM   1491  N   VAL A 192      13.449  72.295  21.580  1.00 22.10      clus N  
ATOM   1492  CA  VAL A 192      14.126  72.852  20.432  1.00 31.03      clus C  
ATOM   1493  C   VAL A 192      15.044  73.961  20.892  1.00 33.37      clus C  
ATOM   1494  O   VAL A 192      16.224  73.954  20.569  1.00 38.13      clus O  
ATOM   1495  CB  VAL A 192      13.119  73.430  19.405  1.00 38.72      clus C  
ATOM   1496  CG1 VAL A 192      13.851  74.043  18.228  1.00 35.62      clus C  
ATOM   1497  CG2 VAL A 192      12.177  72.345  18.916  1.00 48.16      clus C  
ATOM   1498  N   SER A 193      14.501  74.889  21.678  1.00 33.84      clus N  
ATOM   1499  CA  SER A 193      15.252  76.045  22.172  1.00 28.16      clus C  
ATOM   1500  C   SER A 193      16.451  75.736  23.072  1.00 27.59      clus C  
ATOM   1501  O   SER A 193      17.447  76.460  23.062  1.00 29.00      clus O  
ATOM   1502  CB  SER A 193      14.313  77.043  22.872  1.00 31.52      clus C  
ATOM   1503  OG  SER A 193      14.105  76.741  24.242  1.00 26.73      clus O  
ATOM   1504  N   LYS A 194      16.352  74.670  23.856  1.00 26.31      clus N  
ATOM   1505  CA  LYS A 194      17.432  74.294  24.751  1.00 20.22      clus C  
ATOM   1506  C   LYS A 194      18.420  73.315  24.128  1.00 15.84      clus C  
ATOM   1507  O   LYS A 194      19.401  72.933  24.765  1.00 19.65      clus O  
ATOM   1508  CB  LYS A 194      16.875  73.718  26.044  1.00 21.13      clus C  
ATOM   1509  CG  LYS A 194      16.008  74.675  26.817  1.00 34.23      clus C  
ATOM   1510  CD  LYS A 194      16.736  75.972  27.111  1.00 46.72      clus C  
ATOM   1511  CE  LYS A 194      16.039  76.760  28.219  1.00 56.48      clus C  
ATOM   1512  NZ  LYS A 194      16.167  76.091  29.557  1.00 55.24      clus N1+
ATOM   1513  N   TYR A 195      18.187  72.909  22.885  1.00  4.81      clus N  
ATOM   1514  CA  TYR A 195      19.116  71.979  22.264  1.00  8.60      clus C  
ATOM   1515  C   TYR A 195      20.475  72.640  22.159  1.00 11.63      clus C  
ATOM   1516  O   TYR A 195      20.583  73.804  21.779  1.00 26.57      clus O  
ATOM   1517  CB  TYR A 195      18.657  71.526  20.872  1.00  3.86      clus C  
ATOM   1518  CG  TYR A 195      19.587  70.510  20.254  1.00  2.00      clus C  
ATOM   1519  CD1 TYR A 195      20.087  70.678  18.969  1.00  2.00      clus C  
ATOM   1520  CD2 TYR A 195      20.041  69.418  20.992  1.00  2.03      clus C  
ATOM   1521  CE1 TYR A 195      21.032  69.790  18.433  1.00  7.06      clus C  
ATOM   1522  CE2 TYR A 195      20.981  68.520  20.471  1.00  4.05      clus C  
ATOM   1523  CZ  TYR A 195      21.474  68.716  19.194  1.00  8.11      clus C  
ATOM   1524  OH  TYR A 195      22.419  67.850  18.696  1.00 13.97      clus O  
ATOM   1525  N   ASP A 196      21.503  71.904  22.551  1.00  7.14      clus N  
ATOM   1526  CA  ASP A 196      22.865  72.378  22.481  1.00  7.24      clus C  
ATOM   1527  C   ASP A 196      23.702  71.153  22.172  1.00  8.63      clus C  
ATOM   1528  O   ASP A 196      24.025  70.366  23.063  1.00 16.69      clus O  
ATOM   1529  CB  ASP A 196      23.288  72.980  23.818  1.00 17.85      clus C  
ATOM   1530  CG  ASP A 196      24.717  73.509  23.801  1.00 27.88      clus C  
ATOM   1531  OD1 ASP A 196      25.392  73.468  22.740  1.00 33.23      clus O  
ATOM   1532  OD2 ASP A 196      25.162  73.979  24.868  1.00 22.68      clus O1-
ATOM   1533  N   PRO A 197      24.107  71.000  20.905  1.00  2.91      clus N  
ATOM   1534  CA  PRO A 197      24.916  69.868  20.445  1.00  8.60      clus C  
ATOM   1535  C   PRO A 197      26.176  69.592  21.262  1.00 10.38      clus C  
ATOM   1536  O   PRO A 197      26.880  68.610  21.022  1.00  9.51      clus O  
ATOM   1537  CB  PRO A 197      25.253  70.262  19.008  1.00 10.53      clus C  
ATOM   1538  CG  PRO A 197      25.267  71.740  19.060  1.00 17.34      clus C  
ATOM   1539  CD  PRO A 197      24.030  72.032  19.868  1.00 14.39      clus C  
ATOM   1540  N   ASN A 198      26.451  70.447  22.241  1.00 18.85      clus N  
ATOM   1541  CA  ASN A 198      27.632  70.281  23.070  1.00 20.78      clus C  
ATOM   1542  C   ASN A 198      27.319  69.850  24.483  1.00 21.34      clus C  
ATOM   1543  O   ASN A 198      28.201  69.805  25.344  1.00 26.40      clus O  
ATOM   1544  CB  ASN A 198      28.480  71.546  23.059  1.00 16.55      clus C  
ATOM   1545  CG  ASN A 198      29.093  71.806  21.711  1.00 22.99      clus C  
ATOM   1546  ND2 ASN A 198      28.677  72.893  21.069  1.00 33.82      clus N  
ATOM   1547  OD1 ASN A 198      29.905  71.017  21.227  1.00 20.03      clus O  
ATOM   1548  N   VAL A 199      26.056  69.550  24.735  1.00 22.45      clus N  
ATOM   1549  CA  VAL A 199      25.669  69.075  26.051  1.00 31.03      clus C  
ATOM   1550  C   VAL A 199      25.028  67.713  25.845  1.00 29.88      clus C  
ATOM   1551  O   VAL A 199      24.138  67.554  25.006  1.00 31.14      clus O  
ATOM   1552  CB  VAL A 199      24.672  70.021  26.739  1.00 37.28      clus C  
ATOM   1553  CG1 VAL A 199      24.404  69.562  28.178  1.00 36.54      clus C  
ATOM   1554  CG2 VAL A 199      25.207  71.433  26.721  1.00 42.54      clus C  
ATOM   1555  N   TYR A 200      25.527  66.715  26.559  1.00 26.65      clus N  
ATOM   1556  CA  TYR A 200      24.969  65.387  26.423  1.00 26.61      clus C  
ATOM   1557  C   TYR A 200      23.810  65.202  27.407  1.00 20.98      clus C  
ATOM   1558  O   TYR A 200      22.988  64.304  27.244  1.00 21.93      clus O  
ATOM   1559  CB  TYR A 200      26.042  64.325  26.663  1.00 28.99      clus C  
ATOM   1560  CG  TYR A 200      27.250  64.384  25.740  1.00 23.13      clus C  
ATOM   1561  CD1 TYR A 200      27.108  64.433  24.353  1.00  9.55      clus C  
ATOM   1562  CD2 TYR A 200      28.540  64.318  26.264  1.00 18.20      clus C  
ATOM   1563  CE1 TYR A 200      28.223  64.402  23.513  1.00  2.00      clus C  
ATOM   1564  CE2 TYR A 200      29.662  64.285  25.437  1.00 14.30      clus C  
ATOM   1565  CZ  TYR A 200      29.508  64.322  24.059  1.00 13.02      clus C  
ATOM   1566  OH  TYR A 200      30.654  64.242  23.256  1.00 13.92      clus O  
ATOM   1567  N   SER A 201      23.709  66.080  28.398  1.00 11.61      clus N  
ATOM   1568  CA  SER A 201      22.647  65.949  29.379  1.00  9.02      clus C  
ATOM   1569  C   SER A 201      21.977  67.298  29.635  1.00  8.87      clus C  
ATOM   1570  O   SER A 201      22.228  67.966  30.631  1.00 15.30      clus O  
ATOM   1571  CB  SER A 201      23.231  65.355  30.658  1.00 11.58      clus C  
ATOM   1572  OG  SER A 201      24.023  64.210  30.362  1.00  7.24      clus O  
ATOM   1573  N   ILE A 202      21.093  67.667  28.720  1.00  6.66      clus N  
ATOM   1574  CA  ILE A 202      20.371  68.938  28.750  1.00 12.58      clus C  
ATOM   1575  C   ILE A 202      19.225  69.048  29.755  1.00 13.41      clus C  
ATOM   1576  O   ILE A 202      18.365  68.171  29.833  1.00 22.51      clus O  
ATOM   1577  CB  ILE A 202      19.837  69.273  27.320  1.00  4.99      clus C  
ATOM   1578  CG1 ILE A 202      21.016  69.447  26.356  1.00  2.00      clus C  
ATOM   1579  CG2 ILE A 202      18.923  70.488  27.340  1.00  2.00      clus C  
ATOM   1580  CD1 ILE A 202      20.624  69.519  24.915  1.00  8.33      clus C  
ATOM   1581  N   LYS A 203      19.192  70.169  30.473  1.00 25.46      clus N  
ATOM   1582  CA  LYS A 203      18.154  70.438  31.470  1.00 38.18      clus C  
ATOM   1583  C   LYS A 203      17.060  71.306  30.869  1.00 36.72      clus C  
ATOM   1584  O   LYS A 203      17.315  72.420  30.414  1.00 36.01      clus O  
ATOM   1585  CB  LYS A 203      18.756  71.126  32.702  1.00 48.71      clus C  
ATOM   1586  CG  LYS A 203      19.838  70.297  33.386  1.00 65.02      clus C  
ATOM   1587  CD  LYS A 203      20.717  71.131  34.308  1.00 73.82      clus C  
ATOM   1588  CE  LYS A 203      21.913  70.323  34.816  1.00 79.50      clus C  
ATOM   1589  NZ  LYS A 203      22.851  69.929  33.720  1.00 85.61      clus N1+
ATOM   1590  N   TYR A 204      15.841  70.779  30.862  1.00 37.55      clus N  
ATOM   1591  CA  TYR A 204      14.692  71.490  30.312  1.00 35.54      clus C  
ATOM   1592  C   TYR A 204      13.899  72.133  31.451  1.00 36.38      clus C  
ATOM   1593  O   TYR A 204      13.671  71.499  32.484  1.00 36.34      clus O  
ATOM   1594  CB  TYR A 204      13.832  70.517  29.495  1.00 30.25      clus C  
ATOM   1595  CG  TYR A 204      14.543  69.957  28.275  1.00 25.34      clus C  
ATOM   1596  CD1 TYR A 204      15.217  68.733  28.325  1.00 25.92      clus C  
ATOM   1597  CD2 TYR A 204      14.562  70.666  27.079  1.00 28.87      clus C  
ATOM   1598  CE1 TYR A 204      15.894  68.234  27.206  1.00 22.82      clus C  
ATOM   1599  CE2 TYR A 204      15.232  70.181  25.957  1.00 32.49      clus C  
ATOM   1600  CZ  TYR A 204      15.896  68.968  26.020  1.00 33.06      clus C  
ATOM   1601  OH  TYR A 204      16.547  68.514  24.886  1.00 29.95      clus O  
ATOM   1602  N   ASN A 205      13.496  73.390  31.262  1.00 37.87      clus N  
ATOM   1603  CA  ASN A 205      12.771  74.148  32.287  1.00 46.19      clus C  
ATOM   1604  C   ASN A 205      11.482  73.541  32.818  1.00 47.32      clus C  
ATOM   1605  O   ASN A 205      11.465  72.966  33.914  1.00 44.11      clus O  
ATOM   1606  CB  ASN A 205      12.506  75.590  31.828  1.00 54.41      clus C  
ATOM   1607  CG  ASN A 205      13.695  76.521  32.066  1.00 61.97      clus C  
ATOM   1608  ND2 ASN A 205      13.772  77.602  31.282  1.00 64.95      clus N  
ATOM   1609  OD1 ASN A 205      14.522  76.284  32.954  1.00 64.93      clus O  
ATOM   1610  N   ASN A 206      10.399  73.712  32.063  1.00 46.37      clus N  
ATOM   1611  CA  ASN A 206       9.094  73.197  32.469  1.00 43.94      clus C  
ATOM   1612  C   ASN A 206       8.920  71.731  32.123  1.00 37.70      clus C  
ATOM   1613  O   ASN A 206       8.022  71.374  31.364  1.00 36.39      clus O  
ATOM   1614  CB  ASN A 206       7.980  74.019  31.830  1.00 45.85      clus C  
ATOM   1615  CG  ASN A 206       8.188  75.504  32.008  1.00 44.77      clus C  
ATOM   1616  ND2 ASN A 206       7.957  76.258  30.945  1.00 49.94      clus N  
ATOM   1617  OD1 ASN A 206       8.569  75.970  33.085  1.00 42.40      clus O  
ATOM   1618  N   GLN A 207       9.803  70.894  32.661  1.00 32.04      clus N  
ATOM   1619  CA  GLN A 207       9.743  69.461  32.422  1.00 26.64      clus C  
ATOM   1620  C   GLN A 207       8.966  68.741  33.508  1.00 27.55      clus C  
ATOM   1621  O   GLN A 207       9.183  68.960  34.698  1.00 29.13      clus O  
ATOM   1622  CB  GLN A 207      11.136  68.846  32.339  1.00 19.83      clus C  
ATOM   1623  CG  GLN A 207      11.119  67.328  32.205  1.00 12.86      clus C  
ATOM   1624  CD  GLN A 207      12.501  66.700  32.337  1.00 17.54      clus C  
ATOM   1625  NE2 GLN A 207      13.266  66.705  31.238  1.00  2.00      clus N  
ATOM   1626  OE1 GLN A 207      12.873  66.203  33.411  1.00 15.17      clus O  
ATOM   1627  N   LEU A 208       8.055  67.877  33.075  1.00 29.42      clus N  
ATOM   1628  CA  LEU A 208       7.244  67.075  33.967  1.00 23.47      clus C  
ATOM   1629  C   LEU A 208       7.830  65.679  33.873  1.00 27.14      clus C  
ATOM   1630  O   LEU A 208       8.172  65.212  32.784  1.00 30.36      clus O  
ATOM   1631  CB  LEU A 208       5.801  67.096  33.488  1.00 22.80      clus C  
ATOM   1632  CG  LEU A 208       5.191  68.498  33.539  1.00 19.27      clus C  
ATOM   1633  CD1 LEU A 208       3.817  68.524  32.900  1.00 13.75      clus C  
ATOM   1634  CD2 LEU A 208       5.105  68.949  34.983  1.00 21.53      clus C  
ATOM   1635  N   ALA A 209       8.016  65.040  35.022  1.00 28.62      clus N  
ATOM   1636  CA  ALA A 209       8.586  63.699  35.054  1.00 26.68      clus C  
ATOM   1637  C   ALA A 209       8.182  62.918  36.302  1.00 28.30      clus C  
ATOM   1638  O   ALA A 209       7.876  63.508  37.343  1.00 34.25      clus O  
ATOM   1639  CB  ALA A 209      10.096  63.780  34.938  1.00 15.70      clus C  
ATOM   1640  N   THR A 210       8.131  61.593  36.175  1.00 29.72      clus N  
ATOM   1641  CA  THR A 210       7.769  60.725  37.291  1.00 24.82      clus C  
ATOM   1642  C   THR A 210       9.012  60.107  37.914  1.00 23.50      clus C  
ATOM   1643  O   THR A 210       9.656  59.225  37.340  1.00 30.06      clus O  
ATOM   1644  CB  THR A 210       6.776  59.629  36.876  1.00 18.19      clus C  
ATOM   1645  CG2 THR A 210       5.567  60.267  36.231  1.00 13.77      clus C  
ATOM   1646  OG1 THR A 210       7.393  58.727  35.946  1.00 15.00      clus O  
ATOM   1647  N   ARG A 211       9.327  60.604  39.104  1.00 26.53      clus N  
ATOM   1648  CA  ARG A 211      10.475  60.197  39.908  1.00 31.15      clus C  
ATOM   1649  C   ARG A 211      10.490  58.736  40.365  1.00 24.06      clus C  
ATOM   1650  O   ARG A 211       9.526  57.987  40.179  1.00 22.15      clus O  
ATOM   1651  CB  ARG A 211      10.569  61.127  41.127  1.00 40.38      clus C  
ATOM   1652  CG  ARG A 211       9.231  61.322  41.852  1.00 52.55      clus C  
ATOM   1653  CD  ARG A 211       9.126  62.688  42.531  1.00 63.13      clus C  
ATOM   1654  NE  ARG A 211       7.732  63.037  42.812  1.00 74.08      clus N  
ATOM   1655  CZ  ARG A 211       7.300  63.570  43.953  1.00 75.62      clus C  
ATOM   1656  NH1 ARG A 211       8.154  63.827  44.940  1.00 78.58      clus N1+
ATOM   1657  NH2 ARG A 211       6.007  63.836  44.113  1.00 72.48      clus N  
ATOM   1658  N   THR A 212      11.612  58.341  40.953  1.00 13.80      clus N  
ATOM   1659  CA  THR A 212      11.782  56.991  41.455  1.00 13.65      clus C  
ATOM   1660  C   THR A 212      10.812  56.734  42.603  1.00 11.91      clus C  
ATOM   1661  O   THR A 212      10.433  57.655  43.325  1.00  8.94      clus O  
ATOM   1662  CB  THR A 212      13.199  56.776  41.971  1.00 15.91      clus C  
ATOM   1663  CG2 THR A 212      13.412  57.553  43.235  1.00 13.19      clus C  
ATOM   1664  OG1 THR A 212      13.390  55.393  42.267  1.00 21.34      clus O  
ATOM   1665  N   ALA A 213      10.430  55.474  42.777  1.00 16.21      clus N  
ATOM   1666  CA  ALA A 213       9.506  55.094  43.838  1.00 18.98      clus C  
ATOM   1667  C   ALA A 213      10.084  53.965  44.688  1.00 20.94      clus C  
ATOM   1668  O   ALA A 213      11.234  53.552  44.483  1.00 18.30      clus O  
ATOM   1669  CB  ALA A 213       8.174  54.683  43.247  1.00 27.23      clus C  
ATOM   1670  N   GLN A 214       9.277  53.478  45.637  1.00 18.73      clus N  
ATOM   1671  CA  GLN A 214       9.674  52.410  46.550  1.00 22.17      clus C  
ATOM   1672  C   GLN A 214      10.005  51.097  45.825  1.00 23.15      clus C  
ATOM   1673  O   GLN A 214       9.358  50.739  44.835  1.00 25.65      clus O  
ATOM   1674  CB  GLN A 214       8.591  52.218  47.615  1.00 29.48      clus C  
ATOM   1675  CG  GLN A 214       8.451  53.422  48.557  1.00 37.01      clus C  
ATOM   1676  CD  GLN A 214       7.023  53.957  48.668  1.00 41.28      clus C  
ATOM   1677  NE2 GLN A 214       6.819  54.913  49.569  1.00 42.19      clus N  
ATOM   1678  OE1 GLN A 214       6.123  53.531  47.945  1.00 46.22      clus O  
ATOM   1679  N   ALA A 215      11.029  50.404  46.326  1.00 18.25      clus N  
ATOM   1680  CA  ALA A 215      11.539  49.139  45.777  1.00 11.84      clus C  
ATOM   1681  C   ALA A 215      10.516  48.111  45.318  1.00 14.22      clus C  
ATOM   1682  O   ALA A 215      10.745  47.411  44.340  1.00 11.03      clus O  
ATOM   1683  CB  ALA A 215      12.477  48.497  46.771  1.00 19.00      clus C  
ATOM   1684  N   ILE A 216       9.423  47.980  46.065  1.00 11.06      clus N  
ATOM   1685  CA  ILE A 216       8.352  47.044  45.749  1.00  6.70      clus C  
ATOM   1686  C   ILE A 216       7.713  47.372  44.393  1.00  9.17      clus C  
ATOM   1687  O   ILE A 216       6.963  46.559  43.844  1.00 20.13      clus O  
ATOM   1688  CB  ILE A 216       7.276  47.042  46.869  1.00  6.00      clus C  
ATOM   1689  CG1 ILE A 216       6.243  45.939  46.620  1.00 15.93      clus C  
ATOM   1690  CG2 ILE A 216       6.607  48.391  46.957  1.00  6.68      clus C  
ATOM   1691  CD1 ILE A 216       5.169  45.807  47.698  1.00 25.12      clus C  
ATOM   1692  N   PHE A 217       8.025  48.548  43.847  1.00  9.90      clus N  
ATOM   1693  CA  PHE A 217       7.487  48.965  42.554  1.00  6.03      clus C  
ATOM   1694  C   PHE A 217       8.447  48.712  41.417  1.00  7.93      clus C  
ATOM   1695  O   PHE A 217       8.253  49.238  40.338  1.00 11.37      clus O  
ATOM   1696  CB  PHE A 217       7.122  50.443  42.568  1.00  5.86      clus C  
ATOM   1697  CG  PHE A 217       5.952  50.765  43.437  1.00 18.64      clus C  
ATOM   1698  CD1 PHE A 217       4.652  50.564  42.975  1.00 16.81      clus C  
ATOM   1699  CD2 PHE A 217       6.136  51.273  44.723  1.00 16.97      clus C  
ATOM   1700  CE1 PHE A 217       3.538  50.870  43.788  1.00 11.89      clus C  
ATOM   1701  CE2 PHE A 217       5.029  51.583  45.545  1.00 17.98      clus C  
ATOM   1702  CZ  PHE A 217       3.728  51.381  45.075  1.00  6.92      clus C  
ATOM   1703  N   ASP A 218       9.483  47.909  41.651  1.00  6.19      clus N  
ATOM   1704  CA  ASP A 218      10.465  47.615  40.605  1.00  2.00      clus C  
ATOM   1705  C   ASP A 218       9.856  46.686  39.580  1.00  2.00      clus C  
ATOM   1706  O   ASP A 218       8.856  46.034  39.850  1.00 12.19      clus O  
ATOM   1707  CB  ASP A 218      11.722  46.962  41.180  1.00  2.00      clus C  
ATOM   1708  CG  ASP A 218      12.528  47.883  42.103  1.00 12.42      clus C  
ATOM   1709  OD1 ASP A 218      13.592  47.438  42.574  1.00 18.76      clus O  
ATOM   1710  OD2 ASP A 218      12.116  49.031  42.375  1.00 15.65      clus O1-
ATOM   1711  N   ASP A 219      10.445  46.659  38.393  1.00  5.99      clus N  
ATOM   1712  CA  ASP A 219      10.002  45.811  37.287  1.00  5.19      clus C  
ATOM   1713  C   ASP A 219       8.528  45.922  36.930  1.00  7.62      clus C  
ATOM   1714  O   ASP A 219       7.901  44.953  36.508  1.00  8.99      clus O  
ATOM   1715  CB  ASP A 219      10.378  44.364  37.556  1.00  7.14      clus C  
ATOM   1716  CG  ASP A 219      11.699  44.242  38.263  1.00 11.61      clus C  
ATOM   1717  OD1 ASP A 219      12.752  44.168  37.602  1.00 22.75      clus O  
ATOM   1718  OD2 ASP A 219      11.685  44.247  39.497  1.00 13.58      clus O1-
ATOM   1719  N   SER A 220       7.981  47.118  37.099  1.00  6.25      clus N  
ATOM   1720  CA  SER A 220       6.589  47.364  36.776  1.00  6.93      clus C  
ATOM   1721  C   SER A 220       6.449  47.797  35.320  1.00  7.44      clus C  
ATOM   1722  O   SER A 220       5.381  47.679  34.743  1.00 14.76      clus O  
ATOM   1723  CB  SER A 220       6.023  48.427  37.698  1.00  6.96      clus C  
ATOM   1724  OG  SER A 220       6.331  48.107  39.035  1.00 18.51      clus O  
ATOM   1725  N   TYR A 221       7.528  48.315  34.736  1.00  2.35      clus N  
ATOM   1726  CA  TYR A 221       7.543  48.749  33.345  1.00  5.75      clus C  
ATOM   1727  C   TYR A 221       6.621  49.904  32.975  1.00  8.70      clus C  
ATOM   1728  O   TYR A 221       6.020  49.872  31.899  1.00 11.74      clus O  
ATOM   1729  CB  TYR A 221       7.234  47.591  32.386  1.00  5.71      clus C  
ATOM   1730  CG  TYR A 221       8.273  46.506  32.256  1.00  3.81      clus C  
ATOM   1731  CD1 TYR A 221       8.032  45.396  31.468  1.00  2.00      clus C  
ATOM   1732  CD2 TYR A 221       9.478  46.564  32.949  1.00  9.20      clus C  
ATOM   1733  CE1 TYR A 221       8.960  44.362  31.372  1.00  2.00      clus C  
ATOM   1734  CE2 TYR A 221      10.420  45.521  32.856  1.00  3.97      clus C  
ATOM   1735  CZ  TYR A 221      10.151  44.429  32.065  1.00  2.00      clus C  
ATOM   1736  OH  TYR A 221      11.083  43.417  31.946  1.00 14.13      clus O  
ATOM   1737  N   LEU A 222       6.497  50.923  33.826  1.00  9.01      clus N  
ATOM   1738  CA  LEU A 222       5.653  52.081  33.478  1.00 10.84      clus C  
ATOM   1739  C   LEU A 222       6.206  52.731  32.204  1.00  8.97      clus C  
ATOM   1740  O   LEU A 222       7.419  52.897  32.060  1.00 15.86      clus O  
ATOM   1741  CB  LEU A 222       5.603  53.108  34.624  1.00  5.49      clus C  
ATOM   1742  CG  LEU A 222       5.104  54.541  34.372  1.00  2.00      clus C  
ATOM   1743  CD1 LEU A 222       3.796  54.568  33.621  1.00  2.00      clus C  
ATOM   1744  CD2 LEU A 222       4.982  55.267  35.689  1.00  2.00      clus C  
ATOM   1745  N   GLY A 223       5.325  53.056  31.267  1.00  2.00      clus N  
ATOM   1746  CA  GLY A 223       5.783  53.648  30.027  1.00  3.45      clus C  
ATOM   1747  C   GLY A 223       5.930  52.661  28.880  1.00  3.85      clus C  
ATOM   1748  O   GLY A 223       6.633  52.929  27.908  1.00  2.00      clus O  
ATOM   1749  N   TYR A 224       5.312  51.493  29.013  1.00  3.98      clus N  
ATOM   1750  CA  TYR A 224       5.353  50.482  27.956  1.00  2.13      clus C  
ATOM   1751  C   TYR A 224       4.459  51.072  26.862  1.00  3.79      clus C  
ATOM   1752  O   TYR A 224       4.799  51.060  25.676  1.00  2.37      clus O  
ATOM   1753  CB  TYR A 224       4.765  49.138  28.469  1.00  3.80      clus C  
ATOM   1754  CG  TYR A 224       5.034  47.913  27.597  1.00  2.00      clus C  
ATOM   1755  CD1 TYR A 224       5.956  46.936  27.988  1.00  2.00      clus C  
ATOM   1756  CD2 TYR A 224       4.425  47.768  26.359  1.00  2.00      clus C  
ATOM   1757  CE1 TYR A 224       6.271  45.864  27.162  1.00  2.00      clus C  
ATOM   1758  CE2 TYR A 224       4.734  46.703  25.527  1.00  2.00      clus C  
ATOM   1759  CZ  TYR A 224       5.657  45.764  25.932  1.00  2.00      clus C  
ATOM   1760  OH  TYR A 224       6.002  44.764  25.069  1.00  4.02      clus O  
ATOM   1761  N   SER A 225       3.342  51.649  27.304  1.00  4.08      clus N  
ATOM   1762  CA  SER A 225       2.352  52.238  26.424  1.00  5.57      clus C  
ATOM   1763  C   SER A 225       1.934  53.622  26.879  1.00 18.33      clus C  
ATOM   1764  O   SER A 225       1.757  53.880  28.078  1.00 16.92      clus O  
ATOM   1765  CB  SER A 225       1.115  51.365  26.354  1.00  2.00      clus C  
ATOM   1766  OG  SER A 225       0.254  51.863  25.351  1.00 15.78      clus O  
ATOM   1767  N   VAL A 226       1.668  54.471  25.886  1.00 21.81      clus N  
ATOM   1768  CA  VAL A 226       1.286  55.858  26.112  1.00 15.88      clus C  
ATOM   1769  C   VAL A 226       0.156  56.364  25.210  1.00 12.31      clus C  
ATOM   1770  O   VAL A 226       0.109  56.102  24.005  1.00 17.80      clus O  
ATOM   1771  CB  VAL A 226       2.555  56.742  26.004  1.00 15.01      clus C  
ATOM   1772  CG1 VAL A 226       2.245  58.127  25.453  1.00 11.52      clus C  
ATOM   1773  CG2 VAL A 226       3.212  56.825  27.370  1.00 14.12      clus C  
ATOM   1774  N   ALA A 227      -0.776  57.054  25.843  1.00  6.35      clus N  
ATOM   1775  CA  ALA A 227      -1.922  57.650  25.179  1.00  7.87      clus C  
ATOM   1776  C   ALA A 227      -2.252  58.869  26.021  1.00 12.93      clus C  
ATOM   1777  O   ALA A 227      -1.939  58.904  27.217  1.00 13.85      clus O  
ATOM   1778  CB  ALA A 227      -3.084  56.699  25.165  1.00 14.86      clus C  
ATOM   1779  N   VAL A 228      -2.960  59.829  25.439  1.00 15.12      clus N  
ATOM   1780  CA  VAL A 228      -3.241  61.049  26.179  1.00 14.26      clus C  
ATOM   1781  C   VAL A 228      -4.557  61.775  25.869  1.00 14.96      clus C  
ATOM   1782  O   VAL A 228      -4.927  61.927  24.705  1.00 12.45      clus O  
ATOM   1783  CB  VAL A 228      -2.040  61.992  26.007  1.00 12.15      clus C  
ATOM   1784  CG1 VAL A 228      -1.765  62.244  24.527  1.00  2.17      clus C  
ATOM   1785  CG2 VAL A 228      -2.248  63.265  26.773  1.00 20.45      clus C  
ATOM   1786  N   GLY A 229      -5.249  62.223  26.923  1.00 12.97      clus N  
ATOM   1787  CA  GLY A 229      -6.516  62.931  26.772  1.00 13.95      clus C  
ATOM   1788  C   GLY A 229      -6.890  63.696  28.029  1.00 18.10      clus C  
ATOM   1789  O   GLY A 229      -6.184  63.589  29.032  1.00 21.87      clus O  
ATOM   1790  N   ASP A 230      -8.002  64.435  28.001  1.00 21.47      clus N  
ATOM   1791  CA  ASP A 230      -8.449  65.232  29.154  1.00 24.94      clus C  
ATOM   1792  C   ASP A 230      -9.269  64.431  30.191  1.00 30.64      clus C  
ATOM   1793  O   ASP A 230     -10.422  64.080  29.933  1.00 38.99      clus O  
ATOM   1794  CB  ASP A 230      -9.262  66.428  28.635  1.00 28.97      clus C  
ATOM   1795  CG  ASP A 230      -9.343  67.577  29.633  1.00 34.62      clus C  
ATOM   1796  OD1 ASP A 230      -9.615  68.719  29.197  1.00 38.52      clus O  
ATOM   1797  OD2 ASP A 230      -9.142  67.349  30.841  1.00 25.41      clus O1-
ATOM   1798  N   PHE A 231      -8.697  64.183  31.371  1.00 28.01      clus N  
ATOM   1799  CA  PHE A 231      -9.404  63.426  32.418  1.00 31.77      clus C  
ATOM   1800  C   PHE A 231      -9.744  64.203  33.670  1.00 33.66      clus C  
ATOM   1801  O   PHE A 231     -10.724  63.896  34.362  1.00 35.62      clus O  
ATOM   1802  CB  PHE A 231      -8.640  62.163  32.778  1.00 27.17      clus C  
ATOM   1803  CG  PHE A 231      -8.615  61.199  31.680  1.00 26.33      clus C  
ATOM   1804  CD1 PHE A 231      -9.727  60.413  31.426  1.00 27.13      clus C  
ATOM   1805  CD2 PHE A 231      -7.552  61.177  30.805  1.00 26.86      clus C  
ATOM   1806  CE1 PHE A 231      -9.786  59.628  30.303  1.00 28.81      clus C  
ATOM   1807  CE2 PHE A 231      -7.594  60.398  29.678  1.00 29.79      clus C  
ATOM   1808  CZ  PHE A 231      -8.718  59.619  29.421  1.00 34.48      clus C  
ATOM   1809  N   ASN A 232      -8.875  65.155  34.000  1.00 42.25      clus N  
ATOM   1810  CA  ASN A 232      -9.075  66.033  35.146  1.00 45.25      clus C  
ATOM   1811  C   ASN A 232     -10.240  66.911  34.712  1.00 51.90      clus C  
ATOM   1812  O   ASN A 232     -10.659  66.855  33.546  1.00 55.99      clus O  
ATOM   1813  CB  ASN A 232      -7.825  66.902  35.386  1.00 36.63      clus C  
ATOM   1814  CG  ASN A 232      -7.410  67.707  34.144  1.00 31.92      clus C  
ATOM   1815  ND2 ASN A 232      -6.450  68.610  34.309  1.00 29.31      clus N  
ATOM   1816  OD1 ASN A 232      -7.943  67.507  33.057  1.00 27.11      clus O  
ATOM   1817  N   GLY A 233     -10.751  67.721  35.636  1.00 58.69      clus N  
ATOM   1818  CA  GLY A 233     -11.858  68.613  35.328  1.00 58.39      clus C  
ATOM   1819  C   GLY A 233     -11.757  69.172  33.924  1.00 57.58      clus C  
ATOM   1820  O   GLY A 233     -12.571  68.836  33.068  1.00 59.23      clus O  
ATOM   1821  N   ASP A 234     -10.704  69.937  33.655  1.00 57.72      clus N  
ATOM   1822  CA  ASP A 234     -10.529  70.509  32.327  1.00 54.64      clus C  
ATOM   1823  C   ASP A 234      -9.102  70.930  31.989  1.00 45.01      clus C  
ATOM   1824  O   ASP A 234      -8.136  70.677  32.726  1.00 40.76      clus O  
ATOM   1825  CB  ASP A 234     -11.483  71.702  32.129  1.00 69.95      clus C  
ATOM   1826  CG  ASP A 234     -12.252  71.634  30.809  1.00 84.03      clus C  
ATOM   1827  OD1 ASP A 234     -13.502  71.553  30.851  1.00 85.51      clus O  
ATOM   1828  OD2 ASP A 234     -11.610  71.667  29.733  1.00 93.27      clus O1-
ATOM   1829  N   GLY A 235      -9.000  71.594  30.852  1.00 38.06      clus N  
ATOM   1830  CA  GLY A 235      -7.726  72.058  30.382  1.00 43.11      clus C  
ATOM   1831  C   GLY A 235      -7.329  71.274  29.159  1.00 44.67      clus C  
ATOM   1832  O   GLY A 235      -8.152  70.915  28.309  1.00 43.26      clus O  
ATOM   1833  N   ILE A 236      -6.045  70.971  29.113  1.00 47.81      clus N  
ATOM   1834  CA  ILE A 236      -5.448  70.243  28.009  1.00 47.33      clus C  
ATOM   1835  C   ILE A 236      -5.559  68.725  28.109  1.00 40.78      clus C  
ATOM   1836  O   ILE A 236      -6.642  68.164  28.310  1.00 39.46      clus O  
ATOM   1837  CB  ILE A 236      -3.950  70.629  27.834  1.00 50.67      clus C  
ATOM   1838  CG1 ILE A 236      -3.258  70.799  29.214  1.00 41.82      clus C  
ATOM   1839  CG2 ILE A 236      -3.818  71.789  26.842  1.00 57.18      clus C  
ATOM   1840  CD1 ILE A 236      -3.733  71.978  30.106  1.00 29.23      clus C  
ATOM   1841  N   ASP A 237      -4.417  68.081  27.900  1.00 34.13      clus N  
ATOM   1842  CA  ASP A 237      -4.299  66.647  27.943  1.00 25.65      clus C  
ATOM   1843  C   ASP A 237      -3.621  66.210  29.228  1.00 26.54      clus C  
ATOM   1844  O   ASP A 237      -2.840  66.951  29.840  1.00 24.57      clus O  
ATOM   1845  CB  ASP A 237      -3.505  66.159  26.736  1.00 26.16      clus C  
ATOM   1846  CG  ASP A 237      -4.280  66.260  25.438  1.00 29.56      clus C  
ATOM   1847  OD1 ASP A 237      -3.668  66.006  24.377  1.00 30.20      clus O  
ATOM   1848  OD2 ASP A 237      -5.491  66.576  25.469  1.00 38.23      clus O1-
ATOM   1849  N   ASP A 238      -3.985  65.008  29.650  1.00 23.67      clus N  
ATOM   1850  CA  ASP A 238      -3.455  64.392  30.840  1.00 22.08      clus C  
ATOM   1851  C   ASP A 238      -2.781  63.136  30.381  1.00 21.89      clus C  
ATOM   1852  O   ASP A 238      -3.177  62.543  29.382  1.00 19.46      clus O  
ATOM   1853  CB  ASP A 238      -4.586  64.085  31.791  1.00 17.77      clus C  
ATOM   1854  CG  ASP A 238      -5.128  65.324  32.441  1.00 28.31      clus C  
ATOM   1855  OD1 ASP A 238      -4.747  66.440  32.031  1.00 28.61      clus O  
ATOM   1856  OD2 ASP A 238      -5.907  65.184  33.398  1.00 36.72      clus O1-
ATOM   1857  N   PHE A 239      -1.765  62.723  31.119  1.00 19.29      clus N  
ATOM   1858  CA  PHE A 239      -0.996  61.554  30.745  1.00 14.23      clus C  
ATOM   1859  C   PHE A 239      -1.602  60.234  31.146  1.00 14.53      clus C  
ATOM   1860  O   PHE A 239      -1.933  60.026  32.311  1.00 11.39      clus O  
ATOM   1861  CB  PHE A 239       0.398  61.684  31.315  1.00 10.54      clus C  
ATOM   1862  CG  PHE A 239       0.999  63.031  31.091  1.00 15.31      clus C  
ATOM   1863  CD1 PHE A 239       1.750  63.639  32.084  1.00 12.96      clus C  
ATOM   1864  CD2 PHE A 239       0.806  63.696  29.883  1.00 12.05      clus C  
ATOM   1865  CE1 PHE A 239       2.306  64.888  31.883  1.00 11.72      clus C  
ATOM   1866  CE2 PHE A 239       1.358  64.943  29.673  1.00 16.32      clus C  
ATOM   1867  CZ  PHE A 239       2.111  65.543  30.676  1.00 15.51      clus C  
ATOM   1868  N   VAL A 240      -1.762  59.361  30.151  1.00  9.65      clus N  
ATOM   1869  CA  VAL A 240      -2.314  58.018  30.343  1.00 15.14      clus C  
ATOM   1870  C   VAL A 240      -1.270  57.006  29.891  1.00 15.51      clus C  
ATOM   1871  O   VAL A 240      -0.769  57.084  28.765  1.00 19.68      clus O  
ATOM   1872  CB  VAL A 240      -3.635  57.806  29.551  1.00 17.05      clus C  
ATOM   1873  CG1 VAL A 240      -4.027  56.342  29.572  1.00 13.18      clus C  
ATOM   1874  CG2 VAL A 240      -4.754  58.647  30.162  1.00 16.49      clus C  
ATOM   1875  N   SER A 241      -0.948  56.054  30.767  1.00 13.82      clus N  
ATOM   1876  CA  SER A 241       0.072  55.053  30.457  1.00 11.16      clus C  
ATOM   1877  C   SER A 241      -0.157  53.672  31.064  1.00 14.87      clus C  
ATOM   1878  O   SER A 241      -0.606  53.556  32.211  1.00 14.72      clus O  
ATOM   1879  CB  SER A 241       1.436  55.567  30.901  1.00  2.00      clus C  
ATOM   1880  OG  SER A 241       2.440  54.599  30.680  1.00 12.07      clus O  
ATOM   1881  N   GLY A 242       0.192  52.634  30.294  1.00 17.12      clus N  
ATOM   1882  CA  GLY A 242       0.040  51.263  30.755  1.00 17.75      clus C  
ATOM   1883  C   GLY A 242       1.278  50.728  31.455  1.00 17.06      clus C  
ATOM   1884  O   GLY A 242       2.389  50.892  30.959  1.00 24.58      clus O  
ATOM   1885  N   VAL A 243       1.085  50.110  32.621  1.00 13.78      clus N  
ATOM   1886  CA  VAL A 243       2.162  49.510  33.434  1.00 11.67      clus C  
ATOM   1887  C   VAL A 243       1.845  48.005  33.505  1.00  9.68      clus C  
ATOM   1888  O   VAL A 243       1.394  47.517  34.541  1.00  7.52      clus O  
ATOM   1889  CB  VAL A 243       2.124  50.103  34.865  1.00  9.34      clus C  
ATOM   1890  CG1 VAL A 243       3.280  49.594  35.710  1.00 10.80      clus C  
ATOM   1891  CG2 VAL A 243       2.141  51.609  34.795  1.00 11.84      clus C  
ATOM   1892  N   PRO A 244       2.151  47.250  32.430  1.00  2.00      clus N  
ATOM   1893  CA  PRO A 244       1.913  45.814  32.272  1.00  7.13      clus C  
ATOM   1894  C   PRO A 244       2.348  44.863  33.372  1.00 12.88      clus C  
ATOM   1895  O   PRO A 244       1.748  43.797  33.541  1.00 11.68      clus O  
ATOM   1896  CB  PRO A 244       2.594  45.505  30.947  1.00  3.14      clus C  
ATOM   1897  CG  PRO A 244       3.716  46.395  30.962  1.00  2.11      clus C  
ATOM   1898  CD  PRO A 244       3.088  47.695  31.393  1.00  2.00      clus C  
ATOM   1899  N   ARG A 245       3.376  45.239  34.122  1.00 10.82      clus N  
ATOM   1900  CA  ARG A 245       3.868  44.392  35.190  1.00  7.00      clus C  
ATOM   1901  C   ARG A 245       3.595  44.941  36.575  1.00 10.50      clus C  
ATOM   1902  O   ARG A 245       4.212  44.522  37.544  1.00 19.87      clus O  
ATOM   1903  CB  ARG A 245       5.354  44.102  34.996  1.00  2.00      clus C  
ATOM   1904  CG  ARG A 245       5.630  43.093  33.884  1.00  3.83      clus C  
ATOM   1905  CD  ARG A 245       7.030  42.509  34.007  1.00  3.36      clus C  
ATOM   1906  NE  ARG A 245       7.308  42.069  35.376  1.00  2.00      clus N  
ATOM   1907  CZ  ARG A 245       7.692  40.842  35.715  1.00  2.00      clus C  
ATOM   1908  NH1 ARG A 245       7.859  39.907  34.789  1.00  2.00      clus N1+
ATOM   1909  NH2 ARG A 245       7.879  40.543  36.990  1.00  2.33      clus N  
ATOM   1910  N   ALA A 246       2.669  45.883  36.672  1.00  6.93      clus N  
ATOM   1911  CA  ALA A 246       2.314  46.457  37.959  1.00 10.42      clus C  
ATOM   1912  C   ALA A 246       1.585  45.388  38.757  1.00 12.45      clus C  
ATOM   1913  O   ALA A 246       1.264  44.317  38.218  1.00  7.10      clus O  
ATOM   1914  CB  ALA A 246       1.422  47.659  37.765  1.00 24.15      clus C  
ATOM   1915  N   ALA A 247       1.316  45.701  40.027  1.00  9.91      clus N  
ATOM   1916  CA  ALA A 247       0.635  44.802  40.979  1.00  7.42      clus C  
ATOM   1917  C   ALA A 247       0.894  43.348  40.685  1.00 15.65      clus C  
ATOM   1918  O   ALA A 247       0.030  42.656  40.162  1.00 24.00      clus O  
ATOM   1919  CB  ALA A 247      -0.846  45.066  40.994  1.00  3.11      clus C  
ATOM   1920  N   ARG A 248       2.126  42.927  40.928  1.00 14.66      clus N  
ATOM   1921  CA  ARG A 248       2.557  41.549  40.692  1.00 23.44      clus C  
ATOM   1922  C   ARG A 248       1.955  40.858  39.451  1.00 23.59      clus C  
ATOM   1923  O   ARG A 248       1.145  39.943  39.551  1.00 29.14      clus O  
ATOM   1924  CB  ARG A 248       2.389  40.729  41.983  1.00 32.08      clus C  
ATOM   1925  CG  ARG A 248       3.342  41.224  43.135  1.00 44.52      clus C  
ATOM   1926  CD  ARG A 248       4.616  40.319  43.310  1.00 49.23      clus C  
ATOM   1927  NE  ARG A 248       5.842  41.005  43.776  1.00 55.41      clus N  
ATOM   1928  CZ  ARG A 248       6.857  40.408  44.422  1.00 53.56      clus C  
ATOM   1929  NH1 ARG A 248       6.810  39.105  44.709  1.00 57.59      clus N1+
ATOM   1930  NH2 ARG A 248       7.962  41.099  44.727  1.00 49.39      clus N  
ATOM   1931  N   THR A 249       2.372  41.352  38.286  1.00 13.61      clus N  
ATOM   1932  CA  THR A 249       1.967  40.876  36.968  1.00 11.70      clus C  
ATOM   1933  C   THR A 249       0.504  40.974  36.573  1.00 11.98      clus C  
ATOM   1934  O   THR A 249       0.108  40.499  35.506  1.00  7.19      clus O  
ATOM   1935  CB  THR A 249       2.540  39.483  36.630  1.00 10.70      clus C  
ATOM   1936  CG2 THR A 249       3.983  39.608  36.274  1.00 12.83      clus C  
ATOM   1937  OG1 THR A 249       2.410  38.594  37.748  1.00 21.83      clus O  
ATOM   1938  N   LEU A 250      -0.287  41.629  37.411  1.00  8.53      clus N  
ATOM   1939  CA  LEU A 250      -1.703  41.853  37.123  1.00 10.21      clus C  
ATOM   1940  C   LEU A 250      -1.831  42.933  36.036  1.00 12.08      clus C  
ATOM   1941  O   LEU A 250      -2.668  42.846  35.123  1.00 10.84      clus O  
ATOM   1942  CB  LEU A 250      -2.409  42.378  38.372  1.00  5.30      clus C  
ATOM   1943  CG  LEU A 250      -3.095  41.441  39.349  1.00  2.00      clus C  
ATOM   1944  CD1 LEU A 250      -3.454  42.228  40.579  1.00  2.00      clus C  
ATOM   1945  CD2 LEU A 250      -4.341  40.887  38.728  1.00  2.03      clus C  
ATOM   1946  N   GLY A 251      -1.017  43.975  36.178  1.00  3.20      clus N  
ATOM   1947  CA  GLY A 251      -1.047  45.068  35.230  1.00  5.54      clus C  
ATOM   1948  C   GLY A 251      -1.842  46.210  35.809  1.00  6.97      clus C  
ATOM   1949  O   GLY A 251      -2.639  46.014  36.724  1.00  9.69      clus O  
ATOM   1950  N   MET A 252      -1.594  47.409  35.302  1.00  2.00      clus N  
ATOM   1951  CA  MET A 252      -2.289  48.602  35.757  1.00  2.00      clus C  
ATOM   1952  C   MET A 252      -2.147  49.672  34.696  1.00  2.00      clus C  
ATOM   1953  O   MET A 252      -1.283  49.576  33.833  1.00  2.00      clus O  
ATOM   1954  CB  MET A 252      -1.660  49.129  37.047  1.00  2.00      clus C  
ATOM   1955  CG  MET A 252      -2.230  48.581  38.333  1.00  5.65      clus C  
ATOM   1956  SD  MET A 252      -1.432  49.316  39.793  1.00 20.04      clus S  
ATOM   1957  CE  MET A 252      -2.335  50.804  39.936  1.00 10.24      clus C  
ATOM   1958  N   VAL A 253      -3.023  50.669  34.725  1.00  4.30      clus N  
ATOM   1959  CA  VAL A 253      -2.911  51.785  33.785  1.00 14.05      clus C  
ATOM   1960  C   VAL A 253      -3.051  53.089  34.560  1.00 18.34      clus C  
ATOM   1961  O   VAL A 253      -4.122  53.409  35.066  1.00 23.40      clus O  
ATOM   1962  CB  VAL A 253      -3.923  51.711  32.620  1.00 11.18      clus C  
ATOM   1963  CG1 VAL A 253      -3.788  52.939  31.740  1.00  4.15      clus C  
ATOM   1964  CG2 VAL A 253      -3.661  50.471  31.788  1.00  3.13      clus C  
ATOM   1965  N   TYR A 254      -1.932  53.798  34.684  1.00 17.99      clus N  
ATOM   1966  CA  TYR A 254      -1.845  55.060  35.407  1.00 16.49      clus C  
ATOM   1967  C   TYR A 254      -2.241  56.255  34.595  1.00 19.09      clus C  
ATOM   1968  O   TYR A 254      -1.787  56.402  33.466  1.00 18.92      clus O  
ATOM   1969  CB  TYR A 254      -0.412  55.323  35.817  1.00 17.85      clus C  
ATOM   1970  CG  TYR A 254       0.146  54.369  36.813  1.00 20.13      clus C  
ATOM   1971  CD1 TYR A 254      -0.683  53.539  37.557  1.00 19.38      clus C  
ATOM   1972  CD2 TYR A 254       1.510  54.310  37.032  1.00 17.01      clus C  
ATOM   1973  CE1 TYR A 254      -0.154  52.670  38.504  1.00 21.17      clus C  
ATOM   1974  CE2 TYR A 254       2.049  53.447  37.972  1.00 17.54      clus C  
ATOM   1975  CZ  TYR A 254       1.218  52.629  38.707  1.00 14.65      clus C  
ATOM   1976  OH  TYR A 254       1.762  51.780  39.646  1.00 10.82      clus O  
ATOM   1977  N   ILE A 255      -3.018  57.148  35.203  1.00 20.95      clus N  
ATOM   1978  CA  ILE A 255      -3.430  58.376  34.538  1.00 17.29      clus C  
ATOM   1979  C   ILE A 255      -2.942  59.554  35.358  1.00 19.24      clus C  
ATOM   1980  O   ILE A 255      -3.209  59.631  36.551  1.00 23.10      clus O  
ATOM   1981  CB  ILE A 255      -4.931  58.456  34.332  1.00 10.59      clus C  
ATOM   1982  CG1 ILE A 255      -5.378  57.303  33.436  1.00 14.73      clus C  
ATOM   1983  CG2 ILE A 255      -5.269  59.757  33.642  1.00 22.18      clus C  
ATOM   1984  CD1 ILE A 255      -6.801  57.391  32.947  1.00 14.67      clus C  
ATOM   1985  N   TYR A 256      -2.176  60.434  34.716  1.00 22.18      clus N  
ATOM   1986  CA  TYR A 256      -1.602  61.606  35.372  1.00 26.87      clus C  
ATOM   1987  C   TYR A 256      -2.093  62.949  34.869  1.00 33.32      clus C  
ATOM   1988  O   TYR A 256      -2.724  63.060  33.817  1.00 36.41      clus O  
ATOM   1989  CB  TYR A 256      -0.085  61.611  35.248  1.00 22.56      clus C  
ATOM   1990  CG  TYR A 256       0.614  60.510  35.984  1.00 24.47      clus C  
ATOM   1991  CD1 TYR A 256       0.632  59.210  35.489  1.00 26.95      clus C  
ATOM   1992  CD2 TYR A 256       1.320  60.777  37.140  1.00 24.66      clus C  
ATOM   1993  CE1 TYR A 256       1.348  58.213  36.132  1.00 18.58      clus C  
ATOM   1994  CE2 TYR A 256       2.032  59.789  37.788  1.00 22.39      clus C  
ATOM   1995  CZ  TYR A 256       2.045  58.514  37.282  1.00 20.04      clus C  
ATOM   1996  OH  TYR A 256       2.764  57.546  37.936  1.00 24.82      clus O  
ATOM   1997  N   ASP A 257      -1.675  63.975  35.600  1.00 34.04      clus N  
ATOM   1998  CA  ASP A 257      -2.015  65.362  35.325  1.00 33.06      clus C  
ATOM   1999  C   ASP A 257      -1.124  65.915  34.226  1.00 31.50      clus C  
ATOM   2000  O   ASP A 257       0.061  65.610  34.173  1.00 33.49      clus O  
ATOM   2001  CB  ASP A 257      -1.799  66.179  36.601  1.00 34.56      clus C  
ATOM   2002  CG  ASP A 257      -2.585  67.475  36.621  1.00 34.37      clus C  
ATOM   2003  OD1 ASP A 257      -3.206  67.763  37.661  1.00 38.55      clus O  
ATOM   2004  OD2 ASP A 257      -2.576  68.214  35.620  1.00 26.79      clus O1-
ATOM   2005  N   GLY A 258      -1.704  66.731  33.353  1.00 36.11      clus N  
ATOM   2006  CA  GLY A 258      -0.942  67.348  32.280  1.00 29.04      clus C  
ATOM   2007  C   GLY A 258      -0.246  68.616  32.754  1.00 27.17      clus C  
ATOM   2008  O   GLY A 258       0.496  69.232  31.992  1.00 19.71      clus O  
ATOM   2009  N   LYS A 259      -0.494  68.998  34.008  1.00 27.04      clus N  
ATOM   2010  CA  LYS A 259       0.089  70.189  34.618  1.00 26.06      clus C  
ATOM   2011  C   LYS A 259       1.080  69.785  35.700  1.00 24.63      clus C  
ATOM   2012  O   LYS A 259       2.279  69.994  35.559  1.00 26.80      clus O  
ATOM   2013  CB  LYS A 259      -1.002  71.051  35.265  1.00 33.98      clus C  
ATOM   2014  CG  LYS A 259      -2.037  71.621  34.317  1.00 49.25      clus C  
ATOM   2015  CD  LYS A 259      -1.432  72.655  33.383  1.00 64.17      clus C  
ATOM   2016  CE  LYS A 259      -0.914  73.863  34.149  1.00 72.96      clus C  
ATOM   2017  NZ  LYS A 259      -0.156  74.784  33.257  1.00 76.02      clus N1+
ATOM   2018  N   ASN A 260       0.552  69.215  36.781  1.00 23.67      clus N  
ATOM   2019  CA  ASN A 260       1.334  68.770  37.932  1.00 24.99      clus C  
ATOM   2020  C   ASN A 260       2.155  67.511  37.656  1.00 30.09      clus C  
ATOM   2021  O   ASN A 260       3.255  67.359  38.174  1.00 30.35      clus O  
ATOM   2022  CB  ASN A 260       0.411  68.430  39.123  1.00 33.22      clus C  
ATOM   2023  CG  ASN A 260      -0.491  69.582  39.548  1.00 43.55      clus C  
ATOM   2024  ND2 ASN A 260      -1.224  69.394  40.649  1.00 50.60      clus N  
ATOM   2025  OD1 ASN A 260      -0.533  70.617  38.891  1.00 56.38      clus O  
ATOM   2026  N   MET A 261       1.598  66.611  36.845  1.00 33.77      clus N  
ATOM   2027  CA  MET A 261       2.185  65.300  36.540  1.00 30.74      clus C  
ATOM   2028  C   MET A 261       1.909  64.434  37.786  1.00 29.79      clus C  
ATOM   2029  O   MET A 261       2.670  63.536  38.147  1.00 29.88      clus O  
ATOM   2030  CB  MET A 261       3.683  65.397  36.211  1.00 27.83      clus C  
ATOM   2031  CG  MET A 261       4.357  64.054  35.912  1.00 29.98      clus C  
ATOM   2032  SD  MET A 261       3.482  63.012  34.712  1.00 24.43      clus S  
ATOM   2033  CE  MET A 261       4.695  62.864  33.469  1.00 25.29      clus C  
ATOM   2034  N   SER A 262       0.810  64.764  38.458  1.00 29.81      clus N  
ATOM   2035  CA  SER A 262       0.361  64.073  39.659  1.00 31.35      clus C  
ATOM   2036  C   SER A 262      -0.617  62.997  39.223  1.00 31.33      clus C  
ATOM   2037  O   SER A 262      -1.175  63.091  38.126  1.00 31.33      clus O  
ATOM   2038  CB  SER A 262      -0.332  65.060  40.591  1.00 32.40      clus C  
ATOM   2039  OG  SER A 262      -1.335  65.774  39.899  1.00 32.05      clus O  
ATOM   2040  N   SER A 263      -0.852  61.998  40.077  1.00 22.00      clus N  
ATOM   2041  CA  SER A 263      -1.749  60.893  39.714  1.00 27.60      clus C  
ATOM   2042  C   SER A 263      -3.247  61.204  39.772  1.00 25.18      clus C  
ATOM   2043  O   SER A 263      -3.746  61.689  40.780  1.00 24.06      clus O  
ATOM   2044  CB  SER A 263      -1.425  59.629  40.531  1.00 31.24      clus C  
ATOM   2045  OG  SER A 263      -1.865  58.453  39.859  1.00 38.49      clus O  
ATOM   2046  N   LEU A 264      -3.942  60.946  38.666  1.00 24.14      clus N  
ATOM   2047  CA  LEU A 264      -5.382  61.161  38.562  1.00 23.65      clus C  
ATOM   2048  C   LEU A 264      -6.109  59.864  38.900  1.00 29.37      clus C  
ATOM   2049  O   LEU A 264      -6.700  59.742  39.966  1.00 35.11      clus O  
ATOM   2050  CB  LEU A 264      -5.774  61.592  37.145  1.00 26.71      clus C  
ATOM   2051  CG  LEU A 264      -6.082  63.049  36.775  1.00 28.01      clus C  
ATOM   2052  CD1 LEU A 264      -7.109  63.629  37.733  1.00 32.00      clus C  
ATOM   2053  CD2 LEU A 264      -4.834  63.876  36.795  1.00 22.51      clus C  
ATOM   2054  N   TYR A 265      -6.049  58.890  37.995  1.00 34.25      clus N  
ATOM   2055  CA  TYR A 265      -6.715  57.603  38.206  1.00 36.01      clus C  
ATOM   2056  C   TYR A 265      -5.817  56.389  37.938  1.00 31.59      clus C  
ATOM   2057  O   TYR A 265      -4.700  56.513  37.428  1.00 31.07      clus O  
ATOM   2058  CB  TYR A 265      -7.989  57.516  37.353  1.00 36.98      clus C  
ATOM   2059  CG  TYR A 265      -8.856  58.756  37.448  1.00 50.68      clus C  
ATOM   2060  CD1 TYR A 265      -9.736  58.951  38.522  1.00 59.81      clus C  
ATOM   2061  CD2 TYR A 265      -8.771  59.762  36.483  1.00 56.08      clus C  
ATOM   2062  CE1 TYR A 265     -10.511  60.124  38.631  1.00 60.58      clus C  
ATOM   2063  CE2 TYR A 265      -9.535  60.936  36.581  1.00 60.63      clus C  
ATOM   2064  CZ  TYR A 265     -10.398  61.110  37.654  1.00 62.36      clus C  
ATOM   2065  OH  TYR A 265     -11.122  62.280  37.745  1.00 65.44      clus O  
ATOM   2066  N   ASN A 266      -6.317  55.219  38.317  1.00 25.49      clus N  
ATOM   2067  CA  ASN A 266      -5.610  53.959  38.141  1.00 24.57      clus C  
ATOM   2068  C   ASN A 266      -6.586  52.874  37.689  1.00 24.54      clus C  
ATOM   2069  O   ASN A 266      -7.786  52.923  37.978  1.00 29.00      clus O  
ATOM   2070  CB  ASN A 266      -4.977  53.496  39.457  1.00 28.11      clus C  
ATOM   2071  CG  ASN A 266      -3.689  54.227  39.802  1.00 32.74      clus C  
ATOM   2072  ND2 ASN A 266      -3.206  53.957  41.020  1.00 27.16      clus N  
ATOM   2073  OD1 ASN A 266      -3.147  54.994  39.000  1.00 39.46      clus O  
ATOM   2074  N   PHE A 267      -6.057  51.899  36.968  1.00 18.71      clus N  
ATOM   2075  CA  PHE A 267      -6.835  50.771  36.487  1.00 15.28      clus C  
ATOM   2076  C   PHE A 267      -5.989  49.560  36.802  1.00 15.58      clus C  
ATOM   2077  O   PHE A 267      -4.765  49.640  36.779  1.00 22.78      clus O  
ATOM   2078  CB  PHE A 267      -7.004  50.839  34.979  1.00 16.02      clus C  
ATOM   2079  CG  PHE A 267      -7.906  51.926  34.515  1.00 15.49      clus C  
ATOM   2080  CD1 PHE A 267      -7.610  53.257  34.770  1.00 16.36      clus C  
ATOM   2081  CD2 PHE A 267      -9.045  51.620  33.784  1.00 17.46      clus C  
ATOM   2082  CE1 PHE A 267      -8.437  54.275  34.300  1.00 21.46      clus C  
ATOM   2083  CE2 PHE A 267      -9.877  52.626  33.310  1.00 19.76      clus C  
ATOM   2084  CZ  PHE A 267      -9.574  53.957  33.566  1.00 22.98      clus C  
ATOM   2085  N   THR A 268      -6.619  48.437  37.101  1.00 12.33      clus N  
ATOM   2086  CA  THR A 268      -5.839  47.249  37.382  1.00 17.27      clus C  
ATOM   2087  C   THR A 268      -6.350  46.084  36.574  1.00 18.74      clus C  
ATOM   2088  O   THR A 268      -7.523  46.023  36.216  1.00 18.24      clus O  
ATOM   2089  CB  THR A 268      -5.837  46.897  38.873  1.00 12.92      clus C  
ATOM   2090  CG2 THR A 268      -4.852  45.787  39.148  1.00  2.00      clus C  
ATOM   2091  OG1 THR A 268      -5.441  48.048  39.627  1.00 12.52      clus O  
ATOM   2092  N   GLY A 269      -5.445  45.191  36.210  1.00 23.43      clus N  
ATOM   2093  CA  GLY A 269      -5.859  44.035  35.453  1.00 27.46      clus C  
ATOM   2094  C   GLY A 269      -6.690  43.192  36.389  1.00 31.13      clus C  
ATOM   2095  O   GLY A 269      -6.846  43.536  37.561  1.00 35.73      clus O  
ATOM   2096  N   GLU A 270      -7.247  42.105  35.874  1.00 33.05      clus N  
ATOM   2097  CA  GLU A 270      -8.052  41.199  36.686  1.00 31.62      clus C  
ATOM   2098  C   GLU A 270      -7.338  39.835  36.753  1.00 23.30      clus C  
ATOM   2099  O   GLU A 270      -7.477  39.098  37.724  1.00 19.45      clus O  
ATOM   2100  CB  GLU A 270      -9.458  41.054  36.077  1.00 39.52      clus C  
ATOM   2101  CG  GLU A 270     -10.629  41.253  37.057  1.00 45.83      clus C  
ATOM   2102  CD  GLU A 270     -10.811  42.706  37.507  1.00 45.79      clus C  
ATOM   2103  OE1 GLU A 270     -11.075  43.576  36.642  1.00 44.59      clus O  
ATOM   2104  OE2 GLU A 270     -10.711  42.974  38.727  1.00 51.68      clus O1-
ATOM   2105  N   GLN A 271      -6.516  39.555  35.746  1.00 17.37      clus N  
ATOM   2106  CA  GLN A 271      -5.778  38.302  35.640  1.00 18.78      clus C  
ATOM   2107  C   GLN A 271      -4.291  38.551  35.422  1.00 18.88      clus C  
ATOM   2108  O   GLN A 271      -3.920  39.387  34.605  1.00 25.58      clus O  
ATOM   2109  CB  GLN A 271      -6.351  37.485  34.472  1.00 18.22      clus C  
ATOM   2110  CG  GLN A 271      -5.490  36.313  34.021  1.00 13.80      clus C  
ATOM   2111  CD  GLN A 271      -6.157  35.465  32.957  1.00 14.04      clus C  
ATOM   2112  NE2 GLN A 271      -5.465  35.272  31.836  1.00  7.83      clus N  
ATOM   2113  OE1 GLN A 271      -7.273  34.974  33.145  1.00 27.28      clus O  
ATOM   2114  N   MET A 272      -3.443  37.800  36.122  1.00 15.26      clus N  
ATOM   2115  CA  MET A 272      -1.990  37.958  35.998  1.00 10.95      clus C  
ATOM   2116  C   MET A 272      -1.443  37.506  34.651  1.00 12.31      clus C  
ATOM   2117  O   MET A 272      -2.087  36.762  33.908  1.00  8.43      clus O  
ATOM   2118  CB  MET A 272      -1.246  37.168  37.072  1.00  2.00      clus C  
ATOM   2119  CG  MET A 272      -1.798  37.273  38.455  1.00  5.53      clus C  
ATOM   2120  SD  MET A 272      -0.644  36.559  39.645  1.00 12.02      clus S  
ATOM   2121  CE  MET A 272      -1.195  37.515  41.153  1.00  6.00      clus C  
ATOM   2122  N   ALA A 273      -0.223  37.947  34.371  1.00  8.00      clus N  
ATOM   2123  CA  ALA A 273       0.483  37.609  33.152  1.00  8.26      clus C  
ATOM   2124  C   ALA A 273      -0.303  37.870  31.872  1.00 12.77      clus C  
ATOM   2125  O   ALA A 273       0.132  37.469  30.778  1.00 13.93      clus O  
ATOM   2126  CB  ALA A 273       0.945  36.165  33.212  1.00  2.00      clus C  
ATOM   2127  N   ALA A 274      -1.430  38.574  32.007  1.00 14.54      clus N  
ATOM   2128  CA  ALA A 274      -2.307  38.899  30.872  1.00 12.96      clus C  
ATOM   2129  C   ALA A 274      -1.841  40.119  30.067  1.00 13.72      clus C  
ATOM   2130  O   ALA A 274      -2.265  40.318  28.921  1.00 14.51      clus O  
ATOM   2131  CB  ALA A 274      -3.740  39.098  31.349  1.00  2.00      clus C  
ATOM   2132  N   TYR A 275      -0.975  40.928  30.673  1.00  9.77      clus N  
ATOM   2133  CA  TYR A 275      -0.428  42.128  30.051  1.00  8.88      clus C  
ATOM   2134  C   TYR A 275      -1.385  43.289  29.854  1.00  9.74      clus C  
ATOM   2135  O   TYR A 275      -1.438  43.897  28.789  1.00 12.18      clus O  
ATOM   2136  CB  TYR A 275       0.332  41.805  28.758  1.00  4.98      clus C  
ATOM   2137  CG  TYR A 275       1.802  42.081  28.926  1.00  9.13      clus C  
ATOM   2138  CD1 TYR A 275       2.581  41.287  29.764  1.00  8.66      clus C  
ATOM   2139  CD2 TYR A 275       2.406  43.178  28.318  1.00  2.00      clus C  
ATOM   2140  CE1 TYR A 275       3.929  41.578  30.000  1.00  4.95      clus C  
ATOM   2141  CE2 TYR A 275       3.753  43.473  28.549  1.00  2.86      clus C  
ATOM   2142  CZ  TYR A 275       4.502  42.664  29.389  1.00  8.11      clus C  
ATOM   2143  OH  TYR A 275       5.828  42.911  29.611  1.00 19.61      clus O  
ATOM   2144  N   PHE A 276      -2.111  43.598  30.920  1.00 10.28      clus N  
ATOM   2145  CA  PHE A 276      -3.062  44.697  30.957  1.00  9.01      clus C  
ATOM   2146  C   PHE A 276      -2.220  45.952  30.834  1.00 12.96      clus C  
ATOM   2147  O   PHE A 276      -1.491  46.287  31.757  1.00 14.54      clus O  
ATOM   2148  CB  PHE A 276      -3.747  44.673  32.316  1.00  9.92      clus C  
ATOM   2149  CG  PHE A 276      -4.713  45.794  32.545  1.00  7.88      clus C  
ATOM   2150  CD1 PHE A 276      -5.985  45.759  31.992  1.00 10.16      clus C  
ATOM   2151  CD2 PHE A 276      -4.389  46.833  33.405  1.00 11.00      clus C  
ATOM   2152  CE1 PHE A 276      -6.918  46.736  32.300  1.00 10.98      clus C  
ATOM   2153  CE2 PHE A 276      -5.316  47.819  33.718  1.00 16.18      clus C  
ATOM   2154  CZ  PHE A 276      -6.583  47.768  33.168  1.00 16.76      clus C  
ATOM   2155  N   GLY A 277      -2.275  46.612  29.683  1.00 12.72      clus N  
ATOM   2156  CA  GLY A 277      -1.478  47.811  29.497  1.00 15.70      clus C  
ATOM   2157  C   GLY A 277      -0.486  47.769  28.344  1.00 17.98      clus C  
ATOM   2158  O   GLY A 277       0.193  48.759  28.081  1.00 25.70      clus O  
ATOM   2159  N   PHE A 278      -0.380  46.627  27.668  1.00 16.77      clus N  
ATOM   2160  CA  PHE A 278       0.526  46.493  26.530  1.00 12.44      clus C  
ATOM   2161  C   PHE A 278       0.146  47.558  25.537  1.00 16.05      clus C  
ATOM   2162  O   PHE A 278       0.990  48.090  24.813  1.00 20.18      clus O  
ATOM   2163  CB  PHE A 278       0.374  45.120  25.864  1.00  2.00      clus C  
ATOM   2164  CG  PHE A 278       1.189  44.953  24.605  1.00  2.00      clus C  
ATOM   2165  CD1 PHE A 278       2.520  44.557  24.665  1.00  2.00      clus C  
ATOM   2166  CD2 PHE A 278       0.618  45.167  23.357  1.00  2.00      clus C  
ATOM   2167  CE1 PHE A 278       3.275  44.372  23.508  1.00  2.00      clus C  
ATOM   2168  CE2 PHE A 278       1.367  44.982  22.187  1.00  2.00      clus C  
ATOM   2169  CZ  PHE A 278       2.701  44.583  22.271  1.00  2.00      clus C  
ATOM   2170  N   SER A 279      -1.140  47.875  25.525  1.00 14.73      clus N  
ATOM   2171  CA  SER A 279      -1.663  48.868  24.627  1.00 10.48      clus C  
ATOM   2172  C   SER A 279      -2.735  49.684  25.296  1.00  8.19      clus C  
ATOM   2173  O   SER A 279      -3.610  49.144  25.949  1.00 10.59      clus O  
ATOM   2174  CB  SER A 279      -2.245  48.198  23.404  1.00 11.60      clus C  
ATOM   2175  OG  SER A 279      -2.434  49.166  22.399  1.00 33.57      clus O  
ATOM   2176  N   VAL A 280      -2.613  51.002  25.187  1.00 10.77      clus N  
ATOM   2177  CA  VAL A 280      -3.596  51.934  25.741  1.00  4.92      clus C  
ATOM   2178  C   VAL A 280      -3.925  52.935  24.627  1.00  2.00      clus C  
ATOM   2179  O   VAL A 280      -3.170  53.051  23.646  1.00  2.00      clus O  
ATOM   2180  CB  VAL A 280      -3.097  52.659  27.027  1.00  2.00      clus C  
ATOM   2181  CG1 VAL A 280      -2.540  51.666  28.003  1.00  2.00      clus C  
ATOM   2182  CG2 VAL A 280      -2.073  53.708  26.702  1.00  2.00      clus C  
ATOM   2183  N   ALA A 281      -5.078  53.589  24.755  1.00  2.00      clus N  
ATOM   2184  CA  ALA A 281      -5.551  54.552  23.774  1.00  6.20      clus C  
ATOM   2185  C   ALA A 281      -6.778  55.235  24.325  1.00 14.28      clus C  
ATOM   2186  O   ALA A 281      -7.715  54.566  24.754  1.00 19.95      clus O  
ATOM   2187  CB  ALA A 281      -5.915  53.848  22.489  1.00  4.76      clus C  
ATOM   2188  N   ALA A 282      -6.779  56.565  24.305  1.00 15.99      clus N  
ATOM   2189  CA  ALA A 282      -7.919  57.347  24.787  1.00 12.44      clus C  
ATOM   2190  C   ALA A 282      -8.647  57.944  23.588  1.00 13.85      clus C  
ATOM   2191  O   ALA A 282      -8.012  58.395  22.635  1.00 12.04      clus O  
ATOM   2192  CB  ALA A 282      -7.449  58.442  25.701  1.00 15.34      clus C  
ATOM   2193  N   THR A 283      -9.976  57.958  23.639  1.00 15.30      clus N  
ATOM   2194  CA  THR A 283     -10.783  58.488  22.538  1.00 20.32      clus C  
ATOM   2195  C   THR A 283     -12.203  58.704  23.024  1.00 22.19      clus C  
ATOM   2196  O   THR A 283     -12.605  58.084  24.011  1.00 19.12      clus O  
ATOM   2197  CB  THR A 283     -10.808  57.465  21.367  1.00 23.24      clus C  
ATOM   2198  CG2 THR A 283     -11.898  57.774  20.366  1.00 23.24      clus C  
ATOM   2199  OG1 THR A 283      -9.548  57.486  20.696  1.00 30.04      clus O  
ATOM   2200  N   ASP A 284     -12.939  59.627  22.401  1.00 28.11      clus N  
ATOM   2201  CA  ASP A 284     -14.333  59.808  22.796  1.00 29.67      clus C  
ATOM   2202  C   ASP A 284     -15.172  59.010  21.842  1.00 26.25      clus C  
ATOM   2203  O   ASP A 284     -15.509  59.460  20.753  1.00 24.34      clus O  
ATOM   2204  CB  ASP A 284     -14.807  61.249  22.784  1.00 35.99      clus C  
ATOM   2205  CG  ASP A 284     -16.262  61.362  23.202  1.00 38.70      clus C  
ATOM   2206  OD1 ASP A 284     -16.942  62.288  22.721  1.00 43.48      clus O  
ATOM   2207  OD2 ASP A 284     -16.727  60.507  23.992  1.00 28.46      clus O1-
ATOM   2208  N   ILE A 285     -15.563  57.843  22.322  1.00 31.70      clus N  
ATOM   2209  CA  ILE A 285     -16.322  56.871  21.561  1.00 27.86      clus C  
ATOM   2210  C   ILE A 285     -17.849  57.065  21.528  1.00 28.68      clus C  
ATOM   2211  O   ILE A 285     -18.523  56.484  20.678  1.00 28.73      clus O  
ATOM   2212  CB  ILE A 285     -15.933  55.455  22.066  1.00 12.89      clus C  
ATOM   2213  CG1 ILE A 285     -15.927  54.459  20.914  1.00  5.22      clus C  
ATOM   2214  CG2 ILE A 285     -16.796  55.049  23.249  1.00  4.92      clus C  
ATOM   2215  CD1 ILE A 285     -14.950  54.796  19.826  1.00  2.00      clus C  
ATOM   2216  N   ASN A 286     -18.382  57.939  22.378  1.00 27.96      clus N  
ATOM   2217  CA  ASN A 286     -19.827  58.146  22.418  1.00 27.08      clus C  
ATOM   2218  C   ASN A 286     -20.354  59.591  22.271  1.00 31.27      clus C  
ATOM   2219  O   ASN A 286     -21.380  59.951  22.862  1.00 33.02      clus O  
ATOM   2220  CB  ASN A 286     -20.382  57.516  23.687  1.00 17.37      clus C  
ATOM   2221  CG  ASN A 286     -19.928  58.241  24.936  1.00 13.28      clus C  
ATOM   2222  ND2 ASN A 286     -20.682  58.087  26.011  1.00 11.52      clus N  
ATOM   2223  OD1 ASN A 286     -18.924  58.950  24.929  1.00 15.57      clus O  
ATOM   2224  N   GLY A 287     -19.654  60.408  21.484  1.00 33.88      clus N  
ATOM   2225  CA  GLY A 287     -20.069  61.786  21.236  1.00 37.51      clus C  
ATOM   2226  C   GLY A 287     -20.550  62.691  22.368  1.00 40.21      clus C  
ATOM   2227  O   GLY A 287     -21.309  63.631  22.107  1.00 39.45      clus O  
ATOM   2228  N   ASP A 288     -20.133  62.427  23.609  1.00 39.98      clus N  
ATOM   2229  CA  ASP A 288     -20.530  63.261  24.751  1.00 42.04      clus C  
ATOM   2230  C   ASP A 288     -19.413  64.237  25.091  1.00 45.40      clus C  
ATOM   2231  O   ASP A 288     -19.521  65.036  26.020  1.00 49.51      clus O  
ATOM   2232  CB  ASP A 288     -20.861  62.403  25.979  1.00 42.09      clus C  
ATOM   2233  CG  ASP A 288     -19.636  61.767  26.607  1.00 39.50      clus C  
ATOM   2234  OD1 ASP A 288     -19.699  61.435  27.814  1.00 36.13      clus O  
ATOM   2235  OD2 ASP A 288     -18.623  61.591  25.897  1.00 36.53      clus O1-
ATOM   2236  N   ASP A 289     -18.329  64.113  24.336  1.00 47.13      clus N  
ATOM   2237  CA  ASP A 289     -17.135  64.930  24.463  1.00 49.10      clus C  
ATOM   2238  C   ASP A 289     -16.376  64.707  25.758  1.00 44.79      clus C  
ATOM   2239  O   ASP A 289     -16.084  65.643  26.501  1.00 43.51      clus O  
ATOM   2240  CB  ASP A 289     -17.449  66.410  24.250  1.00 61.84      clus C  
ATOM   2241  CG  ASP A 289     -16.405  67.106  23.386  1.00 75.61      clus C  
ATOM   2242  OD1 ASP A 289     -16.269  68.346  23.506  1.00 83.37      clus O  
ATOM   2243  OD2 ASP A 289     -15.719  66.416  22.587  1.00 82.67      clus O1-
ATOM   2244  N   TYR A 290     -16.067  63.437  26.007  1.00 43.43      clus N  
ATOM   2245  CA  TYR A 290     -15.317  62.980  27.173  1.00 35.70      clus C  
ATOM   2246  C   TYR A 290     -14.469  61.822  26.683  1.00 31.16      clus C  
ATOM   2247  O   TYR A 290     -14.965  60.909  26.019  1.00 28.85      clus O  
ATOM   2248  CB  TYR A 290     -16.250  62.476  28.267  1.00 36.01      clus C  
ATOM   2249  CG  TYR A 290     -16.775  63.547  29.177  1.00 44.92      clus C  
ATOM   2250  CD1 TYR A 290     -17.905  63.319  29.955  1.00 56.33      clus C  
ATOM   2251  CD2 TYR A 290     -16.122  64.770  29.303  1.00 48.58      clus C  
ATOM   2252  CE1 TYR A 290     -18.374  64.276  30.842  1.00 57.63      clus C  
ATOM   2253  CE2 TYR A 290     -16.582  65.738  30.188  1.00 53.94      clus C  
ATOM   2254  CZ  TYR A 290     -17.710  65.477  30.957  1.00 57.14      clus C  
ATOM   2255  OH  TYR A 290     -18.167  66.400  31.865  1.00 58.42      clus O  
ATOM   2256  N   ALA A 291     -13.184  61.862  26.986  1.00 22.96      clus N  
ATOM   2257  CA  ALA A 291     -12.314  60.796  26.544  1.00 19.13      clus C  
ATOM   2258  C   ALA A 291     -12.635  59.482  27.248  1.00 16.45      clus C  
ATOM   2259  O   ALA A 291     -12.961  59.450  28.435  1.00  2.47      clus O  
ATOM   2260  CB  ALA A 291     -10.882  61.178  26.764  1.00 28.17      clus C  
ATOM   2261  N   ASP A 292     -12.548  58.400  26.484  1.00 17.03      clus N  
ATOM   2262  CA  ASP A 292     -12.810  57.063  26.983  1.00 17.76      clus C  
ATOM   2263  C   ASP A 292     -11.525  56.261  26.915  1.00 20.12      clus C  
ATOM   2264  O   ASP A 292     -10.834  56.274  25.897  1.00 17.01      clus O  
ATOM   2265  CB  ASP A 292     -13.890  56.418  26.131  1.00 17.07      clus C  
ATOM   2266  CG  ASP A 292     -15.158  57.218  26.128  1.00 12.04      clus C  
ATOM   2267  OD1 ASP A 292     -15.460  57.868  25.109  1.00  2.18      clus O  
ATOM   2268  OD2 ASP A 292     -15.830  57.228  27.176  1.00 18.95      clus O1-
ATOM   2269  N   VAL A 293     -11.194  55.594  28.020  1.00 19.04      clus N  
ATOM   2270  CA  VAL A 293      -9.970  54.798  28.115  1.00 17.37      clus C  
ATOM   2271  C   VAL A 293     -10.145  53.385  27.598  1.00 17.42      clus C  
ATOM   2272  O   VAL A 293     -11.143  52.727  27.858  1.00 23.02      clus O  
ATOM   2273  CB  VAL A 293      -9.419  54.714  29.560  1.00 10.10      clus C  
ATOM   2274  CG1 VAL A 293      -8.051  54.080  29.532  1.00 21.22      clus C  
ATOM   2275  CG2 VAL A 293      -9.317  56.083  30.190  1.00  2.00      clus C  
ATOM   2276  N   PHE A 294      -9.123  52.916  26.902  1.00 16.41      clus N  
ATOM   2277  CA  PHE A 294      -9.125  51.591  26.322  1.00 20.65      clus C  
ATOM   2278  C   PHE A 294      -7.786  50.902  26.592  1.00 15.87      clus C  
ATOM   2279  O   PHE A 294      -6.780  51.278  26.001  1.00 23.16      clus O  
ATOM   2280  CB  PHE A 294      -9.332  51.711  24.813  1.00 21.94      clus C  
ATOM   2281  CG  PHE A 294     -10.593  52.426  24.419  1.00 24.45      clus C  
ATOM   2282  CD1 PHE A 294     -10.691  53.802  24.517  1.00 21.71      clus C  
ATOM   2283  CD2 PHE A 294     -11.668  51.722  23.899  1.00 28.93      clus C  
ATOM   2284  CE1 PHE A 294     -11.845  54.466  24.097  1.00 27.33      clus C  
ATOM   2285  CE2 PHE A 294     -12.821  52.375  23.479  1.00 30.11      clus C  
ATOM   2286  CZ  PHE A 294     -12.909  53.750  23.576  1.00 25.68      clus C  
ATOM   2287  N   ILE A 295      -7.766  49.914  27.489  1.00 11.15      clus N  
ATOM   2288  CA  ILE A 295      -6.528  49.180  27.806  1.00  5.22      clus C  
ATOM   2289  C   ILE A 295      -6.495  47.834  27.073  1.00  6.83      clus C  
ATOM   2290  O   ILE A 295      -7.539  47.281  26.750  1.00 13.74      clus O  
ATOM   2291  CB  ILE A 295      -6.356  48.920  29.321  1.00  6.73      clus C  
ATOM   2292  CG1 ILE A 295      -6.577  50.199  30.137  1.00  7.90      clus C  
ATOM   2293  CG2 ILE A 295      -4.961  48.396  29.590  1.00  5.69      clus C  
ATOM   2294  CD1 ILE A 295      -8.041  50.566  30.362  1.00  7.85      clus C  
ATOM   2295  N   GLY A 296      -5.307  47.296  26.825  1.00  2.00      clus N  
ATOM   2296  CA  GLY A 296      -5.215  46.041  26.105  1.00  2.00      clus C  
ATOM   2297  C   GLY A 296      -4.454  44.956  26.839  1.00  8.89      clus C  
ATOM   2298  O   GLY A 296      -3.367  45.198  27.355  1.00  8.34      clus O  
ATOM   2299  N   ALA A 297      -5.054  43.765  26.914  1.00 15.56      clus N  
ATOM   2300  CA  ALA A 297      -4.466  42.585  27.564  1.00  5.70      clus C  
ATOM   2301  C   ALA A 297      -4.530  41.476  26.513  1.00  3.72      clus C  
ATOM   2302  O   ALA A 297      -5.451  40.672  26.496  1.00  2.00      clus O  
ATOM   2303  CB  ALA A 297      -5.259  42.212  28.813  1.00  2.00      clus C  
ATOM   2304  N   PRO A 298      -3.562  41.460  25.590  1.00  8.14      clus N  
ATOM   2305  CA  PRO A 298      -3.509  40.465  24.517  1.00 11.05      clus C  
ATOM   2306  C   PRO A 298      -3.244  39.007  24.939  1.00 11.25      clus C  
ATOM   2307  O   PRO A 298      -3.256  38.087  24.108  1.00 12.04      clus O  
ATOM   2308  CB  PRO A 298      -2.439  41.044  23.578  1.00  6.78      clus C  
ATOM   2309  CG  PRO A 298      -1.522  41.749  24.507  1.00  2.00      clus C  
ATOM   2310  CD  PRO A 298      -2.458  42.431  25.460  1.00  2.00      clus C  
ATOM   2311  N   LEU A 299      -3.045  38.787  26.229  1.00  7.15      clus N  
ATOM   2312  CA  LEU A 299      -2.797  37.435  26.733  1.00 12.81      clus C  
ATOM   2313  C   LEU A 299      -3.831  36.991  27.781  1.00  9.85      clus C  
ATOM   2314  O   LEU A 299      -3.585  36.042  28.527  1.00 12.86      clus O  
ATOM   2315  CB  LEU A 299      -1.392  37.352  27.339  1.00  7.95      clus C  
ATOM   2316  CG  LEU A 299      -0.214  36.985  26.452  1.00  2.00      clus C  
ATOM   2317  CD1 LEU A 299      -0.304  37.636  25.125  1.00  2.00      clus C  
ATOM   2318  CD2 LEU A 299       1.050  37.375  27.155  1.00  2.00      clus C  
ATOM   2319  N   PHE A 300      -4.970  37.681  27.833  1.00  6.39      clus N  
ATOM   2320  CA  PHE A 300      -6.034  37.390  28.791  1.00  2.38      clus C  
ATOM   2321  C   PHE A 300      -6.646  36.041  28.518  1.00  3.65      clus C  
ATOM   2322  O   PHE A 300      -6.784  35.628  27.365  1.00  3.76      clus O  
ATOM   2323  CB  PHE A 300      -7.133  38.455  28.709  1.00 10.09      clus C  
ATOM   2324  CG  PHE A 300      -8.205  38.330  29.774  1.00 12.39      clus C  
ATOM   2325  CD1 PHE A 300      -8.022  38.898  31.031  1.00  9.63      clus C  
ATOM   2326  CD2 PHE A 300      -9.408  37.685  29.502  1.00 12.98      clus C  
ATOM   2327  CE1 PHE A 300      -9.016  38.830  31.997  1.00  7.55      clus C  
ATOM   2328  CE2 PHE A 300     -10.402  37.613  30.459  1.00 12.72      clus C  
ATOM   2329  CZ  PHE A 300     -10.209  38.189  31.710  1.00  9.24      clus C  
ATOM   2330  N   MET A 301      -7.037  35.367  29.590  1.00  5.01      clus N  
ATOM   2331  CA  MET A 301      -7.633  34.061  29.460  1.00  5.21      clus C  
ATOM   2332  C   MET A 301      -9.041  34.060  29.977  1.00 11.24      clus C  
ATOM   2333  O   MET A 301      -9.277  34.321  31.160  1.00 14.57      clus O  
ATOM   2334  CB  MET A 301      -6.785  33.003  30.167  1.00  2.00      clus C  
ATOM   2335  CG  MET A 301      -5.473  32.747  29.451  1.00  2.00      clus C  
ATOM   2336  SD  MET A 301      -4.451  31.426  30.066  1.00 15.82      clus S  
ATOM   2337  CE  MET A 301      -4.393  31.766  31.818  1.00  2.00      clus C  
ATOM   2338  N   ASP A 302      -9.982  33.885  29.053  1.00 14.64      clus N  
ATOM   2339  CA  ASP A 302     -11.396  33.824  29.404  1.00 22.97      clus C  
ATOM   2340  C   ASP A 302     -11.716  32.355  29.381  1.00 28.56      clus C  
ATOM   2341  O   ASP A 302     -10.881  31.554  28.958  1.00 29.49      clus O  
ATOM   2342  CB  ASP A 302     -12.280  34.578  28.397  1.00 20.41      clus C  
ATOM   2343  CG  ASP A 302     -12.301  33.943  26.991  1.00 21.00      clus C  
ATOM   2344  OD1 ASP A 302     -11.596  32.938  26.712  1.00 22.08      clus O  
ATOM   2345  OD2 ASP A 302     -13.049  34.478  26.140  1.00 14.69      clus O1-
ATOM   2346  N   ARG A 303     -12.919  31.995  29.801  1.00 28.07      clus N  
ATOM   2347  CA  ARG A 303     -13.307  30.596  29.800  1.00 23.11      clus C  
ATOM   2348  C   ARG A 303     -14.090  30.262  28.546  1.00 24.45      clus C  
ATOM   2349  O   ARG A 303     -15.068  30.938  28.224  1.00 24.74      clus O  
ATOM   2350  CB  ARG A 303     -14.158  30.298  31.021  1.00 25.15      clus C  
ATOM   2351  CG  ARG A 303     -13.415  29.669  32.179  1.00 25.43      clus C  
ATOM   2352  CD  ARG A 303     -12.241  30.490  32.635  1.00 13.85      clus C  
ATOM   2353  NE  ARG A 303     -11.903  30.190  34.020  1.00 24.51      clus N  
ATOM   2354  CZ  ARG A 303     -11.635  28.978  34.504  1.00 22.30      clus C  
ATOM   2355  NH1 ARG A 303     -11.652  27.907  33.720  1.00 30.14      clus N1+
ATOM   2356  NH2 ARG A 303     -11.366  28.837  35.790  1.00 28.61      clus N  
ATOM   2357  N   GLY A 304     -13.646  29.241  27.819  1.00 24.19      clus N  
ATOM   2358  CA  GLY A 304     -14.355  28.840  26.616  1.00 35.46      clus C  
ATOM   2359  C   GLY A 304     -15.693  28.227  26.988  1.00 39.20      clus C  
ATOM   2360  O   GLY A 304     -16.031  28.156  28.167  1.00 42.95      clus O  
ATOM   2361  N   SER A 305     -16.450  27.760  26.004  1.00 40.16      clus N  
ATOM   2362  CA  SER A 305     -17.754  27.159  26.273  1.00 37.45      clus C  
ATOM   2363  C   SER A 305     -17.662  26.070  27.327  1.00 34.62      clus C  
ATOM   2364  O   SER A 305     -18.492  25.992  28.245  1.00 29.45      clus O  
ATOM   2365  CB  SER A 305     -18.333  26.567  24.990  1.00 45.99      clus C  
ATOM   2366  OG  SER A 305     -19.558  25.903  25.242  1.00 61.50      clus O  
ATOM   2367  N   ASP A 306     -16.625  25.251  27.182  1.00 34.98      clus N  
ATOM   2368  CA  ASP A 306     -16.355  24.131  28.072  1.00 30.04      clus C  
ATOM   2369  C   ASP A 306     -15.824  24.572  29.422  1.00 19.82      clus C  
ATOM   2370  O   ASP A 306     -15.501  23.734  30.262  1.00 21.70      clus O  
ATOM   2371  CB  ASP A 306     -15.373  23.156  27.409  1.00 39.18      clus C  
ATOM   2372  CG  ASP A 306     -14.002  23.771  27.165  1.00 50.15      clus C  
ATOM   2373  OD1 ASP A 306     -13.919  24.978  26.836  1.00 50.63      clus O  
ATOM   2374  OD2 ASP A 306     -13.001  23.033  27.297  1.00 57.22      clus O1-
ATOM   2375  N   GLY A 307     -15.698  25.886  29.605  1.00 13.67      clus N  
ATOM   2376  CA  GLY A 307     -15.235  26.443  30.866  1.00 12.91      clus C  
ATOM   2377  C   GLY A 307     -13.776  26.243  31.212  1.00 13.58      clus C  
ATOM   2378  O   GLY A 307     -13.393  26.370  32.377  1.00  6.04      clus O  
ATOM   2379  N   LYS A 308     -12.983  25.910  30.193  1.00 22.73      clus N  
ATOM   2380  CA  LYS A 308     -11.539  25.686  30.312  1.00 23.70      clus C  
ATOM   2381  C   LYS A 308     -10.849  26.969  29.834  1.00 27.45      clus C  
ATOM   2382  O   LYS A 308     -11.172  27.466  28.751  1.00 30.16      clus O  
ATOM   2383  CB  LYS A 308     -11.134  24.497  29.421  1.00 26.78      clus C  
ATOM   2384  CG  LYS A 308      -9.668  24.097  29.486  1.00 39.21      clus C  
ATOM   2385  CD  LYS A 308      -9.380  22.834  28.673  1.00 44.97      clus C  
ATOM   2386  CE  LYS A 308      -9.958  21.589  29.351  1.00 54.29      clus C  
ATOM   2387  NZ  LYS A 308      -9.911  20.359  28.493  1.00 64.67      clus N1+
ATOM   2388  N   LEU A 309      -9.939  27.511  30.652  1.00 17.15      clus N  
ATOM   2389  CA  LEU A 309      -9.187  28.740  30.339  1.00 11.32      clus C  
ATOM   2390  C   LEU A 309      -8.663  28.785  28.905  1.00 18.95      clus C  
ATOM   2391  O   LEU A 309      -8.136  27.789  28.403  1.00 24.90      clus O  
ATOM   2392  CB  LEU A 309      -7.993  28.896  31.285  1.00  2.74      clus C  
ATOM   2393  CG  LEU A 309      -8.230  29.303  32.734  1.00  2.00      clus C  
ATOM   2394  CD1 LEU A 309      -7.041  28.968  33.588  1.00  2.00      clus C  
ATOM   2395  CD2 LEU A 309      -8.526  30.771  32.791  1.00  6.06      clus C  
ATOM   2396  N   GLN A 310      -8.782  29.956  28.276  1.00 21.94      clus N  
ATOM   2397  CA  GLN A 310      -8.347  30.198  26.894  1.00 21.50      clus C  
ATOM   2398  C   GLN A 310      -7.602  31.521  26.785  1.00 27.19      clus C  
ATOM   2399  O   GLN A 310      -8.107  32.557  27.220  1.00 28.84      clus O  
ATOM   2400  CB  GLN A 310      -9.554  30.320  25.963  1.00 15.31      clus C  
ATOM   2401  CG  GLN A 310     -10.165  29.037  25.470  1.00 23.96      clus C  
ATOM   2402  CD  GLN A 310     -11.213  29.307  24.417  1.00 27.32      clus C  
ATOM   2403  NE2 GLN A 310     -12.068  30.292  24.688  1.00 23.75      clus N  
ATOM   2404  OE1 GLN A 310     -11.237  28.667  23.355  1.00 24.91      clus O  
ATOM   2405  N   GLU A 311      -6.429  31.506  26.168  1.00 23.55      clus N  
ATOM   2406  CA  GLU A 311      -5.691  32.745  25.993  1.00 16.89      clus C  
ATOM   2407  C   GLU A 311      -6.167  33.335  24.661  1.00  8.86      clus C  
ATOM   2408  O   GLU A 311      -5.724  32.905  23.603  1.00  2.00      clus O  
ATOM   2409  CB  GLU A 311      -4.175  32.466  25.979  1.00 22.96      clus C  
ATOM   2410  CG  GLU A 311      -3.242  33.699  26.032  1.00 13.75      clus C  
ATOM   2411  CD  GLU A 311      -2.329  33.804  24.808  1.00 17.23      clus C  
ATOM   2412  OE1 GLU A 311      -2.588  34.664  23.937  1.00 26.22      clus O  
ATOM   2413  OE2 GLU A 311      -1.358  33.026  24.702  1.00 11.51      clus O1-
ATOM   2414  N   VAL A 312      -7.125  34.266  24.720  1.00  7.93      clus N  
ATOM   2415  CA  VAL A 312      -7.664  34.923  23.511  1.00 13.52      clus C  
ATOM   2416  C   VAL A 312      -7.530  36.449  23.436  1.00 10.80      clus C  
ATOM   2417  O   VAL A 312      -7.791  37.033  22.382  1.00  7.55      clus O  
ATOM   2418  CB  VAL A 312      -9.151  34.594  23.264  1.00  5.68      clus C  
ATOM   2419  CG1 VAL A 312      -9.317  33.140  22.985  1.00  2.00      clus C  
ATOM   2420  CG2 VAL A 312     -10.000  35.040  24.435  1.00  2.17      clus C  
ATOM   2421  N   GLY A 313      -7.188  37.092  24.552  1.00 16.12      clus N  
ATOM   2422  CA  GLY A 313      -7.031  38.543  24.573  1.00 15.56      clus C  
ATOM   2423  C   GLY A 313      -8.255  39.319  25.035  1.00 17.89      clus C  
ATOM   2424  O   GLY A 313      -9.382  38.896  24.788  1.00 20.08      clus O  
ATOM   2425  N   GLN A 314      -8.044  40.474  25.665  1.00 17.87      clus N  
ATOM   2426  CA  GLN A 314      -9.162  41.280  26.154  1.00 13.53      clus C  
ATOM   2427  C   GLN A 314      -8.902  42.780  26.250  1.00 14.10      clus C  
ATOM   2428  O   GLN A 314      -7.889  43.216  26.789  1.00 16.51      clus O  
ATOM   2429  CB  GLN A 314      -9.612  40.778  27.525  1.00  4.63      clus C  
ATOM   2430  CG  GLN A 314     -10.785  41.540  28.093  1.00 10.25      clus C  
ATOM   2431  CD  GLN A 314     -11.197  41.027  29.440  1.00 23.09      clus C  
ATOM   2432  NE2 GLN A 314     -11.791  39.846  29.456  1.00 25.76      clus N  
ATOM   2433  OE1 GLN A 314     -10.980  41.675  30.462  1.00 26.44      clus O  
ATOM   2434  N   VAL A 315      -9.878  43.562  25.801  1.00 12.14      clus N  
ATOM   2435  CA  VAL A 315      -9.784  45.016  25.841  1.00  9.46      clus C  
ATOM   2436  C   VAL A 315     -10.789  45.633  26.821  1.00 15.64      clus C  
ATOM   2437  O   VAL A 315     -11.988  45.324  26.774  1.00 11.89      clus O  
ATOM   2438  CB  VAL A 315      -9.991  45.614  24.438  1.00  6.09      clus C  
ATOM   2439  CG1 VAL A 315      -9.921  47.143  24.478  1.00  4.45      clus C  
ATOM   2440  CG2 VAL A 315      -8.934  45.073  23.514  1.00  7.87      clus C  
ATOM   2441  N   SER A 316     -10.284  46.488  27.713  1.00 16.11      clus N  
ATOM   2442  CA  SER A 316     -11.109  47.161  28.709  1.00 17.97      clus C  
ATOM   2443  C   SER A 316     -11.517  48.574  28.278  1.00 21.07      clus C  
ATOM   2444  O   SER A 316     -10.706  49.508  28.290  1.00 25.22      clus O  
ATOM   2445  CB  SER A 316     -10.387  47.202  30.055  1.00 21.34      clus C  
ATOM   2446  OG  SER A 316     -11.087  47.995  30.996  1.00 22.42      clus O  
ATOM   2447  N   VAL A 317     -12.803  48.709  27.950  1.00 16.75      clus N  
ATOM   2448  CA  VAL A 317     -13.430  49.950  27.504  1.00  8.15      clus C  
ATOM   2449  C   VAL A 317     -14.064  50.752  28.648  1.00 11.01      clus C  
ATOM   2450  O   VAL A 317     -15.238  50.541  28.979  1.00 13.41      clus O  
ATOM   2451  CB  VAL A 317     -14.523  49.620  26.510  1.00  2.00      clus C  
ATOM   2452  CG1 VAL A 317     -15.153  50.885  25.964  1.00 13.95      clus C  
ATOM   2453  CG2 VAL A 317     -13.954  48.797  25.413  1.00  2.00      clus C  
ATOM   2454  N   SER A 318     -13.313  51.712  29.193  1.00 13.97      clus N  
ATOM   2455  CA  SER A 318     -13.779  52.547  30.308  1.00 21.24      clus C  
ATOM   2456  C   SER A 318     -14.363  53.899  29.863  1.00 26.74      clus C  
ATOM   2457  O   SER A 318     -13.627  54.844  29.553  1.00 21.88      clus O  
ATOM   2458  CB  SER A 318     -12.627  52.768  31.279  1.00 18.44      clus C  
ATOM   2459  OG  SER A 318     -11.767  51.641  31.279  1.00 21.37      clus O  
ATOM   2460  N   LEU A 319     -15.694  53.985  29.840  1.00 33.02      clus N  
ATOM   2461  CA  LEU A 319     -16.394  55.211  29.434  1.00 34.23      clus C  
ATOM   2462  C   LEU A 319     -16.349  56.258  30.546  1.00 37.28      clus C  
ATOM   2463  O   LEU A 319     -16.790  55.994  31.663  1.00 40.28      clus O  
ATOM   2464  CB  LEU A 319     -17.869  54.923  29.067  1.00 36.12      clus C  
ATOM   2465  CG  LEU A 319     -18.314  54.055  27.873  1.00 35.58      clus C  
ATOM   2466  CD1 LEU A 319     -17.429  54.322  26.685  1.00 45.82      clus C  
ATOM   2467  CD2 LEU A 319     -18.281  52.570  28.205  1.00 40.10      clus C  
ATOM   2468  N   GLN A 320     -15.813  57.438  30.241  1.00 39.62      clus N  
ATOM   2469  CA  GLN A 320     -15.724  58.522  31.225  1.00 39.58      clus C  
ATOM   2470  C   GLN A 320     -17.069  59.177  31.477  1.00 44.80      clus C  
ATOM   2471  O   GLN A 320     -17.667  59.768  30.573  1.00 46.39      clus O  
ATOM   2472  CB  GLN A 320     -14.733  59.593  30.777  1.00 43.25      clus C  
ATOM   2473  CG  GLN A 320     -14.631  60.768  31.735  1.00 38.71      clus C  
ATOM   2474  CD  GLN A 320     -13.436  61.647  31.451  1.00 33.28      clus C  
ATOM   2475  NE2 GLN A 320     -12.891  62.257  32.498  1.00 29.64      clus N  
ATOM   2476  OE1 GLN A 320     -13.000  61.773  30.306  1.00 34.89      clus O  
ATOM   2477  N   ARG A 321     -17.523  59.093  32.722  1.00 47.52      clus N  
ATOM   2478  CA  ARG A 321     -18.799  59.669  33.115  1.00 50.59      clus C  
ATOM   2479  C   ARG A 321     -18.561  61.109  33.540  1.00 52.47      clus C  
ATOM   2480  O   ARG A 321     -17.416  61.552  33.641  1.00 50.48      clus O  
ATOM   2481  CB  ARG A 321     -19.394  58.874  34.281  1.00 58.66      clus C  
ATOM   2482  CG  ARG A 321     -20.916  58.810  34.306  1.00 66.92      clus C  
ATOM   2483  CD  ARG A 321     -21.471  57.635  33.489  1.00 71.49      clus C  
ATOM   2484  NE  ARG A 321     -21.360  57.814  32.040  1.00 69.84      clus N  
ATOM   2485  CZ  ARG A 321     -22.225  57.314  31.159  1.00 67.68      clus C  
ATOM   2486  NH1 ARG A 321     -23.264  56.607  31.585  1.00 62.26      clus N1+
ATOM   2487  NH2 ARG A 321     -22.052  57.509  29.858  1.00 62.28      clus N  
ATOM   2488  N   ALA A 322     -19.650  61.830  33.794  1.00 56.38      clus N  
ATOM   2489  CA  ALA A 322     -19.591  63.230  34.217  1.00 59.02      clus C  
ATOM   2490  C   ALA A 322     -18.848  63.431  35.547  1.00 57.09      clus C  
ATOM   2491  O   ALA A 322     -17.918  64.233  35.635  1.00 53.12      clus O  
ATOM   2492  CB  ALA A 322     -21.008  63.793  34.320  1.00 65.36      clus C  
ATOM   2493  N   SER A 323     -19.263  62.680  36.565  1.00 59.23      clus N  
ATOM   2494  CA  SER A 323     -18.700  62.732  37.920  1.00 64.32      clus C  
ATOM   2495  C   SER A 323     -17.172  62.650  38.090  1.00 68.79      clus C  
ATOM   2496  O   SER A 323     -16.650  62.956  39.168  1.00 68.06      clus O  
ATOM   2497  CB  SER A 323     -19.344  61.633  38.764  1.00 62.09      clus C  
ATOM   2498  OG  SER A 323     -19.225  60.378  38.118  1.00 54.25      clus O  
ATOM   2499  N   GLY A 324     -16.464  62.230  37.041  1.00 73.21      clus N  
ATOM   2500  CA  GLY A 324     -15.016  62.098  37.116  1.00 74.38      clus C  
ATOM   2501  C   GLY A 324     -14.596  60.638  37.051  1.00 76.39      clus C  
ATOM   2502  O   GLY A 324     -13.510  60.323  36.555  1.00 75.99      clus O  
ATOM   2503  N   ASP A 325     -15.459  59.755  37.569  1.00 73.18      clus N  
ATOM   2504  CA  ASP A 325     -15.224  58.306  37.570  1.00 69.85      clus C  
ATOM   2505  C   ASP A 325     -15.640  57.648  36.243  1.00 62.99      clus C  
ATOM   2506  O   ASP A 325     -16.216  58.297  35.364  1.00 65.39      clus O  
ATOM   2507  CB  ASP A 325     -15.928  57.626  38.757  1.00 75.13      clus C  
ATOM   2508  CG  ASP A 325     -17.440  57.806  38.740  1.00 79.85      clus C  
ATOM   2509  OD1 ASP A 325     -18.107  57.270  37.825  1.00 82.76      clus O  
ATOM   2510  OD2 ASP A 325     -17.961  58.468  39.666  1.00 81.33      clus O1-
ATOM   2511  N   PHE A 326     -15.400  56.346  36.128  1.00 49.47      clus N  
ATOM   2512  CA  PHE A 326     -15.699  55.637  34.895  1.00 42.47      clus C  
ATOM   2513  C   PHE A 326     -16.740  54.527  34.976  1.00 39.84      clus C  
ATOM   2514  O   PHE A 326     -17.163  54.109  36.059  1.00 44.00      clus O  
ATOM   2515  CB  PHE A 326     -14.403  55.053  34.306  1.00 39.57      clus C  
ATOM   2516  CG  PHE A 326     -13.358  56.089  33.953  1.00 32.67      clus C  
ATOM   2517  CD1 PHE A 326     -12.551  56.649  34.935  1.00 28.38      clus C  
ATOM   2518  CD2 PHE A 326     -13.189  56.506  32.640  1.00 28.56      clus C  
ATOM   2519  CE1 PHE A 326     -11.602  57.606  34.616  1.00 20.43      clus C  
ATOM   2520  CE2 PHE A 326     -12.241  57.463  32.315  1.00 26.20      clus C  
ATOM   2521  CZ  PHE A 326     -11.447  58.016  33.307  1.00 21.93      clus C  
ATOM   2522  N   GLN A 327     -17.118  54.053  33.790  1.00 38.92      clus N  
ATOM   2523  CA  GLN A 327     -18.073  52.966  33.594  1.00 38.35      clus C  
ATOM   2524  C   GLN A 327     -17.404  52.013  32.586  1.00 33.70      clus C  
ATOM   2525  O   GLN A 327     -17.449  52.227  31.370  1.00 23.22      clus O  
ATOM   2526  CB  GLN A 327     -19.383  53.504  33.021  1.00 46.53      clus C  
ATOM   2527  CG  GLN A 327     -20.426  52.431  32.816  1.00 55.66      clus C  
ATOM   2528  CD  GLN A 327     -21.365  52.753  31.681  1.00 69.44      clus C  
ATOM   2529  NE2 GLN A 327     -22.119  53.835  31.834  1.00 74.32      clus N  
ATOM   2530  OE1 GLN A 327     -21.410  52.043  30.668  1.00 73.47      clus O  
ATOM   2531  N   THR A 328     -16.792  50.955  33.108  1.00 28.84      clus N  
ATOM   2532  CA  THR A 328     -16.060  50.004  32.283  1.00 27.49      clus C  
ATOM   2533  C   THR A 328     -16.764  48.707  31.943  1.00 27.73      clus C  
ATOM   2534  O   THR A 328     -17.622  48.225  32.676  1.00 30.98      clus O  
ATOM   2535  CB  THR A 328     -14.719  49.663  32.933  1.00 25.08      clus C  
ATOM   2536  CG2 THR A 328     -13.872  48.830  32.006  1.00 17.24      clus C  
ATOM   2537  OG1 THR A 328     -14.021  50.879  33.239  1.00 37.24      clus O  
ATOM   2538  N   THR A 329     -16.354  48.135  30.822  1.00 25.27      clus N  
ATOM   2539  CA  THR A 329     -16.890  46.884  30.319  1.00 19.72      clus C  
ATOM   2540  C   THR A 329     -15.666  46.097  29.792  1.00 23.53      clus C  
ATOM   2541  O   THR A 329     -14.527  46.560  29.905  1.00 26.20      clus O  
ATOM   2542  CB  THR A 329     -17.901  47.156  29.149  1.00 17.04      clus C  
ATOM   2543  CG2 THR A 329     -18.744  48.406  29.418  1.00 12.95      clus C  
ATOM   2544  OG1 THR A 329     -17.187  47.378  27.924  1.00 22.02      clus O  
ATOM   2545  N   LYS A 330     -15.884  44.892  29.270  1.00 21.27      clus N  
ATOM   2546  CA  LYS A 330     -14.788  44.098  28.718  1.00 16.76      clus C  
ATOM   2547  C   LYS A 330     -15.166  43.745  27.302  1.00 17.11      clus C  
ATOM   2548  O   LYS A 330     -16.248  44.090  26.839  1.00 25.39      clus O  
ATOM   2549  CB  LYS A 330     -14.545  42.812  29.514  1.00 15.67      clus C  
ATOM   2550  CG  LYS A 330     -14.216  43.020  30.994  1.00 23.34      clus C  
ATOM   2551  CD  LYS A 330     -13.011  43.920  31.199  1.00 20.50      clus C  
ATOM   2552  CE  LYS A 330     -12.909  44.417  32.643  1.00 24.02      clus C  
ATOM   2553  NZ  LYS A 330     -12.613  43.362  33.660  1.00 20.24      clus N1+
ATOM   2554  N   LEU A 331     -14.278  43.038  26.622  1.00 19.77      clus N  
ATOM   2555  CA  LEU A 331     -14.497  42.636  25.237  1.00 16.93      clus C  
ATOM   2556  C   LEU A 331     -13.350  41.691  24.870  1.00 17.52      clus C  
ATOM   2557  O   LEU A 331     -12.191  42.101  24.714  1.00 18.06      clus O  
ATOM   2558  CB  LEU A 331     -14.535  43.884  24.350  1.00 13.97      clus C  
ATOM   2559  CG  LEU A 331     -14.429  43.841  22.826  1.00 16.11      clus C  
ATOM   2560  CD1 LEU A 331     -15.334  42.787  22.196  1.00 24.00      clus C  
ATOM   2561  CD2 LEU A 331     -14.766  45.213  22.317  1.00  4.01      clus C  
ATOM   2562  N   ASN A 332     -13.679  40.410  24.782  1.00 14.60      clus N  
ATOM   2563  CA  ASN A 332     -12.692  39.386  24.503  1.00 12.98      clus C  
ATOM   2564  C   ASN A 332     -12.449  39.120  23.034  1.00 15.21      clus C  
ATOM   2565  O   ASN A 332     -13.203  39.568  22.172  1.00 17.54      clus O  
ATOM   2566  CB  ASN A 332     -13.096  38.093  25.204  1.00  6.06      clus C  
ATOM   2567  CG  ASN A 332     -13.405  38.301  26.673  1.00  4.99      clus C  
ATOM   2568  ND2 ASN A 332     -12.637  37.657  27.538  1.00 15.29      clus N  
ATOM   2569  OD1 ASN A 332     -14.317  39.036  27.026  1.00  6.10      clus O  
ATOM   2570  N   GLY A 333     -11.387  38.364  22.774  1.00 12.41      clus N  
ATOM   2571  CA  GLY A 333     -11.011  38.002  21.420  1.00 19.20      clus C  
ATOM   2572  C   GLY A 333     -11.851  36.858  20.906  1.00 20.83      clus C  
ATOM   2573  O   GLY A 333     -12.728  36.378  21.614  1.00 26.55      clus O  
ATOM   2574  N   PHE A 334     -11.552  36.390  19.699  1.00 28.14      clus N  
ATOM   2575  CA  PHE A 334     -12.319  35.313  19.079  1.00 31.83      clus C  
ATOM   2576  C   PHE A 334     -11.514  34.040  18.837  1.00 36.48      clus C  
ATOM   2577  O   PHE A 334     -12.039  32.936  18.953  1.00 49.62      clus O  
ATOM   2578  CB  PHE A 334     -12.944  35.841  17.789  1.00 34.44      clus C  
ATOM   2579  CG  PHE A 334     -13.567  37.212  17.947  1.00 30.52      clus C  
ATOM   2580  CD1 PHE A 334     -13.047  38.308  17.276  1.00 29.11      clus C  
ATOM   2581  CD2 PHE A 334     -14.652  37.411  18.805  1.00 38.29      clus C  
ATOM   2582  CE1 PHE A 334     -13.595  39.582  17.462  1.00 30.33      clus C  
ATOM   2583  CE2 PHE A 334     -15.203  38.686  18.995  1.00 39.46      clus C  
ATOM   2584  CZ  PHE A 334     -14.675  39.767  18.323  1.00 30.31      clus C  
ATOM   2585  N   GLU A 335     -10.244  34.196  18.493  1.00 30.45      clus N  
ATOM   2586  CA  GLU A 335      -9.364  33.054  18.288  1.00 30.56      clus C  
ATOM   2587  C   GLU A 335      -8.303  33.037  19.394  1.00 31.33      clus C  
ATOM   2588  O   GLU A 335      -7.993  34.073  19.986  1.00 34.06      clus O  
ATOM   2589  CB  GLU A 335      -8.701  33.155  16.933  1.00 19.13      clus C  
ATOM   2590  CG  GLU A 335      -9.688  33.197  15.814  1.00 27.49      clus C  
ATOM   2591  CD  GLU A 335      -9.036  33.570  14.506  1.00 32.05      clus C  
ATOM   2592  OE1 GLU A 335      -8.997  34.779  14.202  1.00 38.03      clus O  
ATOM   2593  OE2 GLU A 335      -8.548  32.665  13.792  1.00 26.80      clus O1-
ATOM   2594  N   VAL A 336      -7.774  31.861  19.708  1.00 29.28      clus N  
ATOM   2595  CA  VAL A 336      -6.751  31.765  20.745  1.00 22.60      clus C  
ATOM   2596  C   VAL A 336      -5.351  32.036  20.178  1.00 25.47      clus C  
ATOM   2597  O   VAL A 336      -5.022  31.577  19.076  1.00 29.67      clus O  
ATOM   2598  CB  VAL A 336      -6.742  30.377  21.425  1.00 20.08      clus C  
ATOM   2599  CG1 VAL A 336      -8.154  29.941  21.757  1.00 17.05      clus C  
ATOM   2600  CG2 VAL A 336      -6.028  29.355  20.552  1.00 22.02      clus C  
ATOM   2601  N   PHE A 337      -4.535  32.757  20.951  1.00 21.07      clus N  
ATOM   2602  CA  PHE A 337      -3.159  33.111  20.573  1.00 16.56      clus C  
ATOM   2603  C   PHE A 337      -3.141  34.186  19.501  1.00 11.85      clus C  
ATOM   2604  O   PHE A 337      -2.101  34.458  18.901  1.00 10.62      clus O  
ATOM   2605  CB  PHE A 337      -2.375  31.892  20.057  1.00 18.90      clus C  
ATOM   2606  CG  PHE A 337      -2.282  30.746  21.034  1.00  8.43      clus C  
ATOM   2607  CD1 PHE A 337      -2.451  30.940  22.398  1.00  9.19      clus C  
ATOM   2608  CD2 PHE A 337      -1.998  29.470  20.575  1.00  4.95      clus C  
ATOM   2609  CE1 PHE A 337      -2.338  29.883  23.292  1.00  7.94      clus C  
ATOM   2610  CE2 PHE A 337      -1.884  28.409  21.461  1.00 11.67      clus C  
ATOM   2611  CZ  PHE A 337      -2.055  28.622  22.827  1.00 11.55      clus C  
ATOM   2612  N   ALA A 338      -4.312  34.759  19.242  1.00 12.84      clus N  
ATOM   2613  CA  ALA A 338      -4.473  35.803  18.248  1.00  6.20      clus C  
ATOM   2614  C   ALA A 338      -3.941  37.107  18.801  1.00  6.66      clus C  
ATOM   2615  O   ALA A 338      -3.475  37.962  18.051  1.00 11.58      clus O  
ATOM   2616  CB  ALA A 338      -5.921  35.945  17.906  1.00  3.12      clus C  
ATOM   2617  N   ARG A 339      -3.985  37.218  20.126  1.00 13.26      clus N  
ATOM   2618  CA  ARG A 339      -3.531  38.397  20.864  1.00 15.38      clus C  
ATOM   2619  C   ARG A 339      -4.370  39.633  20.555  1.00 12.27      clus C  
ATOM   2620  O   ARG A 339      -3.852  40.694  20.212  1.00 22.46      clus O  
ATOM   2621  CB  ARG A 339      -2.037  38.655  20.640  1.00  7.39      clus C  
ATOM   2622  CG  ARG A 339      -1.171  37.930  21.638  1.00  4.05      clus C  
ATOM   2623  CD  ARG A 339      -0.401  36.835  20.989  1.00 13.40      clus C  
ATOM   2624  NE  ARG A 339       1.010  37.181  20.903  1.00 12.45      clus N  
ATOM   2625  CZ  ARG A 339       1.914  36.836  21.808  1.00  7.89      clus C  
ATOM   2626  NH1 ARG A 339       1.551  36.134  22.869  1.00  9.18      clus N1+
ATOM   2627  NH2 ARG A 339       3.181  37.192  21.655  1.00 17.08      clus N  
ATOM   2628  N   PHE A 340      -5.669  39.479  20.772  1.00 10.44      clus N  
ATOM   2629  CA  PHE A 340      -6.671  40.494  20.522  1.00 10.16      clus C  
ATOM   2630  C   PHE A 340      -6.357  41.944  20.884  1.00 15.57      clus C  
ATOM   2631  O   PHE A 340      -6.291  42.793  20.000  1.00 20.69      clus O  
ATOM   2632  CB  PHE A 340      -7.990  40.069  21.167  1.00 10.06      clus C  
ATOM   2633  CG  PHE A 340      -9.149  40.963  20.828  1.00  3.42      clus C  
ATOM   2634  CD1 PHE A 340      -9.512  41.178  19.503  1.00  2.00      clus C  
ATOM   2635  CD2 PHE A 340      -9.856  41.615  21.836  1.00  2.42      clus C  
ATOM   2636  CE1 PHE A 340     -10.546  42.025  19.199  1.00  4.86      clus C  
ATOM   2637  CE2 PHE A 340     -10.899  42.469  21.541  1.00  2.00      clus C  
ATOM   2638  CZ  PHE A 340     -11.245  42.678  20.231  1.00  2.00      clus C  
ATOM   2639  N   GLY A 341      -6.182  42.251  22.161  1.00 15.37      clus N  
ATOM   2640  CA  GLY A 341      -5.910  43.641  22.504  1.00 24.00      clus C  
ATOM   2641  C   GLY A 341      -4.542  44.225  22.154  1.00 21.86      clus C  
ATOM   2642  O   GLY A 341      -4.187  45.293  22.655  1.00 27.32      clus O  
ATOM   2643  N   SER A 342      -3.797  43.569  21.270  1.00 18.44      clus N  
ATOM   2644  CA  SER A 342      -2.459  44.016  20.908  1.00 17.99      clus C  
ATOM   2645  C   SER A 342      -2.284  45.476  20.531  1.00 14.44      clus C  
ATOM   2646  O   SER A 342      -1.347  46.130  20.991  1.00 14.66      clus O  
ATOM   2647  CB  SER A 342      -1.858  43.117  19.828  1.00 26.16      clus C  
ATOM   2648  OG  SER A 342      -1.182  42.012  20.408  1.00 35.36      clus O  
ATOM   2649  N   ALA A 343      -3.176  45.990  19.696  1.00 11.94      clus N  
ATOM   2650  CA  ALA A 343      -3.087  47.379  19.265  1.00  9.28      clus C  
ATOM   2651  C   ALA A 343      -4.477  47.991  19.113  1.00 10.92      clus C  
ATOM   2652  O   ALA A 343      -5.273  47.543  18.286  1.00 18.65      clus O  
ATOM   2653  CB  ALA A 343      -2.324  47.460  17.951  1.00  2.00      clus C  
ATOM   2654  N   ILE A 344      -4.775  49.008  19.912  1.00  4.85      clus N  
ATOM   2655  CA  ILE A 344      -6.071  49.665  19.849  1.00  7.39      clus C  
ATOM   2656  C   ILE A 344      -5.922  51.007  19.157  1.00 11.79      clus C  
ATOM   2657  O   ILE A 344      -5.604  51.997  19.806  1.00 19.18      clus O  
ATOM   2658  CB  ILE A 344      -6.605  49.950  21.242  1.00  5.41      clus C  
ATOM   2659  CG1 ILE A 344      -6.463  48.720  22.123  1.00  8.04      clus C  
ATOM   2660  CG2 ILE A 344      -8.050  50.355  21.162  1.00  4.17      clus C  
ATOM   2661  CD1 ILE A 344      -6.869  48.979  23.564  1.00 11.63      clus C  
ATOM   2662  N   ALA A 345      -6.200  51.066  17.861  1.00 14.43      clus N  
ATOM   2663  CA  ALA A 345      -6.054  52.326  17.145  1.00  4.22      clus C  
ATOM   2664  C   ALA A 345      -7.341  53.067  16.789  1.00  4.70      clus C  
ATOM   2665  O   ALA A 345      -8.175  52.569  16.035  1.00  2.00      clus O  
ATOM   2666  CB  ALA A 345      -5.225  52.110  15.903  1.00  2.00      clus C  
ATOM   2667  N   PRO A 346      -7.532  54.263  17.364  1.00 11.18      clus N  
ATOM   2668  CA  PRO A 346      -8.692  55.144  17.140  1.00 12.06      clus C  
ATOM   2669  C   PRO A 346      -8.727  55.600  15.682  1.00 13.55      clus C  
ATOM   2670  O   PRO A 346      -7.682  55.807  15.085  1.00 14.47      clus O  
ATOM   2671  CB  PRO A 346      -8.374  56.341  18.023  1.00  2.00      clus C  
ATOM   2672  CG  PRO A 346      -7.654  55.719  19.163  1.00  6.29      clus C  
ATOM   2673  CD  PRO A 346      -6.740  54.717  18.514  1.00  5.24      clus C  
ATOM   2674  N   LEU A 347      -9.922  55.707  15.108  1.00 14.07      clus N  
ATOM   2675  CA  LEU A 347     -10.110  56.168  13.721  1.00 13.32      clus C  
ATOM   2676  C   LEU A 347     -10.877  57.449  13.855  1.00 13.02      clus C  
ATOM   2677  O   LEU A 347     -11.176  57.879  14.958  1.00 17.18      clus O  
ATOM   2678  CB  LEU A 347     -11.005  55.213  12.956  1.00 10.31      clus C  
ATOM   2679  CG  LEU A 347     -10.651  53.805  13.345  1.00  8.49      clus C  
ATOM   2680  CD1 LEU A 347     -11.669  52.812  12.842  1.00  2.00      clus C  
ATOM   2681  CD2 LEU A 347      -9.258  53.588  12.798  1.00  6.75      clus C  
ATOM   2682  N   GLY A 348     -11.256  58.048  12.748  1.00 10.29      clus N  
ATOM   2683  CA  GLY A 348     -12.022  59.260  12.906  1.00 26.65      clus C  
ATOM   2684  C   GLY A 348     -13.426  58.910  13.368  1.00 33.17      clus C  
ATOM   2685  O   GLY A 348     -13.685  58.541  14.513  1.00 26.76      clus O  
ATOM   2686  N   ASP A 349     -14.330  59.026  12.412  1.00 36.76      clus N  
ATOM   2687  CA  ASP A 349     -15.750  58.752  12.543  1.00 35.77      clus C  
ATOM   2688  C   ASP A 349     -15.851  58.102  11.173  1.00 38.24      clus C  
ATOM   2689  O   ASP A 349     -16.298  58.722  10.212  1.00 44.82      clus O  
ATOM   2690  CB  ASP A 349     -16.503  60.093  12.569  1.00 36.07      clus C  
ATOM   2691  CG  ASP A 349     -17.983  59.952  12.849  1.00 42.51      clus C  
ATOM   2692  OD1 ASP A 349     -18.610  58.968  12.401  1.00 48.82      clus O  
ATOM   2693  OD2 ASP A 349     -18.522  60.857  13.516  1.00 40.90      clus O1-
ATOM   2694  N   LEU A 350     -15.290  56.899  11.085  1.00 33.20      clus N  
ATOM   2695  CA  LEU A 350     -15.216  56.115   9.856  1.00 40.52      clus C  
ATOM   2696  C   LEU A 350     -16.451  56.042   8.930  1.00 41.10      clus C  
ATOM   2697  O   LEU A 350     -16.378  55.475   7.829  1.00 46.26      clus O  
ATOM   2698  CB  LEU A 350     -14.690  54.713  10.184  1.00 46.72      clus C  
ATOM   2699  CG  LEU A 350     -13.755  54.087   9.151  1.00 44.58      clus C  
ATOM   2700  CD1 LEU A 350     -12.542  54.974   8.952  1.00 50.76      clus C  
ATOM   2701  CD2 LEU A 350     -13.336  52.721   9.622  1.00 44.72      clus C  
ATOM   2702  N   ASP A 351     -17.580  56.597   9.361  1.00 38.24      clus N  
ATOM   2703  CA  ASP A 351     -18.782  56.604   8.534  1.00 38.50      clus C  
ATOM   2704  C   ASP A 351     -19.517  57.934   8.683  1.00 37.31      clus C  
ATOM   2705  O   ASP A 351     -20.605  58.133   8.147  1.00 41.78      clus O  
ATOM   2706  CB  ASP A 351     -19.687  55.413   8.870  1.00 42.15      clus C  
ATOM   2707  CG  ASP A 351     -20.173  55.418  10.309  1.00 41.56      clus C  
ATOM   2708  OD1 ASP A 351     -21.291  54.900  10.544  1.00 47.44      clus O  
ATOM   2709  OD2 ASP A 351     -19.449  55.923  11.199  1.00 33.47      clus O1-
ATOM   2710  N   GLN A 352     -18.880  58.853   9.398  1.00 35.36      clus N  
ATOM   2711  CA  GLN A 352     -19.411  60.180   9.630  1.00 36.36      clus C  
ATOM   2712  C   GLN A 352     -20.846  60.145  10.123  1.00 34.10      clus C  
ATOM   2713  O   GLN A 352     -21.680  60.935   9.676  1.00 38.54      clus O  
ATOM   2714  CB  GLN A 352     -19.284  61.023   8.359  1.00 44.93      clus C  
ATOM   2715  CG  GLN A 352     -17.836  61.357   7.969  1.00 53.44      clus C  
ATOM   2716  CD  GLN A 352     -17.221  62.491   8.777  1.00 58.04      clus C  
ATOM   2717  NE2 GLN A 352     -16.878  63.582   8.096  1.00 56.73      clus N  
ATOM   2718  OE1 GLN A 352     -17.052  62.387   9.994  1.00 63.81      clus O  
ATOM   2719  N   ASP A 353     -21.135  59.203  11.022  1.00 32.72      clus N  
ATOM   2720  CA  ASP A 353     -22.475  59.079  11.585  1.00 34.51      clus C  
ATOM   2721  C   ASP A 353     -22.626  59.978  12.798  1.00 35.22      clus C  
ATOM   2722  O   ASP A 353     -23.678  60.004  13.432  1.00 43.10      clus O  
ATOM   2723  CB  ASP A 353     -22.841  57.612  11.914  1.00 33.96      clus C  
ATOM   2724  CG  ASP A 353     -22.127  57.053  13.152  1.00 38.29      clus C  
ATOM   2725  OD1 ASP A 353     -21.730  55.875  13.104  1.00 35.58      clus O  
ATOM   2726  OD2 ASP A 353     -22.019  57.728  14.194  1.00 39.61      clus O1-
ATOM   2727  N   GLY A 354     -21.544  60.670  13.148  1.00 34.28      clus N  
ATOM   2728  CA  GLY A 354     -21.569  61.569  14.291  1.00 37.13      clus C  
ATOM   2729  C   GLY A 354     -20.993  60.998  15.574  1.00 32.33      clus C  
ATOM   2730  O   GLY A 354     -21.096  61.617  16.640  1.00 33.88      clus O  
ATOM   2731  N   PHE A 355     -20.393  59.817  15.477  1.00 26.35      clus N  
ATOM   2732  CA  PHE A 355     -19.796  59.165  16.633  1.00 24.74      clus C  
ATOM   2733  C   PHE A 355     -18.425  58.627  16.276  1.00 26.40      clus C  
ATOM   2734  O   PHE A 355     -18.139  58.393  15.106  1.00 30.02      clus O  
ATOM   2735  CB  PHE A 355     -20.712  58.053  17.125  1.00 17.52      clus C  
ATOM   2736  CG  PHE A 355     -21.949  58.560  17.796  1.00  9.17      clus C  
ATOM   2737  CD1 PHE A 355     -21.890  59.058  19.098  1.00  3.69      clus C  
ATOM   2738  CD2 PHE A 355     -23.161  58.573  17.126  1.00  3.29      clus C  
ATOM   2739  CE1 PHE A 355     -23.013  59.565  19.727  1.00  2.00      clus C  
ATOM   2740  CE2 PHE A 355     -24.300  59.080  17.746  1.00 12.70      clus C  
ATOM   2741  CZ  PHE A 355     -24.224  59.580  19.056  1.00 12.33      clus C  
ATOM   2742  N   ASN A 356     -17.559  58.452  17.266  1.00 29.49      clus N  
ATOM   2743  CA  ASN A 356     -16.224  57.955  16.954  1.00 34.84      clus C  
ATOM   2744  C   ASN A 356     -16.049  56.450  16.820  1.00 34.07      clus C  
ATOM   2745  O   ASN A 356     -16.870  55.663  17.285  1.00 34.59      clus O  
ATOM   2746  CB  ASN A 356     -15.190  58.550  17.897  1.00 29.42      clus C  
ATOM   2747  CG  ASN A 356     -14.877  59.980  17.554  1.00 26.73      clus C  
ATOM   2748  ND2 ASN A 356     -14.948  60.859  18.546  1.00 32.73      clus N  
ATOM   2749  OD1 ASN A 356     -14.611  60.302  16.392  1.00 22.67      clus O  
ATOM   2750  N   ASP A 357     -14.972  56.064  16.150  1.00 34.11      clus N  
ATOM   2751  CA  ASP A 357     -14.680  54.663  15.925  1.00 32.65      clus C  
ATOM   2752  C   ASP A 357     -13.306  54.270  16.428  1.00 30.17      clus C  
ATOM   2753  O   ASP A 357     -12.562  55.099  16.951  1.00 32.38      clus O  
ATOM   2754  CB  ASP A 357     -14.851  54.332  14.441  1.00 40.43      clus C  
ATOM   2755  CG  ASP A 357     -16.256  54.643  13.935  1.00 45.02      clus C  
ATOM   2756  OD1 ASP A 357     -16.384  55.271  12.866  1.00 47.20      clus O  
ATOM   2757  OD2 ASP A 357     -17.238  54.279  14.618  1.00 39.02      clus O1-
ATOM   2758  N   ILE A 358     -12.980  52.994  16.275  1.00 23.87      clus N  
ATOM   2759  CA  ILE A 358     -11.711  52.471  16.744  1.00 15.45      clus C  
ATOM   2760  C   ILE A 358     -11.505  51.075  16.172  1.00  7.99      clus C  
ATOM   2761  O   ILE A 358     -12.443  50.438  15.727  1.00  2.00      clus O  
ATOM   2762  CB  ILE A 358     -11.709  52.442  18.279  1.00  7.04      clus C  
ATOM   2763  CG1 ILE A 358     -10.307  52.207  18.827  1.00  3.88      clus C  
ATOM   2764  CG2 ILE A 358     -12.687  51.419  18.774  1.00  2.00      clus C  
ATOM   2765  CD1 ILE A 358     -10.149  52.706  20.260  1.00  2.00      clus C  
ATOM   2766  N   ALA A 359     -10.266  50.621  16.138  1.00  9.89      clus N  
ATOM   2767  CA  ALA A 359      -9.979  49.308  15.609  1.00  2.00      clus C  
ATOM   2768  C   ALA A 359      -8.989  48.610  16.503  1.00  5.18      clus C  
ATOM   2769  O   ALA A 359      -7.944  49.165  16.845  1.00  2.00      clus O  
ATOM   2770  CB  ALA A 359      -9.438  49.415  14.223  1.00  2.00      clus C  
ATOM   2771  N   ILE A 360      -9.361  47.410  16.932  1.00  7.18      clus N  
ATOM   2772  CA  ILE A 360      -8.523  46.579  17.790  1.00  5.05      clus C  
ATOM   2773  C   ILE A 360      -7.901  45.539  16.905  1.00  2.95      clus C  
ATOM   2774  O   ILE A 360      -8.501  45.132  15.917  1.00  9.89      clus O  
ATOM   2775  CB  ILE A 360      -9.340  45.913  18.873  1.00  2.00      clus C  
ATOM   2776  CG1 ILE A 360     -10.072  47.005  19.666  1.00  2.00      clus C  
ATOM   2777  CG2 ILE A 360      -8.436  45.063  19.741  1.00  2.00      clus C  
ATOM   2778  CD1 ILE A 360     -10.758  46.548  20.911  1.00  5.99      clus C  
ATOM   2779  N   ALA A 361      -6.683  45.131  17.198  1.00  2.00      clus N  
ATOM   2780  CA  ALA A 361      -6.100  44.166  16.311  1.00  6.24      clus C  
ATOM   2781  C   ALA A 361      -5.524  42.970  16.983  1.00 14.19      clus C  
ATOM   2782  O   ALA A 361      -4.893  43.065  18.030  1.00 20.05      clus O  
ATOM   2783  CB  ALA A 361      -5.072  44.811  15.442  1.00  7.55      clus C  
ATOM   2784  N   ALA A 362      -5.800  41.827  16.377  1.00 14.07      clus N  
ATOM   2785  CA  ALA A 362      -5.287  40.551  16.825  1.00  7.79      clus C  
ATOM   2786  C   ALA A 362      -4.387  40.226  15.639  1.00  4.98      clus C  
ATOM   2787  O   ALA A 362      -4.824  39.631  14.661  1.00  2.00      clus O  
ATOM   2788  CB  ALA A 362      -6.403  39.566  16.939  1.00 19.74      clus C  
ATOM   2789  N   PRO A 363      -3.131  40.703  15.690  1.00  5.78      clus N  
ATOM   2790  CA  PRO A 363      -2.077  40.553  14.685  1.00  2.00      clus C  
ATOM   2791  C   PRO A 363      -1.672  39.142  14.369  1.00  4.59      clus C  
ATOM   2792  O   PRO A 363      -1.143  38.877  13.291  1.00  6.76      clus O  
ATOM   2793  CB  PRO A 363      -0.923  41.312  15.305  1.00  4.10      clus C  
ATOM   2794  CG  PRO A 363      -1.134  41.071  16.766  1.00  4.61      clus C  
ATOM   2795  CD  PRO A 363      -2.584  41.309  16.917  1.00  2.00      clus C  
ATOM   2796  N   TYR A 364      -1.885  38.242  15.320  1.00  6.88      clus N  
ATOM   2797  CA  TYR A 364      -1.523  36.853  15.118  1.00 10.94      clus C  
ATOM   2798  C   TYR A 364      -2.757  36.025  14.942  1.00 15.27      clus C  
ATOM   2799  O   TYR A 364      -2.740  34.820  15.168  1.00 23.32      clus O  
ATOM   2800  CB  TYR A 364      -0.718  36.328  16.289  1.00  9.98      clus C  
ATOM   2801  CG  TYR A 364       0.452  37.201  16.623  1.00 16.90      clus C  
ATOM   2802  CD1 TYR A 364       0.480  37.931  17.815  1.00 18.69      clus C  
ATOM   2803  CD2 TYR A 364       1.516  37.332  15.742  1.00 12.60      clus C  
ATOM   2804  CE1 TYR A 364       1.538  38.773  18.121  1.00 30.19      clus C  
ATOM   2805  CE2 TYR A 364       2.579  38.174  16.040  1.00 31.21      clus C  
ATOM   2806  CZ  TYR A 364       2.584  38.890  17.231  1.00 32.39      clus C  
ATOM   2807  OH  TYR A 364       3.639  39.716  17.534  1.00 37.01      clus O  
ATOM   2808  N   GLY A 365      -3.837  36.687  14.551  1.00 20.81      clus N  
ATOM   2809  CA  GLY A 365      -5.094  35.998  14.334  1.00 22.93      clus C  
ATOM   2810  C   GLY A 365      -5.224  35.472  12.918  1.00 24.35      clus C  
ATOM   2811  O   GLY A 365      -4.233  35.392  12.193  1.00 24.53      clus O  
ATOM   2812  N   GLY A 366      -6.447  35.088  12.553  1.00 26.98      clus N  
ATOM   2813  CA  GLY A 366      -6.740  34.572  11.226  1.00 33.99      clus C  
ATOM   2814  C   GLY A 366      -6.159  33.221  10.848  1.00 41.32      clus C  
ATOM   2815  O   GLY A 366      -5.556  32.520  11.669  1.00 42.85      clus O  
ATOM   2816  N   GLU A 367      -6.410  32.828   9.603  1.00 47.54      clus N  
ATOM   2817  CA  GLU A 367      -5.899  31.576   9.063  1.00 58.02      clus C  
ATOM   2818  C   GLU A 367      -4.462  31.912   8.706  1.00 60.29      clus C  
ATOM   2819  O   GLU A 367      -4.199  32.985   8.163  1.00 61.24      clus O  
ATOM   2820  CB  GLU A 367      -6.684  31.164   7.805  1.00 64.63      clus C  
ATOM   2821  CG  GLU A 367      -6.342  31.929   6.495  1.00 71.58      clus C  
ATOM   2822  CD  GLU A 367      -6.827  33.390   6.445  1.00 75.38      clus C  
ATOM   2823  OE1 GLU A 367      -6.497  34.089   5.461  1.00 73.99      clus O  
ATOM   2824  OE2 GLU A 367      -7.540  33.843   7.367  1.00 78.01      clus O1-
ATOM   2825  N   ASP A 368      -3.533  31.029   9.057  1.00 60.93      clus N  
ATOM   2826  CA  ASP A 368      -2.104  31.248   8.790  1.00 64.07      clus C  
ATOM   2827  C   ASP A 368      -1.535  32.450   9.571  1.00 61.61      clus C  
ATOM   2828  O   ASP A 368      -0.588  33.098   9.114  1.00 63.69      clus O  
ATOM   2829  CB  ASP A 368      -1.846  31.455   7.287  1.00 69.66      clus C  
ATOM   2830  CG  ASP A 368      -2.267  30.269   6.442  1.00 75.90      clus C  
ATOM   2831  OD1 ASP A 368      -1.407  29.741   5.704  1.00 81.17      clus O  
ATOM   2832  OD2 ASP A 368      -3.457  29.883   6.493  1.00 78.65      clus O1-
ATOM   2833  N   LYS A 369      -2.113  32.735  10.739  1.00 55.77      clus N  
ATOM   2834  CA  LYS A 369      -1.689  33.849  11.578  1.00 53.10      clus C  
ATOM   2835  C   LYS A 369      -1.291  35.084  10.777  1.00 48.91      clus C  
ATOM   2836  O   LYS A 369      -0.309  35.765  11.099  1.00 54.01      clus O  
ATOM   2837  CB  LYS A 369      -0.558  33.435  12.523  1.00 60.79      clus C  
ATOM   2838  CG  LYS A 369      -1.019  32.720  13.788  1.00 68.54      clus C  
ATOM   2839  CD  LYS A 369       0.044  32.782  14.896  1.00 73.25      clus C  
ATOM   2840  CE  LYS A 369      -0.455  32.162  16.200  1.00 77.03      clus C  
ATOM   2841  NZ  LYS A 369       0.522  32.303  17.319  1.00 74.23      clus N1+
ATOM   2842  N   LYS A 370      -2.033  35.337   9.700  1.00 41.00      clus N  
ATOM   2843  CA  LYS A 370      -1.807  36.496   8.834  1.00 35.48      clus C  
ATOM   2844  C   LYS A 370      -2.192  37.806   9.543  1.00 32.96      clus C  
ATOM   2845  O   LYS A 370      -1.746  38.878   9.132  1.00 33.46      clus O  
ATOM   2846  CB  LYS A 370      -2.620  36.368   7.545  1.00 35.38      clus C  
ATOM   2847  CG  LYS A 370      -2.209  35.239   6.625  1.00 36.44      clus C  
ATOM   2848  CD  LYS A 370      -3.131  35.193   5.410  1.00 42.01      clus C  
ATOM   2849  CE  LYS A 370      -2.716  34.105   4.430  1.00 51.88      clus C  
ATOM   2850  NZ  LYS A 370      -3.698  33.946   3.318  1.00 56.88      clus N1+
ATOM   2851  N   GLY A 371      -3.045  37.695  10.572  1.00 25.72      clus N  
ATOM   2852  CA  GLY A 371      -3.499  38.835  11.360  1.00 12.56      clus C  
ATOM   2853  C   GLY A 371      -4.823  39.441  10.938  1.00  3.83      clus C  
ATOM   2854  O   GLY A 371      -5.091  39.547   9.737  1.00  4.23      clus O  
ATOM   2855  N   ILE A 372      -5.626  39.877  11.913  1.00  2.00      clus N  
ATOM   2856  CA  ILE A 372      -6.942  40.489  11.644  1.00 10.91      clus C  
ATOM   2857  C   ILE A 372      -7.166  41.824  12.368  1.00 14.65      clus C  
ATOM   2858  O   ILE A 372      -6.834  41.977  13.551  1.00 19.40      clus O  
ATOM   2859  CB  ILE A 372      -8.138  39.546  12.059  1.00  2.61      clus C  
ATOM   2860  CG1 ILE A 372      -8.075  38.201  11.327  1.00  8.87      clus C  
ATOM   2861  CG2 ILE A 372      -9.475  40.189  11.757  1.00  2.00      clus C  
ATOM   2862  CD1 ILE A 372      -8.312  38.269   9.830  1.00 15.49      clus C  
ATOM   2863  N   VAL A 373      -7.738  42.786  11.653  1.00 11.69      clus N  
ATOM   2864  CA  VAL A 373      -8.051  44.074  12.247  1.00  8.79      clus C  
ATOM   2865  C   VAL A 373      -9.570  44.171  12.345  1.00  8.28      clus C  
ATOM   2866  O   VAL A 373     -10.284  44.068  11.341  1.00  2.00      clus O  
ATOM   2867  CB  VAL A 373      -7.551  45.233  11.399  1.00 18.45      clus C  
ATOM   2868  CG1 VAL A 373      -7.877  46.550  12.088  1.00 28.36      clus C  
ATOM   2869  CG2 VAL A 373      -6.058  45.101  11.160  1.00 28.94      clus C  
ATOM   2870  N   TYR A 374     -10.067  44.326  13.564  1.00  4.25      clus N  
ATOM   2871  CA  TYR A 374     -11.500  44.427  13.784  1.00  6.22      clus C  
ATOM   2872  C   TYR A 374     -11.844  45.886  14.012  1.00  7.86      clus C  
ATOM   2873  O   TYR A 374     -11.232  46.542  14.859  1.00  4.93      clus O  
ATOM   2874  CB  TYR A 374     -11.910  43.624  15.020  1.00  9.29      clus C  
ATOM   2875  CG  TYR A 374     -11.518  42.167  14.984  1.00 17.17      clus C  
ATOM   2876  CD1 TYR A 374     -12.343  41.212  14.389  1.00 16.87      clus C  
ATOM   2877  CD2 TYR A 374     -10.338  41.734  15.579  1.00 18.10      clus C  
ATOM   2878  CE1 TYR A 374     -12.001  39.855  14.393  1.00 23.60      clus C  
ATOM   2879  CE2 TYR A 374      -9.986  40.387  15.588  1.00 31.11      clus C  
ATOM   2880  CZ  TYR A 374     -10.820  39.450  14.999  1.00 29.22      clus C  
ATOM   2881  OH  TYR A 374     -10.478  38.111  15.060  1.00 32.53      clus O  
ATOM   2882  N   ILE A 375     -12.793  46.406  13.240  1.00  8.73      clus N  
ATOM   2883  CA  ILE A 375     -13.208  47.796  13.399  1.00  8.91      clus C  
ATOM   2884  C   ILE A 375     -14.572  47.816  14.078  1.00  6.91      clus C  
ATOM   2885  O   ILE A 375     -15.488  47.109  13.664  1.00 14.49      clus O  
ATOM   2886  CB  ILE A 375     -13.267  48.538  12.046  1.00  4.39      clus C  
ATOM   2887  CG1 ILE A 375     -14.451  48.040  11.226  1.00 16.66      clus C  
ATOM   2888  CG2 ILE A 375     -11.981  48.289  11.257  1.00  2.00      clus C  
ATOM   2889  CD1 ILE A 375     -14.908  48.990  10.157  1.00 30.69      clus C  
ATOM   2890  N   PHE A 376     -14.669  48.557  15.173  1.00  8.89      clus N  
ATOM   2891  CA  PHE A 376     -15.912  48.672  15.931  1.00 18.63      clus C  
ATOM   2892  C   PHE A 376     -16.480  50.076  15.749  1.00 25.77      clus C  
ATOM   2893  O   PHE A 376     -15.759  50.976  15.320  1.00 34.46      clus O  
ATOM   2894  CB  PHE A 376     -15.639  48.406  17.408  1.00 21.19      clus C  
ATOM   2895  CG  PHE A 376     -15.129  47.023  17.690  1.00 28.24      clus C  
ATOM   2896  CD1 PHE A 376     -13.885  46.618  17.236  1.00 24.11      clus C  
ATOM   2897  CD2 PHE A 376     -15.894  46.124  18.425  1.00 33.52      clus C  
ATOM   2898  CE1 PHE A 376     -13.407  45.345  17.509  1.00 20.52      clus C  
ATOM   2899  CE2 PHE A 376     -15.420  44.846  18.701  1.00 26.95      clus C  
ATOM   2900  CZ  PHE A 376     -14.174  44.462  18.242  1.00 22.69      clus C  
ATOM   2901  N   ASN A 377     -17.762  50.271  16.055  1.00 29.26      clus N  
ATOM   2902  CA  ASN A 377     -18.380  51.592  15.895  1.00 24.92      clus C  
ATOM   2903  C   ASN A 377     -18.846  52.226  17.200  1.00 23.50      clus C  
ATOM   2904  O   ASN A 377     -19.078  51.546  18.194  1.00 23.56      clus O  
ATOM   2905  CB  ASN A 377     -19.552  51.532  14.903  1.00 24.86      clus C  
ATOM   2906  CG  ASN A 377     -19.099  51.384  13.449  1.00 30.00      clus C  
ATOM   2907  ND2 ASN A 377     -18.532  50.238  13.119  1.00 34.91      clus N  
ATOM   2908  OD1 ASN A 377     -19.277  52.287  12.635  1.00 28.97      clus O  
ATOM   2909  N   GLY A 378     -18.959  53.545  17.196  1.00 25.90      clus N  
ATOM   2910  CA  GLY A 378     -19.420  54.242  18.380  1.00 28.49      clus C  
ATOM   2911  C   GLY A 378     -20.891  54.606  18.266  1.00 34.78      clus C  
ATOM   2912  O   GLY A 378     -21.422  54.771  17.157  1.00 38.54      clus O  
ATOM   2913  N   ARG A 379     -21.562  54.688  19.411  1.00 36.14      clus N  
ATOM   2914  CA  ARG A 379     -22.975  55.049  19.460  1.00 37.90      clus C  
ATOM   2915  C   ARG A 379     -23.243  55.827  20.733  1.00 31.89      clus C  
ATOM   2916  O   ARG A 379     -22.348  55.981  21.563  1.00 31.91      clus O  
ATOM   2917  CB  ARG A 379     -23.868  53.816  19.367  1.00 41.81      clus C  
ATOM   2918  CG  ARG A 379     -23.603  52.736  20.400  1.00 55.45      clus C  
ATOM   2919  CD  ARG A 379     -24.261  51.429  19.979  1.00 68.32      clus C  
ATOM   2920  NE  ARG A 379     -23.834  51.041  18.636  1.00 78.93      clus N  
ATOM   2921  CZ  ARG A 379     -24.577  51.160  17.536  1.00 82.82      clus C  
ATOM   2922  NH1 ARG A 379     -25.812  51.650  17.604  1.00 87.47      clus N1+
ATOM   2923  NH2 ARG A 379     -24.057  50.849  16.356  1.00 81.19      clus N  
ATOM   2924  N   SER A 380     -24.456  56.349  20.867  1.00 28.15      clus N  
ATOM   2925  CA  SER A 380     -24.840  57.145  22.031  1.00 31.52      clus C  
ATOM   2926  C   SER A 380     -24.557  56.444  23.350  1.00 35.93      clus C  
ATOM   2927  O   SER A 380     -23.937  57.003  24.256  1.00 40.77      clus O  
ATOM   2928  CB  SER A 380     -26.326  57.474  21.961  1.00 32.66      clus C  
ATOM   2929  OG  SER A 380     -27.104  56.288  21.902  1.00 43.42      clus O  
ATOM   2930  N   THR A 381     -25.009  55.200  23.422  1.00 42.62      clus N  
ATOM   2931  CA  THR A 381     -24.875  54.340  24.592  1.00 40.62      clus C  
ATOM   2932  C   THR A 381     -23.449  53.921  24.965  1.00 32.88      clus C  
ATOM   2933  O   THR A 381     -23.194  53.525  26.102  1.00 29.99      clus O  
ATOM   2934  CB  THR A 381     -25.717  53.062  24.387  1.00 43.13      clus C  
ATOM   2935  CG2 THR A 381     -27.210  53.404  24.369  1.00 35.20      clus C  
ATOM   2936  OG1 THR A 381     -25.352  52.445  23.140  1.00 42.24      clus O  
ATOM   2937  N   GLY A 382     -22.542  53.979  23.998  1.00 28.69      clus N  
ATOM   2938  CA  GLY A 382     -21.163  53.587  24.227  1.00 24.99      clus C  
ATOM   2939  C   GLY A 382     -20.597  52.956  22.970  1.00 23.97      clus C  
ATOM   2940  O   GLY A 382     -20.877  53.414  21.860  1.00 30.24      clus O  
ATOM   2941  N   LEU A 383     -19.812  51.897  23.124  1.00 17.50      clus N  
ATOM   2942  CA  LEU A 383     -19.234  51.225  21.963  1.00 14.89      clus C  
ATOM   2943  C   LEU A 383     -19.977  49.926  21.598  1.00 17.18      clus C  
ATOM   2944  O   LEU A 383     -20.200  49.065  22.461  1.00 18.07      clus O  
ATOM   2945  CB  LEU A 383     -17.751  50.931  22.229  1.00 10.07      clus C  
ATOM   2946  CG  LEU A 383     -17.040  50.015  21.223  1.00  6.88      clus C  
ATOM   2947  CD1 LEU A 383     -16.668  50.762  19.958  1.00  6.10      clus C  
ATOM   2948  CD2 LEU A 383     -15.809  49.455  21.856  1.00  3.52      clus C  
ATOM   2949  N   ASN A 384     -20.363  49.786  20.330  1.00 17.03      clus N  
ATOM   2950  CA  ASN A 384     -21.041  48.569  19.872  1.00 19.06      clus C  
ATOM   2951  C   ASN A 384     -20.029  47.426  19.757  1.00 21.91      clus C  
ATOM   2952  O   ASN A 384     -19.206  47.400  18.830  1.00 18.35      clus O  
ATOM   2953  CB  ASN A 384     -21.732  48.787  18.525  1.00 24.61      clus C  
ATOM   2954  CG  ASN A 384     -22.231  47.491  17.907  1.00 34.32      clus C  
ATOM   2955  ND2 ASN A 384     -22.817  46.624  18.732  1.00 39.74      clus N  
ATOM   2956  OD1 ASN A 384     -22.073  47.261  16.703  1.00 44.02      clus O  
ATOM   2957  N   ALA A 385     -20.174  46.452  20.659  1.00 17.09      clus N  
ATOM   2958  CA  ALA A 385     -19.296  45.281  20.782  1.00 11.53      clus C  
ATOM   2959  C   ALA A 385     -19.062  44.328  19.607  1.00 10.93      clus C  
ATOM   2960  O   ALA A 385     -18.219  43.428  19.697  1.00 14.48      clus O  
ATOM   2961  CB  ALA A 385     -19.718  44.495  21.976  1.00  2.50      clus C  
ATOM   2962  N   VAL A 386     -19.793  44.511  18.517  1.00  8.58      clus N  
ATOM   2963  CA  VAL A 386     -19.633  43.638  17.370  1.00 12.13      clus C  
ATOM   2964  C   VAL A 386     -18.803  44.216  16.233  1.00 17.37      clus C  
ATOM   2965  O   VAL A 386     -19.142  45.254  15.659  1.00 23.55      clus O  
ATOM   2966  CB  VAL A 386     -20.982  43.236  16.808  1.00 10.76      clus C  
ATOM   2967  CG1 VAL A 386     -20.812  42.134  15.772  1.00 12.76      clus C  
ATOM   2968  CG2 VAL A 386     -21.880  42.810  17.935  1.00  9.28      clus C  
ATOM   2969  N   PRO A 387     -17.715  43.530  15.876  1.00 14.16      clus N  
ATOM   2970  CA  PRO A 387     -16.825  43.955  14.797  1.00 14.38      clus C  
ATOM   2971  C   PRO A 387     -17.617  44.267  13.533  1.00 15.26      clus C  
ATOM   2972  O   PRO A 387     -18.184  43.364  12.919  1.00 27.06      clus O  
ATOM   2973  CB  PRO A 387     -15.939  42.730  14.604  1.00  7.79      clus C  
ATOM   2974  CG  PRO A 387     -15.790  42.236  15.997  1.00 11.57      clus C  
ATOM   2975  CD  PRO A 387     -17.191  42.328  16.548  1.00 12.71      clus C  
ATOM   2976  N   SER A 388     -17.685  45.546  13.172  1.00  9.80      clus N  
ATOM   2977  CA  SER A 388     -18.415  45.978  11.983  1.00  4.12      clus C  
ATOM   2978  C   SER A 388     -17.742  45.622  10.694  1.00  2.47      clus C  
ATOM   2979  O   SER A 388     -18.332  45.758   9.635  1.00  2.00      clus O  
ATOM   2980  CB  SER A 388     -18.629  47.473  11.986  1.00  4.00      clus C  
ATOM   2981  OG  SER A 388     -19.651  47.810  12.901  1.00 27.28      clus O  
ATOM   2982  N   GLN A 389     -16.489  45.208  10.775  1.00  4.83      clus N  
ATOM   2983  CA  GLN A 389     -15.745  44.827   9.582  1.00 10.04      clus C  
ATOM   2984  C   GLN A 389     -14.461  44.247  10.120  1.00 11.50      clus C  
ATOM   2985  O   GLN A 389     -14.101  44.506  11.275  1.00 12.84      clus O  
ATOM   2986  CB  GLN A 389     -15.463  46.060   8.699  1.00  9.51      clus C  
ATOM   2987  CG  GLN A 389     -14.717  45.808   7.365  1.00 16.44      clus C  
ATOM   2988  CD  GLN A 389     -14.581  47.082   6.504  1.00 17.90      clus C  
ATOM   2989  NE2 GLN A 389     -13.652  47.072   5.540  1.00  5.85      clus N  
ATOM   2990  OE1 GLN A 389     -15.305  48.053   6.712  1.00 16.90      clus O  
ATOM   2991  N   ILE A 390     -13.821  43.403   9.320  1.00  5.15      clus N  
ATOM   2992  CA  ILE A 390     -12.566  42.795   9.733  1.00 15.42      clus C  
ATOM   2993  C   ILE A 390     -11.536  42.839   8.603  1.00 22.30      clus C  
ATOM   2994  O   ILE A 390     -11.740  42.254   7.530  1.00 26.80      clus O  
ATOM   2995  CB  ILE A 390     -12.738  41.312  10.224  1.00 11.27      clus C  
ATOM   2996  CG1 ILE A 390     -13.087  40.376   9.065  1.00 15.83      clus C  
ATOM   2997  CG2 ILE A 390     -13.798  41.223  11.303  1.00 10.78      clus C  
ATOM   2998  CD1 ILE A 390     -12.250  39.130   9.029  1.00 17.99      clus C  
ATOM   2999  N   LEU A 391     -10.445  43.568   8.817  1.00 17.31      clus N  
ATOM   3000  CA  LEU A 391      -9.414  43.625   7.793  1.00 15.44      clus C  
ATOM   3001  C   LEU A 391      -8.594  42.353   8.000  1.00 13.66      clus C  
ATOM   3002  O   LEU A 391      -8.415  41.920   9.141  1.00  3.41      clus O  
ATOM   3003  CB  LEU A 391      -8.582  44.912   7.925  1.00 17.45      clus C  
ATOM   3004  CG  LEU A 391      -9.271  46.291   7.752  1.00 18.10      clus C  
ATOM   3005  CD1 LEU A 391     -10.324  46.238   6.659  1.00 14.37      clus C  
ATOM   3006  CD2 LEU A 391      -9.918  46.776   9.031  1.00 17.98      clus C  
ATOM   3007  N   GLU A 392      -8.196  41.702   6.909  1.00 13.39      clus N  
ATOM   3008  CA  GLU A 392      -7.434  40.459   7.013  1.00 19.40      clus C  
ATOM   3009  C   GLU A 392      -6.104  40.520   6.316  1.00 17.04      clus C  
ATOM   3010  O   GLU A 392      -6.034  40.810   5.121  1.00 12.51      clus O  
ATOM   3011  CB  GLU A 392      -8.210  39.281   6.416  1.00 28.89      clus C  
ATOM   3012  CG  GLU A 392      -9.647  39.152   6.894  1.00 48.12      clus C  
ATOM   3013  CD  GLU A 392     -10.313  37.863   6.439  1.00 51.68      clus C  
ATOM   3014  OE1 GLU A 392      -9.858  36.784   6.871  1.00 58.08      clus O  
ATOM   3015  OE2 GLU A 392     -11.298  37.933   5.669  1.00 49.52      clus O1-
ATOM   3016  N   GLY A 393      -5.054  40.168   7.047  1.00 18.53      clus N  
ATOM   3017  CA  GLY A 393      -3.726  40.174   6.465  1.00 22.87      clus C  
ATOM   3018  C   GLY A 393      -3.718  39.289   5.242  1.00 27.21      clus C  
ATOM   3019  O   GLY A 393      -4.553  38.387   5.131  1.00 27.44      clus O  
ATOM   3020  N   GLN A 394      -2.824  39.571   4.301  1.00 30.79      clus N  
ATOM   3021  CA  GLN A 394      -2.743  38.764   3.095  1.00 37.29      clus C  
ATOM   3022  C   GLN A 394      -1.308  38.582   2.641  1.00 38.84      clus C  
ATOM   3023  O   GLN A 394      -0.984  38.694   1.461  1.00 46.15      clus O  
ATOM   3024  CB  GLN A 394      -3.622  39.341   1.977  1.00 40.22      clus C  
ATOM   3025  CG  GLN A 394      -3.109  40.602   1.305  1.00 52.72      clus C  
ATOM   3026  CD  GLN A 394      -3.202  41.844   2.170  1.00 60.06      clus C  
ATOM   3027  NE2 GLN A 394      -4.092  41.826   3.162  1.00 62.20      clus N  
ATOM   3028  OE1 GLN A 394      -2.495  42.822   1.926  1.00 58.90      clus O  
ATOM   3029  N   TRP A 395      -0.439  38.284   3.593  1.00 38.32      clus N  
ATOM   3030  CA  TRP A 395       0.953  38.081   3.263  1.00 38.07      clus C  
ATOM   3031  C   TRP A 395       1.447  36.809   3.889  1.00 32.55      clus C  
ATOM   3032  O   TRP A 395       0.949  36.401   4.929  1.00 37.92      clus O  
ATOM   3033  CB  TRP A 395       1.780  39.285   3.688  1.00 42.34      clus C  
ATOM   3034  CG  TRP A 395       1.372  40.509   2.945  1.00 46.66      clus C  
ATOM   3035  CD1 TRP A 395       0.638  41.551   3.424  1.00 47.04      clus C  
ATOM   3036  CD2 TRP A 395       1.620  40.783   1.568  1.00 49.02      clus C  
ATOM   3037  CE2 TRP A 395       0.992  42.020   1.272  1.00 49.62      clus C  
ATOM   3038  CE3 TRP A 395       2.304  40.117   0.547  1.00 50.31      clus C  
ATOM   3039  NE1 TRP A 395       0.402  42.461   2.425  1.00 47.05      clus N  
ATOM   3040  CZ2 TRP A 395       1.035  42.597   0.000  1.00 54.43      clus C  
ATOM   3041  CZ3 TRP A 395       2.348  40.690  -0.722  1.00 55.82      clus C  
ATOM   3042  CH2 TRP A 395       1.714  41.921  -0.982  1.00 57.71      clus C  
ATOM   3043  N   ALA A 396       2.424  36.191   3.234  1.00 37.13      clus N  
ATOM   3044  CA  ALA A 396       3.012  34.918   3.638  1.00 44.41      clus C  
ATOM   3045  C   ALA A 396       3.473  34.757   5.089  1.00 46.89      clus C  
ATOM   3046  O   ALA A 396       2.658  34.718   6.003  1.00 47.42      clus O  
ATOM   3047  CB  ALA A 396       4.138  34.565   2.681  1.00 52.01      clus C  
ATOM   3048  N   ALA A 397       4.775  34.554   5.268  1.00 50.24      clus N  
ATOM   3049  CA  ALA A 397       5.397  34.378   6.581  1.00 59.16      clus C  
ATOM   3050  C   ALA A 397       6.859  34.775   6.425  1.00 66.64      clus C  
ATOM   3051  O   ALA A 397       7.310  35.769   7.001  1.00 71.35      clus O  
ATOM   3052  CB  ALA A 397       5.292  32.935   7.030  1.00 56.34      clus C  
ATOM   3053  N   ARG A 398       7.592  33.983   5.646  1.00 70.95      clus N  
ATOM   3054  CA  ARG A 398       9.003  34.233   5.336  1.00 72.11      clus C  
ATOM   3055  C   ARG A 398      10.092  34.105   6.431  1.00 65.79      clus C  
ATOM   3056  O   ARG A 398      11.281  34.095   6.094  1.00 71.60      clus O  
ATOM   3057  CB  ARG A 398       9.139  35.559   4.544  1.00 78.82      clus C  
ATOM   3058  CG  ARG A 398       8.695  35.455   3.061  1.00 83.53      clus C  
ATOM   3059  CD  ARG A 398       8.365  36.804   2.394  1.00 89.57      clus C  
ATOM   3060  NE  ARG A 398       6.990  37.252   2.654  1.00 91.95      clus N  
ATOM   3061  CZ  ARG A 398       6.150  37.727   1.731  1.00 90.90      clus C  
ATOM   3062  NH1 ARG A 398       6.525  37.828   0.462  1.00 90.77      clus N1+
ATOM   3063  NH2 ARG A 398       4.922  38.094   2.077  1.00 89.94      clus N  
ATOM   3064  N   SER A 399       9.706  33.986   7.709  1.00 57.79      clus N  
ATOM   3065  CA  SER A 399      10.665  33.840   8.832  1.00 50.31      clus C  
ATOM   3066  C   SER A 399      10.007  33.857  10.214  1.00 47.56      clus C  
ATOM   3067  O   SER A 399      10.418  33.134  11.130  1.00 46.03      clus O  
ATOM   3068  CB  SER A 399      11.744  34.930   8.803  1.00 52.50      clus C  
ATOM   3069  OG  SER A 399      12.571  34.858   9.959  1.00 54.84      clus O  
ATOM   3070  N   MET A 400       9.045  34.762  10.368  1.00 40.98      clus N  
ATOM   3071  CA  MET A 400       8.290  34.948  11.599  1.00 30.90      clus C  
ATOM   3072  C   MET A 400       6.915  35.472  11.167  1.00 24.44      clus C  
ATOM   3073  O   MET A 400       6.731  35.831  10.002  1.00 17.31      clus O  
ATOM   3074  CB  MET A 400       8.998  35.971  12.503  1.00 33.38      clus C  
ATOM   3075  CG  MET A 400       8.862  37.440  12.063  1.00 30.52      clus C  
ATOM   3076  SD  MET A 400       9.503  38.655  13.275  1.00 32.83      clus S  
ATOM   3077  CE  MET A 400       8.073  38.852  14.402  1.00 33.92      clus C  
ATOM   3078  N   PRO A 401       5.936  35.530  12.089  1.00 16.07      clus N  
ATOM   3079  CA  PRO A 401       4.598  36.022  11.735  1.00 14.58      clus C  
ATOM   3080  C   PRO A 401       4.564  37.446  11.164  1.00 11.89      clus C  
ATOM   3081  O   PRO A 401       5.261  38.335  11.663  1.00 16.15      clus O  
ATOM   3082  CB  PRO A 401       3.840  35.940  13.070  1.00  9.21      clus C  
ATOM   3083  CG  PRO A 401       4.934  36.068  14.096  1.00  2.00      clus C  
ATOM   3084  CD  PRO A 401       5.979  35.159  13.513  1.00 10.11      clus C  
ATOM   3085  N   PRO A 402       3.747  37.678  10.115  1.00  8.92      clus N  
ATOM   3086  CA  PRO A 402       3.632  39.000   9.493  1.00  9.24      clus C  
ATOM   3087  C   PRO A 402       3.255  40.054  10.540  1.00 11.22      clus C  
ATOM   3088  O   PRO A 402       3.522  41.239  10.370  1.00 16.16      clus O  
ATOM   3089  CB  PRO A 402       2.496  38.802   8.492  1.00  6.52      clus C  
ATOM   3090  CG  PRO A 402       2.638  37.403   8.109  1.00 10.43      clus C  
ATOM   3091  CD  PRO A 402       2.870  36.716   9.425  1.00  5.28      clus C  
ATOM   3092  N   SER A 403       2.643  39.606  11.630  1.00  8.46      clus N  
ATOM   3093  CA  SER A 403       2.220  40.497  12.696  1.00 10.71      clus C  
ATOM   3094  C   SER A 403       1.409  41.666  12.133  1.00 12.58      clus C  
ATOM   3095  O   SER A 403       1.575  42.814  12.561  1.00 17.95      clus O  
ATOM   3096  CB  SER A 403       3.426  40.988  13.496  1.00 10.13      clus C  
ATOM   3097  OG  SER A 403       4.076  39.923  14.174  1.00  2.00      clus O  
ATOM   3098  N   PHE A 404       0.559  41.349  11.149  1.00 12.47      clus N  
ATOM   3099  CA  PHE A 404      -0.315  42.315  10.491  1.00  8.51      clus C  
ATOM   3100  C   PHE A 404      -1.238  42.866  11.541  1.00  5.80      clus C  
ATOM   3101  O   PHE A 404      -1.953  42.113  12.195  1.00  8.04      clus O  
ATOM   3102  CB  PHE A 404      -1.129  41.635   9.389  1.00  2.73      clus C  
ATOM   3103  CG  PHE A 404      -2.303  42.453   8.882  1.00  3.20      clus C  
ATOM   3104  CD1 PHE A 404      -2.163  43.300   7.782  1.00  3.89      clus C  
ATOM   3105  CD2 PHE A 404      -3.558  42.344   9.488  1.00  3.59      clus C  
ATOM   3106  CE1 PHE A 404      -3.245  44.021   7.293  1.00  2.00      clus C  
ATOM   3107  CE2 PHE A 404      -4.644  43.057   9.010  1.00  2.00      clus C  
ATOM   3108  CZ  PHE A 404      -4.490  43.900   7.908  1.00  2.00      clus C  
ATOM   3109  N   GLY A 405      -1.204  44.182  11.703  1.00  8.46      clus N  
ATOM   3110  CA  GLY A 405      -2.028  44.822  12.706  1.00  8.74      clus C  
ATOM   3111  C   GLY A 405      -1.284  45.073  14.007  1.00  9.87      clus C  
ATOM   3112  O   GLY A 405      -1.886  45.524  14.974  1.00 16.44      clus O  
ATOM   3113  N   TYR A 406       0.016  44.792  14.045  1.00 10.34      clus N  
ATOM   3114  CA  TYR A 406       0.789  45.006  15.269  1.00 13.26      clus C  
ATOM   3115  C   TYR A 406       0.897  46.502  15.556  1.00 17.76      clus C  
ATOM   3116  O   TYR A 406       1.192  46.923  16.675  1.00 21.74      clus O  
ATOM   3117  CB  TYR A 406       2.197  44.399  15.153  1.00 13.41      clus C  
ATOM   3118  CG  TYR A 406       2.969  44.329  16.476  1.00  8.23      clus C  
ATOM   3119  CD1 TYR A 406       2.771  43.280  17.369  1.00  6.28      clus C  
ATOM   3120  CD2 TYR A 406       3.907  45.298  16.818  1.00  2.32      clus C  
ATOM   3121  CE1 TYR A 406       3.486  43.198  18.562  1.00  9.48      clus C  
ATOM   3122  CE2 TYR A 406       4.627  45.223  18.013  1.00  6.80      clus C  
ATOM   3123  CZ  TYR A 406       4.413  44.171  18.880  1.00  7.23      clus C  
ATOM   3124  OH  TYR A 406       5.132  44.087  20.058  1.00  8.66      clus O  
ATOM   3125  N   SER A 407       0.635  47.298  14.531  1.00 17.92      clus N  
ATOM   3126  CA  SER A 407       0.714  48.740  14.643  1.00 15.46      clus C  
ATOM   3127  C   SER A 407      -0.245  49.312  13.637  1.00 12.82      clus C  
ATOM   3128  O   SER A 407      -0.410  48.773  12.548  1.00 12.58      clus O  
ATOM   3129  CB  SER A 407       2.120  49.209  14.298  1.00 15.03      clus C  
ATOM   3130  OG  SER A 407       2.418  48.909  12.946  1.00 10.65      clus O  
ATOM   3131  N   MET A 408      -0.866  50.421  13.994  1.00 12.64      clus N  
ATOM   3132  CA  MET A 408      -1.808  51.047  13.096  1.00 16.18      clus C  
ATOM   3133  C   MET A 408      -2.193  52.431  13.559  1.00 14.65      clus C  
ATOM   3134  O   MET A 408      -2.145  52.743  14.749  1.00 17.51      clus O  
ATOM   3135  CB  MET A 408      -3.047  50.169  12.923  1.00 12.10      clus C  
ATOM   3136  CG  MET A 408      -3.507  49.476  14.188  1.00 14.31      clus C  
ATOM   3137  SD  MET A 408      -4.763  48.277  13.810  1.00 14.31      clus S  
ATOM   3138  CE  MET A 408      -6.125  49.095  14.478  1.00 21.93      clus C  
ATOM   3139  N   LYS A 409      -2.532  53.268  12.589  1.00 13.96      clus N  
ATOM   3140  CA  LYS A 409      -2.936  54.633  12.850  1.00 13.46      clus C  
ATOM   3141  C   LYS A 409      -4.015  55.045  11.866  1.00  7.95      clus C  
ATOM   3142  O   LYS A 409      -3.977  54.716  10.675  1.00  2.00      clus O  
ATOM   3143  CB  LYS A 409      -1.739  55.566  12.733  1.00 19.28      clus C  
ATOM   3144  CG  LYS A 409      -2.068  57.047  12.869  1.00 21.06      clus C  
ATOM   3145  CD  LYS A 409      -2.006  57.526  14.300  1.00 19.11      clus C  
ATOM   3146  CE  LYS A 409      -2.083  59.047  14.351  1.00 26.20      clus C  
ATOM   3147  NZ  LYS A 409      -1.792  59.616  15.712  1.00 39.64      clus N1+
ATOM   3148  N   GLY A 410      -4.996  55.753  12.391  1.00  2.78      clus N  
ATOM   3149  CA  GLY A 410      -6.089  56.220  11.569  1.00 18.39      clus C  
ATOM   3150  C   GLY A 410      -6.747  57.337  12.335  1.00 24.89      clus C  
ATOM   3151  O   GLY A 410      -6.845  57.264  13.552  1.00 35.54      clus O  
ATOM   3152  N   ALA A 411      -7.117  58.400  11.640  1.00 20.68      clus N  
ATOM   3153  CA  ALA A 411      -7.768  59.549  12.252  1.00 20.45      clus C  
ATOM   3154  C   ALA A 411      -7.628  60.708  11.283  1.00 22.88      clus C  
ATOM   3155  O   ALA A 411      -8.021  61.837  11.594  1.00 23.52      clus O  
ATOM   3156  CB  ALA A 411      -7.138  59.909  13.590  1.00 14.37      clus C  
ATOM   3157  N   THR A 412      -7.020  60.435  10.129  1.00 21.04      clus N  
ATOM   3158  CA  THR A 412      -6.853  61.458   9.113  1.00 18.05      clus C  
ATOM   3159  C   THR A 412      -7.260  60.941   7.738  1.00 17.55      clus C  
ATOM   3160  O   THR A 412      -6.907  59.835   7.341  1.00 12.65      clus O  
ATOM   3161  CB  THR A 412      -5.398  62.021   9.058  1.00 17.39      clus C  
ATOM   3162  CG2 THR A 412      -4.852  62.285  10.465  1.00 14.49      clus C  
ATOM   3163  OG1 THR A 412      -4.535  61.100   8.389  1.00  2.08      clus O  
ATOM   3164  N   ASP A 413      -8.044  61.750   7.042  1.00 16.30      clus N  
ATOM   3165  CA  ASP A 413      -8.529  61.454   5.705  1.00 10.83      clus C  
ATOM   3166  C   ASP A 413      -7.401  61.793   4.737  1.00  4.44      clus C  
ATOM   3167  O   ASP A 413      -7.293  62.913   4.266  1.00  6.89      clus O  
ATOM   3168  CB  ASP A 413      -9.778  62.316   5.447  1.00 18.63      clus C  
ATOM   3169  CG  ASP A 413     -10.102  62.498   3.972  1.00 26.92      clus C  
ATOM   3170  OD1 ASP A 413      -9.684  61.685   3.120  1.00 24.78      clus O  
ATOM   3171  OD2 ASP A 413     -10.790  63.494   3.666  1.00 24.28      clus O1-
ATOM   3172  N   ILE A 414      -6.591  60.808   4.396  1.00  3.41      clus N  
ATOM   3173  CA  ILE A 414      -5.469  61.060   3.514  1.00 12.32      clus C  
ATOM   3174  C   ILE A 414      -5.834  61.497   2.093  1.00 15.60      clus C  
ATOM   3175  O   ILE A 414      -4.954  61.601   1.221  1.00 15.20      clus O  
ATOM   3176  CB  ILE A 414      -4.537  59.848   3.474  1.00 16.68      clus C  
ATOM   3177  CG1 ILE A 414      -3.109  60.297   3.159  1.00 12.39      clus C  
ATOM   3178  CG2 ILE A 414      -5.064  58.804   2.477  1.00 14.81      clus C  
ATOM   3179  CD1 ILE A 414      -2.045  59.278   3.531  1.00  2.00      clus C  
ATOM   3180  N   ASP A 415      -7.116  61.772   1.855  1.00 16.64      clus N  
ATOM   3181  CA  ASP A 415      -7.528  62.200   0.526  1.00 21.28      clus C  
ATOM   3182  C   ASP A 415      -8.797  63.059   0.416  1.00 26.66      clus C  
ATOM   3183  O   ASP A 415      -9.237  63.738   1.358  1.00 14.75      clus O  
ATOM   3184  CB  ASP A 415      -7.609  60.990  -0.424  1.00 20.35      clus C  
ATOM   3185  CG  ASP A 415      -8.744  60.042  -0.083  1.00 31.24      clus C  
ATOM   3186  OD1 ASP A 415      -9.077  59.166  -0.907  1.00 32.02      clus O  
ATOM   3187  OD2 ASP A 415      -9.316  60.174   1.007  1.00 29.51      clus O1-
ATOM   3188  N   LYS A 416      -9.356  63.039  -0.783  1.00 35.07      clus N  
ATOM   3189  CA  LYS A 416     -10.550  63.795  -1.107  1.00 37.38      clus C  
ATOM   3190  C   LYS A 416     -11.679  63.540  -0.108  1.00 35.40      clus C  
ATOM   3191  O   LYS A 416     -11.804  64.281   0.875  1.00 30.92      clus O  
ATOM   3192  CB  LYS A 416     -10.998  63.463  -2.542  1.00 44.06      clus C  
ATOM   3193  CG  LYS A 416      -9.866  63.525  -3.604  1.00 54.89      clus C  
ATOM   3194  CD  LYS A 416      -8.976  62.271  -3.586  1.00 58.51      clus C  
ATOM   3195  CE  LYS A 416      -7.770  62.400  -4.509  1.00 61.13      clus C  
ATOM   3196  NZ  LYS A 416      -6.838  63.475  -4.086  1.00 52.48      clus N1+
ATOM   3197  N   ASN A 417     -12.412  62.442  -0.337  1.00 30.69      clus N  
ATOM   3198  CA  ASN A 417     -13.573  61.996   0.448  1.00 25.95      clus C  
ATOM   3199  C   ASN A 417     -13.517  62.270   1.930  1.00 19.45      clus C  
ATOM   3200  O   ASN A 417     -12.629  61.771   2.604  1.00 24.94      clus O  
ATOM   3201  CB  ASN A 417     -13.814  60.507   0.209  1.00 29.65      clus C  
ATOM   3202  CG  ASN A 417     -12.765  59.634   0.857  1.00 32.26      clus C  
ATOM   3203  ND2 ASN A 417     -11.675  59.376   0.139  1.00 26.62      clus N  
ATOM   3204  OD1 ASN A 417     -12.935  59.189   1.996  1.00 38.68      clus O  
ATOM   3205  N   GLY A 418     -14.502  63.008   2.439  1.00 23.67      clus N  
ATOM   3206  CA  GLY A 418     -14.539  63.367   3.856  1.00 26.90      clus C  
ATOM   3207  C   GLY A 418     -14.633  62.237   4.871  1.00 28.15      clus C  
ATOM   3208  O   GLY A 418     -15.430  62.294   5.811  1.00 29.63      clus O  
ATOM   3209  N   TYR A 419     -13.763  61.244   4.723  1.00 24.24      clus N  
ATOM   3210  CA  TYR A 419     -13.750  60.089   5.596  1.00 18.06      clus C  
ATOM   3211  C   TYR A 419     -12.328  59.713   5.990  1.00 10.56      clus C  
ATOM   3212  O   TYR A 419     -11.439  59.662   5.149  1.00  2.00      clus O  
ATOM   3213  CB  TYR A 419     -14.441  58.923   4.891  1.00 28.20      clus C  
ATOM   3214  CG  TYR A 419     -15.935  59.122   4.711  1.00 33.23      clus C  
ATOM   3215  CD1 TYR A 419     -16.484  59.390   3.456  1.00 34.58      clus C  
ATOM   3216  CD2 TYR A 419     -16.797  59.050   5.803  1.00 34.42      clus C  
ATOM   3217  CE1 TYR A 419     -17.860  59.587   3.301  1.00 36.88      clus C  
ATOM   3218  CE2 TYR A 419     -18.164  59.241   5.654  1.00 32.78      clus C  
ATOM   3219  CZ  TYR A 419     -18.688  59.510   4.410  1.00 36.69      clus C  
ATOM   3220  OH  TYR A 419     -20.042  59.718   4.301  1.00 36.42      clus O  
ATOM   3221  N   PRO A 420     -12.097  59.455   7.295  1.00  7.06      clus N  
ATOM   3222  CA  PRO A 420     -10.795  59.082   7.869  1.00  4.86      clus C  
ATOM   3223  C   PRO A 420     -10.302  57.767   7.329  1.00 10.82      clus C  
ATOM   3224  O   PRO A 420     -11.092  56.868   7.089  1.00 18.76      clus O  
ATOM   3225  CB  PRO A 420     -11.104  58.937   9.360  1.00  4.09      clus C  
ATOM   3226  CG  PRO A 420     -12.278  59.871   9.564  1.00  2.32      clus C  
ATOM   3227  CD  PRO A 420     -13.116  59.567   8.361  1.00  2.07      clus C  
ATOM   3228  N   ASP A 421      -8.998  57.651   7.146  1.00 12.88      clus N  
ATOM   3229  CA  ASP A 421      -8.424  56.404   6.663  1.00  6.71      clus C  
ATOM   3230  C   ASP A 421      -7.633  55.659   7.739  1.00 10.41      clus C  
ATOM   3231  O   ASP A 421      -7.647  56.041   8.927  1.00 10.73      clus O  
ATOM   3232  CB  ASP A 421      -7.600  56.656   5.411  1.00  8.59      clus C  
ATOM   3233  CG  ASP A 421      -8.443  57.185   4.284  1.00 24.14      clus C  
ATOM   3234  OD1 ASP A 421      -9.670  57.277   4.466  1.00 26.52      clus O  
ATOM   3235  OD2 ASP A 421      -7.895  57.507   3.217  1.00 34.15      clus O1-
ATOM   3236  N   LEU A 422      -6.984  54.569   7.334  1.00  8.98      clus N  
ATOM   3237  CA  LEU A 422      -6.220  53.770   8.277  1.00  9.04      clus C  
ATOM   3238  C   LEU A 422      -4.994  53.088   7.666  1.00  4.02      clus C  
ATOM   3239  O   LEU A 422      -5.037  52.619   6.529  1.00  2.00      clus O  
ATOM   3240  CB  LEU A 422      -7.150  52.737   8.908  1.00 15.36      clus C  
ATOM   3241  CG  LEU A 422      -6.773  52.178  10.278  1.00 21.21      clus C  
ATOM   3242  CD1 LEU A 422      -7.970  51.500  10.815  1.00 11.26      clus C  
ATOM   3243  CD2 LEU A 422      -5.616  51.197  10.217  1.00 22.32      clus C  
ATOM   3244  N   ILE A 423      -3.896  53.089   8.424  1.00  6.45      clus N  
ATOM   3245  CA  ILE A 423      -2.640  52.454   8.014  1.00 15.33      clus C  
ATOM   3246  C   ILE A 423      -2.348  51.320   8.987  1.00 14.28      clus C  
ATOM   3247  O   ILE A 423      -2.123  51.563  10.173  1.00 18.87      clus O  
ATOM   3248  CB  ILE A 423      -1.414  53.401   8.115  1.00 17.44      clus C  
ATOM   3249  CG1 ILE A 423      -1.677  54.715   7.390  1.00 17.66      clus C  
ATOM   3250  CG2 ILE A 423      -0.179  52.718   7.533  1.00 11.23      clus C  
ATOM   3251  CD1 ILE A 423      -0.663  55.779   7.697  1.00 17.06      clus C  
ATOM   3252  N   VAL A 424      -2.354  50.088   8.492  1.00  9.87      clus N  
ATOM   3253  CA  VAL A 424      -2.066  48.929   9.331  1.00  8.59      clus C  
ATOM   3254  C   VAL A 424      -0.664  48.512   8.942  1.00  6.32      clus C  
ATOM   3255  O   VAL A 424      -0.305  48.582   7.771  1.00 15.45      clus O  
ATOM   3256  CB  VAL A 424      -3.046  47.760   9.061  1.00  9.62      clus C  
ATOM   3257  CG1 VAL A 424      -2.873  46.679  10.100  1.00  4.83      clus C  
ATOM   3258  CG2 VAL A 424      -4.500  48.256   9.055  1.00 15.41      clus C  
ATOM   3259  N   GLY A 425       0.140  48.114   9.917  1.00  2.00      clus N  
ATOM   3260  CA  GLY A 425       1.501  47.724   9.610  1.00  2.00      clus C  
ATOM   3261  C   GLY A 425       1.859  46.303   9.994  1.00 16.43      clus C  
ATOM   3262  O   GLY A 425       1.584  45.864  11.122  1.00 17.78      clus O  
ATOM   3263  N   ALA A 426       2.511  45.602   9.064  1.00  8.01      clus N  
ATOM   3264  CA  ALA A 426       2.934  44.218   9.274  1.00  6.84      clus C  
ATOM   3265  C   ALA A 426       4.448  44.053   9.143  1.00  7.20      clus C  
ATOM   3266  O   ALA A 426       4.953  43.769   8.059  1.00 13.29      clus O  
ATOM   3267  CB  ALA A 426       2.230  43.308   8.283  1.00  4.76      clus C  
ATOM   3268  N   PHE A 427       5.172  44.149  10.251  1.00  7.83      clus N  
ATOM   3269  CA  PHE A 427       6.622  44.029  10.167  1.00  9.43      clus C  
ATOM   3270  C   PHE A 427       7.206  42.641   9.878  1.00 11.92      clus C  
ATOM   3271  O   PHE A 427       8.400  42.517   9.561  1.00 12.85      clus O  
ATOM   3272  CB  PHE A 427       7.276  44.637  11.395  1.00  2.47      clus C  
ATOM   3273  CG  PHE A 427       6.989  43.913  12.660  1.00  2.00      clus C  
ATOM   3274  CD1 PHE A 427       7.905  43.006  13.168  1.00  2.00      clus C  
ATOM   3275  CD2 PHE A 427       5.858  44.209  13.397  1.00  6.27      clus C  
ATOM   3276  CE1 PHE A 427       7.711  42.413  14.392  1.00  2.00      clus C  
ATOM   3277  CE2 PHE A 427       5.656  43.621  14.630  1.00  5.08      clus C  
ATOM   3278  CZ  PHE A 427       6.587  42.721  15.128  1.00  2.00      clus C  
ATOM   3279  N   GLY A 428       6.374  41.608   9.982  1.00 14.08      clus N  
ATOM   3280  CA  GLY A 428       6.826  40.252   9.716  1.00 15.25      clus C  
ATOM   3281  C   GLY A 428       7.033  40.019   8.229  1.00 22.16      clus C  
ATOM   3282  O   GLY A 428       7.550  38.964   7.813  1.00 19.76      clus O  
ATOM   3283  N   VAL A 429       6.589  40.985   7.421  1.00 21.34      clus N  
ATOM   3284  CA  VAL A 429       6.746  40.915   5.974  1.00 28.93      clus C  
ATOM   3285  C   VAL A 429       7.365  42.210   5.425  1.00 29.75      clus C  
ATOM   3286  O   VAL A 429       7.806  42.252   4.272  1.00 36.47      clus O  
ATOM   3287  CB  VAL A 429       5.402  40.575   5.265  1.00 29.25      clus C  
ATOM   3288  CG1 VAL A 429       5.010  39.125   5.556  1.00 27.15      clus C  
ATOM   3289  CG2 VAL A 429       4.298  41.512   5.717  1.00 20.56      clus C  
ATOM   3290  N   ASP A 430       7.473  43.220   6.297  1.00 25.41      clus N  
ATOM   3291  CA  ASP A 430       8.034  44.549   5.994  1.00 13.24      clus C  
ATOM   3292  C   ASP A 430       7.119  45.358   5.075  1.00 11.68      clus C  
ATOM   3293  O   ASP A 430       7.521  45.811   3.998  1.00 14.20      clus O  
ATOM   3294  CB  ASP A 430       9.445  44.435   5.398  1.00  9.80      clus C  
ATOM   3295  CG  ASP A 430      10.425  43.705   6.325  1.00 20.96      clus C  
ATOM   3296  OD1 ASP A 430      11.381  43.098   5.812  1.00 21.89      clus O  
ATOM   3297  OD2 ASP A 430      10.247  43.722   7.562  1.00 26.76      clus O1-
ATOM   3298  N   ARG A 431       5.892  45.578   5.541  1.00  7.33      clus N  
ATOM   3299  CA  ARG A 431       4.890  46.295   4.770  1.00  5.63      clus C  
ATOM   3300  C   ARG A 431       3.939  47.108   5.626  1.00  7.75      clus C  
ATOM   3301  O   ARG A 431       3.832  46.908   6.838  1.00 12.89      clus O  
ATOM   3302  CB  ARG A 431       4.043  45.304   3.985  1.00 11.70      clus C  
ATOM   3303  CG  ARG A 431       4.752  44.521   2.907  1.00 20.96      clus C  
ATOM   3304  CD  ARG A 431       3.712  43.727   2.161  1.00 26.99      clus C  
ATOM   3305  NE  ARG A 431       4.100  43.426   0.792  1.00 30.32      clus N  
ATOM   3306  CZ  ARG A 431       4.976  42.492   0.455  1.00 34.27      clus C  
ATOM   3307  NH1 ARG A 431       5.567  41.764   1.391  1.00 34.19      clus N1+
ATOM   3308  NH2 ARG A 431       5.215  42.247  -0.823  1.00 43.33      clus N  
ATOM   3309  N   ALA A 432       3.203  47.993   4.963  1.00  4.93      clus N  
ATOM   3310  CA  ALA A 432       2.211  48.833   5.623  1.00  7.04      clus C  
ATOM   3311  C   ALA A 432       1.090  49.071   4.614  1.00  9.04      clus C  
ATOM   3312  O   ALA A 432       1.350  49.356   3.436  1.00 15.64      clus O  
ATOM   3313  CB  ALA A 432       2.824  50.148   6.073  1.00 14.80      clus C  
ATOM   3314  N   ILE A 433      -0.152  48.927   5.078  1.00  8.14      clus N  
ATOM   3315  CA  ILE A 433      -1.314  49.087   4.218  1.00 10.51      clus C  
ATOM   3316  C   ILE A 433      -2.209  50.259   4.538  1.00 15.90      clus C  
ATOM   3317  O   ILE A 433      -2.684  50.412   5.663  1.00 18.17      clus O  
ATOM   3318  CB  ILE A 433      -2.190  47.850   4.241  1.00 11.41      clus C  
ATOM   3319  CG1 ILE A 433      -1.337  46.623   3.981  1.00  9.27      clus C  
ATOM   3320  CG2 ILE A 433      -3.242  47.958   3.152  1.00 10.10      clus C  
ATOM   3321  CD1 ILE A 433      -0.614  46.691   2.644  1.00 13.79      clus C  
ATOM   3322  N   LEU A 434      -2.483  51.060   3.521  1.00  8.84      clus N  
ATOM   3323  CA  LEU A 434      -3.343  52.195   3.713  1.00  7.74      clus C  
ATOM   3324  C   LEU A 434      -4.686  51.759   3.178  1.00  9.04      clus C  
ATOM   3325  O   LEU A 434      -4.789  51.324   2.041  1.00 13.72      clus O  
ATOM   3326  CB  LEU A 434      -2.795  53.400   2.958  1.00  2.87      clus C  
ATOM   3327  CG  LEU A 434      -3.535  54.741   3.049  1.00  3.05      clus C  
ATOM   3328  CD1 LEU A 434      -4.667  54.827   2.033  1.00  3.00      clus C  
ATOM   3329  CD2 LEU A 434      -4.053  54.963   4.447  1.00  3.77      clus C  
ATOM   3330  N   TYR A 435      -5.693  51.792   4.039  1.00  7.23      clus N  
ATOM   3331  CA  TYR A 435      -7.040  51.413   3.663  1.00  7.66      clus C  
ATOM   3332  C   TYR A 435      -7.865  52.670   3.658  1.00  8.61      clus C  
ATOM   3333  O   TYR A 435      -7.994  53.306   4.702  1.00 19.64      clus O  
ATOM   3334  CB  TYR A 435      -7.622  50.461   4.704  1.00  6.19      clus C  
ATOM   3335  CG  TYR A 435      -7.079  49.050   4.657  1.00  3.41      clus C  
ATOM   3336  CD1 TYR A 435      -6.161  48.601   5.597  1.00  2.00      clus C  
ATOM   3337  CD2 TYR A 435      -7.532  48.151   3.697  1.00  8.30      clus C  
ATOM   3338  CE1 TYR A 435      -5.718  47.292   5.584  1.00  6.51      clus C  
ATOM   3339  CE2 TYR A 435      -7.093  46.845   3.672  1.00 11.80      clus C  
ATOM   3340  CZ  TYR A 435      -6.191  46.415   4.617  1.00 11.17      clus C  
ATOM   3341  OH  TYR A 435      -5.780  45.099   4.598  1.00 11.88      clus O  
ATOM   3342  N   ARG A 436      -8.452  53.017   2.514  1.00 11.08      clus N  
ATOM   3343  CA  ARG A 436      -9.267  54.241   2.428  1.00 15.72      clus C  
ATOM   3344  C   ARG A 436     -10.744  54.060   2.805  1.00 14.11      clus C  
ATOM   3345  O   ARG A 436     -11.386  53.102   2.386  1.00 16.12      clus O  
ATOM   3346  CB  ARG A 436      -9.183  54.847   1.019  1.00 23.63      clus C  
ATOM   3347  CG  ARG A 436      -7.769  55.070   0.500  1.00 25.88      clus C  
ATOM   3348  CD  ARG A 436      -7.717  55.194  -1.021  1.00 24.39      clus C  
ATOM   3349  NE  ARG A 436      -8.557  56.277  -1.527  1.00 22.74      clus N  
ATOM   3350  CZ  ARG A 436      -8.828  56.473  -2.816  1.00 27.43      clus C  
ATOM   3351  NH1 ARG A 436      -8.332  55.657  -3.740  1.00 19.20      clus N1+
ATOM   3352  NH2 ARG A 436      -9.576  57.502  -3.187  1.00 37.52      clus N  
ATOM   3353  N   ALA A 437     -11.286  54.988   3.580  1.00  8.19      clus N  
ATOM   3354  CA  ALA A 437     -12.691  54.907   3.952  1.00 11.63      clus C  
ATOM   3355  C   ALA A 437     -13.553  55.232   2.746  1.00 21.32      clus C  
ATOM   3356  O   ALA A 437     -13.239  56.143   1.983  1.00 26.61      clus O  
ATOM   3357  CB  ALA A 437     -13.013  55.863   5.070  1.00  3.21      clus C  
ATOM   3358  N   ARG A 438     -14.632  54.467   2.579  1.00 27.90      clus N  
ATOM   3359  CA  ARG A 438     -15.573  54.655   1.483  1.00 21.19      clus C  
ATOM   3360  C   ARG A 438     -16.744  55.511   1.923  1.00 23.34      clus C  
ATOM   3361  O   ARG A 438     -17.146  55.463   3.084  1.00 19.73      clus O  
ATOM   3362  CB  ARG A 438     -16.108  53.316   1.012  1.00 16.47      clus C  
ATOM   3363  CG  ARG A 438     -15.155  52.574   0.139  1.00 27.93      clus C  
ATOM   3364  CD  ARG A 438     -15.615  51.147  -0.066  1.00 34.90      clus C  
ATOM   3365  NE  ARG A 438     -16.848  51.031  -0.835  1.00 35.14      clus N  
ATOM   3366  CZ  ARG A 438     -17.501  49.888  -1.013  1.00 35.04      clus C  
ATOM   3367  NH1 ARG A 438     -17.037  48.775  -0.468  1.00 39.57      clus N1+
ATOM   3368  NH2 ARG A 438     -18.598  49.851  -1.758  1.00 31.35      clus N  
ATOM   3369  N   PRO A 439     -17.300  56.314   0.998  1.00 23.73      clus N  
ATOM   3370  CA  PRO A 439     -18.437  57.223   1.194  1.00 27.14      clus C  
ATOM   3371  C   PRO A 439     -19.759  56.488   1.438  1.00 23.12      clus C  
ATOM   3372  O   PRO A 439     -20.184  55.680   0.626  1.00 23.55      clus O  
ATOM   3373  CB  PRO A 439     -18.469  58.016  -0.114  1.00 32.88      clus C  
ATOM   3374  CG  PRO A 439     -17.035  57.995  -0.568  1.00 33.75      clus C  
ATOM   3375  CD  PRO A 439     -16.673  56.556  -0.316  1.00 34.20      clus C  
ATOM   3376  N   VAL A 440     -20.428  56.824   2.534  1.00 18.74      clus N  
ATOM   3377  CA  VAL A 440     -21.681  56.179   2.925  1.00 20.47      clus C  
ATOM   3378  C   VAL A 440     -22.968  56.910   2.530  1.00 21.72      clus C  
ATOM   3379  O   VAL A 440     -23.248  57.986   3.073  1.00 19.31      clus O  
ATOM   3380  CB  VAL A 440     -21.723  55.998   4.471  1.00 21.49      clus C  
ATOM   3381  CG1 VAL A 440     -22.966  55.271   4.896  1.00 22.66      clus C  
ATOM   3382  CG2 VAL A 440     -20.491  55.280   4.961  1.00 22.02      clus C  
ATOM   3383  N   ILE A 441     -23.776  56.306   1.648  1.00 27.31      clus N  
ATOM   3384  CA  ILE A 441     -25.066  56.896   1.251  1.00 26.23      clus C  
ATOM   3385  C   ILE A 441     -26.253  56.232   1.935  1.00 23.47      clus C  
ATOM   3386  O   ILE A 441     -26.370  55.011   1.941  1.00 21.35      clus O  
ATOM   3387  CB  ILE A 441     -25.352  56.807  -0.265  1.00 25.92      clus C  
ATOM   3388  CG1 ILE A 441     -25.138  55.393  -0.786  1.00 32.83      clus C  
ATOM   3389  CG2 ILE A 441     -24.522  57.791  -1.018  1.00 27.25      clus C  
ATOM   3390  CD1 ILE A 441     -25.525  55.234  -2.235  1.00 40.59      clus C  
ATOM   3391  N   THR A 442     -27.118  57.035   2.538  1.00 28.09      clus N  
ATOM   3392  CA  THR A 442     -28.317  56.495   3.171  1.00 39.27      clus C  
ATOM   3393  C   THR A 442     -29.469  56.811   2.210  1.00 45.88      clus C  
ATOM   3394  O   THR A 442     -29.760  57.977   1.925  1.00 47.61      clus O  
ATOM   3395  CB  THR A 442     -28.575  57.103   4.577  1.00 32.65      clus C  
ATOM   3396  CG2 THR A 442     -27.293  57.120   5.383  1.00 18.22      clus C  
ATOM   3397  OG1 THR A 442     -29.065  58.442   4.456  1.00 34.08      clus O  
ATOM   3398  N   VAL A 443     -30.081  55.763   1.668  1.00 49.91      clus N  
ATOM   3399  CA  VAL A 443     -31.165  55.921   0.707  1.00 57.40      clus C  
ATOM   3400  C   VAL A 443     -32.525  55.442   1.223  1.00 60.63      clus C  
ATOM   3401  O   VAL A 443     -32.616  54.407   1.887  1.00 66.76      clus O  
ATOM   3402  CB  VAL A 443     -30.812  55.189  -0.605  1.00 52.99      clus C  
ATOM   3403  CG1 VAL A 443     -30.561  53.713  -0.334  1.00 60.02      clus C  
ATOM   3404  CG2 VAL A 443     -31.911  55.365  -1.633  1.00 50.69      clus C  
ATOM   3405  N   ASN A 444     -33.574  56.200   0.904  1.00 55.69      clus N  
ATOM   3406  CA  ASN A 444     -34.937  55.875   1.320  1.00 55.35      clus C  
ATOM   3407  C   ASN A 444     -35.807  55.270   0.230  1.00 53.31      clus C  
ATOM   3408  O   ASN A 444     -35.917  55.808  -0.872  1.00 52.62      clus O  
ATOM   3409  CB  ASN A 444     -35.643  57.108   1.859  1.00 56.95      clus C  
ATOM   3410  CG  ASN A 444     -35.342  57.357   3.305  1.00 53.86      clus C  
ATOM   3411  ND2 ASN A 444     -36.386  57.605   4.084  1.00 50.51      clus N  
ATOM   3412  OD1 ASN A 444     -34.186  57.334   3.727  1.00 51.03      clus O  
ATOM   3413  N   ALA A 445     -36.479  54.179   0.579  1.00 52.97      clus N  
ATOM   3414  CA  ALA A 445     -37.354  53.485  -0.351  1.00 47.03      clus C  
ATOM   3415  C   ALA A 445     -38.765  54.040  -0.279  1.00 41.90      clus C  
ATOM   3416  O   ALA A 445     -39.160  54.656   0.715  1.00 39.08      clus O  
ATOM   3417  CB  ALA A 445     -37.361  51.996  -0.046  1.00 45.82      clus C  
ATOM   3418  N   GLY A 446     -39.517  53.821  -1.350  1.00 41.95      clus N  
ATOM   3419  CA  GLY A 446     -40.893  54.274  -1.411  1.00 42.39      clus C  
ATOM   3420  C   GLY A 446     -41.685  53.304  -2.268  1.00 45.61      clus C  
ATOM   3421  O   GLY A 446     -41.223  52.899  -3.342  1.00 41.88      clus O  
ATOM   3422  N   LEU A 447     -42.861  52.903  -1.790  1.00 44.45      clus N  
ATOM   3423  CA  LEU A 447     -43.696  51.975  -2.533  1.00 42.24      clus C  
ATOM   3424  C   LEU A 447     -45.093  51.989  -1.981  1.00 48.96      clus C  
ATOM   3425  O   LEU A 447     -45.308  51.685  -0.807  1.00 48.66      clus O  
ATOM   3426  CB  LEU A 447     -43.144  50.555  -2.429  1.00 33.52      clus C  
ATOM   3427  CG  LEU A 447     -43.897  49.447  -3.167  1.00 20.41      clus C  
ATOM   3428  CD1 LEU A 447     -43.633  49.532  -4.660  1.00 15.79      clus C  
ATOM   3429  CD2 LEU A 447     -43.441  48.102  -2.651  1.00 20.88      clus C  
ATOM   3430  N   GLU A 448     -46.034  52.383  -2.829  1.00 56.14      clus N  
ATOM   3431  CA  GLU A 448     -47.447  52.417  -2.472  1.00 61.72      clus C  
ATOM   3432  C   GLU A 448     -48.237  52.211  -3.756  1.00 60.98      clus C  
ATOM   3433  O   GLU A 448     -47.894  52.768  -4.798  1.00 60.76      clus O  
ATOM   3434  CB  GLU A 448     -47.836  53.750  -1.816  1.00 65.62      clus C  
ATOM   3435  CG  GLU A 448     -47.235  54.007  -0.413  1.00 81.64      clus C  
ATOM   3436  CD  GLU A 448     -47.960  53.299   0.740  1.00 88.90      clus C  
ATOM   3437  OE1 GLU A 448     -48.902  52.522   0.485  1.00 93.09      clus O  
ATOM   3438  OE2 GLU A 448     -47.587  53.533   1.915  1.00 94.41      clus O1-
ATOM   3439  N   VAL A 449     -49.240  51.341  -3.687  1.00 62.68      clus N  
ATOM   3440  CA  VAL A 449     -50.104  51.044  -4.828  1.00 60.48      clus C  
ATOM   3441  C   VAL A 449     -51.404  51.837  -4.666  1.00 60.70      clus C  
ATOM   3442  O   VAL A 449     -51.982  51.860  -3.576  1.00 54.71      clus O  
ATOM   3443  CB  VAL A 449     -50.411  49.529  -4.913  1.00 62.47      clus C  
ATOM   3444  CG1 VAL A 449     -50.955  49.024  -3.589  1.00 66.98      clus C  
ATOM   3445  CG2 VAL A 449     -51.400  49.247  -6.028  1.00 63.85      clus C  
ATOM   3446  N   TYR A 450     -51.849  52.493  -5.741  1.00 61.57      clus N  
ATOM   3447  CA  TYR A 450     -53.069  53.295  -5.699  1.00 63.85      clus C  
ATOM   3448  C   TYR A 450     -54.239  52.504  -5.130  1.00 63.45      clus C  
ATOM   3449  O   TYR A 450     -54.637  52.742  -3.984  1.00 65.03      clus O  
ATOM   3450  CB  TYR A 450     -53.364  53.922  -7.061  1.00 70.49      clus C  
ATOM   3451  CG  TYR A 450     -52.373  55.001  -7.418  1.00 79.16      clus C  
ATOM   3452  CD1 TYR A 450     -51.964  55.189  -8.735  1.00 82.12      clus C  
ATOM   3453  CD2 TYR A 450     -51.822  55.823  -6.428  1.00 76.36      clus C  
ATOM   3454  CE1 TYR A 450     -51.030  56.162  -9.067  1.00 82.84      clus C  
ATOM   3455  CE2 TYR A 450     -50.887  56.800  -6.747  1.00 81.63      clus C  
ATOM   3456  CZ  TYR A 450     -50.495  56.963  -8.074  1.00 82.40      clus C  
ATOM   3457  OH  TYR A 450     -49.568  57.921  -8.418  1.00 77.80      clus O  
ATOM   3458  N   PRO A 451     -54.833  51.578  -5.910  1.00 60.74      clus N  
ATOM   3459  CA  PRO A 451     -55.927  50.881  -5.218  1.00 59.41      clus C  
ATOM   3460  C   PRO A 451     -55.241  49.868  -4.290  1.00 58.73      clus C  
ATOM   3461  O   PRO A 451     -54.287  49.210  -4.703  1.00 61.87      clus O  
ATOM   3462  CB  PRO A 451     -56.647  50.167  -6.362  1.00 62.06      clus C  
ATOM   3463  CG  PRO A 451     -56.272  50.975  -7.594  1.00 64.79      clus C  
ATOM   3464  CD  PRO A 451     -54.816  51.245  -7.341  1.00 61.29      clus C  
ATOM   3465  N   SER A 452     -55.635  49.808  -3.023  1.00 51.28      clus N  
ATOM   3466  CA  SER A 452     -55.004  48.850  -2.114  1.00 44.30      clus C  
ATOM   3467  C   SER A 452     -55.851  47.610  -2.118  1.00 39.86      clus C  
ATOM   3468  O   SER A 452     -55.361  46.482  -2.122  1.00 37.43      clus O  
ATOM   3469  CB  SER A 452     -54.945  49.410  -0.700  1.00 46.48      clus C  
ATOM   3470  OG  SER A 452     -54.091  50.534  -0.668  1.00 47.91      clus O  
ATOM   3471  N   ILE A 453     -57.149  47.873  -2.152  1.00 35.45      clus N  
ATOM   3472  CA  ILE A 453     -58.190  46.874  -2.159  1.00 30.43      clus C  
ATOM   3473  C   ILE A 453     -58.693  46.768  -3.592  1.00 22.51      clus C  
ATOM   3474  O   ILE A 453     -59.569  47.528  -3.998  1.00 21.29      clus O  
ATOM   3475  CB  ILE A 453     -59.308  47.320  -1.205  1.00 22.67      clus C  
ATOM   3476  CG1 ILE A 453     -58.744  47.413   0.218  1.00 23.70      clus C  
ATOM   3477  CG2 ILE A 453     -60.461  46.358  -1.255  1.00 27.39      clus C  
ATOM   3478  CD1 ILE A 453     -59.626  48.151   1.221  1.00 18.76      clus C  
ATOM   3479  N   LEU A 454     -58.082  45.866  -4.360  1.00 14.80      clus N  
ATOM   3480  CA  LEU A 454     -58.440  45.637  -5.762  1.00 18.93      clus C  
ATOM   3481  C   LEU A 454     -59.844  45.059  -5.928  1.00 30.18      clus C  
ATOM   3482  O   LEU A 454     -60.279  44.208  -5.145  1.00 35.18      clus O  
ATOM   3483  CB  LEU A 454     -57.453  44.680  -6.429  1.00 20.60      clus C  
ATOM   3484  CG  LEU A 454     -55.955  44.871  -6.216  1.00 19.99      clus C  
ATOM   3485  CD1 LEU A 454     -55.189  44.122  -7.292  1.00 14.61      clus C  
ATOM   3486  CD2 LEU A 454     -55.614  46.337  -6.264  1.00 25.94      clus C  
ATOM   3487  N   ASN A 455     -60.517  45.453  -7.005  1.00 32.10      clus N  
ATOM   3488  CA  ASN A 455     -61.877  44.984  -7.247  1.00 25.83      clus C  
ATOM   3489  C   ASN A 455     -62.056  44.054  -8.447  1.00 28.02      clus C  
ATOM   3490  O   ASN A 455     -62.069  44.495  -9.601  1.00 24.95      clus O  
ATOM   3491  CB  ASN A 455     -62.812  46.179  -7.366  1.00 26.92      clus C  
ATOM   3492  CG  ASN A 455     -64.254  45.780  -7.446  1.00 27.91      clus C  
ATOM   3493  ND2 ASN A 455     -65.058  46.277  -6.509  1.00 24.05      clus N  
ATOM   3494  OD1 ASN A 455     -64.653  45.043  -8.346  1.00 24.97      clus O  
ATOM   3495  N   GLN A 456     -62.252  42.777  -8.129  1.00 32.05      clus N  
ATOM   3496  CA  GLN A 456     -62.475  41.691  -9.081  1.00 33.14      clus C  
ATOM   3497  C   GLN A 456     -63.308  42.081 -10.301  1.00 39.03      clus C  
ATOM   3498  O   GLN A 456     -62.866  41.944 -11.451  1.00 32.17      clus O  
ATOM   3499  CB  GLN A 456     -63.225  40.559  -8.367  1.00 28.50      clus C  
ATOM   3500  CG  GLN A 456     -62.376  39.601  -7.602  1.00 24.32      clus C  
ATOM   3501  CD  GLN A 456     -61.682  38.622  -8.512  1.00 31.63      clus C  
ATOM   3502  NE2 GLN A 456     -61.985  37.347  -8.331  1.00 39.90      clus N  
ATOM   3503  OE1 GLN A 456     -60.888  39.002  -9.379  1.00 34.87      clus O  
ATOM   3504  N   ASP A 457     -64.534  42.527 -10.020  1.00 48.40      clus N  
ATOM   3505  CA  ASP A 457     -65.500  42.910 -11.041  1.00 52.20      clus C  
ATOM   3506  C   ASP A 457     -65.423  44.367 -11.500  1.00 55.68      clus C  
ATOM   3507  O   ASP A 457     -66.376  44.880 -12.089  1.00 55.37      clus O  
ATOM   3508  CB  ASP A 457     -66.917  42.597 -10.548  1.00 60.96      clus C  
ATOM   3509  CG  ASP A 457     -67.888  42.321 -11.688  1.00 69.72      clus C  
ATOM   3510  OD1 ASP A 457     -67.921  41.164 -12.176  1.00 63.88      clus O  
ATOM   3511  OD2 ASP A 457     -68.626  43.252 -12.085  1.00 73.25      clus O1-
ATOM   3512  N   ASN A 458     -64.317  45.048 -11.208  1.00 64.62      clus N  
ATOM   3513  CA  ASN A 458     -64.186  46.424 -11.659  1.00 69.52      clus C  
ATOM   3514  C   ASN A 458     -63.314  46.499 -12.913  1.00 70.19      clus C  
ATOM   3515  O   ASN A 458     -62.125  46.226 -12.891  1.00 67.74      clus O  
ATOM   3516  CB  ASN A 458     -63.668  47.366 -10.589  1.00 73.00      clus C  
ATOM   3517  CG  ASN A 458     -64.046  48.812 -10.881  1.00 81.63      clus C  
ATOM   3518  ND2 ASN A 458     -63.512  49.743 -10.103  1.00 87.55      clus N  
ATOM   3519  OD1 ASN A 458     -64.784  49.100 -11.827  1.00 86.10      clus O  
ATOM   3520  N   LYS A 459     -63.965  46.910 -13.995  1.00 73.10      clus N  
ATOM   3521  CA  LYS A 459     -63.412  47.040 -15.342  1.00 71.55      clus C  
ATOM   3522  C   LYS A 459     -62.499  48.241 -15.671  1.00 66.37      clus C  
ATOM   3523  O   LYS A 459     -62.153  48.416 -16.838  1.00 67.22      clus O  
ATOM   3524  CB  LYS A 459     -64.561  47.146 -16.330  1.00 79.21      clus C  
ATOM   3525  CG  LYS A 459     -65.994  47.001 -15.782  1.00 81.14      clus C  
ATOM   3526  CD  LYS A 459     -67.033  47.798 -16.567  1.00 83.54      clus C  
ATOM   3527  CE  LYS A 459     -66.940  47.575 -18.084  1.00 85.13      clus C  
ATOM   3528  NZ  LYS A 459     -68.172  48.046 -18.795  1.00 84.63      clus N1+
ATOM   3529  N   THR A 460     -61.987  49.002 -14.713  1.00 61.04      clus N  
ATOM   3530  CA  THR A 460     -61.288  50.192 -15.155  1.00 53.82      clus C  
ATOM   3531  C   THR A 460     -60.268  50.370 -16.278  1.00 48.77      clus C  
ATOM   3532  O   THR A 460     -60.250  51.410 -16.892  1.00 42.48      clus O  
ATOM   3533  CB  THR A 460     -61.102  51.223 -14.068  1.00 56.21      clus C  
ATOM   3534  CG2 THR A 460     -62.417  51.960 -13.894  1.00 54.11      clus C  
ATOM   3535  OG1 THR A 460     -60.646  50.621 -12.848  1.00 60.20      clus O  
ATOM   3536  N   CYS A 461     -59.460  49.387 -16.627  1.00 53.85      clus N  
ATOM   3537  CA  CYS A 461     -58.510  49.656 -17.713  1.00 59.09      clus C  
ATOM   3538  C   CYS A 461     -58.358  48.685 -18.880  1.00 52.72      clus C  
ATOM   3539  O   CYS A 461     -58.432  47.472 -18.724  1.00 45.18      clus O  
ATOM   3540  CB  CYS A 461     -57.146  50.163 -17.183  1.00 68.85      clus C  
ATOM   3541  SG  CYS A 461     -56.034  48.963 -16.404  1.00 84.61      clus S  
ATOM   3542  N   SER A 462     -58.075  49.261 -20.046  1.00 53.83      clus N  
ATOM   3543  CA  SER A 462     -57.900  48.507 -21.278  1.00 59.91      clus C  
ATOM   3544  C   SER A 462     -56.649  47.658 -21.389  1.00 59.18      clus C  
ATOM   3545  O   SER A 462     -55.544  48.174 -21.467  1.00 62.71      clus O  
ATOM   3546  CB  SER A 462     -57.989  49.426 -22.485  1.00 67.82      clus C  
ATOM   3547  OG  SER A 462     -59.329  49.580 -22.931  1.00 75.90      clus O  
ATOM   3548  N   LEU A 463     -56.863  46.357 -21.531  1.00 57.52      clus N  
ATOM   3549  CA  LEU A 463     -55.781  45.412 -21.662  1.00 61.94      clus C  
ATOM   3550  C   LEU A 463     -55.064  45.652 -22.986  1.00 66.97      clus C  
ATOM   3551  O   LEU A 463     -55.699  45.927 -23.996  1.00 68.22      clus O  
ATOM   3552  CB  LEU A 463     -56.333  43.984 -21.590  1.00 62.64      clus C  
ATOM   3553  CG  LEU A 463     -55.376  42.822 -21.289  1.00 66.00      clus C  
ATOM   3554  CD1 LEU A 463     -56.075  41.779 -20.434  1.00 65.62      clus C  
ATOM   3555  CD2 LEU A 463     -54.851  42.212 -22.578  1.00 71.12      clus C  
ATOM   3556  N   PRO A 464     -53.721  45.578 -22.985  1.00 75.94      clus N  
ATOM   3557  CA  PRO A 464     -52.870  45.784 -24.162  1.00 78.54      clus C  
ATOM   3558  C   PRO A 464     -53.182  44.880 -25.350  1.00 80.79      clus C  
ATOM   3559  O   PRO A 464     -53.639  45.365 -26.387  1.00 82.92      clus O  
ATOM   3560  CB  PRO A 464     -51.460  45.537 -23.615  1.00 82.29      clus C  
ATOM   3561  CG  PRO A 464     -51.694  44.584 -22.487  1.00 83.95      clus C  
ATOM   3562  CD  PRO A 464     -52.894  45.204 -21.825  1.00 81.92      clus C  
ATOM   3563  N   GLY A 465     -52.933  43.579 -25.198  1.00 78.22      clus N  
ATOM   3564  CA  GLY A 465     -53.195  42.630 -26.271  1.00 78.01      clus C  
ATOM   3565  C   GLY A 465     -54.566  42.776 -26.921  1.00 76.21      clus C  
ATOM   3566  O   GLY A 465     -54.661  42.966 -28.134  1.00 75.86      clus O  
ATOM   3567  N   THR A 466     -55.623  42.688 -26.115  1.00 74.99      clus N  
ATOM   3568  CA  THR A 466     -56.996  42.828 -26.597  1.00 72.98      clus C  
ATOM   3569  C   THR A 466     -57.656  43.901 -25.739  1.00 68.93      clus C  
ATOM   3570  O   THR A 466     -57.499  43.894 -24.518  1.00 65.42      clus O  
ATOM   3571  CB  THR A 466     -57.798  41.508 -26.439  1.00 74.95      clus C  
ATOM   3572  CG2 THR A 466     -59.012  41.514 -27.358  1.00 75.47      clus C  
ATOM   3573  OG1 THR A 466     -56.968  40.384 -26.768  1.00 75.60      clus O  
ATOM   3574  N   ALA A 467     -58.387  44.818 -26.366  1.00 72.46      clus N  
ATOM   3575  CA  ALA A 467     -59.053  45.899 -25.632  1.00 73.09      clus C  
ATOM   3576  C   ALA A 467     -60.188  45.416 -24.717  1.00 75.37      clus C  
ATOM   3577  O   ALA A 467     -61.364  45.390 -25.098  1.00 70.88      clus O  
ATOM   3578  CB  ALA A 467     -59.545  46.979 -26.594  1.00 74.05      clus C  
ATOM   3579  N   LEU A 468     -59.802  45.042 -23.499  1.00 71.12      clus N  
ATOM   3580  CA  LEU A 468     -60.722  44.544 -22.481  1.00 65.39      clus C  
ATOM   3581  C   LEU A 468     -60.569  45.406 -21.242  1.00 65.37      clus C  
ATOM   3582  O   LEU A 468     -59.535  46.030 -21.033  1.00 67.93      clus O  
ATOM   3583  CB  LEU A 468     -60.375  43.097 -22.125  1.00 59.91      clus C  
ATOM   3584  CG  LEU A 468     -60.118  42.176 -23.318  1.00 55.59      clus C  
ATOM   3585  CD1 LEU A 468     -59.517  40.861 -22.871  1.00 57.12      clus C  
ATOM   3586  CD2 LEU A 468     -61.403  41.957 -24.072  1.00 57.04      clus C  
ATOM   3587  N   LYS A 469     -61.591  45.411 -20.403  1.00 65.65      clus N  
ATOM   3588  CA  LYS A 469     -61.570  46.199 -19.186  1.00 72.26      clus C  
ATOM   3589  C   LYS A 469     -61.286  45.312 -17.963  1.00 71.19      clus C  
ATOM   3590  O   LYS A 469     -62.209  44.774 -17.346  1.00 72.52      clus O  
ATOM   3591  CB  LYS A 469     -62.907  46.936 -19.036  1.00 75.46      clus C  
ATOM   3592  CG  LYS A 469     -63.152  48.096 -20.005  1.00 81.46      clus C  
ATOM   3593  CD  LYS A 469     -63.413  47.605 -21.419  1.00 88.16      clus C  
ATOM   3594  CE  LYS A 469     -64.579  46.618 -21.464  1.00 89.15      clus C  
ATOM   3595  NZ  LYS A 469     -64.722  45.980 -22.807  1.00 83.30      clus N1+
ATOM   3596  N   VAL A 470     -60.009  45.168 -17.613  1.00 67.48      clus N  
ATOM   3597  CA  VAL A 470     -59.606  44.336 -16.473  1.00 66.42      clus C  
ATOM   3598  C   VAL A 470     -59.455  45.142 -15.167  1.00 62.36      clus C  
ATOM   3599  O   VAL A 470     -59.265  46.357 -15.213  1.00 63.86      clus O  
ATOM   3600  CB  VAL A 470     -58.310  43.525 -16.825  1.00 64.46      clus C  
ATOM   3601  CG1 VAL A 470     -57.178  44.460 -17.210  1.00 62.96      clus C  
ATOM   3602  CG2 VAL A 470     -57.911  42.585 -15.687  1.00 65.73      clus C  
ATOM   3603  N   SER A 471     -59.603  44.474 -14.016  1.00 60.77      clus N  
ATOM   3604  CA  SER A 471     -59.483  45.121 -12.702  1.00 58.43      clus C  
ATOM   3605  C   SER A 471     -58.130  45.800 -12.550  1.00 60.49      clus C  
ATOM   3606  O   SER A 471     -57.109  45.164 -12.277  1.00 53.89      clus O  
ATOM   3607  CB  SER A 471     -59.708  44.127 -11.577  1.00 53.42      clus C  
ATOM   3608  OG  SER A 471     -59.663  44.789 -10.331  1.00 49.17      clus O  
ATOM   3609  N   CYS A 472     -58.162  47.122 -12.674  1.00 66.56      clus N  
ATOM   3610  CA  CYS A 472     -56.964  47.960 -12.644  1.00 64.48      clus C  
ATOM   3611  C   CYS A 472     -56.470  48.485 -11.302  1.00 61.52      clus C  
ATOM   3612  O   CYS A 472     -57.253  48.807 -10.409  1.00 60.87      clus O  
ATOM   3613  CB  CYS A 472     -57.187  49.137 -13.581  1.00 69.72      clus C  
ATOM   3614  SG  CYS A 472     -55.733  49.705 -14.471  1.00 84.81      clus S  
ATOM   3615  N   PHE A 473     -55.149  48.548 -11.181  1.00 56.11      clus N  
ATOM   3616  CA  PHE A 473     -54.486  49.105 -10.007  1.00 50.35      clus C  
ATOM   3617  C   PHE A 473     -53.105  49.585 -10.420  1.00 50.03      clus C  
ATOM   3618  O   PHE A 473     -52.493  49.022 -11.329  1.00 43.51      clus O  
ATOM   3619  CB  PHE A 473     -54.443  48.141  -8.808  1.00 50.54      clus C  
ATOM   3620  CG  PHE A 473     -53.447  47.022  -8.926  1.00 49.56      clus C  
ATOM   3621  CD1 PHE A 473     -52.233  47.090  -8.257  1.00 45.97      clus C  
ATOM   3622  CD2 PHE A 473     -53.751  45.868  -9.643  1.00 50.45      clus C  
ATOM   3623  CE1 PHE A 473     -51.340  46.030  -8.294  1.00 49.71      clus C  
ATOM   3624  CE2 PHE A 473     -52.863  44.797  -9.690  1.00 45.59      clus C  
ATOM   3625  CZ  PHE A 473     -51.657  44.876  -9.014  1.00 49.25      clus C  
ATOM   3626  N   ASN A 474     -52.672  50.697  -9.844  1.00 54.51      clus N  
ATOM   3627  CA  ASN A 474     -51.374  51.237 -10.197  1.00 61.18      clus C  
ATOM   3628  C   ASN A 474     -50.415  51.265  -9.025  1.00 62.81      clus C  
ATOM   3629  O   ASN A 474     -50.831  51.422  -7.879  1.00 59.87      clus O  
ATOM   3630  CB  ASN A 474     -51.524  52.613 -10.834  1.00 64.94      clus C  
ATOM   3631  CG  ASN A 474     -52.010  52.534 -12.269  1.00 74.79      clus C  
ATOM   3632  ND2 ASN A 474     -53.322  52.634 -12.467  1.00 73.32      clus N  
ATOM   3633  OD1 ASN A 474     -51.212  52.374 -13.188  1.00 81.90      clus O  
ATOM   3634  N   VAL A 475     -49.128  51.117  -9.336  1.00 60.99      clus N  
ATOM   3635  CA  VAL A 475     -48.071  51.073  -8.329  1.00 56.58      clus C  
ATOM   3636  C   VAL A 475     -46.859  51.982  -8.604  1.00 58.92      clus C  
ATOM   3637  O   VAL A 475     -46.170  51.841  -9.620  1.00 58.45      clus O  
ATOM   3638  CB  VAL A 475     -47.597  49.610  -8.139  1.00 53.36      clus C  
ATOM   3639  CG1 VAL A 475     -47.247  48.983  -9.488  1.00 43.84      clus C  
ATOM   3640  CG2 VAL A 475     -46.414  49.551  -7.192  1.00 56.23      clus C  
ATOM   3641  N   ARG A 476     -46.596  52.897  -7.673  1.00 57.09      clus N  
ATOM   3642  CA  ARG A 476     -45.469  53.819  -7.796  1.00 55.73      clus C  
ATOM   3643  C   ARG A 476     -44.382  53.512  -6.771  1.00 52.58      clus C  
ATOM   3644  O   ARG A 476     -44.650  53.051  -5.656  1.00 50.12      clus O  
ATOM   3645  CB  ARG A 476     -45.936  55.275  -7.665  1.00 58.27      clus C  
ATOM   3646  CG  ARG A 476     -46.314  55.719  -6.251  1.00 61.46      clus C  
ATOM   3647  CD  ARG A 476     -47.001  57.087  -6.265  1.00 64.30      clus C  
ATOM   3648  NE  ARG A 476     -46.409  57.988  -7.258  1.00 73.94      clus N  
ATOM   3649  CZ  ARG A 476     -46.870  59.203  -7.554  1.00 79.61      clus C  
ATOM   3650  NH1 ARG A 476     -47.941  59.687  -6.927  1.00 85.02      clus N1+
ATOM   3651  NH2 ARG A 476     -46.277  59.924  -8.502  1.00 80.20      clus N  
ATOM   3652  N   PHE A 477     -43.149  53.805  -7.148  1.00 50.12      clus N  
ATOM   3653  CA  PHE A 477     -42.031  53.535  -6.280  1.00 49.83      clus C  
ATOM   3654  C   PHE A 477     -41.018  54.657  -6.272  1.00 48.70      clus C  
ATOM   3655  O   PHE A 477     -40.139  54.711  -7.124  1.00 46.36      clus O  
ATOM   3656  CB  PHE A 477     -41.373  52.218  -6.687  1.00 49.03      clus C  
ATOM   3657  CG  PHE A 477     -41.143  52.079  -8.164  1.00 44.47      clus C  
ATOM   3658  CD1 PHE A 477     -39.858  51.946  -8.665  1.00 49.39      clus C  
ATOM   3659  CD2 PHE A 477     -42.209  52.039  -9.049  1.00 44.85      clus C  
ATOM   3660  CE1 PHE A 477     -39.638  51.770 -10.029  1.00 50.86      clus C  
ATOM   3661  CE2 PHE A 477     -41.999  51.864 -10.407  1.00 51.11      clus C  
ATOM   3662  CZ  PHE A 477     -40.708  51.728 -10.898  1.00 48.51      clus C  
ATOM   3663  N   CYS A 478     -41.152  55.560  -5.308  1.00 53.60      clus N  
ATOM   3664  CA  CYS A 478     -40.232  56.682  -5.181  1.00 61.51      clus C  
ATOM   3665  C   CYS A 478     -38.940  56.248  -4.503  1.00 62.32      clus C  
ATOM   3666  O   CYS A 478     -38.897  55.201  -3.855  1.00 58.80      clus O  
ATOM   3667  CB  CYS A 478     -40.873  57.816  -4.389  1.00 70.65      clus C  
ATOM   3668  SG  CYS A 478     -42.206  58.722  -5.248  1.00 86.17      clus S  
ATOM   3669  N   LEU A 479     -37.899  57.073  -4.621  1.00 64.75      clus N  
ATOM   3670  CA  LEU A 479     -36.607  56.742  -4.029  1.00 59.13      clus C  
ATOM   3671  C   LEU A 479     -35.667  57.941  -3.847  1.00 56.69      clus C  
ATOM   3672  O   LEU A 479     -35.178  58.501  -4.828  1.00 50.93      clus O  
ATOM   3673  CB  LEU A 479     -35.919  55.678  -4.897  1.00 53.11      clus C  
ATOM   3674  CG  LEU A 479     -34.763  54.865  -4.313  1.00 48.61      clus C  
ATOM   3675  CD1 LEU A 479     -35.267  53.968  -3.201  1.00 42.81      clus C  
ATOM   3676  CD2 LEU A 479     -34.140  54.034  -5.410  1.00 47.21      clus C  
ATOM   3677  N   LYS A 480     -35.395  58.301  -2.590  1.00 59.31      clus N  
ATOM   3678  CA  LYS A 480     -34.489  59.410  -2.270  1.00 62.23      clus C  
ATOM   3679  C   LYS A 480     -33.184  58.895  -1.656  1.00 62.27      clus C  
ATOM   3680  O   LYS A 480     -33.198  57.992  -0.819  1.00 59.70      clus O  
ATOM   3681  CB  LYS A 480     -35.146  60.399  -1.296  1.00 66.44      clus C  
ATOM   3682  CG  LYS A 480     -34.929  60.094   0.185  1.00 65.55      clus C  
ATOM   3683  CD  LYS A 480     -35.673  61.063   1.085  1.00 69.82      clus C  
ATOM   3684  CE  LYS A 480     -35.356  60.793   2.544  1.00 75.72      clus C  
ATOM   3685  NZ  LYS A 480     -36.223  61.574   3.465  1.00 79.84      clus N1+
ATOM   3686  N   ALA A 481     -32.064  59.489  -2.050  1.00 62.16      clus N  
ATOM   3687  CA  ALA A 481     -30.769  59.078  -1.525  1.00 63.95      clus C  
ATOM   3688  C   ALA A 481     -29.998  60.277  -1.023  1.00 65.60      clus C  
ATOM   3689  O   ALA A 481     -30.029  61.340  -1.634  1.00 66.97      clus O  
ATOM   3690  CB  ALA A 481     -29.976  58.369  -2.593  1.00 67.18      clus C  
ATOM   3691  N   ASP A 482     -29.284  60.098   0.076  1.00 65.62      clus N  
ATOM   3692  CA  ASP A 482     -28.511  61.191   0.631  1.00 69.44      clus C  
ATOM   3693  C   ASP A 482     -27.088  60.792   0.985  1.00 65.83      clus C  
ATOM   3694  O   ASP A 482     -26.871  59.828   1.723  1.00 66.67      clus O  
ATOM   3695  CB  ASP A 482     -29.208  61.757   1.860  1.00 75.86      clus C  
ATOM   3696  CG  ASP A 482     -28.429  62.886   2.484  1.00 81.81      clus C  
ATOM   3697  OD1 ASP A 482     -28.221  62.840   3.714  1.00 87.99      clus O  
ATOM   3698  OD2 ASP A 482     -28.003  63.799   1.738  1.00 83.28      clus O1-
ATOM   3699  N   GLY A 483     -26.127  61.561   0.480  1.00 64.54      clus N  
ATOM   3700  CA  GLY A 483     -24.725  61.283   0.751  1.00 57.21      clus C  
ATOM   3701  C   GLY A 483     -24.119  62.117   1.873  1.00 52.43      clus C  
ATOM   3702  O   GLY A 483     -24.824  62.846   2.575  1.00 51.99      clus O  
ATOM   3703  N   LYS A 484     -22.802  62.009   2.035  1.00 47.49      clus N  
ATOM   3704  CA  LYS A 484     -22.050  62.736   3.067  1.00 40.11      clus C  
ATOM   3705  C   LYS A 484     -20.564  62.674   2.678  1.00 34.82      clus C  
ATOM   3706  O   LYS A 484     -19.936  61.620   2.757  1.00 33.78      clus O  
ATOM   3707  CB  LYS A 484     -22.281  62.093   4.439  1.00 34.15      clus C  
ATOM   3708  CG  LYS A 484     -21.603  62.795   5.596  1.00 33.21      clus C  
ATOM   3709  CD  LYS A 484     -22.116  64.215   5.771  1.00 36.81      clus C  
ATOM   3710  CE  LYS A 484     -22.519  64.507   7.222  1.00 35.55      clus C  
ATOM   3711  NZ  LYS A 484     -23.772  63.793   7.646  1.00 33.82      clus N1+
ATOM   3712  N   GLY A 485     -20.017  63.800   2.227  1.00 32.79      clus N  
ATOM   3713  CA  GLY A 485     -18.630  63.831   1.790  1.00 35.58      clus C  
ATOM   3714  C   GLY A 485     -18.574  63.934   0.270  1.00 37.36      clus C  
ATOM   3715  O   GLY A 485     -19.415  64.609  -0.327  1.00 37.08      clus O  
ATOM   3716  N   VAL A 486     -17.628  63.230  -0.361  1.00 35.95      clus N  
ATOM   3717  CA  VAL A 486     -17.455  63.268  -1.833  1.00 39.46      clus C  
ATOM   3718  C   VAL A 486     -18.123  62.090  -2.570  1.00 48.98      clus C  
ATOM   3719  O   VAL A 486     -17.593  60.971  -2.520  1.00 54.59      clus O  
ATOM   3720  CB  VAL A 486     -15.962  63.273  -2.219  1.00 38.56      clus C  
ATOM   3721  CG1 VAL A 486     -15.796  63.414  -3.719  1.00 44.85      clus C  
ATOM   3722  CG2 VAL A 486     -15.234  64.394  -1.509  1.00 42.39      clus C  
ATOM   3723  N   LEU A 487     -19.210  62.355  -3.322  1.00 53.15      clus N  
ATOM   3724  CA  LEU A 487     -19.947  61.297  -4.042  1.00 58.84      clus C  
ATOM   3725  C   LEU A 487     -21.210  61.684  -4.840  1.00 62.91      clus C  
ATOM   3726  O   LEU A 487     -21.361  61.292  -6.003  1.00 60.70      clus O  
ATOM   3727  CB  LEU A 487     -20.335  60.159  -3.062  1.00 57.65      clus C  
ATOM   3728  CG  LEU A 487     -21.433  60.235  -2.009  1.00 58.23      clus C  
ATOM   3729  CD1 LEU A 487     -21.563  58.879  -1.379  1.00 61.04      clus C  
ATOM   3730  CD2 LEU A 487     -21.204  61.248  -0.881  1.00 58.31      clus C  
ATOM   3731  N   PRO A 488     -22.092  62.498  -4.256  1.00 67.89      clus N  
ATOM   3732  CA  PRO A 488     -23.342  62.956  -4.816  1.00 64.93      clus C  
ATOM   3733  C   PRO A 488     -23.862  62.886  -6.231  1.00 66.31      clus C  
ATOM   3734  O   PRO A 488     -24.208  61.800  -6.755  1.00 60.48      clus O  
ATOM   3735  CB  PRO A 488     -23.428  64.358  -4.264  1.00 62.94      clus C  
ATOM   3736  CG  PRO A 488     -23.129  64.151  -2.877  1.00 59.50      clus C  
ATOM   3737  CD  PRO A 488     -21.811  63.386  -3.118  1.00 66.52      clus C  
ATOM   3738  N   ARG A 489     -23.881  64.069  -6.861  1.00 73.47      clus N  
ATOM   3739  CA  ARG A 489     -24.464  64.290  -8.154  1.00 75.73      clus C  
ATOM   3740  C   ARG A 489     -24.961  63.146  -9.078  1.00 75.68      clus C  
ATOM   3741  O   ARG A 489     -26.149  63.070  -9.333  1.00 70.19      clus O  
ATOM   3742  CB  ARG A 489     -24.091  65.670  -8.736  1.00 77.57      clus C  
ATOM   3743  CG  ARG A 489     -23.393  66.718  -7.705  1.00 83.72      clus C  
ATOM   3744  CD  ARG A 489     -24.105  67.206  -6.317  1.00 86.90      clus C  
ATOM   3745  NE  ARG A 489     -23.087  67.758  -5.358  1.00 86.88      clus N  
ATOM   3746  CZ  ARG A 489     -23.214  68.838  -4.546  1.00 86.00      clus C  
ATOM   3747  NH1 ARG A 489     -24.337  69.559  -4.511  1.00 81.84      clus N1+
ATOM   3748  NH2 ARG A 489     -22.187  69.250  -3.780  1.00 83.74      clus N  
ATOM   3749  N   LYS A 490     -24.168  62.122  -9.392  1.00 77.49      clus N  
ATOM   3750  CA  LYS A 490     -24.694  60.985 -10.243  1.00 81.31      clus C  
ATOM   3751  C   LYS A 490     -25.152  59.644  -9.590  1.00 78.55      clus C  
ATOM   3752  O   LYS A 490     -24.464  58.631  -9.687  1.00 78.41      clus O  
ATOM   3753  CB  LYS A 490     -23.728  60.656 -11.431  1.00 86.56      clus C  
ATOM   3754  CG  LYS A 490     -22.373  60.052 -11.036  1.00 88.67      clus C  
ATOM   3755  CD  LYS A 490     -21.641  59.460 -12.257  1.00 89.78      clus C  
ATOM   3756  CE  LYS A 490     -22.335  58.221 -12.841  1.00 88.55      clus C  
ATOM   3757  NZ  LYS A 490     -22.359  57.062 -11.903  1.00 90.28      clus N1+
ATOM   3758  N   LEU A 491     -26.348  59.596  -9.008  1.00 75.50      clus N  
ATOM   3759  CA  LEU A 491     -26.828  58.345  -8.378  1.00 72.48      clus C  
ATOM   3760  C   LEU A 491     -27.663  57.369  -9.204  1.00 74.47      clus C  
ATOM   3761  O   LEU A 491     -28.883  57.439  -9.209  1.00 72.03      clus O  
ATOM   3762  CB  LEU A 491     -27.514  58.615  -7.040  1.00 69.49      clus C  
ATOM   3763  CG  LEU A 491     -26.577  58.932  -5.868  1.00 65.54      clus C  
ATOM   3764  CD1 LEU A 491     -27.355  59.034  -4.579  1.00 55.60      clus C  
ATOM   3765  CD2 LEU A 491     -25.519  57.859  -5.760  1.00 59.84      clus C  
ATOM   3766  N   ASN A 492     -26.980  56.388  -9.792  1.00 75.16      clus N  
ATOM   3767  CA  ASN A 492     -27.599  55.356 -10.629  1.00 73.74      clus C  
ATOM   3768  C   ASN A 492     -28.105  54.135  -9.833  1.00 73.26      clus C  
ATOM   3769  O   ASN A 492     -27.332  53.465  -9.144  1.00 76.04      clus O  
ATOM   3770  CB  ASN A 492     -26.599  54.903 -11.708  1.00 76.60      clus C  
ATOM   3771  CG  ASN A 492     -25.190  54.639 -11.145  1.00 82.52      clus C  
ATOM   3772  ND2 ASN A 492     -24.189  54.676 -12.020  1.00 81.58      clus N  
ATOM   3773  OD1 ASN A 492     -25.011  54.400  -9.942  1.00 84.98      clus O  
ATOM   3774  N   PHE A 493     -29.398  53.836  -9.941  1.00 72.55      clus N  
ATOM   3775  CA  PHE A 493     -29.976  52.698  -9.226  1.00 70.04      clus C  
ATOM   3776  C   PHE A 493     -30.505  51.567 -10.104  1.00 69.13      clus C  
ATOM   3777  O   PHE A 493     -30.489  51.652 -11.331  1.00 68.18      clus O  
ATOM   3778  CB  PHE A 493     -31.058  53.169  -8.262  1.00 65.27      clus C  
ATOM   3779  CG  PHE A 493     -30.518  53.716  -6.973  1.00 61.32      clus C  
ATOM   3780  CD1 PHE A 493     -29.760  54.881  -6.953  1.00 57.41      clus C  
ATOM   3781  CD2 PHE A 493     -30.777  53.070  -5.768  1.00 62.35      clus C  
ATOM   3782  CE1 PHE A 493     -29.273  55.393  -5.749  1.00 52.83      clus C  
ATOM   3783  CE2 PHE A 493     -30.292  53.578  -4.559  1.00 57.69      clus C  
ATOM   3784  CZ  PHE A 493     -29.542  54.738  -4.552  1.00 52.69      clus C  
ATOM   3785  N   GLN A 494     -30.983  50.508  -9.456  1.00 67.84      clus N  
ATOM   3786  CA  GLN A 494     -31.498  49.337 -10.150  1.00 68.75      clus C  
ATOM   3787  C   GLN A 494     -32.676  48.716  -9.416  1.00 70.23      clus C  
ATOM   3788  O   GLN A 494     -32.616  47.558  -9.003  1.00 72.59      clus O  
ATOM   3789  CB  GLN A 494     -30.390  48.294 -10.286  1.00 70.31      clus C  
ATOM   3790  CG  GLN A 494     -29.392  48.550 -11.397  1.00 77.32      clus C  
ATOM   3791  CD  GLN A 494     -29.895  48.081 -12.750  1.00 84.00      clus C  
ATOM   3792  NE2 GLN A 494     -31.208  48.171 -12.954  1.00 88.15      clus N  
ATOM   3793  OE1 GLN A 494     -29.116  47.630 -13.601  1.00 80.58      clus O  
ATOM   3794  N   VAL A 495     -33.754  49.478  -9.268  1.00 67.25      clus N  
ATOM   3795  CA  VAL A 495     -34.951  48.996  -8.580  1.00 64.06      clus C  
ATOM   3796  C   VAL A 495     -35.726  47.908  -9.356  1.00 62.53      clus C  
ATOM   3797  O   VAL A 495     -35.717  47.874 -10.585  1.00 60.26      clus O  
ATOM   3798  CB  VAL A 495     -35.850  50.194  -8.141  1.00 64.04      clus C  
ATOM   3799  CG1 VAL A 495     -35.936  51.225  -9.246  1.00 66.43      clus C  
ATOM   3800  CG2 VAL A 495     -37.244  49.720  -7.712  1.00 67.15      clus C  
ATOM   3801  N   GLU A 496     -36.369  47.010  -8.612  1.00 58.19      clus N  
ATOM   3802  CA  GLU A 496     -37.120  45.888  -9.171  1.00 53.06      clus C  
ATOM   3803  C   GLU A 496     -38.437  45.632  -8.412  1.00 49.65      clus C  
ATOM   3804  O   GLU A 496     -38.437  45.513  -7.179  1.00 44.65      clus O  
ATOM   3805  CB  GLU A 496     -36.225  44.646  -9.107  1.00 57.11      clus C  
ATOM   3806  CG  GLU A 496     -36.923  43.322  -9.299  1.00 65.47      clus C  
ATOM   3807  CD  GLU A 496     -37.411  43.134 -10.709  1.00 74.98      clus C  
ATOM   3808  OE1 GLU A 496     -38.643  43.159 -10.920  1.00 77.53      clus O  
ATOM   3809  OE2 GLU A 496     -36.561  42.953 -11.607  1.00 77.11      clus O1-
ATOM   3810  N   LEU A 497     -39.547  45.529  -9.155  1.00 49.71      clus N  
ATOM   3811  CA  LEU A 497     -40.878  45.284  -8.567  1.00 51.62      clus C  
ATOM   3812  C   LEU A 497     -41.421  43.855  -8.783  1.00 48.35      clus C  
ATOM   3813  O   LEU A 497     -41.370  43.323  -9.899  1.00 47.44      clus O  
ATOM   3814  CB  LEU A 497     -41.904  46.302  -9.086  1.00 49.28      clus C  
ATOM   3815  CG  LEU A 497     -41.650  47.785  -8.824  1.00 51.93      clus C  
ATOM   3816  CD1 LEU A 497     -40.683  48.312  -9.866  1.00 51.06      clus C  
ATOM   3817  CD2 LEU A 497     -42.956  48.557  -8.885  1.00 48.45      clus C  
ATOM   3818  N   LEU A 498     -41.942  43.252  -7.709  1.00 45.81      clus N  
ATOM   3819  CA  LEU A 498     -42.506  41.902  -7.752  1.00 44.59      clus C  
ATOM   3820  C   LEU A 498     -43.946  41.883  -7.272  1.00 45.43      clus C  
ATOM   3821  O   LEU A 498     -44.238  42.284  -6.143  1.00 37.77      clus O  
ATOM   3822  CB  LEU A 498     -41.692  40.942  -6.897  1.00 48.73      clus C  
ATOM   3823  CG  LEU A 498     -40.233  40.714  -7.292  1.00 53.46      clus C  
ATOM   3824  CD1 LEU A 498     -39.618  39.734  -6.307  1.00 57.02      clus C  
ATOM   3825  CD2 LEU A 498     -40.125  40.188  -8.722  1.00 46.83      clus C  
ATOM   3826  N   LEU A 499     -44.823  41.348  -8.121  1.00 45.00      clus N  
ATOM   3827  CA  LEU A 499     -46.257  41.268  -7.852  1.00 48.29      clus C  
ATOM   3828  C   LEU A 499     -46.703  39.918  -7.311  1.00 50.10      clus C  
ATOM   3829  O   LEU A 499     -46.445  38.879  -7.929  1.00 50.50      clus O  
ATOM   3830  CB  LEU A 499     -47.013  41.565  -9.136  1.00 46.15      clus C  
ATOM   3831  CG  LEU A 499     -46.592  42.877  -9.779  1.00 42.94      clus C  
ATOM   3832  CD1 LEU A 499     -47.148  42.962 -11.177  1.00 44.83      clus C  
ATOM   3833  CD2 LEU A 499     -47.079  44.020  -8.926  1.00 41.22      clus C  
ATOM   3834  N   ASP A 500     -47.436  39.954  -6.199  1.00 53.35      clus N  
ATOM   3835  CA  ASP A 500     -47.930  38.750  -5.527  1.00 59.53      clus C  
ATOM   3836  C   ASP A 500     -46.771  37.763  -5.353  1.00 59.00      clus C  
ATOM   3837  O   ASP A 500     -46.629  36.803  -6.122  1.00 55.86      clus O  
ATOM   3838  CB  ASP A 500     -49.080  38.111  -6.321  1.00 61.82      clus C  
ATOM   3839  CG  ASP A 500     -49.870  37.096  -5.500  1.00 62.30      clus C  
ATOM   3840  OD1 ASP A 500     -50.542  36.250  -6.124  1.00 56.60      clus O  
ATOM   3841  OD2 ASP A 500     -49.825  37.149  -4.243  1.00 57.97      clus O1-
ATOM   3842  N   LYS A 501     -45.934  38.031  -4.354  1.00 61.50      clus N  
ATOM   3843  CA  LYS A 501     -44.760  37.209  -4.093  1.00 65.53      clus C  
ATOM   3844  C   LYS A 501     -45.000  36.044  -3.144  1.00 67.62      clus C  
ATOM   3845  O   LYS A 501     -44.144  35.165  -3.014  1.00 71.80      clus O  
ATOM   3846  CB  LYS A 501     -43.588  38.078  -3.616  1.00 68.32      clus C  
ATOM   3847  CG  LYS A 501     -42.224  37.381  -3.668  1.00 73.21      clus C  
ATOM   3848  CD  LYS A 501     -41.964  36.722  -5.031  1.00 72.59      clus C  
ATOM   3849  CE  LYS A 501     -40.684  35.884  -5.014  1.00 70.74      clus C  
ATOM   3850  NZ  LYS A 501     -40.419  35.159  -6.296  1.00 72.28      clus N1+
ATOM   3851  N   LEU A 502     -46.156  36.019  -2.485  1.00 65.94      clus N  
ATOM   3852  CA  LEU A 502     -46.461  34.906  -1.587  1.00 67.48      clus C  
ATOM   3853  C   LEU A 502     -46.541  33.622  -2.403  1.00 68.75      clus C  
ATOM   3854  O   LEU A 502     -46.546  32.522  -1.854  1.00 71.81      clus O  
ATOM   3855  CB  LEU A 502     -47.771  35.143  -0.844  1.00 61.96      clus C  
ATOM   3856  CG  LEU A 502     -47.663  36.230   0.215  1.00 59.35      clus C  
ATOM   3857  CD1 LEU A 502     -48.937  36.290   1.045  1.00 55.46      clus C  
ATOM   3858  CD2 LEU A 502     -46.461  35.915   1.087  1.00 55.35      clus C  
ATOM   3859  N   LYS A 503     -46.607  33.792  -3.720  1.00 64.28      clus N  
ATOM   3860  CA  LYS A 503     -46.663  32.691  -4.661  1.00 64.41      clus C  
ATOM   3861  C   LYS A 503     -45.233  32.310  -5.058  1.00 72.68      clus C  
ATOM   3862  O   LYS A 503     -44.623  32.944  -5.923  1.00 72.91      clus O  
ATOM   3863  CB  LYS A 503     -47.461  33.090  -5.908  1.00 61.56      clus C  
ATOM   3864  CG  LYS A 503     -48.857  33.611  -5.628  1.00 58.87      clus C  
ATOM   3865  CD  LYS A 503     -49.640  32.669  -4.730  1.00 56.13      clus C  
ATOM   3866  CE  LYS A 503     -51.020  33.215  -4.429  1.00 53.47      clus C  
ATOM   3867  NZ  LYS A 503     -51.746  32.419  -3.404  1.00 49.71      clus N1+
ATOM   3868  N   GLN A 504     -44.714  31.266  -4.418  1.00 79.18      clus N  
ATOM   3869  CA  GLN A 504     -43.362  30.769  -4.669  1.00 84.04      clus C  
ATOM   3870  C   GLN A 504     -43.179  30.264  -6.111  1.00 82.69      clus C  
ATOM   3871  O   GLN A 504     -43.229  31.043  -7.073  1.00 77.69      clus O  
ATOM   3872  CB  GLN A 504     -43.048  29.648  -3.663  1.00 86.26      clus C  
ATOM   3873  CG  GLN A 504     -43.268  30.046  -2.201  1.00 93.83      clus C  
ATOM   3874  CD  GLN A 504     -43.041  28.904  -1.212  1.00 99.38      clus C  
ATOM   3875  NE2 GLN A 504     -42.026  28.078  -1.474  1.00 98.98      clus N  
ATOM   3876  OE1 GLN A 504     -43.767  28.774  -0.216  1.00 99.78      clus O  
ATOM   3877  N   LYS A 505     -42.932  28.964  -6.243  1.00 83.31      clus N  
ATOM   3878  CA  LYS A 505     -42.751  28.322  -7.538  1.00 87.14      clus C  
ATOM   3879  C   LYS A 505     -44.111  27.925  -8.125  1.00 88.61      clus C  
ATOM   3880  O   LYS A 505     -44.218  27.619  -9.316  1.00 89.57      clus O  
ATOM   3881  CB  LYS A 505     -41.857  27.090  -7.371  1.00 84.19      clus C  
ATOM   3882  CG  LYS A 505     -40.389  27.411  -7.154  1.00 81.33      clus C  
ATOM   3883  CD  LYS A 505     -39.726  27.773  -8.468  1.00 82.72      clus C  
ATOM   3884  CE  LYS A 505     -39.773  26.587  -9.424  1.00 81.85      clus C  
ATOM   3885  NZ  LYS A 505     -39.157  26.880 -10.742  1.00 79.01      clus N1+
ATOM   3886  N   GLY A 506     -45.147  27.974  -7.282  1.00 89.78      clus N  
ATOM   3887  CA  GLY A 506     -46.504  27.625  -7.682  1.00 90.22      clus C  
ATOM   3888  C   GLY A 506     -47.095  28.446  -8.817  1.00 92.10      clus C  
ATOM   3889  O   GLY A 506     -48.165  28.116  -9.324  1.00 94.49      clus O  
ATOM   3890  N   ALA A 507     -46.414  29.536  -9.175  1.00 94.71      clus N  
ATOM   3891  CA  ALA A 507     -46.798  30.441 -10.266  1.00 93.00      clus C  
ATOM   3892  C   ALA A 507     -48.245  30.946 -10.336  1.00 92.39      clus C  
ATOM   3893  O   ALA A 507     -48.774  31.197 -11.425  1.00 91.41      clus O  
ATOM   3894  CB  ALA A 507     -46.377  29.848 -11.611  1.00 93.78      clus C  
ATOM   3895  N   ILE A 508     -48.882  31.110  -9.183  1.00 89.00      clus N  
ATOM   3896  CA  ILE A 508     -50.248  31.619  -9.150  1.00 85.77      clus C  
ATOM   3897  C   ILE A 508     -50.147  33.141  -9.039  1.00 84.12      clus C  
ATOM   3898  O   ILE A 508     -50.899  33.777  -8.299  1.00 85.33      clus O  
ATOM   3899  CB  ILE A 508     -51.027  31.041  -7.953  1.00 89.86      clus C  
ATOM   3900  CG1 ILE A 508     -50.820  29.525  -7.896  1.00 93.44      clus C  
ATOM   3901  CG2 ILE A 508     -52.519  31.359  -8.080  1.00 86.14      clus C  
ATOM   3902  CD1 ILE A 508     -51.418  28.856  -6.679  1.00 97.24      clus C  
ATOM   3903  N   ARG A 509     -49.168  33.706  -9.751  1.00 73.68      clus N  
ATOM   3904  CA  ARG A 509     -48.920  35.142  -9.766  1.00 61.55      clus C  
ATOM   3905  C   ARG A 509     -50.220  35.748 -10.191  1.00 53.97      clus C  
ATOM   3906  O   ARG A 509     -50.515  35.839 -11.374  1.00 54.04      clus O  
ATOM   3907  CB  ARG A 509     -47.843  35.491 -10.787  1.00 66.94      clus C  
ATOM   3908  CG  ARG A 509     -46.515  34.784 -10.572  1.00 73.65      clus C  
ATOM   3909  CD  ARG A 509     -45.790  35.294  -9.346  1.00 76.57      clus C  
ATOM   3910  NE  ARG A 509     -44.548  34.560  -9.138  1.00 81.34      clus N  
ATOM   3911  CZ  ARG A 509     -43.816  34.626  -8.031  1.00 80.95      clus C  
ATOM   3912  NH1 ARG A 509     -44.195  35.403  -7.025  1.00 78.80      clus N1+
ATOM   3913  NH2 ARG A 509     -42.730  33.875  -7.909  1.00 75.12      clus N  
ATOM   3914  N   ARG A 510     -51.015  36.102  -9.196  1.00 44.48      clus N  
ATOM   3915  CA  ARG A 510     -52.326  36.667  -9.414  1.00 31.80      clus C  
ATOM   3916  C   ARG A 510     -52.336  38.044 -10.038  1.00 28.00      clus C  
ATOM   3917  O   ARG A 510     -53.274  38.381 -10.745  1.00 25.49      clus O  
ATOM   3918  CB  ARG A 510     -53.108  36.642  -8.108  1.00 32.68      clus C  
ATOM   3919  CG  ARG A 510     -53.588  35.243  -7.731  1.00 25.62      clus C  
ATOM   3920  CD  ARG A 510     -53.423  34.998  -6.261  1.00 18.04      clus C  
ATOM   3921  NE  ARG A 510     -53.868  36.140  -5.482  1.00 25.03      clus N  
ATOM   3922  CZ  ARG A 510     -53.748  36.245  -4.165  1.00 26.42      clus C  
ATOM   3923  NH1 ARG A 510     -53.188  35.270  -3.466  1.00 31.61      clus N1+
ATOM   3924  NH2 ARG A 510     -54.218  37.316  -3.538  1.00 25.84      clus N  
ATOM   3925  N   ALA A 511     -51.300  38.837  -9.781  1.00 29.76      clus N  
ATOM   3926  CA  ALA A 511     -51.204  40.184 -10.354  1.00 27.16      clus C  
ATOM   3927  C   ALA A 511     -50.158  40.192 -11.467  1.00 28.96      clus C  
ATOM   3928  O   ALA A 511     -49.152  39.480 -11.387  1.00 21.79      clus O  
ATOM   3929  CB  ALA A 511     -50.847  41.212  -9.270  1.00 27.98      clus C  
ATOM   3930  N   LEU A 512     -50.400  40.979 -12.509  1.00 36.50      clus N  
ATOM   3931  CA  LEU A 512     -49.460  41.049 -13.627  1.00 43.19      clus C  
ATOM   3932  C   LEU A 512     -49.283  42.458 -14.183  1.00 44.44      clus C  
ATOM   3933  O   LEU A 512     -50.165  43.299 -14.054  1.00 42.14      clus O  
ATOM   3934  CB  LEU A 512     -49.903  40.108 -14.755  1.00 47.30      clus C  
ATOM   3935  CG  LEU A 512     -50.032  38.603 -14.501  1.00 46.81      clus C  
ATOM   3936  CD1 LEU A 512     -50.479  37.952 -15.791  1.00 46.38      clus C  
ATOM   3937  CD2 LEU A 512     -48.711  37.995 -14.029  1.00 44.07      clus C  
ATOM   3938  N   PHE A 513     -48.141  42.704 -14.818  1.00 49.49      clus N  
ATOM   3939  CA  PHE A 513     -47.860  44.016 -15.394  1.00 57.33      clus C  
ATOM   3940  C   PHE A 513     -48.442  44.211 -16.796  1.00 62.21      clus C  
ATOM   3941  O   PHE A 513     -48.289  43.356 -17.675  1.00 63.86      clus O  
ATOM   3942  CB  PHE A 513     -46.354  44.300 -15.395  1.00 60.73      clus C  
ATOM   3943  CG  PHE A 513     -45.831  44.830 -14.080  1.00 62.05      clus C  
ATOM   3944  CD1 PHE A 513     -44.783  44.188 -13.416  1.00 61.46      clus C  
ATOM   3945  CD2 PHE A 513     -46.372  45.987 -13.516  1.00 56.06      clus C  
ATOM   3946  CE1 PHE A 513     -44.283  44.691 -12.216  1.00 57.61      clus C  
ATOM   3947  CE2 PHE A 513     -45.877  46.491 -12.320  1.00 52.93      clus C  
ATOM   3948  CZ  PHE A 513     -44.834  45.843 -11.672  1.00 56.67      clus C  
ATOM   3949  N   LEU A 514     -49.065  45.375 -16.990  1.00 62.31      clus N  
ATOM   3950  CA  LEU A 514     -49.728  45.790 -18.232  1.00 59.38      clus C  
ATOM   3951  C   LEU A 514     -48.991  45.511 -19.547  1.00 61.98      clus C  
ATOM   3952  O   LEU A 514     -49.105  44.428 -20.116  1.00 58.17      clus O  
ATOM   3953  CB  LEU A 514     -50.066  47.290 -18.138  1.00 59.51      clus C  
ATOM   3954  CG  LEU A 514     -51.271  47.951 -18.819  1.00 57.89      clus C  
ATOM   3955  CD1 LEU A 514     -51.229  47.761 -20.323  1.00 61.73      clus C  
ATOM   3956  CD2 LEU A 514     -52.562  47.405 -18.242  1.00 66.16      clus C  
ATOM   3957  N   TYR A 515     -48.231  46.496 -20.013  1.00 66.51      clus N  
ATOM   3958  CA  TYR A 515     -47.507  46.412 -21.277  1.00 70.11      clus C  
ATOM   3959  C   TYR A 515     -46.601  45.200 -21.505  1.00 69.37      clus C  
ATOM   3960  O   TYR A 515     -46.049  45.017 -22.591  1.00 62.29      clus O  
ATOM   3961  CB  TYR A 515     -46.769  47.727 -21.513  1.00 74.15      clus C  
ATOM   3962  CG  TYR A 515     -47.716  48.907 -21.493  1.00 78.03      clus C  
ATOM   3963  CD1 TYR A 515     -47.897  49.664 -20.333  1.00 80.54      clus C  
ATOM   3964  CD2 TYR A 515     -48.467  49.245 -22.622  1.00 82.14      clus C  
ATOM   3965  CE1 TYR A 515     -48.806  50.730 -20.293  1.00 82.24      clus C  
ATOM   3966  CE2 TYR A 515     -49.378  50.311 -22.597  1.00 85.12      clus C  
ATOM   3967  CZ  TYR A 515     -49.545  51.048 -21.426  1.00 83.55      clus C  
ATOM   3968  OH  TYR A 515     -50.455  52.089 -21.384  1.00 77.87      clus O  
ATOM   3969  N   SER A 516     -46.479  44.360 -20.487  1.00 72.07      clus N  
ATOM   3970  CA  SER A 516     -45.680  43.148 -20.572  1.00 77.97      clus C  
ATOM   3971  C   SER A 516     -46.226  42.223 -19.513  1.00 80.57      clus C  
ATOM   3972  O   SER A 516     -45.712  42.191 -18.395  1.00 78.65      clus O  
ATOM   3973  CB  SER A 516     -44.206  43.439 -20.301  1.00 84.04      clus C  
ATOM   3974  OG  SER A 516     -43.469  42.231 -20.233  1.00 84.85      clus O  
ATOM   3975  N   ARG A 517     -47.297  41.512 -19.862  1.00 81.29      clus N  
ATOM   3976  CA  ARG A 517     -47.968  40.586 -18.950  1.00 82.81      clus C  
ATOM   3977  C   ARG A 517     -46.967  39.753 -18.166  1.00 81.04      clus C  
ATOM   3978  O   ARG A 517     -46.581  38.663 -18.595  1.00 82.53      clus O  
ATOM   3979  CB  ARG A 517     -48.920  39.650 -19.709  1.00 86.44      clus C  
ATOM   3980  CG  ARG A 517     -50.137  40.307 -20.348  1.00 89.00      clus C  
ATOM   3981  CD  ARG A 517     -49.772  41.054 -21.620  1.00 89.63      clus C  
ATOM   3982  NE  ARG A 517     -50.923  41.221 -22.503  1.00 96.44      clus N  
ATOM   3983  CZ  ARG A 517     -51.427  40.253 -23.265  1.00 95.43      clus C  
ATOM   3984  NH1 ARG A 517     -50.884  39.038 -23.255  1.00 96.87      clus N1+
ATOM   3985  NH2 ARG A 517     -52.467  40.502 -24.049  1.00 92.97      clus N  
ATOM   3986  N   SER A 518     -46.538  40.285 -17.024  1.00 76.74      clus N  
ATOM   3987  CA  SER A 518     -45.574  39.607 -16.173  1.00 68.62      clus C  
ATOM   3988  C   SER A 518     -45.597  40.225 -14.793  1.00 64.51      clus C  
ATOM   3989  O   SER A 518     -45.877  41.406 -14.631  1.00 64.34      clus O  
ATOM   3990  CB  SER A 518     -44.163  39.712 -16.762  1.00 66.95      clus C  
ATOM   3991  OG  SER A 518     -43.260  38.868 -16.067  1.00 64.89      clus O  
ATOM   3992  N   PRO A 519     -45.334  39.411 -13.770  1.00 62.82      clus N  
ATOM   3993  CA  PRO A 519     -45.307  39.835 -12.370  1.00 65.18      clus C  
ATOM   3994  C   PRO A 519     -43.904  40.287 -11.961  1.00 65.86      clus C  
ATOM   3995  O   PRO A 519     -43.668  40.633 -10.800  1.00 67.95      clus O  
ATOM   3996  CB  PRO A 519     -45.673  38.552 -11.649  1.00 61.12      clus C  
ATOM   3997  CG  PRO A 519     -44.895  37.533 -12.453  1.00 59.53      clus C  
ATOM   3998  CD  PRO A 519     -45.191  37.949 -13.882  1.00 59.24      clus C  
ATOM   3999  N   SER A 520     -42.978  40.251 -12.918  1.00 66.94      clus N  
ATOM   4000  CA  SER A 520     -41.591  40.627 -12.686  1.00 63.22      clus C  
ATOM   4001  C   SER A 520     -41.098  41.703 -13.648  1.00 62.51      clus C  
ATOM   4002  O   SER A 520     -40.614  41.393 -14.742  1.00 61.46      clus O  
ATOM   4003  CB  SER A 520     -40.686  39.394 -12.811  1.00 64.13      clus C  
ATOM   4004  OG  SER A 520     -41.056  38.373 -11.901  1.00 63.87      clus O  
ATOM   4005  N   HIS A 521     -41.252  42.965 -13.253  1.00 64.53      clus N  
ATOM   4006  CA  HIS A 521     -40.768  44.080 -14.070  1.00 68.38      clus C  
ATOM   4007  C   HIS A 521     -39.666  44.865 -13.350  1.00 68.23      clus C  
ATOM   4008  O   HIS A 521     -39.819  45.246 -12.181  1.00 66.86      clus O  
ATOM   4009  CB  HIS A 521     -41.892  45.042 -14.475  1.00 69.15      clus C  
ATOM   4010  CG  HIS A 521     -41.395  46.340 -15.033  1.00 77.14      clus C  
ATOM   4011  CD2 HIS A 521     -40.947  46.678 -16.267  1.00 79.49      clus C  
ATOM   4012  ND1 HIS A 521     -41.251  47.482 -14.260  1.00 78.51      clus N  
ATOM   4013  CE1 HIS A 521     -40.737  48.448 -14.990  1.00 80.21      clus C  
ATOM   4014  NE2 HIS A 521     -40.541  47.988 -16.217  1.00 85.81      clus N  
ATOM   4015  N   SER A 522     -38.590  45.142 -14.088  1.00 67.09      clus N  
ATOM   4016  CA  SER A 522     -37.427  45.878 -13.590  1.00 66.09      clus C  
ATOM   4017  C   SER A 522     -37.218  47.225 -14.286  1.00 63.09      clus C  
ATOM   4018  O   SER A 522     -37.614  47.412 -15.440  1.00 63.85      clus O  
ATOM   4019  CB  SER A 522     -36.176  45.021 -13.757  1.00 67.69      clus C  
ATOM   4020  OG  SER A 522     -36.211  44.325 -14.994  1.00 76.41      clus O  
ATOM   4021  N   LYS A 523     -36.545  48.141 -13.593  1.00 65.06      clus N  
ATOM   4022  CA  LYS A 523     -36.275  49.474 -14.130  1.00 65.24      clus C  
ATOM   4023  C   LYS A 523     -34.961  50.096 -13.611  1.00 68.43      clus C  
ATOM   4024  O   LYS A 523     -34.405  49.664 -12.595  1.00 69.90      clus O  
ATOM   4025  CB  LYS A 523     -37.457  50.401 -13.817  1.00 63.14      clus C  
ATOM   4026  CG  LYS A 523     -37.410  51.745 -14.522  1.00 63.68      clus C  
ATOM   4027  CD  LYS A 523     -37.512  51.603 -16.038  1.00 64.85      clus C  
ATOM   4028  CE  LYS A 523     -37.533  52.967 -16.719  1.00 61.78      clus C  
ATOM   4029  NZ  LYS A 523     -36.308  53.774 -16.435  1.00 67.12      clus N1+
ATOM   4030  N   ASN A 524     -34.453  51.081 -14.354  1.00 69.53      clus N  
ATOM   4031  CA  ASN A 524     -33.225  51.799 -14.010  1.00 67.19      clus C  
ATOM   4032  C   ASN A 524     -33.655  53.174 -13.491  1.00 68.80      clus C  
ATOM   4033  O   ASN A 524     -34.739  53.646 -13.834  1.00 70.42      clus O  
ATOM   4034  CB  ASN A 524     -32.335  51.974 -15.255  1.00 62.68      clus C  
ATOM   4035  CG  ASN A 524     -32.044  50.654 -15.975  1.00 66.55      clus C  
ATOM   4036  ND2 ASN A 524     -31.225  50.717 -17.027  1.00 68.72      clus N  
ATOM   4037  OD1 ASN A 524     -32.555  49.600 -15.598  1.00 66.73      clus O  
ATOM   4038  N   MET A 525     -32.821  53.821 -12.678  1.00 69.45      clus N  
ATOM   4039  CA  MET A 525     -33.176  55.137 -12.148  1.00 71.72      clus C  
ATOM   4040  C   MET A 525     -31.990  56.002 -11.713  1.00 74.60      clus C  
ATOM   4041  O   MET A 525     -30.847  55.540 -11.705  1.00 74.08      clus O  
ATOM   4042  CB  MET A 525     -34.174  54.990 -10.996  1.00 71.58      clus C  
ATOM   4043  CG  MET A 525     -35.524  55.652 -11.255  1.00 71.21      clus C  
ATOM   4044  SD  MET A 525     -36.702  55.419  -9.900  1.00 67.39      clus S  
ATOM   4045  CE  MET A 525     -36.114  56.610  -8.690  1.00 72.06      clus C  
ATOM   4046  N   THR A 526     -32.277  57.263 -11.369  1.00 78.27      clus N  
ATOM   4047  CA  THR A 526     -31.255  58.224 -10.935  1.00 79.30      clus C  
ATOM   4048  C   THR A 526     -31.811  59.322 -10.013  1.00 76.68      clus C  
ATOM   4049  O   THR A 526     -33.022  59.481  -9.890  1.00 75.63      clus O  
ATOM   4050  CB  THR A 526     -30.572  58.900 -12.141  1.00 74.40      clus C  
ATOM   4051  CG2 THR A 526     -29.193  59.400 -11.750  1.00 74.07      clus C  
ATOM   4052  OG1 THR A 526     -30.420  57.953 -13.205  1.00 75.31      clus O  
ATOM   4053  N   ILE A 527     -30.901  60.049  -9.354  1.00 75.75      clus N  
ATOM   4054  CA  ILE A 527     -31.206  61.154  -8.422  1.00 76.75      clus C  
ATOM   4055  C   ILE A 527     -29.915  61.908  -8.051  1.00 73.90      clus C  
ATOM   4056  O   ILE A 527     -29.011  62.026  -8.874  1.00 73.15      clus O  
ATOM   4057  CB  ILE A 527     -31.883  60.645  -7.112  1.00 78.91      clus C  
ATOM   4058  CG1 ILE A 527     -31.394  59.232  -6.762  1.00 76.96      clus C  
ATOM   4059  CG2 ILE A 527     -33.398  60.747  -7.221  1.00 80.09      clus C  
ATOM   4060  CD1 ILE A 527     -32.001  58.651  -5.505  1.00 72.25      clus C  
ATOM   4061  N   SER A 528     -29.844  62.443  -6.832  1.00 72.35      clus N  
ATOM   4062  CA  SER A 528     -28.641  63.139  -6.376  1.00 75.42      clus C  
ATOM   4063  C   SER A 528     -28.721  63.736  -4.980  1.00 73.18      clus C  
ATOM   4064  O   SER A 528     -28.022  63.302  -4.063  1.00 70.75      clus O  
ATOM   4065  CB  SER A 528     -28.234  64.237  -7.352  1.00 78.94      clus C  
ATOM   4066  OG  SER A 528     -27.062  64.889  -6.895  1.00 80.59      clus O  
ATOM   4067  N   ARG A 529     -29.537  64.773  -4.841  1.00 75.86      clus N  
ATOM   4068  CA  ARG A 529     -29.692  65.456  -3.566  1.00 77.81      clus C  
ATOM   4069  C   ARG A 529     -30.187  64.503  -2.505  1.00 80.20      clus C  
ATOM   4070  O   ARG A 529     -30.680  63.422  -2.813  1.00 83.65      clus O  
ATOM   4071  CB  ARG A 529     -30.700  66.600  -3.671  1.00 84.72      clus C  
ATOM   4072  CG  ARG A 529     -30.617  67.453  -4.928  1.00 94.97      clus C  
ATOM   4073  CD  ARG A 529     -31.542  68.668  -4.793  1.00 99.82      clus C  
ATOM   4074  NE  ARG A 529     -31.828  69.339  -6.058  1.00100.00      clus N  
ATOM   4075  CZ  ARG A 529     -30.912  69.759  -6.925  1.00 98.98      clus C  
ATOM   4076  NH1 ARG A 529     -29.617  69.583  -6.689  1.00 99.42      clus N1+
ATOM   4077  NH2 ARG A 529     -31.295  70.385  -8.027  1.00 95.71      clus N  
ATOM   4078  N   GLY A 530     -30.078  64.936  -1.253  1.00 81.10      clus N  
ATOM   4079  CA  GLY A 530     -30.532  64.132  -0.131  1.00 79.12      clus C  
ATOM   4080  C   GLY A 530     -32.011  64.316   0.171  1.00 78.29      clus C  
ATOM   4081  O   GLY A 530     -32.561  63.657   1.061  1.00 74.95      clus O  
ATOM   4082  N   GLY A 531     -32.638  65.241  -0.552  1.00 77.13      clus N  
ATOM   4083  CA  GLY A 531     -34.053  65.512  -0.386  1.00 80.09      clus C  
ATOM   4084  C   GLY A 531     -34.768  65.298  -1.708  1.00 79.76      clus C  
ATOM   4085  O   GLY A 531     -35.991  65.134  -1.745  1.00 81.71      clus O  
ATOM   4086  N   LEU A 532     -33.994  65.304  -2.793  1.00 80.97      clus N  
ATOM   4087  CA  LEU A 532     -34.512  65.100  -4.148  1.00 81.48      clus C  
ATOM   4088  C   LEU A 532     -34.947  63.638  -4.330  1.00 83.00      clus C  
ATOM   4089  O   LEU A 532     -34.112  62.724  -4.295  1.00 81.01      clus O  
ATOM   4090  CB  LEU A 532     -33.421  65.452  -5.172  1.00 76.65      clus C  
ATOM   4091  CG  LEU A 532     -33.739  65.638  -6.658  1.00 75.33      clus C  
ATOM   4092  CD1 LEU A 532     -34.010  64.309  -7.350  1.00 72.93      clus C  
ATOM   4093  CD2 LEU A 532     -34.915  66.593  -6.795  1.00 73.43      clus C  
ATOM   4094  N   MET A 533     -36.247  63.418  -4.535  1.00 81.34      clus N  
ATOM   4095  CA  MET A 533     -36.754  62.062  -4.712  1.00 78.12      clus C  
ATOM   4096  C   MET A 533     -37.503  61.794  -6.010  1.00 72.70      clus C  
ATOM   4097  O   MET A 533     -38.728  61.881  -6.067  1.00 62.84      clus O  
ATOM   4098  CB  MET A 533     -37.601  61.627  -3.506  1.00 82.76      clus C  
ATOM   4099  CG  MET A 533     -38.898  62.393  -3.279  1.00 86.15      clus C  
ATOM   4100  SD  MET A 533     -39.762  61.845  -1.782  1.00 97.69      clus S  
ATOM   4101  CE  MET A 533     -39.527  60.020  -1.864  1.00 83.08      clus C  
ATOM   4102  N   GLN A 534     -36.749  61.464  -7.056  1.00 74.48      clus N  
ATOM   4103  CA  GLN A 534     -37.333  61.140  -8.351  1.00 76.67      clus C  
ATOM   4104  C   GLN A 534     -38.262  59.942  -8.155  1.00 74.46      clus C  
ATOM   4105  O   GLN A 534     -38.043  59.109  -7.265  1.00 68.05      clus O  
ATOM   4106  CB  GLN A 534     -36.240  60.782  -9.363  1.00 82.02      clus C  
ATOM   4107  CG  GLN A 534     -36.776  60.318 -10.713  1.00 90.77      clus C  
ATOM   4108  CD  GLN A 534     -35.695  59.776 -11.629  1.00 96.91      clus C  
ATOM   4109  NE2 GLN A 534     -34.599  60.518 -11.763  1.00 97.79      clus N  
ATOM   4110  OE1 GLN A 534     -35.851  58.706 -12.221  1.00100.00      clus O  
ATOM   4111  N   CYS A 535     -39.306  59.870  -8.972  1.00 75.50      clus N  
ATOM   4112  CA  CYS A 535     -40.264  58.777  -8.869  1.00 71.26      clus C  
ATOM   4113  C   CYS A 535     -40.635  58.161 -10.212  1.00 69.58      clus C  
ATOM   4114  O   CYS A 535     -40.156  58.584 -11.267  1.00 73.59      clus O  
ATOM   4115  CB  CYS A 535     -41.529  59.241  -8.157  1.00 74.72      clus C  
ATOM   4116  SG  CYS A 535     -42.268  57.941  -7.127  1.00 82.01      clus S  
ATOM   4117  N   GLU A 536     -41.492  57.151 -10.151  1.00 66.60      clus N  
ATOM   4118  CA  GLU A 536     -41.940  56.439 -11.331  1.00 67.04      clus C  
ATOM   4119  C   GLU A 536     -43.117  55.590 -10.896  1.00 67.69      clus C  
ATOM   4120  O   GLU A 536     -43.378  55.436  -9.701  1.00 68.29      clus O  
ATOM   4121  CB  GLU A 536     -40.815  55.546 -11.853  1.00 69.03      clus C  
ATOM   4122  CG  GLU A 536     -41.081  54.877 -13.193  1.00 82.32      clus C  
ATOM   4123  CD  GLU A 536     -39.977  53.905 -13.596  1.00 89.89      clus C  
ATOM   4124  OE1 GLU A 536     -40.291  52.873 -14.233  1.00 92.56      clus O  
ATOM   4125  OE2 GLU A 536     -38.796  54.170 -13.273  1.00 90.69      clus O1-
ATOM   4126  N   GLU A 537     -43.834  55.046 -11.867  1.00 66.70      clus N  
ATOM   4127  CA  GLU A 537     -44.986  54.216 -11.566  1.00 65.76      clus C  
ATOM   4128  C   GLU A 537     -45.335  53.287 -12.709  1.00 61.08      clus C  
ATOM   4129  O   GLU A 537     -44.910  53.488 -13.847  1.00 58.68      clus O  
ATOM   4130  CB  GLU A 537     -46.181  55.090 -11.225  1.00 68.21      clus C  
ATOM   4131  CG  GLU A 537     -46.471  56.142 -12.266  1.00 72.82      clus C  
ATOM   4132  CD  GLU A 537     -47.638  57.018 -11.887  1.00 78.84      clus C  
ATOM   4133  OE1 GLU A 537     -48.220  57.634 -12.808  1.00 80.04      clus O  
ATOM   4134  OE2 GLU A 537     -47.973  57.093 -10.681  1.00 80.06      clus O1-
ATOM   4135  N   LEU A 538     -46.127  52.273 -12.390  1.00 56.32      clus N  
ATOM   4136  CA  LEU A 538     -46.537  51.283 -13.365  1.00 54.09      clus C  
ATOM   4137  C   LEU A 538     -48.005  50.918 -13.213  1.00 56.91      clus C  
ATOM   4138  O   LEU A 538     -48.659  51.293 -12.235  1.00 50.78      clus O  
ATOM   4139  CB  LEU A 538     -45.678  50.032 -13.211  1.00 54.20      clus C  
ATOM   4140  CG  LEU A 538     -44.192  50.171 -13.531  1.00 48.42      clus C  
ATOM   4141  CD1 LEU A 538     -43.410  49.091 -12.818  1.00 48.93      clus C  
ATOM   4142  CD2 LEU A 538     -43.981  50.092 -15.024  1.00 48.04      clus C  
ATOM   4143  N   ILE A 539     -48.504  50.173 -14.197  1.00 57.48      clus N  
ATOM   4144  CA  ILE A 539     -49.892  49.723 -14.232  1.00 58.36      clus C  
ATOM   4145  C   ILE A 539     -49.908  48.206 -14.208  1.00 55.95      clus C  
ATOM   4146  O   ILE A 539     -49.373  47.557 -15.106  1.00 55.85      clus O  
ATOM   4147  CB  ILE A 539     -50.617  50.170 -15.509  1.00 55.88      clus C  
ATOM   4148  CG1 ILE A 539     -49.937  51.400 -16.117  1.00 60.44      clus C  
ATOM   4149  CG2 ILE A 539     -52.067  50.461 -15.193  1.00 50.60      clus C  
ATOM   4150  CD1 ILE A 539     -48.620  51.099 -16.841  1.00 59.19      clus C  
ATOM   4151  N   ALA A 540     -50.492  47.649 -13.154  1.00 47.89      clus N  
ATOM   4152  CA  ALA A 540     -50.582  46.208 -12.995  1.00 42.22      clus C  
ATOM   4153  C   ALA A 540     -52.049  45.818 -12.928  1.00 44.99      clus C  
ATOM   4154  O   ALA A 540     -52.878  46.550 -12.388  1.00 46.32      clus O  
ATOM   4155  CB  ALA A 540     -49.855  45.773 -11.739  1.00 39.82      clus C  
ATOM   4156  N   TYR A 541     -52.381  44.687 -13.537  1.00 45.89      clus N  
ATOM   4157  CA  TYR A 541     -53.754  44.216 -13.539  1.00 45.22      clus C  
ATOM   4158  C   TYR A 541     -53.903  42.929 -12.726  1.00 42.14      clus C  
ATOM   4159  O   TYR A 541     -52.918  42.329 -12.264  1.00 41.60      clus O  
ATOM   4160  CB  TYR A 541     -54.268  44.026 -14.978  1.00 49.12      clus C  
ATOM   4161  CG  TYR A 541     -53.822  42.752 -15.674  1.00 61.17      clus C  
ATOM   4162  CD1 TYR A 541     -52.668  42.724 -16.458  1.00 66.44      clus C  
ATOM   4163  CD2 TYR A 541     -54.560  41.570 -15.554  1.00 66.51      clus C  
ATOM   4164  CE1 TYR A 541     -52.260  41.548 -17.107  1.00 71.58      clus C  
ATOM   4165  CE2 TYR A 541     -54.162  40.393 -16.193  1.00 74.05      clus C  
ATOM   4166  CZ  TYR A 541     -53.014  40.391 -16.967  1.00 73.50      clus C  
ATOM   4167  OH  TYR A 541     -52.625  39.237 -17.603  1.00 73.75      clus O  
ATOM   4168  N   LEU A 542     -55.158  42.527 -12.568  1.00 38.35      clus N  
ATOM   4169  CA  LEU A 542     -55.558  41.340 -11.827  1.00 31.70      clus C  
ATOM   4170  C   LEU A 542     -56.214  40.431 -12.875  1.00 30.49      clus C  
ATOM   4171  O   LEU A 542     -57.305  40.729 -13.376  1.00 30.59      clus O  
ATOM   4172  CB  LEU A 542     -56.566  41.775 -10.746  1.00 26.91      clus C  
ATOM   4173  CG  LEU A 542     -57.025  40.956  -9.536  1.00 27.37      clus C  
ATOM   4174  CD1 LEU A 542     -55.828  40.562  -8.689  1.00 29.00      clus C  
ATOM   4175  CD2 LEU A 542     -58.053  41.770  -8.712  1.00 20.97      clus C  
ATOM   4176  N   ARG A 543     -55.510  39.373 -13.272  1.00 30.09      clus N  
ATOM   4177  CA  ARG A 543     -56.046  38.445 -14.262  1.00 37.23      clus C  
ATOM   4178  C   ARG A 543     -57.457  38.019 -13.888  1.00 40.29      clus C  
ATOM   4179  O   ARG A 543     -57.836  38.035 -12.717  1.00 37.23      clus O  
ATOM   4180  CB  ARG A 543     -55.133  37.226 -14.459  1.00 35.97      clus C  
ATOM   4181  CG  ARG A 543     -54.632  36.545 -13.180  1.00 40.07      clus C  
ATOM   4182  CD  ARG A 543     -54.004  35.170 -13.462  1.00 37.83      clus C  
ATOM   4183  NE  ARG A 543     -53.124  35.167 -14.636  1.00 37.34      clus N  
ATOM   4184  CZ  ARG A 543     -51.854  34.754 -14.644  1.00 40.49      clus C  
ATOM   4185  NH1 ARG A 543     -51.274  34.299 -13.535  1.00 43.13      clus N1+
ATOM   4186  NH2 ARG A 543     -51.155  34.796 -15.772  1.00 41.27      clus N  
ATOM   4187  N   ASP A 544     -58.242  37.686 -14.900  1.00 44.23      clus N  
ATOM   4188  CA  ASP A 544     -59.628  37.292 -14.710  1.00 45.02      clus C  
ATOM   4189  C   ASP A 544     -59.866  36.250 -13.608  1.00 45.17      clus C  
ATOM   4190  O   ASP A 544     -59.191  35.219 -13.540  1.00 40.74      clus O  
ATOM   4191  CB  ASP A 544     -60.201  36.804 -16.040  1.00 47.83      clus C  
ATOM   4192  CG  ASP A 544     -61.708  36.748 -16.039  1.00 49.59      clus C  
ATOM   4193  OD1 ASP A 544     -62.264  35.898 -16.765  1.00 45.21      clus O  
ATOM   4194  OD2 ASP A 544     -62.338  37.556 -15.322  1.00 53.27      clus O1-
ATOM   4195  N   GLU A 545     -60.843  36.542 -12.756  1.00 48.27      clus N  
ATOM   4196  CA  GLU A 545     -61.230  35.675 -11.644  1.00 54.95      clus C  
ATOM   4197  C   GLU A 545     -61.346  34.216 -12.034  1.00 53.13      clus C  
ATOM   4198  O   GLU A 545     -61.069  33.326 -11.242  1.00 52.14      clus O  
ATOM   4199  CB  GLU A 545     -62.570  36.139 -11.059  1.00 59.76      clus C  
ATOM   4200  CG  GLU A 545     -63.638  36.528 -12.092  1.00 66.73      clus C  
ATOM   4201  CD  GLU A 545     -63.529  37.977 -12.590  1.00 70.10      clus C  
ATOM   4202  OE1 GLU A 545     -62.422  38.568 -12.580  1.00 66.92      clus O  
ATOM   4203  OE2 GLU A 545     -64.566  38.528 -13.011  1.00 71.82      clus O1-
ATOM   4204  N   SER A 546     -61.736  33.995 -13.280  1.00 58.23      clus N  
ATOM   4205  CA  SER A 546     -61.931  32.661 -13.829  1.00 60.54      clus C  
ATOM   4206  C   SER A 546     -60.674  31.811 -13.985  1.00 62.58      clus C  
ATOM   4207  O   SER A 546     -60.774  30.617 -14.261  1.00 61.91      clus O  
ATOM   4208  CB  SER A 546     -62.627  32.764 -15.187  1.00 61.67      clus C  
ATOM   4209  OG  SER A 546     -61.721  33.191 -16.190  1.00 61.48      clus O  
ATOM   4210  N   GLU A 547     -59.496  32.410 -13.828  1.00 65.17      clus N  
ATOM   4211  CA  GLU A 547     -58.260  31.647 -13.989  1.00 58.86      clus C  
ATOM   4212  C   GLU A 547     -57.440  31.416 -12.730  1.00 54.16      clus C  
ATOM   4213  O   GLU A 547     -56.300  30.976 -12.808  1.00 49.46      clus O  
ATOM   4214  CB  GLU A 547     -57.391  32.257 -15.089  1.00 61.67      clus C  
ATOM   4215  CG  GLU A 547     -57.071  33.719 -14.899  1.00 70.48      clus C  
ATOM   4216  CD  GLU A 547     -56.708  34.397 -16.203  1.00 77.94      clus C  
ATOM   4217  OE1 GLU A 547     -57.317  35.443 -16.514  1.00 77.92      clus O  
ATOM   4218  OE2 GLU A 547     -55.822  33.881 -16.922  1.00 84.24      clus O1-
ATOM   4219  N   PHE A 548     -58.028  31.679 -11.570  1.00 49.67      clus N  
ATOM   4220  CA  PHE A 548     -57.328  31.471 -10.308  1.00 47.85      clus C  
ATOM   4221  C   PHE A 548     -58.294  31.554  -9.118  1.00 53.17      clus C  
ATOM   4222  O   PHE A 548     -59.415  32.052  -9.249  1.00 51.46      clus O  
ATOM   4223  CB  PHE A 548     -56.192  32.494 -10.150  1.00 40.13      clus C  
ATOM   4224  CG  PHE A 548     -56.672  33.896  -9.946  1.00 32.23      clus C  
ATOM   4225  CD1 PHE A 548     -56.973  34.361  -8.660  1.00 28.32      clus C  
ATOM   4226  CD2 PHE A 548     -56.877  34.734 -11.031  1.00 25.76      clus C  
ATOM   4227  CE1 PHE A 548     -57.481  35.635  -8.455  1.00 16.11      clus C  
ATOM   4228  CE2 PHE A 548     -57.383  36.015 -10.842  1.00 27.06      clus C  
ATOM   4229  CZ  PHE A 548     -57.690  36.468  -9.550  1.00 25.53      clus C  
ATOM   4230  N   ARG A 549     -57.840  31.067  -7.963  1.00 58.69      clus N  
ATOM   4231  CA  ARG A 549     -58.624  31.080  -6.731  1.00 62.15      clus C  
ATOM   4232  C   ARG A 549     -57.719  31.674  -5.656  1.00 64.17      clus C  
ATOM   4233  O   ARG A 549     -56.497  31.685  -5.827  1.00 67.66      clus O  
ATOM   4234  CB  ARG A 549     -59.006  29.652  -6.348  1.00 65.43      clus C  
ATOM   4235  CG  ARG A 549     -60.227  29.544  -5.460  1.00 70.12      clus C  
ATOM   4236  CD  ARG A 549     -61.466  29.213  -6.274  1.00 82.55      clus C  
ATOM   4237  NE  ARG A 549     -61.777  30.231  -7.279  1.00 90.46      clus N  
ATOM   4238  CZ  ARG A 549     -61.918  29.993  -8.582  1.00 92.04      clus C  
ATOM   4239  NH1 ARG A 549     -61.769  28.763  -9.061  1.00 87.40      clus N1+
ATOM   4240  NH2 ARG A 549     -62.224  30.989  -9.409  1.00 91.07      clus N  
ATOM   4241  N   ASP A 550     -58.298  32.147  -4.550  1.00 65.87      clus N  
ATOM   4242  CA  ASP A 550     -57.486  32.743  -3.486  1.00 71.70      clus C  
ATOM   4243  C   ASP A 550     -58.122  32.866  -2.106  1.00 79.43      clus C  
ATOM   4244  O   ASP A 550     -57.476  32.534  -1.110  1.00 82.16      clus O  
ATOM   4245  CB  ASP A 550     -57.012  34.129  -3.905  1.00 70.35      clus C  
ATOM   4246  CG  ASP A 550     -58.164  35.066  -4.177  1.00 75.56      clus C  
ATOM   4247  OD1 ASP A 550     -58.513  35.868  -3.282  1.00 70.59      clus O  
ATOM   4248  OD2 ASP A 550     -58.744  34.972  -5.279  1.00 79.69      clus O1-
ATOM   4249  N   LYS A 551     -59.358  33.382  -2.048  1.00 80.71      clus N  
ATOM   4250  CA  LYS A 551     -60.092  33.617  -0.782  1.00 81.15      clus C  
ATOM   4251  C   LYS A 551     -59.293  34.612   0.087  1.00 80.16      clus C  
ATOM   4252  O   LYS A 551     -59.421  34.696   1.324  1.00 72.06      clus O  
ATOM   4253  CB  LYS A 551     -60.376  32.295  -0.048  1.00 80.29      clus C  
ATOM   4254  CG  LYS A 551     -61.857  31.878  -0.053  1.00 74.27      clus C  
ATOM   4255  CD  LYS A 551     -62.454  31.804  -1.460  1.00 76.61      clus C  
ATOM   4256  CE  LYS A 551     -61.941  30.604  -2.251  1.00 82.58      clus C  
ATOM   4257  NZ  LYS A 551     -60.476  30.654  -2.547  1.00 81.29      clus N1+
ATOM   4258  N   LEU A 552     -58.537  35.417  -0.650  1.00 73.25      clus N  
ATOM   4259  CA  LEU A 552     -57.635  36.442  -0.169  1.00 72.30      clus C  
ATOM   4260  C   LEU A 552     -56.466  35.988   0.683  1.00 61.27      clus C  
ATOM   4261  O   LEU A 552     -56.602  35.493   1.798  1.00 54.46      clus O  
ATOM   4262  CB  LEU A 552     -58.353  37.656   0.439  1.00 78.00      clus C  
ATOM   4263  CG  LEU A 552     -57.519  38.961   0.402  1.00 76.78      clus C  
ATOM   4264  CD1 LEU A 552     -56.573  39.067   1.583  1.00 76.54      clus C  
ATOM   4265  CD2 LEU A 552     -56.732  39.066  -0.905  1.00 70.51      clus C  
ATOM   4266  N   THR A 553     -55.313  36.161   0.061  1.00 55.83      clus N  
ATOM   4267  CA  THR A 553     -53.997  35.884   0.578  1.00 51.85      clus C  
ATOM   4268  C   THR A 553     -53.432  37.130  -0.071  1.00 49.52      clus C  
ATOM   4269  O   THR A 553     -53.265  37.173  -1.284  1.00 53.78      clus O  
ATOM   4270  CB  THR A 553     -53.381  34.677  -0.117  1.00 51.72      clus C  
ATOM   4271  CG2 THR A 553     -52.228  34.149   0.696  1.00 50.49      clus C  
ATOM   4272  OG1 THR A 553     -54.373  33.657  -0.282  1.00 58.89      clus O  
ATOM   4273  N   PRO A 554     -53.197  38.181   0.711  1.00 42.33      clus N  
ATOM   4274  CA  PRO A 554     -52.670  39.454   0.220  1.00 35.09      clus C  
ATOM   4275  C   PRO A 554     -51.751  39.382  -0.996  1.00 30.07      clus C  
ATOM   4276  O   PRO A 554     -50.904  38.486  -1.097  1.00 25.02      clus O  
ATOM   4277  CB  PRO A 554     -51.938  39.995   1.436  1.00 33.72      clus C  
ATOM   4278  CG  PRO A 554     -52.785  39.527   2.540  1.00 39.60      clus C  
ATOM   4279  CD  PRO A 554     -53.064  38.100   2.174  1.00 45.61      clus C  
ATOM   4280  N   ILE A 555     -51.992  40.264  -1.963  1.00 27.98      clus N  
ATOM   4281  CA  ILE A 555     -51.138  40.333  -3.144  1.00 28.38      clus C  
ATOM   4282  C   ILE A 555     -50.087  41.343  -2.697  1.00 25.50      clus C  
ATOM   4283  O   ILE A 555     -50.370  42.533  -2.593  1.00 27.61      clus O  
ATOM   4284  CB  ILE A 555     -51.894  40.848  -4.386  1.00 30.66      clus C  
ATOM   4285  CG1 ILE A 555     -53.095  39.942  -4.662  1.00 23.39      clus C  
ATOM   4286  CG2 ILE A 555     -50.954  40.872  -5.605  1.00 28.75      clus C  
ATOM   4287  CD1 ILE A 555     -53.992  40.408  -5.782  1.00 22.22      clus C  
ATOM   4288  N   THR A 556     -48.909  40.834  -2.341  1.00 25.35      clus N  
ATOM   4289  CA  THR A 556     -47.803  41.642  -1.833  1.00 19.23      clus C  
ATOM   4290  C   THR A 556     -46.839  42.076  -2.917  1.00 20.75      clus C  
ATOM   4291  O   THR A 556     -46.284  41.235  -3.628  1.00 19.47      clus O  
ATOM   4292  CB  THR A 556     -46.996  40.856  -0.790  1.00 18.57      clus C  
ATOM   4293  CG2 THR A 556     -47.828  40.614   0.491  1.00  2.86      clus C  
ATOM   4294  OG1 THR A 556     -46.598  39.601  -1.364  1.00 30.97      clus O  
ATOM   4295  N   ILE A 557     -46.640  43.391  -3.030  1.00 23.63      clus N  
ATOM   4296  CA  ILE A 557     -45.730  43.955  -4.020  1.00 21.21      clus C  
ATOM   4297  C   ILE A 557     -44.378  44.145  -3.352  1.00 23.53      clus C  
ATOM   4298  O   ILE A 557     -44.275  44.753  -2.285  1.00 16.08      clus O  
ATOM   4299  CB  ILE A 557     -46.246  45.290  -4.602  1.00 18.61      clus C  
ATOM   4300  CG1 ILE A 557     -47.589  45.086  -5.304  1.00 13.95      clus C  
ATOM   4301  CG2 ILE A 557     -45.238  45.854  -5.597  1.00 24.82      clus C  
ATOM   4302  CD1 ILE A 557     -48.764  45.119  -4.376  1.00 10.42      clus C  
ATOM   4303  N   PHE A 558     -43.344  43.618  -3.994  1.00 26.80      clus N  
ATOM   4304  CA  PHE A 558     -42.007  43.675  -3.439  1.00 34.29      clus C  
ATOM   4305  C   PHE A 558     -41.041  44.527  -4.225  1.00 35.96      clus C  
ATOM   4306  O   PHE A 558     -40.683  44.213  -5.359  1.00 32.08      clus O  
ATOM   4307  CB  PHE A 558     -41.472  42.256  -3.317  1.00 39.40      clus C  
ATOM   4308  CG  PHE A 558     -40.063  42.167  -2.823  1.00 35.66      clus C  
ATOM   4309  CD1 PHE A 558     -39.788  42.233  -1.460  1.00 33.47      clus C  
ATOM   4310  CD2 PHE A 558     -39.017  41.924  -3.716  1.00 30.31      clus C  
ATOM   4311  CE1 PHE A 558     -38.489  42.048  -0.993  1.00 35.39      clus C  
ATOM   4312  CE2 PHE A 558     -37.721  41.738  -3.262  1.00 29.21      clus C  
ATOM   4313  CZ  PHE A 558     -37.456  41.798  -1.899  1.00 34.78      clus C  
ATOM   4314  N   MET A 559     -40.577  45.584  -3.579  1.00 38.98      clus N  
ATOM   4315  CA  MET A 559     -39.635  46.485  -4.199  1.00 41.54      clus C  
ATOM   4316  C   MET A 559     -38.251  46.339  -3.602  1.00 42.32      clus C  
ATOM   4317  O   MET A 559     -38.050  46.572  -2.410  1.00 39.06      clus O  
ATOM   4318  CB  MET A 559     -40.094  47.930  -4.040  1.00 41.11      clus C  
ATOM   4319  CG  MET A 559     -39.194  48.925  -4.756  1.00 37.04      clus C  
ATOM   4320  SD  MET A 559     -39.386  50.567  -4.085  1.00 26.02      clus S  
ATOM   4321  CE  MET A 559     -38.045  50.615  -2.963  1.00 28.49      clus C  
ATOM   4322  N   GLU A 560     -37.321  45.895  -4.436  1.00 42.00      clus N  
ATOM   4323  CA  GLU A 560     -35.929  45.764  -4.048  1.00 44.69      clus C  
ATOM   4324  C   GLU A 560     -35.209  46.736  -4.982  1.00 48.55      clus C  
ATOM   4325  O   GLU A 560     -35.826  47.278  -5.893  1.00 46.67      clus O  
ATOM   4326  CB  GLU A 560     -35.428  44.327  -4.245  1.00 49.68      clus C  
ATOM   4327  CG  GLU A 560     -35.376  43.843  -5.701  1.00 61.43      clus C  
ATOM   4328  CD  GLU A 560     -34.921  42.383  -5.856  1.00 67.03      clus C  
ATOM   4329  OE1 GLU A 560     -35.415  41.703  -6.785  1.00 68.34      clus O  
ATOM   4330  OE2 GLU A 560     -34.062  41.919  -5.069  1.00 69.16      clus O1-
ATOM   4331  N   TYR A 561     -33.930  46.996  -4.734  1.00 53.69      clus N  
ATOM   4332  CA  TYR A 561     -33.158  47.914  -5.571  1.00 55.95      clus C  
ATOM   4333  C   TYR A 561     -31.673  47.841  -5.251  1.00 58.86      clus C  
ATOM   4334  O   TYR A 561     -31.274  47.379  -4.181  1.00 62.77      clus O  
ATOM   4335  CB  TYR A 561     -33.659  49.353  -5.409  1.00 47.29      clus C  
ATOM   4336  CG  TYR A 561     -33.719  49.809  -3.978  1.00 41.69      clus C  
ATOM   4337  CD1 TYR A 561     -32.588  50.307  -3.338  1.00 40.56      clus C  
ATOM   4338  CD2 TYR A 561     -34.903  49.718  -3.253  1.00 46.00      clus C  
ATOM   4339  CE1 TYR A 561     -32.630  50.704  -2.007  1.00 44.27      clus C  
ATOM   4340  CE2 TYR A 561     -34.962  50.113  -1.916  1.00 47.58      clus C  
ATOM   4341  CZ  TYR A 561     -33.821  50.605  -1.299  1.00 47.09      clus C  
ATOM   4342  OH  TYR A 561     -33.871  51.003   0.025  1.00 48.53      clus O  
ATOM   4343  N   ARG A 562     -30.857  48.360  -6.158  1.00 61.53      clus N  
ATOM   4344  CA  ARG A 562     -29.420  48.317  -5.968  1.00 68.08      clus C  
ATOM   4345  C   ARG A 562     -28.699  49.507  -6.601  1.00 70.33      clus C  
ATOM   4346  O   ARG A 562     -29.225  50.170  -7.495  1.00 72.36      clus O  
ATOM   4347  CB  ARG A 562     -28.877  47.004  -6.546  1.00 72.26      clus C  
ATOM   4348  CG  ARG A 562     -27.386  46.758  -6.320  1.00 83.88      clus C  
ATOM   4349  CD  ARG A 562     -26.867  45.585  -7.149  1.00 85.91      clus C  
ATOM   4350  NE  ARG A 562     -26.921  45.844  -8.589  1.00 87.82      clus N  
ATOM   4351  CZ  ARG A 562     -27.921  45.476  -9.391  1.00 87.97      clus C  
ATOM   4352  NH1 ARG A 562     -28.976  44.827  -8.904  1.00 85.31      clus N1+
ATOM   4353  NH2 ARG A 562     -27.854  45.737 -10.692  1.00 86.46      clus N  
ATOM   4354  N   LEU A 563     -27.499  49.776  -6.095  1.00 68.98      clus N  
ATOM   4355  CA  LEU A 563     -26.641  50.851  -6.578  1.00 68.99      clus C  
ATOM   4356  C   LEU A 563     -25.662  50.215  -7.563  1.00 71.77      clus C  
ATOM   4357  O   LEU A 563     -25.706  49.002  -7.786  1.00 70.48      clus O  
ATOM   4358  CB  LEU A 563     -25.883  51.466  -5.393  1.00 66.45      clus C  
ATOM   4359  CG  LEU A 563     -24.888  52.609  -5.611  1.00 65.57      clus C  
ATOM   4360  CD1 LEU A 563     -25.609  53.829  -6.159  1.00 66.10      clus C  
ATOM   4361  CD2 LEU A 563     -24.181  52.930  -4.299  1.00 62.62      clus C  
ATOM   4362  N   ASP A 564     -24.795  51.026  -8.162  1.00 77.91      clus N  
ATOM   4363  CA  ASP A 564     -23.806  50.516  -9.113  1.00 82.78      clus C  
ATOM   4364  C   ASP A 564     -22.462  51.162  -8.833  1.00 82.95      clus C  
ATOM   4365  O   ASP A 564     -22.384  52.125  -8.066  1.00 82.25      clus O  
ATOM   4366  CB  ASP A 564     -24.219  50.847 -10.552  1.00 86.09      clus C  
ATOM   4367  CG  ASP A 564     -25.602  50.326 -10.901  1.00 91.54      clus C  
ATOM   4368  OD1 ASP A 564     -26.552  51.140 -10.950  1.00 90.60      clus O  
ATOM   4369  OD2 ASP A 564     -25.741  49.104 -11.117  1.00 92.76      clus O1-
ATOM   4370  N   TYR A 565     -21.396  50.605  -9.402  1.00 85.82      clus N  
ATOM   4371  CA  TYR A 565     -20.092  51.223  -9.217  1.00 87.44      clus C  
ATOM   4372  C   TYR A 565     -19.921  52.296 -10.295  1.00 84.88      clus C  
ATOM   4373  O   TYR A 565     -20.879  52.595 -11.024  1.00 82.69      clus O  
ATOM   4374  CB  TYR A 565     -18.940  50.197  -9.164  1.00 91.85      clus C  
ATOM   4375  CG  TYR A 565     -18.526  49.452 -10.431  1.00 97.35      clus C  
ATOM   4376  CD1 TYR A 565     -17.613  50.018 -11.336  1.00 98.66      clus C  
ATOM   4377  CD2 TYR A 565     -18.927  48.127 -10.650  1.00 98.37      clus C  
ATOM   4378  CE1 TYR A 565     -17.100  49.280 -12.422  1.00 99.60      clus C  
ATOM   4379  CE2 TYR A 565     -18.421  47.381 -11.731  1.00 99.73      clus C  
ATOM   4380  CZ  TYR A 565     -17.505  47.963 -12.609  1.00100.00      clus C  
ATOM   4381  OH  TYR A 565     -16.981  47.225 -13.652  1.00100.00      clus O  
ATOM   4382  N   ARG A 566     -18.735  52.895 -10.383  1.00 84.76      clus N  
ATOM   4383  CA  ARG A 566     -18.487  53.965 -11.354  1.00 87.10      clus C  
ATOM   4384  C   ARG A 566     -19.388  55.132 -10.947  1.00 85.35      clus C  
ATOM   4385  O   ARG A 566     -20.122  55.691 -11.770  1.00 83.66      clus O  
ATOM   4386  CB  ARG A 566     -18.818  53.508 -12.786  1.00 86.76      clus C  
ATOM   4387  CG  ARG A 566     -18.414  54.488 -13.887  1.00 86.70      clus C  
ATOM   4388  CD  ARG A 566     -16.907  54.676 -13.899  1.00 90.79      clus C  
ATOM   4389  NE  ARG A 566     -16.431  55.313 -15.125  1.00 95.21      clus N  
ATOM   4390  CZ  ARG A 566     -15.382  54.890 -15.828  1.00 95.35      clus C  
ATOM   4391  NH1 ARG A 566     -14.695  53.824 -15.433  1.00 94.77      clus N1+
ATOM   4392  NH2 ARG A 566     -15.017  55.540 -16.925  1.00 95.05      clus N  
ATOM   4393  N   THR A 567     -19.346  55.462  -9.656  1.00 86.93      clus N  
ATOM   4394  CA  THR A 567     -20.154  56.539  -9.093  1.00 87.17      clus C  
ATOM   4395  C   THR A 567     -19.315  57.516  -8.263  1.00 86.65      clus C  
ATOM   4396  O   THR A 567     -19.808  58.588  -7.874  1.00 81.20      clus O  
ATOM   4397  CB  THR A 567     -21.294  55.970  -8.210  1.00 89.01      clus C  
ATOM   4398  CG2 THR A 567     -22.328  57.043  -7.902  1.00 89.68      clus C  
ATOM   4399  OG1 THR A 567     -21.949  54.901  -8.902  1.00 92.26      clus O  
ATOM   4400  N   ALA A 568     -18.040  57.178  -8.044  1.00 87.98      clus N  
ATOM   4401  CA  ALA A 568     -17.160  58.036  -7.248  1.00 92.17      clus C  
ATOM   4402  C   ALA A 568     -15.854  58.579  -7.865  1.00 91.12      clus C  
ATOM   4403  O   ALA A 568     -15.584  58.411  -9.056  1.00 87.13      clus O  
ATOM   4404  CB  ALA A 568     -16.889  57.399  -5.905  1.00 89.30      clus C  
ATOM   4405  N   ALA A 569     -15.039  59.192  -7.003  1.00 89.49      clus N  
ATOM   4406  CA  ALA A 569     -13.780  59.858  -7.351  1.00 85.52      clus C  
ATOM   4407  C   ALA A 569     -12.658  59.197  -8.131  1.00 86.08      clus C  
ATOM   4408  O   ALA A 569     -12.238  58.074  -7.852  1.00 83.03      clus O  
ATOM   4409  CB  ALA A 569     -13.197  60.524  -6.119  1.00 83.66      clus C  
ATOM   4410  N   ASP A 570     -12.068  60.053  -8.964  1.00 88.91      clus N  
ATOM   4411  CA  ASP A 570     -10.946  59.790  -9.868  1.00 93.70      clus C  
ATOM   4412  C   ASP A 570      -9.895  58.784  -9.370  1.00 94.51      clus C  
ATOM   4413  O   ASP A 570      -9.622  57.783 -10.048  1.00 95.06      clus O  
ATOM   4414  CB  ASP A 570     -10.278  61.141 -10.205  1.00 95.06      clus C  
ATOM   4415  CG  ASP A 570      -9.082  61.010 -11.150  1.00 99.42      clus C  
ATOM   4416  OD1 ASP A 570      -7.936  61.160 -10.673  1.00 97.29      clus O  
ATOM   4417  OD2 ASP A 570      -9.282  60.802 -12.368  1.00100.00      clus O1-
ATOM   4418  N   THR A 571      -9.301  59.062  -8.205  1.00 94.99      clus N  
ATOM   4419  CA  THR A 571      -8.268  58.195  -7.625  1.00 94.45      clus C  
ATOM   4420  C   THR A 571      -8.814  56.801  -7.372  1.00 88.39      clus C  
ATOM   4421  O   THR A 571      -9.648  56.601  -6.480  1.00 83.03      clus O  
ATOM   4422  CB  THR A 571      -7.677  58.767  -6.295  1.00 96.88      clus C  
ATOM   4423  CG2 THR A 571      -6.683  57.785  -5.676  1.00 97.86      clus C  
ATOM   4424  OG1 THR A 571      -6.990  59.999  -6.560  1.00100.00      clus O  
ATOM   4425  N   THR A 572      -8.381  55.867  -8.223  1.00 85.59      clus N  
ATOM   4426  CA  THR A 572      -8.767  54.459  -8.154  1.00 85.89      clus C  
ATOM   4427  C   THR A 572     -10.262  54.249  -8.323  1.00 82.04      clus C  
ATOM   4428  O   THR A 572     -10.707  53.133  -8.603  1.00 79.10      clus O  
ATOM   4429  CB  THR A 572      -8.360  53.841  -6.800  1.00 89.88      clus C  
ATOM   4430  CG2 THR A 572      -8.611  52.333  -6.789  1.00 90.49      clus C  
ATOM   4431  OG1 THR A 572      -6.972  54.097  -6.555  1.00 93.66      clus O  
ATOM   4432  N   GLY A 573     -11.030  55.328  -8.186  1.00 78.78      clus N  
ATOM   4433  CA  GLY A 573     -12.469  55.222  -8.272  1.00 69.81      clus C  
ATOM   4434  C   GLY A 573     -12.888  54.575  -6.963  1.00 59.58      clus C  
ATOM   4435  O   GLY A 573     -12.757  53.359  -6.793  1.00 62.32      clus O  
ATOM   4436  N   LEU A 574     -13.328  55.388  -6.011  1.00 47.82      clus N  
ATOM   4437  CA  LEU A 574     -13.731  54.860  -4.720  1.00 38.92      clus C  
ATOM   4438  C   LEU A 574     -15.239  54.837  -4.522  1.00 38.22      clus C  
ATOM   4439  O   LEU A 574     -15.814  55.728  -3.884  1.00 35.52      clus O  
ATOM   4440  CB  LEU A 574     -13.083  55.655  -3.596  1.00 32.94      clus C  
ATOM   4441  CG  LEU A 574     -12.620  54.771  -2.451  1.00 23.55      clus C  
ATOM   4442  CD1 LEU A 574     -11.316  54.116  -2.881  1.00 12.23      clus C  
ATOM   4443  CD2 LEU A 574     -12.468  55.601  -1.175  1.00 21.14      clus C  
ATOM   4444  N   GLN A 575     -15.862  53.775  -5.021  1.00 42.28      clus N  
ATOM   4445  CA  GLN A 575     -17.302  53.596  -4.913  1.00 41.88      clus C  
ATOM   4446  C   GLN A 575     -17.810  53.601  -3.486  1.00 37.54      clus C  
ATOM   4447  O   GLN A 575     -17.150  53.122  -2.580  1.00 39.72      clus O  
ATOM   4448  CB  GLN A 575     -17.715  52.313  -5.622  1.00 46.41      clus C  
ATOM   4449  CG  GLN A 575     -16.785  51.141  -5.396  1.00 55.24      clus C  
ATOM   4450  CD  GLN A 575     -16.919  50.110  -6.492  1.00 61.57      clus C  
ATOM   4451  NE2 GLN A 575     -16.129  50.267  -7.547  1.00 64.50      clus N  
ATOM   4452  OE1 GLN A 575     -17.746  49.203  -6.412  1.00 67.09      clus O  
ATOM   4453  N   PRO A 576     -18.975  54.212  -3.270  1.00 39.30      clus N  
ATOM   4454  CA  PRO A 576     -19.652  54.332  -1.973  1.00 41.47      clus C  
ATOM   4455  C   PRO A 576     -20.391  53.050  -1.537  1.00 36.92      clus C  
ATOM   4456  O   PRO A 576     -20.227  51.985  -2.131  1.00 37.29      clus O  
ATOM   4457  CB  PRO A 576     -20.664  55.463  -2.230  1.00 42.06      clus C  
ATOM   4458  CG  PRO A 576     -20.106  56.202  -3.421  1.00 41.08      clus C  
ATOM   4459  CD  PRO A 576     -19.612  55.082  -4.269  1.00 41.91      clus C  
ATOM   4460  N   ILE A 577     -21.187  53.169  -0.477  1.00 32.92      clus N  
ATOM   4461  CA  ILE A 577     -22.000  52.073   0.036  1.00 34.83      clus C  
ATOM   4462  C   ILE A 577     -23.166  52.613   0.816  1.00 32.00      clus C  
ATOM   4463  O   ILE A 577     -23.086  53.675   1.429  1.00 23.93      clus O  
ATOM   4464  CB  ILE A 577     -21.253  51.093   0.976  1.00 42.24      clus C  
ATOM   4465  CG1 ILE A 577     -20.038  51.758   1.615  1.00 41.75      clus C  
ATOM   4466  CG2 ILE A 577     -20.965  49.785   0.271  1.00 47.76      clus C  
ATOM   4467  CD1 ILE A 577     -20.403  52.742   2.697  1.00 44.75      clus C  
ATOM   4468  N   LEU A 578     -24.247  51.848   0.800  1.00 34.14      clus N  
ATOM   4469  CA  LEU A 578     -25.455  52.208   1.505  1.00 37.42      clus C  
ATOM   4470  C   LEU A 578     -25.069  52.125   2.961  1.00 37.40      clus C  
ATOM   4471  O   LEU A 578     -24.076  51.477   3.294  1.00 34.61      clus O  
ATOM   4472  CB  LEU A 578     -26.561  51.198   1.190  1.00 41.61      clus C  
ATOM   4473  CG  LEU A 578     -26.949  50.952  -0.277  1.00 43.84      clus C  
ATOM   4474  CD1 LEU A 578     -27.313  52.264  -0.920  1.00 49.69      clus C  
ATOM   4475  CD2 LEU A 578     -25.829  50.284  -1.069  1.00 44.64      clus C  
ATOM   4476  N   ASN A 579     -25.808  52.807   3.827  1.00 41.17      clus N  
ATOM   4477  CA  ASN A 579     -25.480  52.740   5.239  1.00 45.95      clus C  
ATOM   4478  C   ASN A 579     -25.631  51.314   5.728  1.00 50.12      clus C  
ATOM   4479  O   ASN A 579     -26.339  50.503   5.134  1.00 55.19      clus O  
ATOM   4480  CB  ASN A 579     -26.342  53.668   6.095  1.00 47.79      clus C  
ATOM   4481  CG  ASN A 579     -26.010  53.553   7.582  1.00 56.46      clus C  
ATOM   4482  ND2 ASN A 579     -25.006  54.301   8.029  1.00 62.27      clus N  
ATOM   4483  OD1 ASN A 579     -26.616  52.759   8.302  1.00 61.04      clus O  
ATOM   4484  N   GLN A 580     -24.941  51.031   6.821  1.00 54.96      clus N  
ATOM   4485  CA  GLN A 580     -24.923  49.730   7.468  1.00 58.02      clus C  
ATOM   4486  C   GLN A 580     -26.309  49.105   7.569  1.00 57.12      clus C  
ATOM   4487  O   GLN A 580     -26.631  48.146   6.874  1.00 59.24      clus O  
ATOM   4488  CB  GLN A 580     -24.339  49.911   8.869  1.00 58.84      clus C  
ATOM   4489  CG  GLN A 580     -23.542  48.744   9.416  1.00 52.53      clus C  
ATOM   4490  CD  GLN A 580     -22.970  49.061  10.781  1.00 54.84      clus C  
ATOM   4491  NE2 GLN A 580     -22.152  48.156  11.299  1.00 55.12      clus N  
ATOM   4492  OE1 GLN A 580     -23.260  50.115  11.366  1.00 55.99      clus O  
ATOM   4493  N   PHE A 581     -27.141  49.684   8.418  1.00 58.27      clus N  
ATOM   4494  CA  PHE A 581     -28.465  49.151   8.615  1.00 62.74      clus C  
ATOM   4495  C   PHE A 581     -29.531  49.806   7.758  1.00 60.56      clus C  
ATOM   4496  O   PHE A 581     -30.359  50.589   8.241  1.00 63.03      clus O  
ATOM   4497  CB  PHE A 581     -28.812  49.186  10.100  1.00 72.23      clus C  
ATOM   4498  CG  PHE A 581     -27.862  48.385  10.948  1.00 79.04      clus C  
ATOM   4499  CD1 PHE A 581     -27.381  48.890  12.155  1.00 79.39      clus C  
ATOM   4500  CD2 PHE A 581     -27.423  47.130  10.521  1.00 77.77      clus C  
ATOM   4501  CE1 PHE A 581     -26.475  48.157  12.927  1.00 73.00      clus C  
ATOM   4502  CE2 PHE A 581     -26.519  46.391  11.284  1.00 72.26      clus C  
ATOM   4503  CZ  PHE A 581     -26.043  46.904  12.489  1.00 68.99      clus C  
ATOM   4504  N   THR A 582     -29.449  49.534   6.460  1.00 52.95      clus N  
ATOM   4505  CA  THR A 582     -30.427  50.047   5.519  1.00 48.40      clus C  
ATOM   4506  C   THR A 582     -30.956  48.860   4.753  1.00 48.42      clus C  
ATOM   4507  O   THR A 582     -30.189  48.067   4.193  1.00 49.17      clus O  
ATOM   4508  CB  THR A 582     -29.863  51.066   4.490  1.00 48.66      clus C  
ATOM   4509  CG2 THR A 582     -29.328  52.300   5.184  1.00 43.54      clus C  
ATOM   4510  OG1 THR A 582     -28.844  50.452   3.690  1.00 45.76      clus O  
ATOM   4511  N   PRO A 583     -32.274  48.651   4.833  1.00 46.46      clus N  
ATOM   4512  CA  PRO A 583     -32.949  47.551   4.138  1.00 41.17      clus C  
ATOM   4513  C   PRO A 583     -33.031  47.921   2.656  1.00 30.48      clus C  
ATOM   4514  O   PRO A 583     -33.341  49.061   2.314  1.00 30.55      clus O  
ATOM   4515  CB  PRO A 583     -34.336  47.552   4.789  1.00 43.00      clus C  
ATOM   4516  CG  PRO A 583     -34.090  48.171   6.160  1.00 41.45      clus C  
ATOM   4517  CD  PRO A 583     -33.169  49.296   5.809  1.00 40.56      clus C  
ATOM   4518  N   ALA A 584     -32.713  46.986   1.773  1.00 26.67      clus N  
ATOM   4519  CA  ALA A 584     -32.777  47.274   0.341  1.00 32.07      clus C  
ATOM   4520  C   ALA A 584     -34.170  47.060  -0.259  1.00 36.52      clus C  
ATOM   4521  O   ALA A 584     -34.388  47.352  -1.433  1.00 39.39      clus O  
ATOM   4522  CB  ALA A 584     -31.734  46.441  -0.426  1.00 23.18      clus C  
ATOM   4523  N   ASN A 585     -35.101  46.531   0.534  1.00 42.04      clus N  
ATOM   4524  CA  ASN A 585     -36.451  46.281   0.039  1.00 46.65      clus C  
ATOM   4525  C   ASN A 585     -37.543  46.860   0.892  1.00 44.60      clus C  
ATOM   4526  O   ASN A 585     -37.368  47.142   2.076  1.00 42.76      clus O  
ATOM   4527  CB  ASN A 585     -36.773  44.787  -0.068  1.00 49.18      clus C  
ATOM   4528  CG  ASN A 585     -35.563  43.917  -0.001  1.00 59.89      clus C  
ATOM   4529  ND2 ASN A 585     -35.450  43.146   1.083  1.00 71.14      clus N  
ATOM   4530  OD1 ASN A 585     -34.747  43.929  -0.924  1.00 57.33      clus O  
ATOM   4531  N   ILE A 586     -38.708  46.947   0.274  1.00 42.09      clus N  
ATOM   4532  CA  ILE A 586     -39.895  47.412   0.944  1.00 42.91      clus C  
ATOM   4533  C   ILE A 586     -41.068  46.737   0.259  1.00 43.37      clus C  
ATOM   4534  O   ILE A 586     -41.088  46.585  -0.967  1.00 47.51      clus O  
ATOM   4535  CB  ILE A 586     -40.038  48.959   0.942  1.00 44.02      clus C  
ATOM   4536  CG1 ILE A 586     -41.324  49.360   1.673  1.00 42.26      clus C  
ATOM   4537  CG2 ILE A 586     -40.014  49.511  -0.477  1.00 47.10      clus C  
ATOM   4538  CD1 ILE A 586     -41.525  48.652   3.022  1.00 42.53      clus C  
ATOM   4539  N   SER A 587     -41.985  46.229   1.074  1.00 44.81      clus N  
ATOM   4540  CA  SER A 587     -43.166  45.555   0.573  1.00 43.34      clus C  
ATOM   4541  C   SER A 587     -44.433  46.288   1.012  1.00 44.96      clus C  
ATOM   4542  O   SER A 587     -44.513  46.868   2.099  1.00 49.49      clus O  
ATOM   4543  CB  SER A 587     -43.195  44.085   1.030  1.00 43.28      clus C  
ATOM   4544  OG  SER A 587     -42.248  43.288   0.326  1.00 46.91      clus O  
ATOM   4545  N   ARG A 588     -45.409  46.278   0.124  1.00 47.99      clus N  
ATOM   4546  CA  ARG A 588     -46.691  46.913   0.341  1.00 47.23      clus C  
ATOM   4547  C   ARG A 588     -47.646  45.829  -0.189  1.00 48.23      clus C  
ATOM   4548  O   ARG A 588     -47.266  45.062  -1.080  1.00 45.78      clus O  
ATOM   4549  CB  ARG A 588     -46.730  48.191  -0.507  1.00 46.71      clus C  
ATOM   4550  CG  ARG A 588     -47.535  49.339   0.055  1.00 51.28      clus C  
ATOM   4551  CD  ARG A 588     -47.186  49.630   1.501  1.00 60.46      clus C  
ATOM   4552  NE  ARG A 588     -45.774  49.927   1.703  1.00 66.50      clus N  
ATOM   4553  CZ  ARG A 588     -45.314  50.729   2.659  1.00 70.67      clus C  
ATOM   4554  NH1 ARG A 588     -46.153  51.326   3.503  1.00 72.62      clus N1+
ATOM   4555  NH2 ARG A 588     -44.011  50.918   2.781  1.00 71.96      clus N  
ATOM   4556  N   GLN A 589     -48.854  45.719   0.360  1.00 42.44      clus N  
ATOM   4557  CA  GLN A 589     -49.755  44.671  -0.110  1.00 36.46      clus C  
ATOM   4558  C   GLN A 589     -51.208  45.005  -0.407  1.00 39.05      clus C  
ATOM   4559  O   GLN A 589     -51.874  45.729   0.340  1.00 33.82      clus O  
ATOM   4560  CB  GLN A 589     -49.703  43.476   0.832  1.00 40.41      clus C  
ATOM   4561  CG  GLN A 589     -50.024  43.816   2.265  1.00 40.39      clus C  
ATOM   4562  CD  GLN A 589     -50.066  42.592   3.145  1.00 41.68      clus C  
ATOM   4563  NE2 GLN A 589     -51.146  42.455   3.897  1.00 44.20      clus N  
ATOM   4564  OE1 GLN A 589     -49.148  41.763   3.136  1.00 42.33      clus O  
ATOM   4565  N   ALA A 590     -51.692  44.400  -1.493  1.00 38.21      clus N  
ATOM   4566  CA  ALA A 590     -53.060  44.555  -1.974  1.00 37.59      clus C  
ATOM   4567  C   ALA A 590     -53.919  43.406  -1.465  1.00 37.97      clus C  
ATOM   4568  O   ALA A 590     -53.424  42.293  -1.235  1.00 39.23      clus O  
ATOM   4569  CB  ALA A 590     -53.084  44.594  -3.499  1.00 31.64      clus C  
ATOM   4570  N   HIS A 591     -55.208  43.698  -1.287  1.00 36.65      clus N  
ATOM   4571  CA  HIS A 591     -56.190  42.733  -0.810  1.00 32.15      clus C  
ATOM   4572  C   HIS A 591     -57.403  42.736  -1.713  1.00 32.96      clus C  
ATOM   4573  O   HIS A 591     -58.060  43.759  -1.868  1.00 33.33      clus O  
ATOM   4574  CB  HIS A 591     -56.641  43.087   0.605  1.00 37.22      clus C  
ATOM   4575  CG  HIS A 591     -55.538  43.052   1.607  1.00 48.39      clus C  
ATOM   4576  CD2 HIS A 591     -55.044  42.033   2.349  1.00 52.93      clus C  
ATOM   4577  ND1 HIS A 591     -54.766  44.154   1.910  1.00 54.73      clus N  
ATOM   4578  CE1 HIS A 591     -53.847  43.818   2.788  1.00 57.37      clus C  
ATOM   4579  NE2 HIS A 591     -53.990  42.534   3.075  1.00 58.82      clus N  
ATOM   4580  N   ILE A 592     -57.701  41.590  -2.311  1.00 29.79      clus N  
ATOM   4581  CA  ILE A 592     -58.865  41.462  -3.178  1.00 27.79      clus C  
ATOM   4582  C   ILE A 592     -60.146  41.743  -2.407  1.00 29.15      clus C  
ATOM   4583  O   ILE A 592     -60.316  41.302  -1.271  1.00 32.08      clus O  
ATOM   4584  CB  ILE A 592     -58.959  40.055  -3.784  1.00 20.49      clus C  
ATOM   4585  CG1 ILE A 592     -57.785  39.846  -4.744  1.00 13.80      clus C  
ATOM   4586  CG2 ILE A 592     -60.314  39.855  -4.429  1.00  9.97      clus C  
ATOM   4587  CD1 ILE A 592     -57.920  38.677  -5.666  1.00  2.00      clus C  
ATOM   4588  N   LEU A 593     -61.042  42.498  -3.021  1.00 34.20      clus N  
ATOM   4589  CA  LEU A 593     -62.292  42.805  -2.367  1.00 41.93      clus C  
ATOM   4590  C   LEU A 593     -63.027  41.487  -2.263  1.00 37.09      clus C  
ATOM   4591  O   LEU A 593     -63.145  40.759  -3.247  1.00 39.51      clus O  
ATOM   4592  CB  LEU A 593     -63.100  43.795  -3.197  1.00 43.93      clus C  
ATOM   4593  CG  LEU A 593     -64.009  44.722  -2.387  1.00 48.21      clus C  
ATOM   4594  CD1 LEU A 593     -64.613  45.737  -3.330  1.00 46.55      clus C  
ATOM   4595  CD2 LEU A 593     -65.097  43.953  -1.643  1.00 44.26      clus C  
ATOM   4596  N   LEU A 594     -63.466  41.162  -1.055  1.00 30.55      clus N  
ATOM   4597  CA  LEU A 594     -64.186  39.926  -0.815  1.00 26.66      clus C  
ATOM   4598  C   LEU A 594     -64.829  40.013   0.548  1.00 27.41      clus C  
ATOM   4599  O   LEU A 594     -64.177  40.355   1.531  1.00 28.80      clus O  
ATOM   4600  CB  LEU A 594     -63.228  38.743  -0.857  1.00 25.95      clus C  
ATOM   4601  CG  LEU A 594     -63.747  37.308  -0.930  1.00 18.39      clus C  
ATOM   4602  CD1 LEU A 594     -62.538  36.421  -0.988  1.00 23.44      clus C  
ATOM   4603  CD2 LEU A 594     -64.597  36.922   0.252  1.00  8.65      clus C  
ATOM   4604  N   ASP A 595     -66.103  39.660   0.603  1.00 30.95      clus N  
ATOM   4605  CA  ASP A 595     -66.867  39.700   1.837  1.00 38.03      clus C  
ATOM   4606  C   ASP A 595     -66.961  41.078   2.483  1.00 43.29      clus C  
ATOM   4607  O   ASP A 595     -67.153  41.183   3.693  1.00 47.81      clus O  
ATOM   4608  CB  ASP A 595     -66.355  38.663   2.841  1.00 35.37      clus C  
ATOM   4609  CG  ASP A 595     -66.895  37.270   2.570  1.00 31.03      clus C  
ATOM   4610  OD1 ASP A 595     -66.222  36.290   2.959  1.00 30.32      clus O  
ATOM   4611  OD2 ASP A 595     -67.990  37.149   1.984  1.00 22.84      clus O1-
ATOM   4612  N   CYS A 596     -66.742  42.133   1.703  1.00 52.44      clus N  
ATOM   4613  CA  CYS A 596     -66.890  43.479   2.243  1.00 63.57      clus C  
ATOM   4614  C   CYS A 596     -68.335  43.807   1.838  1.00 69.47      clus C  
ATOM   4615  O   CYS A 596     -69.101  44.390   2.609  1.00 69.65      clus O  
ATOM   4616  CB  CYS A 596     -65.833  44.456   1.677  1.00 57.84      clus C  
ATOM   4617  SG  CYS A 596     -64.074  44.173   2.179  1.00 39.20      clus S  
ATOM   4618  N   GLY A 597     -68.713  43.344   0.647  1.00 76.80      clus N  
ATOM   4619  CA  GLY A 597     -70.080  43.490   0.172  1.00 81.78      clus C  
ATOM   4620  C   GLY A 597     -70.692  44.735  -0.445  1.00 82.32      clus C  
ATOM   4621  O   GLY A 597     -70.119  45.374  -1.332  1.00 79.35      clus O  
ATOM   4622  N   GLU A 598     -71.921  45.017  -0.011  1.00 83.04      clus N  
ATOM   4623  CA  GLU A 598     -72.701  46.150  -0.509  1.00 82.32      clus C  
ATOM   4624  C   GLU A 598     -72.327  47.443   0.190  1.00 79.19      clus C  
ATOM   4625  O   GLU A 598     -72.273  48.501  -0.438  1.00 85.33      clus O  
ATOM   4626  CB  GLU A 598     -74.196  45.842  -0.403  1.00 86.68      clus C  
ATOM   4627  CG  GLU A 598     -74.995  46.738   0.509  1.00 89.76      clus C  
ATOM   4628  CD  GLU A 598     -76.080  45.969   1.222  1.00 92.18      clus C  
ATOM   4629  OE1 GLU A 598     -77.061  45.555   0.562  1.00 89.87      clus O  
ATOM   4630  OE2 GLU A 598     -75.933  45.756   2.443  1.00 95.87      clus O1-
ATOM   4631  N   ASP A 599     -72.071  47.347   1.493  1.00 71.78      clus N  
ATOM   4632  CA  ASP A 599     -71.607  48.476   2.304  1.00 58.26      clus C  
ATOM   4633  C   ASP A 599     -70.275  48.822   1.589  1.00 48.25      clus C  
ATOM   4634  O   ASP A 599     -69.809  49.959   1.585  1.00 36.16      clus O  
ATOM   4635  CB  ASP A 599     -71.432  47.957   3.753  1.00 64.57      clus C  
ATOM   4636  CG  ASP A 599     -70.633  48.895   4.669  1.00 71.55      clus C  
ATOM   4637  OD1 ASP A 599     -70.346  48.476   5.820  1.00 69.11      clus O  
ATOM   4638  OD2 ASP A 599     -70.271  50.017   4.259  1.00 76.53      clus O1-
ATOM   4639  N   ASN A 600     -69.774  47.809   0.881  1.00 48.19      clus N  
ATOM   4640  CA  ASN A 600     -68.576  47.813   0.052  1.00 47.75      clus C  
ATOM   4641  C   ASN A 600     -67.201  47.921   0.679  1.00 43.70      clus C  
ATOM   4642  O   ASN A 600     -66.188  47.623   0.032  1.00 40.48      clus O  
ATOM   4643  CB  ASN A 600     -68.718  48.801  -1.095  1.00 51.71      clus C  
ATOM   4644  CG  ASN A 600     -68.186  48.236  -2.388  1.00 59.53      clus C  
ATOM   4645  ND2 ASN A 600     -67.725  49.105  -3.278  1.00 64.82      clus N  
ATOM   4646  OD1 ASN A 600     -68.173  47.019  -2.577  1.00 62.58      clus O  
ATOM   4647  N   VAL A 601     -67.158  48.339   1.932  1.00 33.38      clus N  
ATOM   4648  CA  VAL A 601     -65.892  48.462   2.612  1.00 28.50      clus C  
ATOM   4649  C   VAL A 601     -65.913  47.730   3.921  1.00 32.36      clus C  
ATOM   4650  O   VAL A 601     -66.792  47.947   4.754  1.00 30.82      clus O  
ATOM   4651  CB  VAL A 601     -65.483  49.932   2.865  1.00 29.01      clus C  
ATOM   4652  CG1 VAL A 601     -64.877  50.519   1.601  1.00 25.07      clus C  
ATOM   4653  CG2 VAL A 601     -66.674  50.762   3.374  1.00 21.42      clus C  
ATOM   4654  N   CYS A 602     -64.918  46.870   4.099  1.00 31.31      clus N  
ATOM   4655  CA  CYS A 602     -64.767  46.095   5.309  1.00 30.88      clus C  
ATOM   4656  C   CYS A 602     -64.507  47.015   6.499  1.00 30.28      clus C  
ATOM   4657  O   CYS A 602     -63.484  47.700   6.556  1.00 32.31      clus O  
ATOM   4658  CB  CYS A 602     -63.640  45.094   5.115  1.00 29.47      clus C  
ATOM   4659  SG  CYS A 602     -64.147  43.640   4.141  1.00 33.09      clus S  
ATOM   4660  N   LYS A 603     -65.508  47.107   7.373  1.00 28.38      clus N  
ATOM   4661  CA  LYS A 603     -65.457  47.921   8.584  1.00 35.57      clus C  
ATOM   4662  C   LYS A 603     -65.517  46.942   9.749  1.00 38.64      clus C  
ATOM   4663  O   LYS A 603     -66.599  46.625  10.248  1.00 41.31      clus O  
ATOM   4664  CB  LYS A 603     -66.676  48.845   8.685  1.00 41.51      clus C  
ATOM   4665  CG  LYS A 603     -66.823  49.922   7.626  1.00 48.56      clus C  
ATOM   4666  CD  LYS A 603     -68.101  50.725   7.896  1.00 53.26      clus C  
ATOM   4667  CE  LYS A 603     -68.320  51.825   6.873  1.00 53.85      clus C  
ATOM   4668  NZ  LYS A 603     -69.555  52.592   7.180  1.00 48.41      clus N1+
ATOM   4669  N   PRO A 604     -64.358  46.448  10.198  1.00 37.35      clus N  
ATOM   4670  CA  PRO A 604     -64.256  45.492  11.303  1.00 33.04      clus C  
ATOM   4671  C   PRO A 604     -64.425  46.072  12.703  1.00 33.55      clus C  
ATOM   4672  O   PRO A 604     -64.062  47.220  12.956  1.00 41.95      clus O  
ATOM   4673  CB  PRO A 604     -62.855  44.925  11.108  1.00 32.61      clus C  
ATOM   4674  CG  PRO A 604     -62.101  46.107  10.603  1.00 26.41      clus C  
ATOM   4675  CD  PRO A 604     -63.035  46.700   9.600  1.00 28.87      clus C  
ATOM   4676  N   LYS A 605     -64.981  45.275  13.609  1.00 28.33      clus N  
ATOM   4677  CA  LYS A 605     -65.146  45.712  14.992  1.00 37.09      clus C  
ATOM   4678  C   LYS A 605     -64.171  44.931  15.882  1.00 42.78      clus C  
ATOM   4679  O   LYS A 605     -64.450  43.798  16.282  1.00 48.71      clus O  
ATOM   4680  CB  LYS A 605     -66.591  45.523  15.475  1.00 39.13      clus C  
ATOM   4681  CG  LYS A 605     -66.830  45.958  16.935  1.00 42.81      clus C  
ATOM   4682  CD  LYS A 605     -68.270  45.733  17.394  1.00 44.49      clus C  
ATOM   4683  CE  LYS A 605     -68.468  46.086  18.872  1.00 47.94      clus C  
ATOM   4684  NZ  LYS A 605     -67.812  45.131  19.819  1.00 45.78      clus N1+
ATOM   4685  N   LEU A 606     -63.033  45.547  16.189  1.00 44.14      clus N  
ATOM   4686  CA  LEU A 606     -62.001  44.917  17.005  1.00 43.28      clus C  
ATOM   4687  C   LEU A 606     -62.155  45.245  18.491  1.00 45.01      clus C  
ATOM   4688  O   LEU A 606     -62.606  46.334  18.848  1.00 39.88      clus O  
ATOM   4689  CB  LEU A 606     -60.628  45.346  16.487  1.00 37.25      clus C  
ATOM   4690  CG  LEU A 606     -60.508  45.234  14.960  1.00 34.47      clus C  
ATOM   4691  CD1 LEU A 606     -59.453  46.175  14.426  1.00 36.05      clus C  
ATOM   4692  CD2 LEU A 606     -60.231  43.805  14.541  1.00 25.55      clus C  
ATOM   4693  N   GLU A 607     -61.811  44.287  19.350  1.00 48.31      clus N  
ATOM   4694  CA  GLU A 607     -61.897  44.469  20.805  1.00 57.13      clus C  
ATOM   4695  C   GLU A 607     -60.871  43.636  21.556  1.00 57.19      clus C  
ATOM   4696  O   GLU A 607     -60.842  42.409  21.430  1.00 58.84      clus O  
ATOM   4697  CB  GLU A 607     -63.301  44.157  21.325  1.00 63.43      clus C  
ATOM   4698  CG  GLU A 607     -63.865  42.829  20.871  1.00 70.91      clus C  
ATOM   4699  CD  GLU A 607     -65.167  42.989  20.110  1.00 76.66      clus C  
ATOM   4700  OE1 GLU A 607     -65.117  43.147  18.872  1.00 73.87      clus O  
ATOM   4701  OE2 GLU A 607     -66.239  42.961  20.753  1.00 80.54      clus O1-
ATOM   4702  N   VAL A 608     -60.043  44.317  22.349  1.00 58.14      clus N  
ATOM   4703  CA  VAL A 608     -58.977  43.682  23.129  1.00 56.67      clus C  
ATOM   4704  C   VAL A 608     -59.411  43.428  24.561  1.00 53.07      clus C  
ATOM   4705  O   VAL A 608     -59.829  44.352  25.252  1.00 51.22      clus O  
ATOM   4706  CB  VAL A 608     -57.711  44.574  23.197  1.00 55.87      clus C  
ATOM   4707  CG1 VAL A 608     -56.502  43.735  23.526  1.00 53.35      clus C  
ATOM   4708  CG2 VAL A 608     -57.508  45.326  21.905  1.00 58.22      clus C  
ATOM   4709  N   SER A 609     -59.272  42.185  25.013  1.00 52.44      clus N  
ATOM   4710  CA  SER A 609     -59.645  41.820  26.378  1.00 54.11      clus C  
ATOM   4711  C   SER A 609     -58.494  41.135  27.109  1.00 56.82      clus C  
ATOM   4712  O   SER A 609     -57.704  40.427  26.492  1.00 55.56      clus O  
ATOM   4713  CB  SER A 609     -60.867  40.905  26.368  1.00 56.03      clus C  
ATOM   4714  OG  SER A 609     -61.191  40.502  27.688  1.00 57.26      clus O  
ATOM   4715  N   VAL A 610     -58.427  41.314  28.428  1.00 59.31      clus N  
ATOM   4716  CA  VAL A 610     -57.358  40.712  29.232  1.00 64.53      clus C  
ATOM   4717  C   VAL A 610     -57.773  40.429  30.694  1.00 72.34      clus C  
ATOM   4718  O   VAL A 610     -58.680  41.084  31.226  1.00 68.49      clus O  
ATOM   4719  CB  VAL A 610     -56.091  41.603  29.193  1.00 62.61      clus C  
ATOM   4720  CG1 VAL A 610     -56.311  42.884  29.985  1.00 63.69      clus C  
ATOM   4721  CG2 VAL A 610     -54.884  40.840  29.681  1.00 66.38      clus C  
ATOM   4722  N   ASP A 611     -57.112  39.454  31.333  1.00 79.08      clus N  
ATOM   4723  CA  ASP A 611     -57.422  39.072  32.724  1.00 88.91      clus C  
ATOM   4724  C   ASP A 611     -56.326  39.271  33.789  1.00 91.42      clus C  
ATOM   4725  O   ASP A 611     -55.142  39.421  33.467  1.00 91.33      clus O  
ATOM   4726  CB  ASP A 611     -57.944  37.627  32.785  1.00 92.93      clus C  
ATOM   4727  CG  ASP A 611     -59.468  37.542  32.681  1.00 96.14      clus C  
ATOM   4728  OD1 ASP A 611     -60.169  38.332  33.359  1.00 97.68      clus O  
ATOM   4729  OD2 ASP A 611     -59.962  36.671  31.931  1.00 96.56      clus O1-
ATOM   4730  N   SER A 612     -56.743  39.227  35.059  1.00 92.19      clus N  
ATOM   4731  CA  SER A 612     -55.857  39.421  36.218  1.00 94.86      clus C  
ATOM   4732  C   SER A 612     -55.259  38.136  36.811  1.00 94.17      clus C  
ATOM   4733  O   SER A 612     -55.239  37.950  38.033  1.00 91.36      clus O  
ATOM   4734  CB  SER A 612     -56.608  40.175  37.321  1.00 96.38      clus C  
ATOM   4735  OG  SER A 612     -57.275  41.311  36.808  1.00 99.14      clus O  
ATOM   4736  N   ASP A 613     -54.760  37.260  35.947  1.00 93.76      clus N  
ATOM   4737  CA  ASP A 613     -54.159  36.010  36.392  1.00 91.81      clus C  
ATOM   4738  C   ASP A 613     -52.886  36.315  37.179  1.00 90.23      clus C  
ATOM   4739  O   ASP A 613     -51.906  36.810  36.618  1.00 90.35      clus O  
ATOM   4740  CB  ASP A 613     -53.849  35.124  35.185  1.00 93.02      clus C  
ATOM   4741  CG  ASP A 613     -53.297  33.770  35.581  1.00 97.27      clus C  
ATOM   4742  OD1 ASP A 613     -54.090  32.903  36.015  1.00100.00      clus O  
ATOM   4743  OD2 ASP A 613     -52.070  33.574  35.455  1.00 98.90      clus O1-
ATOM   4744  N   GLN A 614     -52.927  36.022  38.479  1.00 87.01      clus N  
ATOM   4745  CA  GLN A 614     -51.819  36.255  39.420  1.00 85.13      clus C  
ATOM   4746  C   GLN A 614     -51.651  37.756  39.650  1.00 80.47      clus C  
ATOM   4747  O   GLN A 614     -50.660  38.365  39.252  1.00 77.64      clus O  
ATOM   4748  CB  GLN A 614     -50.509  35.620  38.926  1.00 86.84      clus C  
ATOM   4749  CG  GLN A 614     -49.561  35.176  40.050  1.00 94.37      clus C  
ATOM   4750  CD  GLN A 614     -50.074  33.959  40.818  1.00 98.07      clus C  
ATOM   4751  NE2 GLN A 614     -50.866  34.201  41.860  1.00 93.39      clus N  
ATOM   4752  OE1 GLN A 614     -49.756  32.815  40.477  1.00 99.32      clus O  
ATOM   4753  N   LYS A 615     -52.624  38.317  40.354  1.00 76.51      clus N  
ATOM   4754  CA  LYS A 615     -52.709  39.739  40.656  1.00 75.26      clus C  
ATOM   4755  C   LYS A 615     -51.519  40.526  41.217  1.00 73.82      clus C  
ATOM   4756  O   LYS A 615     -51.619  41.750  41.340  1.00 76.83      clus O  
ATOM   4757  CB  LYS A 615     -53.945  39.983  41.520  1.00 81.54      clus C  
ATOM   4758  CG  LYS A 615     -55.227  39.507  40.863  1.00 88.80      clus C  
ATOM   4759  CD  LYS A 615     -56.415  39.572  41.808  1.00 93.67      clus C  
ATOM   4760  CE  LYS A 615     -56.791  41.001  42.155  1.00 96.17      clus C  
ATOM   4761  NZ  LYS A 615     -57.996  41.028  43.031  1.00100.00      clus N1+
ATOM   4762  N   LYS A 616     -50.397  39.875  41.534  1.00 67.83      clus N  
ATOM   4763  CA  LYS A 616     -49.246  40.617  42.075  1.00 59.98      clus C  
ATOM   4764  C   LYS A 616     -47.833  40.122  41.746  1.00 49.89      clus C  
ATOM   4765  O   LYS A 616     -47.629  38.979  41.332  1.00 53.52      clus O  
ATOM   4766  CB  LYS A 616     -49.399  40.825  43.592  1.00 60.93      clus C  
ATOM   4767  CG  LYS A 616     -49.980  39.634  44.343  1.00 67.81      clus C  
ATOM   4768  CD  LYS A 616     -49.034  38.439  44.335  1.00 72.70      clus C  
ATOM   4769  CE  LYS A 616     -49.781  37.116  44.484  1.00 72.59      clus C  
ATOM   4770  NZ  LYS A 616     -50.597  36.780  43.273  1.00 76.30      clus N1+
ATOM   4771  N   ILE A 617     -46.862  41.014  41.915  1.00 43.49      clus N  
ATOM   4772  CA  ILE A 617     -45.462  40.697  41.650  1.00 47.23      clus C  
ATOM   4773  C   ILE A 617     -44.549  41.391  42.666  1.00 49.19      clus C  
ATOM   4774  O   ILE A 617     -44.457  42.623  42.698  1.00 50.42      clus O  
ATOM   4775  CB  ILE A 617     -45.053  41.104  40.235  1.00 39.20      clus C  
ATOM   4776  CG1 ILE A 617     -45.497  42.541  39.962  1.00 39.20      clus C  
ATOM   4777  CG2 ILE A 617     -45.619  40.121  39.224  1.00 38.49      clus C  
ATOM   4778  CD1 ILE A 617     -45.077  43.053  38.627  1.00 41.17      clus C  
ATOM   4779  N   TYR A 618     -43.859  40.576  43.467  1.00 51.34      clus N  
ATOM   4780  CA  TYR A 618     -42.961  41.034  44.531  1.00 44.44      clus C  
ATOM   4781  C   TYR A 618     -41.644  41.665  44.079  1.00 37.83      clus C  
ATOM   4782  O   TYR A 618     -40.924  41.122  43.231  1.00 27.15      clus O  
ATOM   4783  CB  TYR A 618     -42.684  39.880  45.496  1.00 50.94      clus C  
ATOM   4784  CG  TYR A 618     -43.924  39.121  45.912  1.00 51.76      clus C  
ATOM   4785  CD1 TYR A 618     -44.195  37.860  45.387  1.00 54.78      clus C  
ATOM   4786  CD2 TYR A 618     -44.831  39.665  46.825  1.00 53.26      clus C  
ATOM   4787  CE1 TYR A 618     -45.339  37.159  45.759  1.00 58.91      clus C  
ATOM   4788  CE2 TYR A 618     -45.981  38.972  47.205  1.00 51.48      clus C  
ATOM   4789  CZ  TYR A 618     -46.222  37.722  46.667  1.00 55.49      clus C  
ATOM   4790  OH  TYR A 618     -47.340  37.024  47.040  1.00 57.69      clus O  
ATOM   4791  N   ILE A 619     -41.308  42.775  44.730  1.00 38.12      clus N  
ATOM   4792  CA  ILE A 619     -40.112  43.552  44.430  1.00 43.02      clus C  
ATOM   4793  C   ILE A 619     -38.777  42.845  44.638  1.00 49.07      clus C  
ATOM   4794  O   ILE A 619     -38.445  42.443  45.752  1.00 48.60      clus O  
ATOM   4795  CB  ILE A 619     -40.119  44.851  45.225  1.00 38.03      clus C  
ATOM   4796  CG1 ILE A 619     -41.369  45.653  44.853  1.00 38.59      clus C  
ATOM   4797  CG2 ILE A 619     -38.842  45.633  44.962  1.00 45.45      clus C  
ATOM   4798  CD1 ILE A 619     -41.624  46.891  45.698  1.00 35.35      clus C  
ATOM   4799  N   GLY A 620     -38.006  42.741  43.556  1.00 52.72      clus N  
ATOM   4800  CA  GLY A 620     -36.709  42.094  43.611  1.00 57.54      clus C  
ATOM   4801  C   GLY A 620     -36.372  41.325  42.345  1.00 64.08      clus C  
ATOM   4802  O   GLY A 620     -35.981  41.905  41.334  1.00 65.99      clus O  
ATOM   4803  N   ASP A 621     -36.571  40.015  42.400  1.00 69.18      clus N  
ATOM   4804  CA  ASP A 621     -36.280  39.102  41.294  1.00 74.86      clus C  
ATOM   4805  C   ASP A 621     -37.084  39.312  40.011  1.00 72.68      clus C  
ATOM   4806  O   ASP A 621     -37.783  40.310  39.845  1.00 73.77      clus O  
ATOM   4807  CB  ASP A 621     -36.481  37.663  41.770  1.00 75.56      clus C  
ATOM   4808  CG  ASP A 621     -37.931  37.361  42.125  1.00 75.87      clus C  
ATOM   4809  OD1 ASP A 621     -38.311  37.499  43.310  1.00 73.34      clus O  
ATOM   4810  OD2 ASP A 621     -38.694  36.988  41.207  1.00 79.40      clus O1-
ATOM   4811  N   ASP A 622     -36.966  38.337  39.112  1.00 71.93      clus N  
ATOM   4812  CA  ASP A 622     -37.665  38.336  37.835  1.00 70.43      clus C  
ATOM   4813  C   ASP A 622     -38.919  37.514  38.034  1.00 66.91      clus C  
ATOM   4814  O   ASP A 622     -38.863  36.286  38.066  1.00 64.19      clus O  
ATOM   4815  CB  ASP A 622     -36.817  37.667  36.750  1.00 76.64      clus C  
ATOM   4816  CG  ASP A 622     -35.442  38.288  36.610  1.00 79.94      clus C  
ATOM   4817  OD1 ASP A 622     -34.586  37.665  35.943  1.00 80.55      clus O  
ATOM   4818  OD2 ASP A 622     -35.213  39.387  37.161  1.00 79.84      clus O1-
ATOM   4819  N   ASN A 623     -40.046  38.193  38.192  1.00 65.20      clus N  
ATOM   4820  CA  ASN A 623     -41.315  37.513  38.401  1.00 61.78      clus C  
ATOM   4821  C   ASN A 623     -41.939  37.061  37.094  1.00 57.99      clus C  
ATOM   4822  O   ASN A 623     -42.065  37.847  36.155  1.00 61.93      clus O  
ATOM   4823  CB  ASN A 623     -42.301  38.424  39.135  1.00 62.71      clus C  
ATOM   4824  CG  ASN A 623     -41.882  38.714  40.559  1.00 63.00      clus C  
ATOM   4825  ND2 ASN A 623     -40.737  39.374  40.725  1.00 65.80      clus N  
ATOM   4826  OD1 ASN A 623     -42.587  38.358  41.503  1.00 63.63      clus O  
ATOM   4827  N   PRO A 624     -42.301  35.771  37.000  1.00 55.56      clus N  
ATOM   4828  CA  PRO A 624     -42.922  35.222  35.792  1.00 55.22      clus C  
ATOM   4829  C   PRO A 624     -44.345  35.767  35.707  1.00 54.79      clus C  
ATOM   4830  O   PRO A 624     -45.101  35.711  36.682  1.00 58.31      clus O  
ATOM   4831  CB  PRO A 624     -42.900  33.718  36.048  1.00 53.78      clus C  
ATOM   4832  CG  PRO A 624     -43.024  33.633  37.529  1.00 55.32      clus C  
ATOM   4833  CD  PRO A 624     -42.082  34.712  37.999  1.00 55.78      clus C  
ATOM   4834  N   LEU A 625     -44.699  36.304  34.545  1.00 54.50      clus N  
ATOM   4835  CA  LEU A 625     -46.011  36.900  34.357  1.00 53.52      clus C  
ATOM   4836  C   LEU A 625     -46.653  36.485  33.048  1.00 52.19      clus C  
ATOM   4837  O   LEU A 625     -46.008  36.479  32.002  1.00 48.26      clus O  
ATOM   4838  CB  LEU A 625     -45.867  38.424  34.391  1.00 58.40      clus C  
ATOM   4839  CG  LEU A 625     -47.088  39.279  34.065  1.00 63.97      clus C  
ATOM   4840  CD1 LEU A 625     -47.873  39.560  35.336  1.00 57.13      clus C  
ATOM   4841  CD2 LEU A 625     -46.623  40.572  33.420  1.00 63.66      clus C  
ATOM   4842  N   THR A 626     -47.936  36.166  33.101  1.00 48.30      clus N  
ATOM   4843  CA  THR A 626     -48.620  35.789  31.885  1.00 49.19      clus C  
ATOM   4844  C   THR A 626     -49.896  36.573  31.689  1.00 51.64      clus C  
ATOM   4845  O   THR A 626     -50.693  36.721  32.617  1.00 56.81      clus O  
ATOM   4846  CB  THR A 626     -48.914  34.294  31.839  1.00 45.65      clus C  
ATOM   4847  CG2 THR A 626     -49.608  33.926  30.527  1.00 48.37      clus C  
ATOM   4848  OG1 THR A 626     -47.678  33.577  31.924  1.00 46.23      clus O  
ATOM   4849  N   LEU A 627     -50.048  37.119  30.485  1.00 48.37      clus N  
ATOM   4850  CA  LEU A 627     -51.225  37.887  30.133  1.00 42.52      clus C  
ATOM   4851  C   LEU A 627     -52.109  37.032  29.252  1.00 43.88      clus C  
ATOM   4852  O   LEU A 627     -51.656  36.455  28.263  1.00 43.90      clus O  
ATOM   4853  CB  LEU A 627     -50.839  39.172  29.403  1.00 36.71      clus C  
ATOM   4854  CG  LEU A 627     -49.915  40.152  30.134  1.00 38.80      clus C  
ATOM   4855  CD1 LEU A 627     -49.960  41.520  29.466  1.00 35.66      clus C  
ATOM   4856  CD2 LEU A 627     -50.327  40.274  31.587  1.00 34.84      clus C  
ATOM   4857  N   ILE A 628     -53.363  36.900  29.654  1.00 43.25      clus N  
ATOM   4858  CA  ILE A 628     -54.316  36.116  28.894  1.00 43.16      clus C  
ATOM   4859  C   ILE A 628     -55.152  37.035  28.028  1.00 44.92      clus C  
ATOM   4860  O   ILE A 628     -56.109  37.659  28.499  1.00 47.65      clus O  
ATOM   4861  CB  ILE A 628     -55.192  35.260  29.829  1.00 43.42      clus C  
ATOM   4862  CG1 ILE A 628     -54.348  34.106  30.373  1.00 43.00      clus C  
ATOM   4863  CG2 ILE A 628     -56.432  34.738  29.107  1.00 42.25      clus C  
ATOM   4864  CD1 ILE A 628     -53.479  33.424  29.313  1.00 36.10      clus C  
ATOM   4865  N   VAL A 629     -54.767  37.119  26.758  1.00 44.12      clus N  
ATOM   4866  CA  VAL A 629     -55.443  37.983  25.793  1.00 47.88      clus C  
ATOM   4867  C   VAL A 629     -56.682  37.394  25.097  1.00 46.70      clus C  
ATOM   4868  O   VAL A 629     -56.923  36.190  25.136  1.00 50.99      clus O  
ATOM   4869  CB  VAL A 629     -54.431  38.541  24.734  1.00 49.20      clus C  
ATOM   4870  CG1 VAL A 629     -53.513  39.581  25.384  1.00 42.92      clus C  
ATOM   4871  CG2 VAL A 629     -53.585  37.406  24.121  1.00 48.89      clus C  
ATOM   4872  N   LYS A 630     -57.485  38.270  24.495  1.00 50.29      clus N  
ATOM   4873  CA  LYS A 630     -58.696  37.866  23.779  1.00 52.90      clus C  
ATOM   4874  C   LYS A 630     -59.024  38.888  22.680  1.00 51.65      clus C  
ATOM   4875  O   LYS A 630     -59.705  39.894  22.917  1.00 52.38      clus O  
ATOM   4876  CB  LYS A 630     -59.875  37.712  24.751  1.00 52.98      clus C  
ATOM   4877  CG  LYS A 630     -61.158  37.204  24.106  1.00 55.65      clus C  
ATOM   4878  CD  LYS A 630     -62.279  37.069  25.117  1.00 59.79      clus C  
ATOM   4879  CE  LYS A 630     -61.961  36.007  26.155  1.00 64.25      clus C  
ATOM   4880  NZ  LYS A 630     -63.065  35.828  27.143  1.00 66.28      clus N1+
ATOM   4881  N   ALA A 631     -58.505  38.621  21.483  1.00 46.38      clus N  
ATOM   4882  CA  ALA A 631     -58.703  39.483  20.323  1.00 41.61      clus C  
ATOM   4883  C   ALA A 631     -59.894  39.033  19.487  1.00 41.29      clus C  
ATOM   4884  O   ALA A 631     -59.885  37.934  18.940  1.00 43.25      clus O  
ATOM   4885  CB  ALA A 631     -57.442  39.497  19.464  1.00 45.22      clus C  
ATOM   4886  N   GLN A 632     -60.916  39.880  19.397  1.00 39.87      clus N  
ATOM   4887  CA  GLN A 632     -62.101  39.558  18.616  1.00 40.41      clus C  
ATOM   4888  C   GLN A 632     -62.298  40.574  17.521  1.00 38.41      clus C  
ATOM   4889  O   GLN A 632     -61.814  41.699  17.616  1.00 38.92      clus O  
ATOM   4890  CB  GLN A 632     -63.341  39.576  19.483  1.00 35.33      clus C  
ATOM   4891  CG  GLN A 632     -63.241  38.754  20.715  1.00 39.19      clus C  
ATOM   4892  CD  GLN A 632     -64.263  39.188  21.721  1.00 43.45      clus C  
ATOM   4893  NE2 GLN A 632     -63.808  39.553  22.922  1.00 48.06      clus N  
ATOM   4894  OE1 GLN A 632     -65.453  39.244  21.414  1.00 41.17      clus O  
ATOM   4895  N   ASN A 633     -63.035  40.154  16.496  1.00 42.88      clus N  
ATOM   4896  CA  ASN A 633     -63.381  40.971  15.337  1.00 43.51      clus C  
ATOM   4897  C   ASN A 633     -64.864  40.699  15.146  1.00 47.19      clus C  
ATOM   4898  O   ASN A 633     -65.235  39.598  14.740  1.00 49.97      clus O  
ATOM   4899  CB  ASN A 633     -62.608  40.500  14.091  1.00 36.38      clus C  
ATOM   4900  CG  ASN A 633     -62.827  41.405  12.874  1.00 32.63      clus C  
ATOM   4901  ND2 ASN A 633     -62.255  41.019  11.743  1.00 19.73      clus N  
ATOM   4902  OD1 ASN A 633     -63.500  42.433  12.956  1.00 28.61      clus O  
ATOM   4903  N   GLN A 634     -65.712  41.659  15.502  1.00 51.54      clus N  
ATOM   4904  CA  GLN A 634     -67.158  41.474  15.351  1.00 55.72      clus C  
ATOM   4905  C   GLN A 634     -67.749  42.198  14.147  1.00 56.79      clus C  
ATOM   4906  O   GLN A 634     -68.950  42.099  13.871  1.00 57.40      clus O  
ATOM   4907  CB  GLN A 634     -67.899  41.854  16.634  1.00 65.16      clus C  
ATOM   4908  CG  GLN A 634     -68.703  40.698  17.224  1.00 74.32      clus C  
ATOM   4909  CD  GLN A 634     -67.860  39.446  17.433  1.00 76.94      clus C  
ATOM   4910  NE2 GLN A 634     -67.286  39.316  18.623  1.00 80.24      clus N  
ATOM   4911  OE1 GLN A 634     -67.716  38.613  16.528  1.00 76.68      clus O  
ATOM   4912  N   GLY A 635     -66.893  42.937  13.446  1.00 53.31      clus N  
ATOM   4913  CA  GLY A 635     -67.315  43.653  12.261  1.00 45.11      clus C  
ATOM   4914  C   GLY A 635     -66.850  42.846  11.072  1.00 40.46      clus C  
ATOM   4915  O   GLY A 635     -66.768  41.622  11.146  1.00 38.08      clus O  
ATOM   4916  N   GLU A 636     -66.493  43.526   9.990  1.00 40.57      clus N  
ATOM   4917  CA  GLU A 636     -66.041  42.847   8.789  1.00 37.88      clus C  
ATOM   4918  C   GLU A 636     -64.579  42.424   8.867  1.00 31.74      clus C  
ATOM   4919  O   GLU A 636     -63.960  42.475   9.933  1.00 26.78      clus O  
ATOM   4920  CB  GLU A 636     -66.343  43.711   7.565  1.00 40.12      clus C  
ATOM   4921  CG  GLU A 636     -67.810  44.161   7.581  1.00 54.89      clus C  
ATOM   4922  CD  GLU A 636     -68.321  44.737   6.272  1.00 62.40      clus C  
ATOM   4923  OE1 GLU A 636     -69.265  45.559   6.323  1.00 67.40      clus O  
ATOM   4924  OE2 GLU A 636     -67.812  44.352   5.198  1.00 68.96      clus O1-
ATOM   4925  N   GLY A 637     -64.049  41.957   7.745  1.00 27.85      clus N  
ATOM   4926  CA  GLY A 637     -62.673  41.496   7.707  1.00 25.49      clus C  
ATOM   4927  C   GLY A 637     -61.638  42.581   7.871  1.00 25.56      clus C  
ATOM   4928  O   GLY A 637     -61.573  43.495   7.054  1.00 25.01      clus O  
ATOM   4929  N   ALA A 638     -60.851  42.488   8.939  1.00 23.11      clus N  
ATOM   4930  CA  ALA A 638     -59.795  43.459   9.219  1.00 18.98      clus C  
ATOM   4931  C   ALA A 638     -58.519  42.971   8.563  1.00 19.53      clus C  
ATOM   4932  O   ALA A 638     -58.088  41.859   8.824  1.00 23.63      clus O  
ATOM   4933  CB  ALA A 638     -59.593  43.601  10.717  1.00 16.94      clus C  
ATOM   4934  N   TYR A 639     -57.941  43.787   7.685  1.00 24.66      clus N  
ATOM   4935  CA  TYR A 639     -56.712  43.431   6.977  1.00 30.59      clus C  
ATOM   4936  C   TYR A 639     -55.507  43.724   7.869  1.00 32.17      clus C  
ATOM   4937  O   TYR A 639     -55.522  44.687   8.639  1.00 34.15      clus O  
ATOM   4938  CB  TYR A 639     -56.580  44.229   5.665  1.00 43.27      clus C
[truncated: 535,013 more chars]
